# Supplementary material for: Identification of Genes Associated with Crest Cushion Development in the Chinese Crested Duck
Source: MDPI journal article supplement (doi:10.3390/ani12162150), 2022-08-22
Supplement: s1 [file s1]

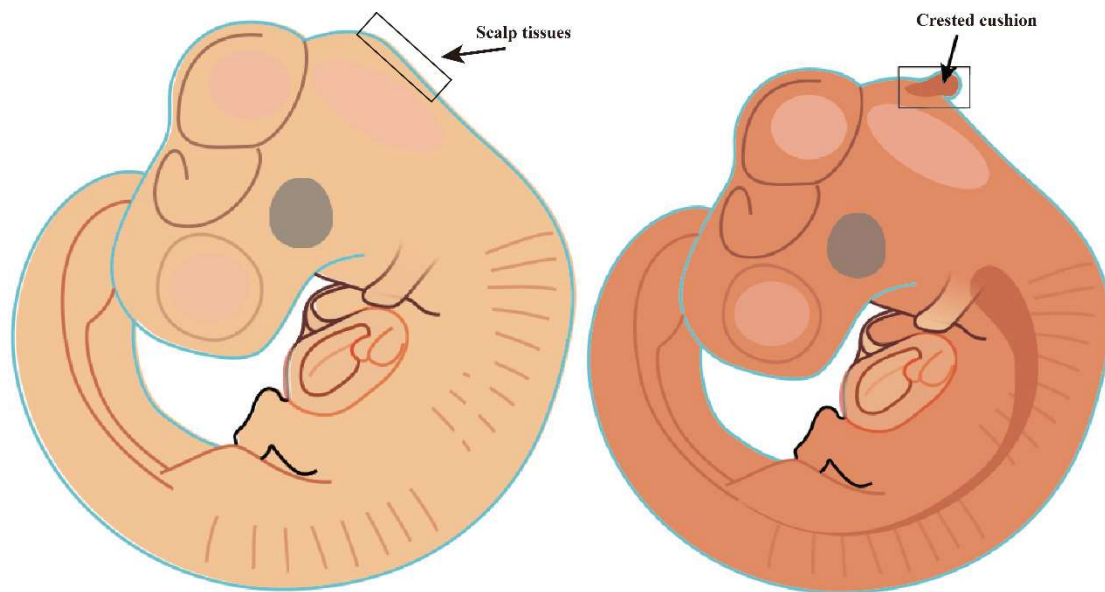

**Figure S1.** The Pattern diagram of the sample. The right pattern diagram represents a normal duck embryo with the area of scalp tissue in the black box. The pattern diagram on the left represents a Chinese crested duck embryo with the area of crest tissue in the black box.
