# Supplementary material for: Identification of Genes Associated with Crest Cushion Development in the Chinese Crested Duck
Source: Animals (Basel). 2022 Aug 22;12(16):2150. doi: 10.3390/ani12162150 (PMC9404885; doi:10.3390/ani12162150)
Supplement: Supplementary file 1 [file animals-12-02150-s001.zip › Table S1 Characteristics of the reads of all transcriptome data in the present study.xlsx]

## Sheet: Sheet1
Table S1. Characteristics of the reads of all transcriptome data in the present study
Group	Sample	raw_reads	clean_reads	Q20	Q30	GC_pct	Total map ratio	Concentration	Volume	Total content	RINe
D42_LR	D42_1_L	55362378	53970692	96.36	91.09	50.64	86.05	527	29	15.283	10
	D42_2_L	49661312	48724370	96.24	90.82	52.96	87.12	523	29	15.167	10
	D42_3_L	47770014	46898922	96.99	92.36	51.56	87.16	552	29	16.008	10
D42_TP	D42_1_TP	49657406	48508828	96.61	91.53	51.39	88.01	507	29	14.703	10
	D42_2_TP	46633056	45686990	96.55	91.47	51.41	87.13	546	29	15.834	10
	D42_3_TP	58446934	57261938	96.87	92.1	51.78	87.23	534	29	15.486	10
D7_L	D7_1_L	43791634	42623644	96.52	91.42	51.34	85.23	498	29	14.442	10
	D7_2_L	54333284	53089090	96.16	90.71	51.56	85.89	518	29	15.022	10
	D7_3_L	51250560	49674314	96.27	90.94	51.51	85.91	529	29	15.341	10
YD7_TP	D7_1_TP	41080632	40078890	96.39	91.21	51.96	85.45	549	29	15.921	10
	D7_2_TP	61927454	60414610	96.62	91.64	51.63	87.13	536	29	15.544	10
	D7_3_TP	62519056	61161488	96.47	91.27	51.61	87.14	517	29	14.993	10
E28_L	E28_1_L	53447288	52207784	96.71	91.78	51.35	86.84	482	29	13.978	10
	E28_2_L	47614352	46542878	96.36	91.09	50.96	86.7	528	29	15.312	10
	E28_3_L	62358410	61086774	96.33	91.03	51.32	86.56	539	29	15.631	10
YE22_TP	YE28_1_TP	59931354	57808134	96.93	92.26	52.19	85.58	492	29	14.268	10
	YE28_2_TP	57701580	55780196	96.81	92.03	51.26	85.5	465	29	13.485	10
	YE28_3_TP	57517330	55439586	96.84	92.08	51.08	85.24	523	29	15.167	10
E22_L	E22_1_L	66416824	64896180	96.13	90.64	51.97	85.85	476	29	13.804	10
	E22_2_L	59342864	58088812	96.69	91.77	52.32	86.08	594	29	17.226	10
	E22_3_L	56046692	54385716	96.57	91.54	51.86	86.17	463	29	13.427	10
YE22_TP	YE22_1_TP	43789548	42201958	96.8	92.02	52.67	84.12	572	29	16.588	10
	YE22_2_TP	53434814	51178896	96.71	91.87	52.42	84.87	468	29	13.572	10
	YE22_3_TP	54867374	52959382	96.65	91.74	51.93	83.37	543	29	15.747	10
E15_L	E15_1_L	50927270	49932640	96.29	90.93	51.41	86.16	471	29	13.659	10
	E15_2_L	49349360	48159104	96.27	90.9	51.31	86.07	527	29	15.283	10
	E15_3_L	51221444	50223262	96.49	91.34	51.39	86.22	523	29	15.167	10
YE15_TP	E15_1_TP	54893138	53686398	96.72	91.8	51.04	86.46	519	29	15.051	10
	E15_2_TP	58352604	57305550	95.95	90.04	50.96	86.34	498	29	14.442	10
	E15_3_TP	45796216	44793678	96.43	91.23	51.22	85.23	528	29	15.312	10
