# Supplementary material for: Identification of Genes Associated with Crest Cushion Development in the Chinese Crested Duck
Source: Animals (Basel). 2022 Aug 22;12(16):2150. doi: 10.3390/ani12162150 (PMC9404885; doi:10.3390/ani12162150)
Supplement: Supplementary file 1 [file animals-12-02150-s001.zip › Table S2. The FPKM of all genes in each sample.xlsx]

## Sheet: Table S2. The FPKM of all genes
Table S2. The FPKM of all genes in each sample
Gene_ID	E15_2_L	E15_3_L	E15_5_L	YE15_1TP	YE15_4TP	YE15_2TP	E22_4_L	E22_2_L	E22_3_L	YE22_6TP	YE22_7TP	YE22_5TP	E28_1_L	E28_9_L	E28_2_L	YE28_6TP	YE28_5TP	YE28_7TP	D7_1_L	D7_3_L	D7_2_L	YD7_2_TP	YD7_3_TP	YD7_1_TP	D42_1_LR	D42_2_LR	D42_3_LR	D42_3_TP	D42_1_TP	D42_2_TP
evm.TU.chr9.104	283.513	398.882	337.666	507.428	610.52	551.377	4531.48	2657.68	3909.76	6500.3	4830.02	5685.18	1340.45	1002.43	1183.17	1962.23	2219.41	1336.04	2760.36	2440.12	2408.99	4442.2	4811.91	4876.83	816.872	394.56	764.004	1222.09	1287.72	1115.71
evm.TU.chr3.1320	3774.22	3713.59	3920.11	3737.76	3679.99	3786.45	2987.11	3061.13	2940.42	3266.03	4045.2	3145.66	2871.81	2944.25	2911.95	2921.07	3280.35	2824.75	2543.53	2738.82	2508.58	2441.62	2984.18	3202.18	2231.5	2417.24	2081	2557.17	2617.94	2417.32
evm.TU.chr26.232	380.203	410.22	416.114	454.169	604.804	548.179	6239.92	3491.97	4669.22	7607.44	6224.13	7356.35	1755.61	1514.44	1366.83	1997.13	3139.09	1565.37	3286.45	2378.52	2391.34	6435.45	7343.33	7948.07	825.939	528.546	796.101	1921.9	1357.57	1294.76
evm.TU.chr15.195	441.873	514.843	513.165	685.084	605.366	610.915	4227.27	2999.25	3603.65	6459.53	4028.1	5100.73	2931.31	2821.39	2996.53	2693.58	3182.31	2546.76	4596.97	4293.74	4418.95	7622.94	8373.83	7256.47	3966.89	1148.78	3217.08	3090.38	3756.92	3251.69
evm.TU.chr6.90	181.251	242.01	237.741	305.528	342.523	249.134	2538.29	1886.67	2595.36	2712.01	1893.1	2655.58	1390.04	1039.14	777.583	825.906	1543.83	914.585	1878.82	1488.39	1339.44	2867.32	2652.83	2438.88	1354.28	311.978	1162.13	1550.59	1653.08	1478.25
evm.TU.chr16.403	2620.47	2415.98	2247.59	2126.23	2100.95	2285.72	2081.32	2007.85	1941.82	1823.36	1490.77	1588.97	2254.83	2084.86	2176.59	2071.41	1834.68	2341.08	2583.11	2756.29	3009.98	2341.82	2086.92	2468.12	3039.9	1972.74	2049.65	2143.81	2592.13	2558.48
evm.TU.chr21.378	69.7251	51.985	57.8483	80.3668	82.2457	52.4549	1007.07	1050.18	1018.38	1804.23	643.805	1018.32	1397.25	1358.16	1720.95	1357.46	1530.52	1066.66	1033.29	712.299	1275.59	1283.6	1402.16	1075.34	160.133	57.8338	76.4886	209.41	456.473	223.681
evm.TU.chr20.76	193.65	207.26	215.953	248.705	238.519	235.738	701.604	935.41	781.126	1227.29	1426.81	1010.18	2789.31	2776.71	2544.05	4781.88	4120.65	3103.62	1201.15	881.643	1455.7	3766.45	3895.1	2467.39	1504.78	982.79	1484.53	2704.11	3290.12	4653.44
evm.TU.Contig153_pilon.4	33052	30189.6	30641	23029.7	24612.1	24893.7	22508.5	22295.2	23416.9	18244.1	17473.2	14975.4	24056.7	27837.7	26484.5	20923.4	18571.9	23070.5	32524.3	34225.8	45104	16657.2	17625.1	19067.4	20492.9	23928.6	27719.9	23821	22482.9	28556
evm.TU.chr6.197	140.552	154.372	114.473	174.863	162.763	148.945	1908	1437	1546.4	1953.81	1824.76	1688.04	710.858	636.617	635.91	839.192	1048.27	689.547	1183.82	831.495	806.944	1465.38	1082.66	1340.6	708.535	268.198	695.029	851.047	686.047	775.413
evm.TU.chr19.96	2436.64	2237.18	1949.06	2090.71	2200.57	2308.57	1872.39	2013.51	1782.68	1766.63	2217.5	1810.01	1769.91	2101.23	1961.51	2288.94	2593.5	1931.57	1708.24	1957.03	2036.59	1777.18	2600.94	2443.78	2100.81	1362.03	1478.94	1561.28	1800.68	1553.81
evm.TU.chr16.237	32.5279	26.6368	25.6256	32.2355	33.5951	31.1607	292.263	245.205	310.802	364.127	373.913	239.069	680.148	626.788	900.686	760.186	531.53	1095.15	544.848	324.348	596.969	608.516	728.551	409.744	140.16	38.681	13.129	342.317	507.133	479.631
evm.TU.chr6.195	122.427	125.588	85.0783	147.296	167.841	134.728	1444.65	1182.33	1004.97	1589.17	1359.45	1218.97	761.349	778.965	738.153	1130.32	1263.31	779.944	931.179	658.161	774.198	1390.83	1230.21	1270	592.622	222.787	764.136	781.469	594.863	718.27
evm.TU.chr28.7	203.435	193.815	176.447	210.971	210.877	200.639	1073.75	1093.68	1314.77	1674.45	1414.83	982.224	3897.4	4144.83	4337.95	4239.75	3635.68	5211.99	2370.13	1572.88	3995.65	2961.35	2734.83	1721.27	63.0647	114.763	16.5786	973.964	1547.84	1446.86
evm.TU.chr12.452	138.579	125.362	129.112	145.351	154.081	160.21	243.788	230.032	246.979	315.588	282.473	227.603	515.006	521.814	615.891	707.568	522.088	904.843	399.046	315.156	557.997	494.678	571.737	397.611	223.196	124.088	88.0565	309.367	465.398	419.65
evm.TU.chr1.2260	60.9877	63.4401	69.1357	130.988	128.65	127.283	464.348	365.82	397.744	718.257	509.139	587.104	329.567	294.912	299.546	361.816	404.402	288.327	430.564	296.218	467.142	773.856	709.277	659.013	346.523	134.7	341.431	355.024	383.985	346.909
evm.TU.chr4.688	1010.94	1195.02	1250.01	1591.07	1361.45	1398.42	737.238	751.485	784.847	1057.83	1072.04	1012.96	664.986	811.222	598.623	924.468	887.964	622.542	935.378	863.756	950.143	753.002	665.118	834.455	532.675	1058.93	753.205	760.28	697.951	797.484
evm.TU.chr9.166	646.779	726.521	617.91	757.246	730.374	703.208	1658.54	1852.8	2344.44	791.408	658.046	633.821	1549.85	1701.97	1229.74	956.067	796.855	746.592	2308.36	2009.51	2548.09	1550.58	1132.91	1181.39	2642.45	808.432	3197.03	2185.97	1209.86	1749.97
evm.TU.chr5.1191	2166.33	2209.08	1905.51	1635.2	1677.6	1750.78	1894.82	2491.09	2287.31	2117.75	2185.7	1942.68	1818.06	3266.97	2827.1	3573.34	3606.93	3134.02	2365.67	2181.2	2619	3181.46	2690.07	3592.18	2197.13	1285.74	3557.08	5329.54	2097.99	4068.95
evm.TU.chr2.1140	1451.9	1466.12	1358.87	1267.11	1303.56	1449.53	1212.85	1204.57	1164.56	1138.68	1436.75	1102.62	1562.02	1546.45	1211.51	1111.98	1170.7	1020.44	1032.9	1161.98	1111.7	950.975	1027.21	1213.7	962.034	1140.55	1023.01	1076.97	972.09	1009.67
evm.TU.chr6.430	12.4495	11.5027	9.20647	9.6718	14.3458	17.1679	417.975	474.627	400.685	718.218	597.447	496.217	2367.84	2435.88	2495.61	2371.32	1671.32	3493.42	983.932	855.815	1832.88	1567.15	1432.54	1015.67	581.149	298.519	79.1806	1777.44	2574.76	2963.13
evm.TU.chr6.454	37.2252	31.6389	33.6899	58.2603	62.0816	60.4723	199.709	183.275	191.908	266.199	262.962	178.524	463.528	428.606	600.529	636.038	406.655	760.555	485.981	227.824	391.957	572.131	571.206	371.183	72.9467	32.6663	15.3008	278.944	465.219	423.935
evm.TU.chr2.416	2154.89	2145.71	2374.88	2289.4	2152.06	2148.86	1781.88	1714.3	1752.5	1786.75	1807.84	1613.85	1325.72	1545.63	1249.6	1399.78	1427.66	1220.46	2012.33	2152.26	2146.59	1498.48	1436.97	1771.82	944.841	1704.49	1381.76	1511.11	1277.48	1275.73
evm.TU.chr8.254	2669.75	2833.9	3037.29	3225.08	3284.54	3092.29	1951.87	2067.85	2143.15	2048.97	3292.15	2020.87	1559.08	1890.63	1681.54	1944.64	1711.3	1557.08	2026.02	2264.11	2417.73	1845.29	1644.14	2004.89	1314.41	2242.99	2282.54	2234.6	1552.94	1666.69
evm.TU.chr6.54	89.8445	88.5769	96.9538	144.785	117.399	88.8773	605.4	708.958	838.642	764.29	600.964	659.482	1143.32	1204.01	1062.83	1008.08	949.734	1217.58	556.229	428.534	756.668	802.777	877.459	594.627	1167.07	300.709	734.056	576.036	599.658	700.266
evm.TU.chr1.1650	315.768	303.205	302.736	262.247	297.277	279.814	590.14	486.162	555.634	565.743	412.849	536.537	537.131	506.286	543.376	461.079	452.91	300.207	487.52	440.182	446.537	513.015	482.934	380.607	467.013	240.593	512.943	394.906	548.134	441.756
evm.TU.chr6.131	157.539	157.969	175.846	221.267	243.754	227.386	304.552	251.884	264.834	308.176	238.481	218.166	211.109	186.885	214.268	203.754	196.649	201.328	173.131	144.929	173.2	251.47	241.054	227.308	238.741	78.0723	129.856	353.93	210.11	195.027
evm.TU.chr1.1775	418.085	379.171	373.893	339.763	327.926	355.747	285.573	273.506	282.742	349.861	309.744	243.138	236.037	219.924	255.242	263.253	243.417	294.855	267.345	303.86	346.234	282.138	277.142	271.728	147.094	282.926	196.007	285.085	298.788	271.381
evm.TU.chrZ.470	1087.32	1037.14	1147.79	1168.71	1055.24	1153.27	689.34	802.506	1236.47	1298.76	870.671	1252.65	1084.59	1246.96	1006.87	746.464	737.53	595.155	854.972	908.648	970.362	1040.61	1050.77	739.3	977.108	864.984	761.676	749.454	1069.08	671.71
evm.TU.chr1.809	25.7304	23.5288	22.172	23.652	22.4822	23.3593	175.264	191.605	197.984	175.991	136.318	117.039	532.251	488.889	525.97	398.302	356.07	444.27	202.176	187.293	202.074	275.962	323.917	222.453	412.674	83.8115	160.011	198.386	264.376	248.674
evm.TU.chr16.504	2740.94	2596.03	2710.08	2973.09	2687.9	2542.14	1565.22	1703.69	1534.62	1779.78	1875.77	1680.91	1147.31	1269.82	1097.83	1651.42	1544.73	1272.81	1712.6	2033.26	1639.02	1293.86	1217.98	1597.08	970.065	2010.34	1403.32	1670.81	1331.58	1406.19
evm.TU.chr1.977	521.861	472.509	504.481	565.725	494.049	556.81	246.752	358.077	352.711	271.784	297.275	250.889	423.94	475.074	461.503	430.83	420.963	397.817	407.221	420.668	399.751	285.804	316.292	315.482	277.686	342.383	293.07	345.543	300.872	284.875
evm.TU.chr20.405	12.4827	11.99	18.7136	43.1376	27.4636	11.4998	21.5223	43.9529	23.2135	70.1196	134.813	106.344	1222.79	1270.51	956.104	850.703	1380.27	624.729	436.125	313.202	828.766	2800.27	1631.45	1964.13	1453.85	605.501	920.291	2638.39	3161.94	6865.28
evm.TU.chr12.106	1552.06	1481.61	1419.5	1455.83	1347.27	1313.93	906.933	905.686	908.275	926.466	1101.93	873.639	800.249	818.886	765.457	919.798	962.884	789.917	893.808	1137.84	986.117	761.954	779.56	930.167	588.781	1049.17	791.528	831.32	802.459	730.642
evm.TU.chr1.1234	1267.18	1251.72	1307.7	1283.6	1200.17	1118.09	788.932	759.424	763.95	735.64	1041.6	871.273	708.538	789.817	598.515	884.189	1021.14	773.331	825.669	1018.7	992.561	699.827	702.297	842.35	533.741	936.05	675.815	743.733	701.426	706.436
evm.TU.chr16.206	4401.86	6444.67	6988.15	2500.3	4943.84	4175.62	3394.31	1862.97	5127.39	1080.63	708.032	1319.24	578.543	1012.54	634.796	448.241	485.778	526.856	2745.11	4028.18	2589.55	992.722	1186.29	2659.9	3961.35	478.657	2047.23	878.965	398.362	825.322
evm.TU.chr8.687	1742.87	1658.75	1717.48	1675.48	1550.48	1569.13	1215.94	1271.87	1161.53	1179.03	1336.29	1125.82	1080.69	1264.42	1034.45	1240.68	1168.73	1094.02	1213.5	1356.04	1444.37	992.505	996.785	1150.54	780.896	1404.44	1144.5	1214.54	1110.3	1078.45
evm.TU.chr22.257	538.895	613.554	644.606	510.179	480.483	511.946	584.064	531.854	538.229	720.698	635.596	584.143	428.687	439.069	407.748	533.507	480.204	485.313	651.065	631.224	696.351	644.916	570.709	607.206	281.629	492.934	368.518	673.176	554.896	563.94
evm.TU.chr14.384	1826.76	1774.8	1605.06	1664.15	1601.85	1683.17	1174.58	1270.41	1323.43	1258.78	1317.45	1099.59	1169.94	1435.57	1268.16	1318.21	1447.25	1360.61	1151.33	1514.22	1429.65	1122.64	1190.31	1191.09	869.676	1252.09	1083.37	1079.94	1013.68	980.299
evm.TU.chr1.2202	1611.33	1656.2	1715.94	1665	1497.4	1600.61	1086.97	1197.6	989.723	1032.46	1227.6	1064.05	1016.4	1172.53	967.095	1145.74	1119.07	992.893	1218.16	1545.53	1346.24	936.394	954.531	995.934	669.128	1127.33	870.215	962.098	880.484	869.167
evm.TU.chr6.246	1769.84	1715.98	1810.3	1908.07	1762.29	1820.99	1176.29	1239.48	1371.65	1426.75	1553.25	1360.98	1417.15	1511.47	1428.76	1618.12	1689.15	1373.57	1245.81	1483.21	1421.71	1178.85	1344.1	1463.47	997.61	1375.03	1365.53	1337.24	1149	1046.31
evm.TU.chr30.34	832.904	803.876	885.597	1114.32	951.395	1008.08	1163.21	1425.82	1687.63	1927.51	1077.26	1293.58	2576.42	2361.6	2392.24	2841.56	1925.25	3076.88	2560.67	1625.87	4365.28	2448.36	2091.12	1714.23	1287.7	813.276	1045.95	1911.77	2087.82	2377.08
evm.TU.chr22.35	30.0631	32.4391	30.5782	24.628	28.1491	26.6985	116.413	98.752	112.922	106.716	81.1621	89.9483	124.811	99.444	125.52	121.145	102.089	126.277	78.141	76.1264	89.1637	91.3265	100.172	83.261	118.166	33.807	65.3846	69.176	59.226	67.7785
evm.TU.Contig153_pilon.5	8086.4	7128.57	7536.38	4147.27	4399.91	4720.93	4266.68	4545.74	5922.53	3222.91	2948.52	2528.92	5649.58	5099.41	4521.91	3246.61	2834.55	4363.92	6928.35	8029.78	11508.8	3273.35	3544.1	3223.01	5009.47	4602.93	6565.15	4099.73	3677.38	5456.26
evm.TU.chr32.60	919.804	879.559	866.021	919.724	835.986	944.652	582.709	624.516	607.352	635.724	762.657	598.376	592.704	666.352	569.222	682.968	786.301	626.188	587.834	698.975	584.984	555.406	528.451	699.45	404.925	644.154	511.392	573.131	500.25	489.473
evm.TU.chr22.18	2024.77	1958.25	2100.69	2170.69	2171.95	2151.12	1490.01	1354.28	1288.72	1609.67	1316.72	1315.11	1130.73	1157.34	1022.25	1166.64	1149.81	1060.76	1682.47	1841.29	2085.61	1283.8	1186.67	1290.72	976.472	1138.01	1169.15	1311.2	987.223	1029.96
evm.TU.chr18.407	1322.38	1384.79	1417.36	1322.6	1327.92	1256.41	839.878	863.705	779.318	739.693	853.417	730.353	642.16	775.741	583.378	709.022	747.765	590.329	836.023	963.581	1017.72	559.242	570.99	660.892	456.295	958.587	657.182	729.332	672.384	699.798
evm.TU.chr2.1038	1.134	46.8149	0.224383	0.32544	0.446093	0.137005	2777.67	4275.77	6665.3	113.779	143.113	32.8776	4110.55	5239.99	1656.65	143.824	235.133	247.612	4207.91	4240.73	7464.14	456.291	339.589	227.301	14098.6	2471.22	14483.4	1061.83	754.729	1028.73
evm.TU.chr3.62	1260.4	1235.08	1349.7	1322.54	1164.85	1398.17	1063.85	1098.74	1125.55	1126.74	1359.12	1046.97	922.239	1153.66	812.201	982.824	975.757	803.913	1023.69	1127.42	1194.43	799.806	759.031	896.495	693.737	1140.3	1011.73	1046.95	885.376	925.77
evm.TU.chr13.66	3635.41	3215.69	3049.91	3193.9	2851.97	3035.29	2372.13	2191.8	2292.4	2177.77	2592.87	2115.37	1979.08	2121.05	1893.94	2457.4	2393.85	2046.71	2055.37	2833.32	2666.05	1795.84	1732.31	2242.74	1429.06	2413.32	2291.52	2128.16	1926.64	1859.78
evm.TU.chr2.1298	5757.45	5122.11	5669.72	6165.98	5791.95	5008.87	3948.44	3906.22	4284.95	4154.88	4776.84	4080.95	3588.42	4049.75	3719.83	4505.02	4261.75	3462.06	3742.77	4460.52	5199.65	3362.05	3326.68	3856.12	3541.25	4224.76	5007.57	4232.29	3444.59	3489.09
evm.TU.chrZ.958	1469.89	1841.5	2288.6	2804.78	2267.47	2530.4	1372.76	1622.26	2862.09	3741.36	2310.81	3355.69	1877.12	2341.37	1848.77	1583.07	1535.22	1192.37	1544.27	1797.85	1915.61	2265.18	2416.86	1423.13	1699.54	1484.67	1216.64	1326.54	2058.26	1219.04
evm.TU.chr3.981	267.841	260.835	295.609	388.577	328.853	328.124	201.09	271.379	241.815	272.038	331.894	286.067	199.771	258.368	202.13	304.127	275.904	223.314	226.894	240.71	247.626	184.27	192.125	211.781	156.621	237.624	216.891	219.569	162.173	196.504
evm.TU.chr29.82	1915.01	2120.56	1667.33	1255.21	1516.97	1312.78	8989.42	1946.39	9242.19	2169.1	2659.23	3458.96	0.697032	0.723362	1.53073	1.76437	0.441292	0.555638	3.71066	2.81962	0.728571	1.82279	1.92887	2.24025	0.283011	11.8081	0.614312	39.8882	25.8297	5.93155
evm.TU.chr15.172	701.352	644.352	718.023	736.464	684.673	718.788	591.244	625.337	604.458	714.328	802.106	613.765	544.015	650.592	542.045	760.55	778.599	623.799	551.478	567.316	666.179	513.329	551.715	629.445	366.8	560.909	445.197	557.05	513.137	524.206
evm.TU.chr10.397	348.001	386.884	391.998	353.991	369.892	381.627	482.65	464.08	473.329	550.944	489.026	504.902	336.895	333.721	296.591	302.254	345.696	264.43	463.206	406.661	354.58	415.13	464.201	485.353	314.097	494.468	387.471	455.915	343.356	372.581
evm.TU.chr26.98	3756.47	4218.92	4196.85	5125.03	4398.6	4680.73	2755.48	4198.74	3466.06	4125.45	4329.11	3611.6	2711.82	3133.25	2860.14	3802.55	4291.4	3603.33	3599.67	3345.9	4187.97	2959.65	3064.46	3164.49	2331.9	3712.88	3575.97	3476.65	2724.6	3113.01
evm.TU.chr24.68	74.9494	79.3107	88.0358	86.8787	78.3573	75.758	134.605	128.611	121.31	156.085	138.448	132.117	145.337	127.198	189.2	167.662	138.585	210.993	128.977	101.733	130.844	152.86	153.357	124.229	128.853	82.6595	101.019	128.018	146.341	135.364
evm.TU.chrZ.163	293.274	271.009	275.941	316.494	323.02	351.886	756.759	940.477	1328.66	1557.22	938.586	1063.59	3788.12	3317.09	3998.64	2188.53	1927.46	2526.96	1450.96	1075.15	2529.92	2478.67	2472.12	1184.18	1125.5	322.846	251.379	939.687	2070.46	1313.99
evm.TU.chr6.143	35.8002	35.8719	33.4999	34.3314	38.9503	31.6534	405.14	408.164	390.911	325.318	294.4	295.753	130.558	109.97	101.035	105.044	117.578	98.076	221.604	183	173.738	232.237	198.1	206.172	193.507	70.6226	162.933	228.605	125.648	152.312
evm.TU.chr10.198	668.798	625.524	621.921	771.041	743.387	742.219	747.706	714.958	567.778	671.314	767.355	724.583	973.279	1010.29	1107.62	1204.38	1155.23	1056.71	947.893	893.155	843.916	931.769	984.724	1103.83	924.682	725.114	713.898	889.51	926.083	852.025
evm.TU.chr20.351	1652.02	2133.23	2261.73	2293.9	2302.73	2210.71	2270.43	2218.61	2534.67	2339.78	2573.86	1727.81	1748.54	1967.41	1728.4	1592.2	2194.33	1780.73	1818.45	1649.29	2411.96	1671.34	1560.28	1303.54	1229.52	1567.61	1494.16	1525.6	1537.87	1594.18
evm.TU.chr12.573	29.9009	35.5688	32.0786	57.5031	59.0212	48.8984	157.986	87.708	136.63	204.582	143.663	183.595	107.615	88.577	107.675	95.107	138.556	80.4617	102.515	75.0887	95.511	151.955	145.437	122.352	167.526	53.9401	210.76	137.697	159.636	151.436
evm.TU.chr29.209	172.554	162.701	102.215	158.364	161.306	95.978	900.553	943.176	763.817	759.983	1374.42	704.02	1221.57	1395.63	1499.25	1791.52	1668.49	1781.06	497.118	515.953	822.9	730.827	814.17	536.993	1241.64	398.146	848.336	583.75	667.429	701.474
evm.TU.chr27.270	1513.68	1406.04	1269	1052.31	1060.75	1155.33	1167.26	1223.14	1246.9	1127.09	1667.74	1144.92	1853.05	1850.68	1973.38	1734.98	1820.27	1662.83	984.741	1359.44	1238.28	1157.51	1468.07	1397.95	1170.86	1048.42	958.352	995.226	1147.74	885.152
evm.TU.chr26.136	3256.25	3180.84	3322.13	3561.24	3180.82	3694.74	2596.78	2822.46	2776.14	2936.92	3423.64	3097.2	2627	3018.32	2775.79	3251.17	3691.72	2696.74	2873.34	3186.83	3500.62	2405.81	2438.18	2736.46	1847.5	2837.54	2610.55	2724.62	2467.05	2576.66
evm.TU.chr5.1033	9.39527	9.20904	10.2407	9.07209	10.009	7.54448	61.1898	88.928	82.7572	13.5787	11.9077	15.3562	879.466	796.688	499.361	20.2921	30.17	25.8264	238.352	252.398	244.534	26.4906	39.8496	21.2695	1823.78	265.002	1398.78	74.3383	57.5855	84.6756
evm.TU.chr1.2331	20.522	9.94732	8.42371	4.32314	4.04875	6.33035	178.695	1063.65	354.771	245.903	230.779	177.213	8387.91	10920.2	9964.83	13377.1	11659.3	9494.98	4191.8	3658.18	7075	5923.05	6967.08	5393.75	7815.19	1526.32	3594.16	3867.94	6641.46	5215.93
evm.TU.chr2.56	1555.88	1554.08	1560.57	1784.96	1615.5	1614.19	1054.2	1125.89	1101.36	1155.2	1387.85	1122.99	1005.09	1136.39	927.646	1235.49	1195.34	979.5	1176.18	1320.98	1302.76	926.731	957.587	1118.58	675.7	1311.03	1023.31	1041.69	897.7	938.277
evm.TU.chr5.1336	507.682	493.241	507.168	480.251	492.602	487.595	345.186	367.775	324.571	329.096	307.929	308.172	457.676	468.595	515.704	458.321	457.97	453.678	480.916	544.045	420.327	475.641	421.07	478.588	445.615	424.15	378.707	487.565	493.294	493.376
evm.TU.chr1.432	2262.82	2448.72	2599.95	2822.49	2607.25	2614.13	1995.45	2386.64	2296.89	2308.2	2996.63	2438.86	2096.33	2177.16	1982.04	2181.94	2196.54	1926.79	2140.04	2346.48	2599.53	1626.25	1889.89	1906.72	1470.09	2197.17	2220.97	1868.18	1730.18	1875.73
evm.TU.chr20.221	1948.08	2084.86	2099.16	2301.27	2215.41	2307.79	1331.05	1085.59	1309.98	1684.7	1748.01	1313.52	1002.87	1232.23	1126.04	1498.52	1505.87	1259.9	1340.69	1325.68	1354.13	1314.96	1433.07	1645.89	813.233	1453.86	975.596	1027.83	1093.61	1057.26
evm.TU.chr1.2521	1751.17	1748.7	1853.05	1816.94	1584.43	1732.89	1231.92	1298.12	1219.76	1306.51	1506.35	1292.4	1050.03	1210.24	1014.83	1271.46	1271.69	1080.52	1275.13	1440.68	1427.32	965.375	1014.31	1148.36	753.347	1340.5	1075.31	1095.85	999.595	1017.93
evm.TU.chr27.74	3259.77	2942.11	3335.79	3052.52	2692.36	2706.96	1973.24	2448.49	2254.45	2234.46	2368.01	2199.51	1885.35	2437.78	1875.2	2286.53	2125.67	1829.53	2346.28	2540.31	2745.83	1604.81	1681.07	2012.82	1417.14	2624.26	2329.63	2200.26	1791.13	1973.4
evm.TU.chr1.1231	191.536	206.751	211.379	200.919	195.941	230.479	163.476	155.041	139.62	145.253	153.069	141.168	265.894	275.923	307.038	241.693	219.595	301.062	168.842	144.802	129.374	191.537	181.704	200.839	225.384	169.878	181.352	267.19	239.986	266.527
evm.TU.chr24.232	9.96815	13.2715	10.2924	8.34371	7.36905	8.99648	352.657	1392.99	1120.68	185.838	406.934	328.582	5420.18	5787.15	2136.7	394.055	526.184	277.722	354.865	546.845	1231.95	264.295	367.252	232.91	4748.49	583.745	2517.53	373.935	447.963	628.335
evm.TU.chr1.808	28.8213	27.2304	27.7233	25.9086	24.7086	26.4201	139.16	146.011	156.813	137.116	114.621	110.09	337.774	305.19	339.619	288.029	260.64	333.498	156.999	147.74	154.899	197.748	217.934	157.275	310.15	65.738	112.229	155.249	215.43	209.449
evm.TU.chr1.24	2587.51	2599.48	2710.22	3646.29	3077.27	2938.1	1818.95	2483.38	2111.47	2879.94	3213.91	2625.59	1816.49	2122.72	1762.67	2877.69	2876.31	1887.31	2105.34	2476	3016.84	2253.46	1905.52	2676.49	1272.92	2218.11	1844.67	1961.37	1563.34	1717.59
evm.TU.chr5.1309	1553	1493.36	1714.66	1963.45	1586.91	1721.01	1075.85	1276.42	1097.05	1239.35	1526.68	1228.21	1049.82	1235.31	915.224	1287.93	1178.68	951.058	1252.57	1296.26	1402.94	985.973	968.784	1113.02	753.885	1479.69	1223.28	1217.7	1064.77	1144.17
evm.TU.chr4.382	1806.93	1775.84	1891.76	1925.86	1747.57	1886.11	1411.65	1446.93	1382.85	1490.44	1623.9	1429.45	1239.13	1405.35	1115.01	1387.17	1473.53	1145.57	1441.27	1461.55	1745.14	1113.42	1125.05	1367.02	912.136	1407.55	1248.56	1285.82	1151.53	1185.59
evm.TU.chr7.471	165.626	174.155	197.617	157.157	171.226	172.946	143.228	209.001	219.724	134.28	117.988	114.292	186.526	226.99	207.558	212.742	178.111	182.083	252.62	235.796	239.86	272.857	190.287	301.562	367.777	244.395	284.912	305.866	318.835	310.472
evm.TU.chr2.1001	575.941	608.082	577.964	624.305	550.124	593.097	425.61	404.811	395.443	416.354	487.395	407.17	390.148	420.043	371.245	467.851	472.407	405.517	483.133	500.939	473.197	378.239	392.445	461.072	300.895	462.974	407.24	417.91	397.645	388.377
evm.TU.chr7.611	2011.79	2051.61	2160.31	2304.67	2200.39	2185.12	1894.4	1970.6	1790.64	2098.04	2226.09	2048.35	1971.78	2060.63	1890.57	2226.04	2233.94	1824.01	1776.47	2061.13	2509.79	1671.02	1617.74	1844.88	1378.71	1780.25	1825.04	1792.29	1662.63	1652.75
evm.TU.chr32.16	2292.12	2240.43	2158.78	2554	2086.96	2509.48	1694.01	1812.98	1713.84	2111.64	2093.45	1763.35	1875.45	2270	1977.63	2089.94	2234.3	2083.65	1846.03	2083.92	2216.37	1748.92	1654.58	2050.56	1231.47	1890.01	1670.15	1778.74	1841.84	1480.22
evm.TU.chr1.505	62.7723	173.672	115.037	361.474	358.024	324.384	392.016	408.579	297.947	420.149	433.351	360.627	429.775	506.069	311.367	193.517	226.843	283.153	186.646	181.272	352.119	474.349	363.282	394.728	399.594	48.7216	242.271	377.436	294.246	437.505
evm.TU.chr24.238	132.504	112.412	134.556	164.263	203.774	252.001	1129.53	1368.14	1485.42	1787.26	1342.3	1049.17	2978.6	3051.11	3125.26	3345.65	2595.33	4727.17	2224.01	1675.75	3661.37	2951.07	2674.58	1831.4	1491.53	308.31	182.024	1582.73	2354.55	2254.57
evm.TU.chr12.460	321.793	323.04	300.383	262.795	271.876	259.92	878.047	733.957	822.345	692.12	579.59	620.572	583.103	560.606	446.232	320.04	309.724	298.712	646.962	686.719	775.368	587.94	405.433	427.063	781.387	434.761	1024.01	817.474	682.14	723.224
evm.TU.chr15.179	22.0556	30.6163	34.3767	44.1981	37.4243	38.6779	1042.31	824.476	740.063	1322.18	1212.78	1204.66	1320.04	1362.68	846.959	1308.22	1972.89	1461.28	546.635	542.743	848.211	1033.37	1115.93	988.911	919.53	296.304	572.19	798.386	703.871	900.864
evm.TU.chr2.1331	276.847	233.964	213.311	247.235	229.97	267.073	189.093	172.587	220.211	210.688	220.573	213.57	109.461	92.74	186.668	200.068	214.678	181.333	154.064	189.319	207.053	144.967	149.878	189.715	128.261	161.087	85.2665	86.1761	163.964	146.726
evm.TU.chr15.322	879.176	904.527	1010.4	1035.91	996.572	916.558	757.847	790.337	905.787	903.797	1053.49	726.857	760.402	939.358	710.871	926.206	889.216	634.643	873.574	917.363	1141.58	673.908	680.637	759.378	539.663	828.742	802.184	847.104	674.199	730.412
evm.TU.chr1.600	2067.23	1966.98	2038.57	2173.68	2130.13	2048.92	1980.39	2166.29	2187.52	2140.89	2369.93	2050.4	2336.74	2310.02	2260.11	2369.17	2318.66	2019.98	1865.19	2166.97	2605.53	1919.45	2160.96	2294.4	1859.2	1997.03	2095.8	2166.19	2013.3	2063.05
evm.TU.chr18.180	1634.91	1499.63	1335.13	1392.46	1456.28	1358.15	973.126	913.554	1004.82	1065.39	1070.21	836.656	931.895	873.799	984.681	1086.85	1029.74	889.7	912.624	1242.58	1075.65	895.023	951.019	1072.9	803.355	958.699	909.472	960.321	893.75	799.51
evm.TU.chr23.38	355.526	347.308	363.883	355.631	341.536	320.38	222.799	267.137	242.575	261.167	265.746	247.608	218.951	213.819	205.901	233.334	257.953	200.046	266.54	306.522	305.191	199.606	203.983	236.788	153.861	293.187	265.287	259.197	213.239	227.452
evm.TU.chr29.85	1016.06	933.838	750.526	247.662	210.998	228.965	2089.55	7551.32	3561.08	9485.35	13014.6	19593.1	837.73	334.208	247.44	656.086	1779.11	703.382	570.555	650.331	203.107	308.204	1789.1	825.416	0.510105	15907.9	6557.23	4121.84	8655.26	4753.79
evm.TU.chr1.115	855.396	842.217	868.807	880.177	862.755	878.527	447.941	474.534	468.394	523.801	600.449	476.032	408.598	443.701	383.05	515.479	561.679	423.109	523.658	685.546	520.545	399.035	434.858	531.881	306.475	669.844	434.346	499.452	439.524	449.44
evm.TU.chr20.38	1119.86	1112.41	1289.65	1521.78	1323.49	1364.6	886.345	1121.4	1073.8	1065.75	1307.7	1089.52	870.062	1046.86	780.06	965.583	951.557	777.242	942.368	936.405	1062.2	715.787	688.859	873.29	622.688	950.962	942.78	947.497	738.788	836.288
evm.TU.chr6.298	169.724	168.205	181.525	181.476	172.612	176.717	98.3579	93.1549	89.0598	87.2178	88.2898	85.4296	78.7032	84.8244	73.212	76.2644	67.8904	82.4974	117.26	112.78	106.467	85.46	74.7531	83.9908	68.4141	95.3482	79.0471	86.422	68.7042	80.4613
evm.TU.chr12.321	1454.58	1370.32	1543.54	1772.93	1515.33	1635.79	952.273	1115.86	1009.82	1177.48	1316.09	1145.8	832.494	1024.66	822.202	1047.55	1046.52	825.623	956.943	1066.63	1154.73	853.776	875.977	1041.07	647.38	1131.87	1009.07	1056.31	809.69	895.304
evm.TU.chr27.269	868.414	817.403	754.861	699.822	706.393	768.436	690.888	691.932	695.326	701.845	962.88	729.741	1088.03	990.232	1084.87	998.203	1149.93	959.029	552.596	670.049	482.787	705.397	948.546	902.553	621.648	616.198	489.917	620.386	631.093	499.606
evm.TU.chr4.989	32.2689	33.7329	37.7065	65.5532	64.542	59.7912	235.107	226.688	260.563	359.325	352.545	259.51	496.335	395.107	529.936	469.025	431.322	466.393	237.762	209.786	309.624	285.74	278.5	234.657	438.42	132.525	254.561	250.007	321.563	326.599
evm.TU.chr3.297	435.276	437.492	429.65	383.62	330.367	375.594	963.284	1721.53	1985.94	785.803	1032.03	763.455	1591.23	858.961	1111.47	920.883	888.278	784.638	1518.37	1545.93	1766.57	902.51	1167.4	1150.52	6063.18	2074.3	7857.7	2400.13	2315.62	2499.43
evm.TU.chr29.2	3030.2	2637.49	2961.55	2909.33	2740.42	2951.81	2047.44	2445.95	2343.98	2430.42	2722.59	2377.59	1884.05	2231	1669.17	2225.93	2056.58	1818.69	2124.23	2524.08	2947.01	1750.69	1706.18	2069.03	1697.99	2450.92	2555.44	2296.28	1845.91	2049.01
evm.TU.chr30.68	48.5219	49.6866	53.149	45.2746	52.6899	48.1662	91.2867	95.5712	76.78	90.9691	98.1993	91.6763	96.7057	79.5818	85.2573	84.0586	107.498	68.0949	55.3093	46.6156	41.7129	76.666	99.4576	88.8239	61.7719	33.558	40.8464	73.8221	55.7365	77.2504
evm.TU.Contig153_pilon.6	6421.19	5267.41	5981.5	3134.84	3515.5	3621.62	3147.22	3473.18	4221.07	2448.08	2169.96	1863.7	4057.37	3492.26	3004.91	2391.68	2057.62	2655.29	4797.53	5006.08	7089.19	2400.34	2701.22	2424.67	3494.56	3397.8	4289.51	3082.12	2560.2	3994.52
evm.TU.chr1.1017	1046.76	1013.25	1141.5	1855.87	1499.65	1606.7	1567.39	1746.95	1756.69	1933.79	1566.51	1505.6	2087.33	2429.59	1951.21	2507.44	1855	2000.48	2921.63	2102.55	3566.88	2928.43	2124.78	3216.64	3178.57	1082.51	2462.57	2648.78	2361.73	3196.01
evm.TU.chr3.1350	1280.8	1241.1	1163.6	1330.38	1165.96	1228.28	1042.48	1066.71	956.189	1111.79	1241.36	954.838	982.498	1018.62	924.929	1225.53	1204.12	972.132	976.256	1216.63	1312.84	984.248	929.118	1035.22	684.492	1065.7	926.199	1041.04	1031.75	952.147
evm.TU.chr30.54	1009.3	924.289	939.659	716.259	758.336	790.419	432.577	443.2	509.384	353.726	331.103	336.648	554.249	474.514	522.223	496.908	444.756	519.442	801.71	1016.6	962.632	444.007	392.295	471.681	490.619	769.077	587.042	525.195	589.904	538.933
evm.TU.chr3.1463	177.548	194.998	204.241	295.791	250.789	257.413	466.179	477.858	467.845	689.892	644.689	610.197	426.07	503.674	498.562	652.619	597.779	557.447	367.742	296.676	435.452	522.761	467.816	478.218	421.749	259.426	448.563	495.279	485.873	590.689
evm.TU.Contig153_pilon.7	4941.16	4346.56	4475.18	4041.46	4291.72	4067.64	3026.2	3437.88	4030.25	2937.56	2948.62	2512.66	3479.23	4192.28	3592.18	2937.41	2655.78	3357.14	4513.28	4376.6	6752.85	2438.54	2319.2	2622.26	3124.7	3579.94	4175.04	2991.17	2698.74	4137.5
evm.TU.chr5.265	791.412	725.197	712.582	843.251	903.793	756.143	334.563	437.619	296.847	318.808	424.711	419.686	428.4	401.544	438.121	445.378	394.483	369.147	1004.18	1317.18	778.101	492.246	275.206	520.202	789.053	747.278	570.368	688.829	865.874	878.663
evm.TU.chr6.602	848.136	761.825	915.753	1088.4	1061.98	1098.8	567.949	746.243	692.325	810.102	867.596	678.27	621.755	896.584	609.645	788.586	826.685	704.207	727.751	655.727	949.054	410.536	608.539	675.173	540.724	638.463	771.29	737.276	546.894	551.341
evm.TU.chr11.430	21.9577	47.1148	43.5198	58.7958	62.88	54.0174	622.486	353.591	391.967	722.823	421.024	585.959	161.533	116.119	98.6061	89.3754	122.712	71.1118	297.668	213.841	346.275	437.113	394.022	442.189	202.132	36.2385	202.025	144.35	112.731	107.757
evm.TU.chr29.93	213.424	474.348	87.7216	7.94012	31.4027	28.36	2266.79	6319.55	10229.2	221.52	310.852	82.3509	10.6294	7.9859	0.537499	0	0.240338	1.52252	118.71	470.941	5.29476	2.10956	1.35881	0.854064	0	7550.77	3015.05	908.441	2337.97	468.047
evm.TU.chr1.2439	2161.06	2128.81	2336.5	2628.94	2253.89	2479.09	1584.21	1780.37	1694.17	1828.31	2212.33	1705.34	1585.61	1892.16	1591.51	2164.87	1997.16	1792.87	1716.12	1824.42	1982.26	1434.9	1507.15	1640.13	1286.99	1905.72	1636.56	1782.02	1498.35	1630.52
evm.TU.chrZ.197_evm.TU.chrZ.198	493.674	515.216	657.212	866.562	701.956	723.208	383.316	536.056	895.958	956.831	624.796	855.462	624.84	889.616	652.052	474.383	434.743	393.365	535.917	466.612	665.207	644.371	665.125	407.19	472.335	546.956	479.551	542.421	614.485	450.439
evm.TU.chr8.411	78.144	82.3575	83.3228	77.6193	82.4564	80.2924	172.771	170.935	168.991	163.045	157.679	140.602	376.738	341.351	422.474	376.871	360.107	457.605	149.651	123.747	105.374	206.982	239.983	193.002	190.693	69.6871	112.913	145.934	174.05	176.154
evm.TU.chr29.109	14.857	8.14875	12.6434	1.0298	2.38802	7.18746	933.453	1747.58	323.645	4411.55	7291.14	5981.18	1264.38	275.13	292.427	503.392	1028.69	761.695	290.221	39.1642	23.703	403.09	1822.46	1337.69	0.409215	338.222	118.192	921.305	2008.01	1349.46
evm.TU.chr5.22	7524.91	7804.64	5852.17	10915.3	5883.51	5903.16	7001.56	5750.88	8854.35	2466.91	7786.1	4227.83	2623.72	6624.97	3057.1	3766.7	4630.14	2870.59	7707.3	5409.08	8729.6	3165.13	3007.62	1063.01	2012.97	3656	6382.99	6848.43	2443.56	2735.17
evm.TU.chr2.112	429.045	471.36	471.125	513.472	504.024	517.525	315.139	340.416	340.45	336.352	480.07	358.329	327.03	396.731	311.392	395.411	348.057	283.365	351.734	398.528	395.61	286.545	292.486	335.629	245.981	392.219	339.783	333.35	276.487	311.165
evm.TU.chr2.922	410.464	439.897	396.304	461.446	462.903	440.631	352.435	365.419	394.762	423.274	437.465	385.814	312.383	354.355	333.291	368.894	386.159	291.22	355.169	403.614	447.969	315.569	305.971	362.444	258.837	332.276	319.432	324.141	270.443	287.733
evm.TU.chr21.194	3361.96	3246.09	3493.47	3694.9	3000.16	3533.88	2610.46	2574.23	2814.13	2658.11	2963.04	2758.32	1807.77	2091.28	1668.11	2212.7	2537.77	2038.79	2290.32	2675.13	2990.37	1735.44	2256.98	2325.26	1308.7	2783.4	2502.9	2583.66	1927.41	2104.45
evm.TU.chr25.286	96.415	104.951	80.7374	107.09	103.279	95.5133	615.525	609.45	560.135	883.103	1223.93	536.417	2581.49	2520.62	2807.7	3962.81	3297.88	4045.91	1324.19	1145.67	2792.85	1734.44	2057.51	1061.24	1006.45	334.586	334.672	1456.2	1764.24	2039.79
evm.TU.chr11.23	1594.73	1559.64	1526.86	1687.98	1470.14	1601.84	1212.6	1196.01	1121.69	1229.43	1340.78	1129.92	892.996	1184.59	934.274	1167.32	1183.48	919.861	1248.26	1522.43	1538.27	905.47	847.822	1148.91	706.273	1266.05	1108	1116.16	1031.11	963.102
evm.TU.chr25.105	1231.99	1109.79	1201.45	1170.98	1021.98	1130.15	699.63	928.59	831.866	757.273	952.626	691.339	884.265	986.344	909.261	930.768	973.449	894.218	836.276	1033.95	1059.23	668.141	668.04	840.106	729.53	951.504	896.987	882.978	714.085	751.245
evm.TU.chr27.62	316.376	338.925	344.82	379.762	343.504	353.877	233.433	205.382	211.704	204.368	254.828	214.095	133.181	141.793	112.684	84.0152	74.9706	140.18	143.141	123.245	127.325	106.278	164.301	97.0224	124.006	179.694	159.143	113.155	103.891	118.645
evm.TU.chr14.64	303.486	350.971	315.671	311.77	348.933	338.277	560.526	563.866	461.305	548.327	699.747	624.949	529.023	624.868	557.223	613.446	562.694	608.493	409.046	412.741	431.81	525.872	537.811	512.168	793.828	501.121	652.552	527.332	765.939	626.228
evm.TU.chrZ.838	27.6288	25.6393	22.472	28.8876	33.5352	26.046	247.213	217.977	231.552	401.077	253.191	352.093	160.04	219.755	273.998	260.166	251.122	223.814	186.345	137.04	192.986	262.372	199.191	219.917	88.379	43.7532	105.414	112.353	100.015	73.291
evm.TU.chr29.115	8.4681	21.5063	6.29867	0.42573	1.09418	0.336048	993.318	1699.83	2590.51	123.34	73.4308	90.9702	1.24403	1.22256	0.915017	0.0550519	2.71057	0.95787	13.5179	29.4892	0.8127	0.264061	1.36069	0	0.229593	6913.48	4119.32	1756.49	3256.11	1996.1
evm.TU.chr5.268	68.3933	70.0514	64.8504	56.1159	58.9786	54.3379	60.3824	58.6401	57.9905	51.5385	51.3641	44.0515	65.1349	59.4853	71.5872	66.9004	62.7907	70.0173	59.3555	61.1283	49.9591	57.7579	58.5706	57.2836	74.175	49.8818	53.8357	52.7741	51.8223	58.7789
evm.TU.chr17.298	116.667	103.805	97.755	127.951	131.329	151.741	560.827	536.763	658.509	797.421	673.458	476.107	2039.47	1985.92	2581.13	2067.96	1595.21	2821.57	1215.13	1011.6	1973.66	1821.96	1625.23	1147.54	719.951	189.971	136.549	963.341	1598.46	1526.86
evm.TU.chr26.143	2108.8	2003.42	1909.48	2235.24	2061.33	2048.57	1134.84	1346.48	1169.97	1201.83	1385.71	1207.44	1035.18	981.541	909.478	1202.96	1208.05	1072.6	1173.2	1588.01	1460.22	1008.08	1089.4	1384.78	958.283	1568.23	1314.74	1250.28	1074.8	1157.76
evm.TU.chr13.449	95.1335	107.543	106.05	176.33	166.368	165.697	263.936	389.077	221.131	302.882	277.864	265.183	238.367	276.734	210.826	361.499	428.047	291.02	220.754	211.503	292.091	421.788	432.075	370.884	243.894	229.838	315.42	477.39	511.611	568.347
evm.TU.chr1.2603	16.4099	16.8064	12.3822	22.8686	20.7587	16.7458	335.841	348.24	408.973	296.356	217.908	203.017	527.821	502.218	530.166	391.59	357.88	445.441	292.044	265.871	373.376	409.797	378.068	282.916	417.144	118.972	481.706	347.5	242.847	352.868
evm.TU.chr9.390	59.9467	48.3594	49.8485	98.6219	78.3357	73.1486	303.937	206.751	276.869	271.023	191.681	215.8	404.942	333.223	324.318	263.748	233.738	372.313	257.194	208.48	315.564	304.482	214.489	217.83	242.403	197.026	208.132	368.306	273.503	609.854
evm.TU.chr10.264	525.471	537.153	568.143	450.897	499.795	470.737	232.27	279.629	282.857	267.862	303.206	245.928	316.979	320.322	285.584	307.039	308.127	293.825	319.203	386.199	302.73	210.656	276.988	281.301	237.253	305.311	250.368	266.166	228.88	251.428
evm.TU.chr16.250	2687.19	2628.84	2741.03	3129.79	2802.55	2745.72	2209.35	2391.11	2173.06	2450.03	2677.61	2147.91	1756.07	2102.96	1750.04	2450.61	2382.44	1871.78	2198.97	2334.04	2538.66	1856.59	1879.89	2173.28	1456.11	2147.62	2034.28	2156.69	2016.75	1944.32
evm.TU.chr16.368	254.682	241.882	246.955	214.784	213.397	227.884	126.965	131.712	123.983	128.339	166.464	118.755	172.622	175.462	165.797	182.498	195.896	174.783	136.984	166.626	127.332	114.549	139.55	146.169	114.808	200.654	150.196	154.397	143.858	125.062
evm.TU.chr23.53	30.1179	32.4129	30.5708	34.4037	37.5941	34.2777	34.213	33.1688	32.5054	27.4292	35.8982	32.9316	36.2181	30.9589	32.8606	34.6599	30.8427	43.204	30.4613	30.563	27.4928	31.0159	32.7398	30.2747	51.7214	33.6621	32.1307	35.855	29.5262	35.0932
evm.TU.chr4.1118	1527.48	1680.61	1786.55	2017.75	1632.87	1781.23	1325.25	1547.35	1433.7	1504.62	1737.81	1353.89	1227.24	1635.24	1250.38	1369.97	1580.67	1212.4	1403.7	1468.53	1611.13	1251.42	1132.42	1198.83	856.79	1351.44	1305.36	1402.21	1181	1250.83
evm.TU.chr1.1925	55.0473	68.5184	61.1569	75.2558	81.0511	79.673	89.4917	91.1657	86.5105	96.3132	90.3885	77.6626	180.82	165.836	204.668	189.831	144.392	236.087	190.651	157.145	203.699	172.869	179.558	140.813	235.164	92.6826	143.082	155.251	162.224	171.375
evm.TU.chr1.1723	205.221	204.805	210.42	165.254	156.602	193.084	341.295	319.854	320.029	428.817	381.591	314.577	340.58	350.952	344.311	302.725	292.294	344.6	210.048	210.907	296.188	252.054	273.527	203.424	199.105	202.551	219.531	274.904	254.037	302.801
evm.TU.chr18.304	13.6188	14.1857	12.6004	17.1135	19.5843	16.0945	47.6558	48.0889	51.3333	60.2607	66.9844	49.9612	145.743	145.189	199.785	181.053	158.594	222.843	102.198	71.9293	143.619	107.835	138.106	76.8744	39.7888	17.3161	18.4336	66.0847	101.464	83.1856
evm.TU.chr6.89	61.1417	80.6843	84.6259	103.108	107.088	85.0353	296.753	209.166	254.959	281.802	187.272	266.032	117.464	106.475	116.145	104.947	136.139	116.142	167.747	125.648	123.129	236.34	215.851	217.948	126.273	57.0889	112.185	155.071	133.909	112.896
evm.TU.chr23.14	97.9734	92.9791	95.1018	106.952	106.795	107.079	123.46	112.194	115.341	105.228	96.8142	92.2069	136.008	123.055	129.049	112.339	93.9322	121.973	135.194	126.42	135.344	127.705	119.972	95.8739	199.767	110.85	118.052	127.187	137.138	129.676
evm.TU.chr1.895	1139.48	1133.34	1139.57	1268.87	1196	1214.3	720.014	825.196	795.659	801.074	849.752	806.182	639.495	689.156	597.712	656.074	703.667	544.171	766.694	902.303	991.145	568.307	608.041	712.651	544.384	983.141	845.92	853.927	741.243	759.316
evm.TU.chr2.177	676.192	671.05	713.883	672.01	676.418	721.814	248.158	227.747	195.478	167.908	179.308	207.26	172.893	166.978	161.12	142.798	156.562	168.2	296.147	356.497	184.804	185.264	165.832	178.765	191.08	592.54	271.822	352.757	372.655	314.002
evm.TU.chr5.58	68.2654	45.8801	52.6488	54.3415	57.3555	53.3592	264.294	228.722	281.488	333.634	248.129	270.207	241.416	207.121	300.846	317.256	319.06	390.83	254.252	207.53	239.533	295.873	337.951	278.721	77.0195	57.5579	38.9587	157.574	162.452	177.881
evm.TU.chr3.507	88.571	89.0165	91.8339	60.0121	59.2908	53.6638	79.517	85.3999	87.8535	78.2111	83.9557	61.2534	130.718	120.681	127.301	160.158	169.353	143.35	77.8213	69.3377	57.0907	106.248	169.366	100.003	100.245	30.3024	56.2068	72.1121	90.8737	71.3768
evm.TU.chr5.1032	626.317	621.458	659.044	674.57	603.401	605.404	389.786	472.115	433.398	456.902	479.37	428.868	431.019	553.04	414.745	494.435	484.649	398.87	490.012	579.896	676.208	392.057	359.075	431.373	397.261	578.381	652.708	465.56	364.106	406.484
evm.TU.chr29.4	382.942	379.382	378.192	379.764	356.145	351.729	351.114	406.803	345.019	412.391	378.685	335.635	403.174	441.592	381.036	401.195	416.588	485.975	452.257	451.78	445.949	387.335	350.754	397.06	422.622	368.419	362.784	419.939	401.823	475.168
evm.TU.chr31.60	1486.41	1333.44	1257.17	1240.04	1247.14	1240.78	934.745	878.704	940.971	941.119	1112.48	910.776	855.676	914.698	876.12	1003.94	1036.27	896.945	871.02	1082.86	1014.62	713.271	790.187	1009.11	722.822	937.477	852.44	850.243	731.605	768.172
evm.TU.chr28.117	4873.11	5162.03	4923.94	4597.96	4353.29	4697.99	2269.56	2603.18	2738.22	2638.61	2144.67	2320.58	2040.02	1815.21	1971.08	2396.1	2136.96	2245.16	4044.43	4815.52	4723.93	2546.93	2125.52	2386.17	1806.66	3107.94	2450.46	2493.68	2366.38	2474.64
evm.TU.chr24.168	523.746	445.55	439.964	488.031	554.388	462.296	187.265	268.176	226.758	178.398	186.854	223.314	274.054	270.126	293.051	236.412	227.668	209.918	602.994	823.392	507.165	333.856	166.271	363.51	597.279	425.016	456.968	549.583	458.418	693.039
evm.TU.chr8.90	103.556	82.538	81.2278	148	123.598	137.285	222.909	247.883	258.972	285.834	243.895	380.097	247.804	249.489	186.495	337.918	935.458	342.076	562.346	124.087	284.742	598.528	267.812	376.997	178.803	135.705	207.395	185.244	221.78	216.964
evm.TU.chr1.2191	419.426	406.135	393.423	345.48	358.636	363.536	335.836	461.141	406.16	383.914	342.485	436.598	390.801	395.256	419.329	345.323	352.674	347.155	444.4	590.708	528.473	441.077	355.351	513.071	399.134	552.104	574.133	546.71	428.949	458.348
evm.TU.chr5.916	160.475	152.53	160.66	180.192	179.425	184.738	172.127	161.291	160.402	179.391	141.577	141.971	256.753	249.468	260.977	219.457	170.146	264.891	244.633	224.135	291.272	254.495	221.351	192.476	195.932	136.036	114.172	216.88	260.774	287.983
evm.TU.chr3.672	108.65	108.593	105.719	108.281	107.401	113.751	108.107	88.616	101.794	107.904	93.8103	94.8512	139.109	128.405	160.539	143.215	127.307	164.7	177.165	142.553	162.39	173.414	162.694	144.654	101.953	87.7034	97.7187	138.48	155.021	137.372
evm.TU.chr14.8	73.1398	74.1427	76.0053	78.1957	77.1636	78.2209	98.9463	119.952	96.938	94.8041	81.4218	77.3952	180.019	157.758	133.437	102.252	98.585	131.574	147.886	131.767	126.257	136.86	109.555	125.052	195.751	83.5616	123.131	197.651	141.461	210.605
evm.TU.chr5.186	259.261	283.456	302.184	237.357	284.712	254.302	268.576	279.991	239.975	255.661	332.273	357.295	271.463	263.226	244.604	327.983	290.502	306.626	268.509	295.318	271.645	213.93	236.631	222.472	341.4	965.311	497.732	452.434	572.718	672.855
evm.TU.chr1.116	74.2709	72.665	65.174	107.272	103.332	78.6699	254.716	204.61	131.562	183.32	243.755	178.189	110.842	110.411	107.427	135.786	138.498	95.2445	248.695	236.152	278.952	261.39	192.877	178.613	151.972	48.7165	70.9936	122.769	120.19	141.68
evm.TU.chr5.233	289.608	322.492	343.825	179.088	172.007	161.688	459.369	395.169	352.468	458.722	427.802	388.255	458.438	443.055	543.327	542.065	392.145	764.541	634.93	522.358	772.286	593.004	646.161	445.888	132.217	778.695	313.68	545.358	773.201	704.116
evm.TU.chr7.302	491.758	479.244	555.881	419.004	403.454	420.855	302.99	320.255	291.214	318.719	241.7	292.523	256.527	303.115	271.975	249.778	232.572	274.457	474.744	498.138	521.092	419.683	263.55	367.153	210.249	517.323	328.094	447.343	432.218	461.768
evm.TU.chr25.120	1637.47	1497.06	1590.45	1473.14	1347.43	1411.75	936.496	921.24	962.862	853.842	1035.22	776.99	823.713	890.979	749.608	1164.57	862.163	767.005	1100.42	1295.78	1262.15	710.126	796.906	892.474	677.762	1133.12	885.927	855.282	876.994	835.808
evm.TU.chr2.1113	91.8435	93.8777	82.3801	143.7	121.338	132.549	162.52	192.884	168.875	152.653	130.357	158.761	239.785	264.263	250.86	185.775	171.322	181.38	169.568	158.717	195.208	193.263	183.882	181.562	386.474	122.722	342.62	234.588	231.858	216.094
evm.TU.chr37.4	417.622	382.042	451.878	360.129	379.859	371.931	364.158	420.503	385.409	307.918	267.247	339.704	193.552	208.445	154.728	245.081	206.955	199.903	404.123	550.845	644.668	262.31	166.327	275.437	299.311	244.681	267.53	367.829	304.21	406.648
evm.TU.chr27.407	941.201	886.825	951.026	970.17	866.46	847.952	1159.81	1112.47	1016.25	1214.46	1069.94	1077.7	1422.68	1421.89	1633.1	1558.02	1456	1557.92	1494.23	1384.52	1678.14	1401.28	1369.56	1355.84	1564.78	1165.38	1736.88	1828.54	1863.9	2063.83
evm.TU.chr16.236	17.8915	14.8544	15.8121	18.1935	16.1153	17.9259	72.7609	72.7596	74.3713	89.4169	89.1075	74.1055	127.57	139.41	167.246	146.029	96.9659	216.749	119.815	78.1573	197.578	114.31	140.685	78.5206	47.7691	26.7997	18.4995	76.8036	117.65	94.5766
evm.TU.chr5.913	138.172	124.589	122.341	155.416	170.972	143.303	196.563	243.45	197.919	218.413	246.392	309.098	456.063	385.384	399.658	423.659	697.215	297.641	394.151	259.221	261.922	398.616	365.339	521.222	454.556	268.497	298.588	430.674	428.831	517.036
evm.TU.chr11.469	59.4078	61.9822	66.4146	83.0643	83.3812	80.7789	140.915	100.051	116.386	154.485	113.812	127.116	52.1201	47.9871	52.8344	56.3141	53.387	44.1524	90.9525	61.1785	86.7535	81.4243	63.9998	71.9761	57.4284	27.2324	46.3777	57.5121	61.8815	48.8828
evm.TU.chr2.477	137.674	142.881	155.914	145.302	161.608	159.24	114.741	81.8179	35.0402	96.0155	182.672	145.841	36.4087	21.9316	27.5389	35.6359	54.1727	48.0459	46.0294	58.1875	18.6561	30.7748	63.9643	44.9578	1.47115	160.581	61.3626	100.68	105.074	101.388
evm.TU.chr3.878	58.7691	77.8031	86.7057	66.4655	81.3591	73.0825	94.8936	75.4056	88.118	98.851	59.1774	96.7788	50.6638	35.8491	24.0777	27.9433	40.811	26.0687	32.737	25.2132	23.6505	39.668	39.9598	41.3808	70.8766	22.2933	40.7832	28.7177	25.8061	31.6774
evm.TU.chr21.242	680.657	638.144	682.888	670.964	650.51	653.169	345.266	369.986	387.389	339.197	287.921	321.283	314.51	310.052	324.641	258.299	254.583	301.913	418.334	513.755	455.172	299.33	253.233	272.839	339.065	423.419	392.522	356.656	334.172	351.843
evm.TU.chr15.181	136.052	130.248	115.898	156.083	147.574	157.123	311.922	331.074	370.68	355.845	239.636	253.47	286.943	241.504	266.132	256.928	246.04	287.811	356.998	290.012	436.974	341.315	279.878	300.487	216.33	68.9093	138.501	202.435	179.698	219.842
evm.TU.chr1.2060	145.758	148.467	145.921	149.603	140.273	140.21	140.223	133.268	119.606	105.751	103.83	104.73	82.6739	76.8956	61.9514	91.4153	78.4029	89.4942	153.495	226.465	223.583	116.3	59.2242	112.141	116.214	74.6047	82.5988	126.399	144.204	179.899
evm.TU.chr3.1408	286.212	285.187	288.919	269.862	273.828	277.863	158.057	154.219	140.081	152.929	131.722	138.195	166.389	165.746	169.866	161.683	145.001	168.162	214.736	248.579	219.409	180.956	165.238	164.12	146.222	263.915	198.115	224.119	207.097	209.636
evm.TU.chr10.256	788.081	940.387	884.67	810.201	841.998	806.881	365.601	424.814	442.537	432.966	426.475	395.836	330.704	417.959	302.983	319.051	336.867	347.443	622.678	739.454	711.249	312.428	290.159	316.137	230.045	531.254	340.634	425.242	290.596	396.949
evm.TU.chr1.1527	343.27	342.695	332.446	356.521	320.071	320.244	242.856	259.985	228.705	240.149	262.878	231.797	182.579	215.891	179.39	241.012	231.227	197.519	264.798	292.236	305.492	209.069	176.69	223.463	155.27	274.637	254.307	260.671	214.164	218.569
evm.TU.chr9.259	101.018	98.4185	101.854	122.472	126.636	125.998	221.962	223.788	220.799	270.506	219.762	214.611	307.183	263.511	279.055	236.614	213.875	295.314	251.895	183.742	208.404	276.721	262.606	241.73	276.819	106.353	190.818	263.315	256.601	274.254
evm.TU.chr5.364	108.96	103.461	101.703	107.088	113.13	111.27	138.383	193.107	176.368	138.334	130.357	130.201	188.442	194.432	243.645	225.075	188.845	229.77	193.743	179.891	223.757	212.188	187.794	184.638	237.481	89.5414	189.682	189.269	167.334	173.665
evm.TU.chr24.198	1408.92	1455.89	1434.03	1362.58	1215.47	1258.77	732.735	771.84	800.591	742.09	878.048	687.849	649.13	764.02	656.857	711.495	725.283	607.825	920.347	1163.88	977.319	586.422	568.532	736.388	526.319	1137.9	773.594	765.69	727.222	731.167
evm.TU.chr1.993	102.513	104.41	88.9383	131.991	123.112	109.989	251.888	270.314	264.428	295.507	239.575	266.475	354.683	349.546	352.304	300.43	271.605	245.272	299.638	229.623	319.366	439.803	402.197	324.625	308.235	140.037	364.094	436.518	326.687	425.024
evm.TU.chr10.270	2040.19	1923.09	2093.18	2178.45	1720.03	2037.18	1346.53	1413.59	1440.86	1454.74	1664.32	1350.51	1232.18	1403.86	1187.28	1375.38	1471.96	1191.21	1433.03	1736.48	1556.84	1098.34	1141.43	1295.84	889.122	1630.13	1273.23	1344.2	1274.76	1207.58
evm.TU.chr12.159	3.31419	3.03371	3.45872	4.19576	5.19844	4.54259	24.2283	27.7873	26.0987	45.4131	38.6297	30.0261	113.455	106.332	146.135	135.028	81.0621	153.326	70.0632	46.4211	92.3075	98.1235	107.059	66.726	35.3404	15.6692	31.4728	94.4967	118.408	108.343
evm.TU.chr5.580	358.554	323.187	375.686	273.179	346.079	290.163	599.329	690.879	214.103	378.254	533.572	725.505	266.208	203.056	214.545	228.989	275.3	226.741	253.371	251.881	118.216	259.689	374.151	302.688	195.867	528.271	247.15	594.729	564.14	689.175
evm.TU.chr2.1215	50.5619	67.0381	76.5291	72.2169	82.9114	70.4885	379.465	146.223	230.641	367.062	178.343	277.119	9.06911	12.9418	12.2101	22.1303	20.151	18.0902	27.5713	25.2354	30.7144	46.3907	39.4665	49.6765	19.3607	8.91482	19.0726	10.4543	14.5766	10.6103
evm.TU.chr27.308	3967.25	3787.42	3996.53	4319.57	3983.48	3993.64	2491.14	3218.05	3206.81	3324.96	3649.22	3120.25	2642.14	3103.83	2706.42	3516.67	3593.58	2600.49	3335.21	3672.76	4345.77	2325.47	2455.23	2734.13	1817.77	3363.22	2952.95	3080.95	2384.61	2685.77
evm.TU.chr1.2114	71.5379	75.6332	75.0728	78.6684	77.7564	86.7313	121.195	125.277	121.066	95.8013	94.5487	84.3657	176.805	143.343	151.023	136.68	132.518	132.308	154.379	146.275	124.605	119.457	106.616	140.109	319.101	91.6818	148.984	141.818	120.724	158.814
evm.TU.chr7.598	142.47	185.801	199.318	208.656	156.422	136.345	879.866	876.892	549.38	615.141	716.113	1112.3	162.564	71.2459	64.6037	75.313	134.741	85.1802	112.969	107.906	61.0735	68.6858	281.685	128.287	59.2544	1073.35	558.568	574.606	1000.62	557.269
evm.TU.chr12.379	150.933	136.309	152.27	150.879	140.099	136.421	159.656	161.05	156.973	262.158	258.601	181.22	371.888	375.146	587.479	417.955	417.814	750.849	350.573	229.456	429.257	365.394	512.539	332.915	83.1705	122.218	75.6342	425.303	698.953	630.407
evm.TU.chr20.30	276.998	292.292	301.517	272.666	292.618	250.728	282.66	315.192	274.224	222.066	209.013	263.02	151.263	190.26	129.23	136.71	134.822	135.067	351.322	540.431	452.449	185.097	94.4586	177.91	344.549	169.686	204.903	295.663	288.532	424.026
evm.TU.chr29.92	67.5397	160.905	33.0537	2.16972	18.3909	9.26466	523.868	7150.38	15714.6	141.945	49.5782	74.658	1.71266	1.0254	0	0	0	0.131274	9.19679	131.719	0.602457	0	0	0	0	2309.03	332.32	43.1685	559.196	37.915
evm.TU.chr3.58	115.495	116.975	126.701	120.063	119.921	131.776	141.258	116.206	124.426	123.884	131.675	131.475	159.068	143.436	143.438	123.211	141.257	122.252	109.632	91.0441	74.3244	126.41	145.705	144.461	197.84	76.2449	121.213	107.185	107.929	113.549
evm.TU.chr1.2147	3029.27	2882.55	2963.61	1891.59	1993.03	2024.56	1864.93	1994.05	1382.26	1676.01	1573.05	1754.69	567.597	568.365	413.354	581.365	662.142	481.247	1224.04	1417.84	1169.16	951.914	881.412	838.279	239.759	1942.45	1244.54	1473.94	1264.42	1232.41
evm.TU.chr1.2262	74.5081	73.1115	68.5663	81.0594	79.7828	78.0828	74.2482	80.9212	60.9976	69.9369	86.2605	70.5457	113.967	103.657	124.233	133.268	143.133	135.812	82.8082	103.585	98.5472	106.702	83.4829	89.1678	103.986	92.875	136.491	125.275	89.7103	103.665
evm.TU.chr8.33	788.33	775.082	813.726	774.168	754.387	767.878	393.382	473.899	443.394	382.994	383.569	377.6	325.58	342.419	302.637	341.461	350.695	350.671	470.295	543.358	414.434	325.879	287.229	333.228	323.809	708.746	484.654	455.644	413.853	484.581
evm.TU.chr20.11	13.4527	11.1346	10.1359	16.1408	15.3353	15.4085	84.5281	88.0565	76.6493	101.481	87.0246	91.2451	173.323	192.995	155.47	115.007	116.553	136.439	89.3643	68.9709	99.5806	139.763	131.621	96.9738	88.7889	35.0718	101.848	115.962	86.592	90.8461
evm.TU.chr1.2259	69.7747	74.0051	90.2069	168.595	168.307	186.253	502.433	336.082	377.468	803.141	488.461	708.828	128.617	121.936	101.949	167.371	217.955	99.3659	351.604	241.377	328.548	650.889	493.778	587.389	138.015	142.796	150.094	382.597	330.693	331.742
evm.TU.chr12.558	1185.27	1139.48	1160.9	999.507	911.197	1192.16	894.74	886.547	746.859	723.51	784.857	675.784	893.738	943.326	1039.71	877.852	851.229	807.296	960.482	1127.39	1146.33	922.096	691.88	766.572	802.819	758.435	865.966	828.048	969.452	992.396
evm.TU.chr30.56	1374.2	1354.75	1325.65	1242.32	1182.26	1220.04	629.776	671.113	698.207	572.168	794.903	681.023	576.615	672.44	574.306	664.222	702.977	610.54	633.015	945.085	754.258	469.277	509.323	569.351	453.2	937.31	719.512	609.947	556.569	533.941
evm.TU.chr19.259	351.55	372.784	400.473	362.025	368.064	383.592	181.615	222.116	177.896	175.597	182.022	176.069	451.691	493.038	488.86	301.895	301.715	404.069	299.828	295.604	272.085	331.964	324.179	349.931	566.052	413.324	495.103	496.492	392.798	409.172
evm.TU.chr1.2689	64.3053	63.6201	71.4756	54.1602	55.8294	53.2738	107.572	92.605	99.5417	116.344	120.805	100.405	82.6306	69.2606	76.4932	102.929	91.8723	103.912	55.9554	52.9557	54.7782	68.2663	80.4521	60.6447	43.9218	37.1794	27.9893	37.836	44.7989	39.1182
evm.TU.chrZ.384	6.54371	8.29606	8.07128	10.1514	7.1451	7.27041	58.399	53.5822	47.8097	63.7212	73.8627	44.9163	215.779	238.922	237.945	205.652	175.535	341.358	132.195	94.7115	167.704	144.364	201.565	106.656	61.1858	16.5637	8.36831	89.7299	178.261	144.113
evm.TU.chr2.1142	297.76	293.972	303.412	319.655	310.348	319.969	215.261	221.237	192.412	203.947	192.724	198.508	184.751	179.01	211.288	171.922	169.783	177.855	243.464	250.886	219.682	198.441	175.008	205.222	183.083	200.708	201.846	242.653	236.03	234.108
evm.TU.chr11.382	329.863	345.019	395.525	383.594	377.312	382.776	343.589	419.822	343.826	336.168	265.779	299.361	357.934	365.099	323.068	306.966	306.865	303.185	425.202	364.597	356.159	359.032	296.336	348.135	405.818	395.131	428.195	460.611	420.76	464.027
evm.TU.chr29.106	0.538819	0.557961	1.155	0.0386581	0.719152	0.366175	2.41679	0.852453	2.01693	0.432632	0.52254	0.532076	0.780473	0.284195	0.0474785	0	0.111456	0.0409311	2.47559	3.54787	0.214681	0.115094	0.642495	0.603531	0	4700.37	2935.52	1345.34	1603.97	810.587
evm.TU.chr2.126	0	0.0288018	0.0366896	0.0558746	0.0859677	0.00840083	234.813	72.6643	104.26	196.266	182.511	172.726	93.2132	69.0153	98.3174	285.45	252.255	79.6799	91.7185	25.6953	23.5155	168.743	67.6881	244.373	2.23843	0.946488	1.47366	14.2206	3.08553	7.0372
evm.TU.chr9.425	90.6952	93.2797	96.1237	96.0622	96.7327	98.9244	86.5429	85.0097	84.551	78.4694	66.3081	73.0444	76.1038	81.6841	68.7282	64.744	59.9824	66.1476	90.9305	94.0883	88.622	79.943	63.3565	72.6873	74.2715	92.9533	91.4143	89.8543	80.3976	86.3616
evm.TU.chr23.187	678.786	652.811	694.882	813.375	716.497	783.816	302.176	240.594	332.092	351.081	255.409	319.952	76.8284	76.4699	171.31	96.8371	97.2377	86.3794	316.006	307.31	277.748	159.126	175.762	160.114	55.3263	149.11	94.6443	124.63	99.4091	83.8119
evm.TU.chr12.315	697.43	683.211	653.025	638.641	661.042	655.899	808.388	702.177	696.904	695.362	497.528	635.83	302.812	262.331	239.677	269.475	238.485	257.888	875.812	955.955	1069.53	582.482	328.904	474.473	447.451	402.699	424.71	555.779	458.133	505.351
evm.TU.chr19.54	132.605	129.245	96.3572	89.4545	97.6116	106.031	277.785	349.885	317.4	291.255	229.887	326.357	294.77	248.084	266.886	286.524	340.792	215.748	304.579	266.31	320.243	386.343	338.503	389.083	395.945	196.032	335.801	579.704	346.405	483.635
evm.TU.chr9.33	227.474	229.6	243.854	253.628	231.084	251.559	127.067	134.173	131.896	118.862	123.156	115.709	143.156	157.928	156.406	145.002	124.21	154.674	196.206	221.682	217.975	144.243	120.542	132.519	146.372	178.424	148.339	152.138	135.745	160.531
evm.TU.chr4.458	60.5296	59.8417	60.2693	74.3255	74.8066	72.4163	103.859	72.7171	93.0355	111.718	118.534	104.981	45.183	55.4154	43.5384	99.9386	95.666	69.4108	56.8065	46.6038	51.5836	79.2833	93.2897	85.5437	34.0896	21.0215	22.9544	42.2026	50.8183	53.2682
evm.TU.chr4.224	94.3855	102.533	98.0513	99.7339	93.5238	97.9558	107.374	84.7808	94.6898	99.3013	82.0081	96.9732	82.7401	94.841	94.4698	91.5162	89.6553	91.3783	89.8793	86.0343	76.3352	93.7569	83.8683	88.0817	82.794	73.9977	78.6016	80.3439	78.2321	73.9599
evm.TU.chr4.582	28.4004	39.0562	32.706	44.0644	42.6188	37.6785	176.965	235.637	247.117	148.904	140.748	141.968	245.756	268.572	189.953	137.778	155.3	154.028	176.7	141.688	227.055	197.993	165.163	141.123	403.264	90.5311	390.24	190.045	169.748	202.517
evm.TU.chr19.26	363.76	390.054	380.032	366.863	342.539	362.63	487.036	455.942	384.349	434.112	345.795	446.505	208.984	199.895	165.676	187.559	192.489	168.661	456.214	411.326	393.053	327.61	283.681	294.01	259.571	376.856	283.082	393.926	342.425	350.587
evm.TU.chr25.407	314.613	311.458	337.995	309.889	315.417	310.315	194.306	181.53	161.117	163.084	174.185	170.107	210.488	208.481	211.993	219.263	204.001	235.024	224.009	224.577	179.447	190.576	193.479	194.056	186.997	266.75	195.054	222.825	223.973	224.32
evm.TU.chr20.133	87.7893	91.7377	101.976	85.0194	89.8422	93.365	92.1562	81.6442	67.3707	81.3493	87.0793	90.382	61.1569	65.9261	72.7662	49.0397	51.0413	55.5613	63.436	69.585	50.3284	60.5559	63.2001	65.5968	71.4196	69.8178	55.5864	71.445	64.3891	58.4121
evm.TU.chr11.365	297.752	334.953	392.366	516.958	389.423	404.205	257.436	335.113	278.066	356.81	414.409	278.931	212.069	252.913	188.926	310.458	310.325	231.68	284.69	324.117	365.248	218.831	227.857	255.585	156.374	338.188	277.264	291.823	234.697	238.13
evm.TU.chr1.2176	104.816	97.9117	88.9984	140.138	140.577	135.899	85.9328	84.3171	79.0398	86.9454	107.393	97.6578	92.7946	110.215	114.516	130.111	116.753	120.764	103.845	99.9706	95.0586	96.2094	117.07	107.796	161.404	92.0715	89.6162	106.872	100.721	95.2509
evm.TU.chr14.236	2020.95	2093.86	2240.62	2202.89	1943.12	2145.37	1212.06	1546.76	1367	1348.89	1595.87	1299.57	1142.6	1452.76	1155.07	1443.97	1335.78	1072.16	1566.76	1624.8	1826.95	1021.25	1067.29	1228.31	866.633	1845.63	1429.03	1472.48	1121.4	1294.92
evm.TU.chr3.357	77.2037	78.2287	72.4177	69.568	64.5438	62.7123	182.086	217.497	262.947	108.358	88.2367	95.6463	229.692	194.606	193.012	121.822	113.566	145.354	192.816	184.387	265.852	120.318	109.354	106.276	241.066	133.638	257.605	151.099	122.638	167.296
evm.TU.chr30.223	672.843	497.511	604.296	554.505	516.591	417.233	818.899	628.183	517.915	1029.15	1305.98	902.114	279.936	194.061	204.846	384.412	366.538	497.759	533.084	674.154	330.348	336.719	467.84	405.955	0.583874	1031.84	431.953	758.098	1367.31	1198.42
evm.TU.chr21.203	177.118	152.884	144.227	105.398	107.892	129.244	100.364	124.982	112.577	128.439	142.33	98.532	161.734	178.632	183.887	237.705	229.307	317.276	179.279	183.402	252.063	199.169	204.309	142.698	41.1134	179.497	101.16	171.794	213.306	220.95
evm.TU.chrZ.164	42.2383	39.204	39.3492	38.0987	41.8006	39.6257	61.3076	55.3599	60.5737	54.7571	51.0227	49.1172	73.395	69.0878	77.3112	67.3496	65.4876	81.9828	57.2585	53.4106	66.4831	66.8729	62.9154	61.4221	64.9877	23.9752	36.5959	42.3629	42.6905	45.844
evm.TU.chr12.331	292.448	283.465	299.238	224.998	216.961	216.49	326.001	328.411	309.514	348.202	332.487	340.443	291.819	264.66	275.289	268.249	266.386	273.463	348.435	393.602	334.783	369.896	284.793	370.785	252.553	391.334	300.394	460.386	414.957	477.901
evm.TU.chr27.153	1203.42	1262.18	1195.13	1199.39	1215.62	1124.63	886.179	1054.95	1115.08	1016.13	1223.08	992.496	1017.89	978.941	940.479	1140.43	1241.64	987.988	976.903	1233.12	1337.6	863.024	881.669	1069.73	896.368	1163.27	1203.55	1012.88	847.665	925.866
evm.TU.chr1.2158	312.312	298.028	301.183	318.216	326.351	336.294	223.524	218.768	235.83	254.689	314.078	261.376	238.411	257.05	242.054	264.442	312.998	273.72	194.878	227.124	206.923	203.24	271.609	258.104	132.862	239.692	161.383	203.566	181.484	165.903
evm.TU.chr23.94	16.223	19.3894	15.8782	24.5727	24.7092	25.4778	93.1927	85.7036	69.8948	109.317	123.154	128.945	40.8376	38.9777	44.5638	51.3913	49.9381	63.1692	56.724	52.0481	61.5948	79.4033	65.1322	70.4772	19.6262	18.7747	26.5763	44.7156	36.9171	37.719
evm.TU.chr16.207	2609.82	3556.36	4126.21	1628.38	2934.37	2670.54	1243.49	840.038	2036.41	380.274	273.466	488.684	193.962	409.881	260.548	144.541	183.195	196.888	1580.94	2202.06	1583.14	451.127	470.373	1324.11	806.322	102.978	469.977	177.004	76.5534	180.621
evm.TU.chr3.752	6.41408	6.92259	5.72008	6.45554	7.69135	8.1858	32.7795	64.2084	21.8412	151.324	104.037	103.411	262.854	386.096	422.788	653.66	799.869	1448.88	143.362	65.8241	179.627	389.563	351.156	502.175	209.515	29.9457	7.75199	489.34	552.01	511.204
evm.TU.chr2.1278	20.8212	19.376	16.3695	24.6088	21.3799	22.1366	75.1656	90.9514	86.8218	77.0145	97.3528	82.0976	185.318	150.505	149.357	149.888	140.659	127.779	51.7953	49.3135	75.3918	93.7313	122.166	69.4056	177.777	49.3755	141.372	106.9	84.3811	115.59
evm.TU.chr24.131	136.929	119.095	130.23	133.191	137.716	160.194	120.197	103.336	124.304	132.641	136.484	117.902	149.631	158.078	176.017	187.978	156.166	232.821	143.956	130.243	150.31	161.875	157.977	122.266	117.142	61.758	46.6527	94.6639	132.135	113.736
evm.TU.chr2.1197_evm.TU.chr2.1195	285.689	278.389	323.403	326.104	309.601	331.564	212.747	243.903	228.435	228.796	274.384	197.036	236.11	272.418	230.093	257.539	270.571	230.299	207.527	244.134	229.555	182.14	201.261	223.997	195.771	252.449	234.584	224.094	211.365	191.644
evm.TU.chr11.381	676.616	703.396	824.9	749.996	744.315	788.77	727.988	1144.7	814.693	914.814	1003.83	942.732	972.8	990.786	879.638	1146.83	1022.09	792.025	1059.99	828.766	868.306	1012.88	829.021	1134.27	1160.69	1263.24	1762.36	1638.32	1229.29	1511.87
evm.TU.chr29.234	301.298	291.782	265.965	229.104	255.895	280.007	665.303	918.691	760.721	493.212	454.587	436.404	1352.43	1477.23	1028.64	625.276	647.945	743.351	1010.22	1077.22	1256.28	854.458	533.817	812.27	2402.88	830.133	1947.16	1469.35	1308.53	1798.29
evm.TU.chr21.227	35.0356	46.4612	42.5619	93.9525	93.5456	84.3125	425.847	285.782	335.228	688.386	422.211	514.934	380.298	282.517	257.429	470.678	658.919	249.46	620.77	472.388	618.814	1272.21	1378.65	1469.75	471.522	161.349	456.411	516.088	484.111	508.15
evm.TU.chr3.299	824.162	848.304	764.694	713.013	767.752	683.771	620.254	613.004	569.941	630.382	543.45	513.914	642.783	631.59	673.342	692.574	632.109	765.547	787.473	855.037	873.588	707.68	670.463	656.694	556.343	810.238	611.608	787.127	771.659	734.953
evm.TU.chr1.1408	336.794	341.444	364.054	417.417	411.968	423.268	441.311	381.366	396.581	439.626	429.18	427.376	277.369	254.563	351.588	373.036	353.937	374.809	230.196	208.573	259.21	287.244	333.219	269.962	313.922	240.359	211.251	261.821	349.975	294.982
evm.TU.chr7.226	26.8468	20.658	22.9534	29.6721	34.0048	31.5865	130.648	114.506	143.245	178.967	166.732	148.085	199.691	223.61	266.711	257.189	195.134	379.393	227.296	135.35	365.867	223.867	281.748	170.828	7.1599	19.3671	4.81492	228.011	287.176	295.605
evm.TU.chr19.205	701.003	701.088	807.428	906.453	898.707	824.088	537.689	597.36	554.017	591.159	654.053	549.466	463.282	534.846	455.713	506.908	494.501	386.66	758.048	778.679	904.039	466.239	526.116	564.311	499.542	647.288	626.489	639.974	499.592	487.272
evm.TU.chr27.288	1629.77	1666.03	2020.84	2081.38	1743.67	1769.29	849.639	1053.53	988.007	940.472	1114.38	948.243	682.188	945.687	742.19	869.86	935.612	730.5	1044.32	1328.79	1237.86	699.244	636.021	874.202	619.507	1495.04	877.195	921.968	868.93	964.258
evm.TU.chr12.1	62.8233	59.7738	60.4911	60.3359	61.3019	61.7285	57.7649	62.566	56.4296	51.6536	55.5819	52.4203	71.2331	68.1982	68.3118	54.1812	52.2709	58.4571	67.4543	63.3365	58.4725	60.7421	52.9154	57.145	97.1737	68.6951	81.1721	78.2732	63.1343	66.8066
evm.TU.chr1.581	347.275	341.245	347.275	401.836	355.7	407.5	463.926	422.419	484.148	508.766	520.856	535.127	486.098	516.231	462.58	530.69	508.732	522.369	380.647	367.735	443.002	421.518	474.151	437.302	664.296	305.145	479.078	378.459	493.187	426.961
evm.TU.chrZ.654	4.82486	4.8351	6.15927	5.32844	4.70771	4.91113	25.616	33.1549	24.2072	28.9779	31.4928	23.4445	176.533	91.4327	175.203	253.367	208.825	118.61	58.7885	31.4635	34.1977	79.1788	69.3008	68.1976	210.384	28.0397	58.6314	66.117	56.1038	75.5507
evm.TU.chr3.1052	701.998	815.927	899.931	602.204	650.807	636.195	75.3904	115.137	54.0174	60.9963	61.2489	63.1767	57.2326	56.8696	53.654	92.4784	98.5903	65.1513	192.638	284.333	134.582	96.3931	105.218	107.617	64.4647	1121.81	366.731	300.035	375.862	247.193
evm.TU.chr3.275	28.5908	26.0857	31.7263	43.0768	44.9611	43.8838	71.1355	62.6842	82.1979	113.001	94.7777	73.7569	189.418	197.084	264.282	288.418	221.026	418.359	137.537	103.429	177.175	210.431	217.481	153.215	44.1479	20.1969	12.5272	79.7857	193.056	167.269
evm.TU.chr2.393	109.197	109.886	109.842	135.528	127.867	132.259	134.21	122.402	125.476	129.416	108.16	115.535	105.822	103.443	108.58	110.125	101.599	117.981	134.54	122.885	140.676	131.435	117.184	118.685	109.161	96.7136	97.7648	116.405	111.675	107.191
evm.TU.chr12.13	308.315	302.826	284.622	274.714	260.721	262.716	258.835	269.353	247.414	235.836	197.646	206.064	168.671	157.627	153.518	182.841	163.799	182.874	350.23	394.628	439.414	219.756	150.547	192.314	196.694	191.328	177.456	271.515	234.66	259.402
evm.TU.chr29.178	72.0377	69.0417	87.5709	79.9325	72.0487	72.0554	137.342	147.864	140.574	116.905	119.634	109.535	240.124	247.786	219.745	175.678	212.644	233.268	164.473	129.696	178.3	160.924	125.809	133.512	263.142	147.463	238.121	204.529	151.753	217.221
evm.TU.chr25.211	92.1149	88.0595	91.1531	113.442	123.87	126.483	291.629	193.01	294.644	317.652	263.937	311.939	85.4907	62.2244	66.7444	128.987	139.953	112.906	125.108	117.915	139.056	136.679	145.654	124.975	104.258	50.4578	119.885	79.8432	78.4889	65.4521
evm.TU.chr3.1315	28.014	38.137	30.708	86.7737	83.1256	76.9524	40.1287	47.3661	28.7106	50.3073	49.4593	49.1136	20.1466	20.3596	17.7499	15.1874	16.7215	16.6913	17.3133	19.9015	24.7151	23.1908	28.4648	22.5204	27.306	19.3052	18.8229	31.3641	25.8518	27.4565
evm.TU.chr5.595	93.3346	97.4611	90.0975	122.468	122.514	128.371	266.116	256.47	253.404	361.86	307.111	274.327	408.909	451.826	433.326	475.685	484.254	516.198	272.137	175.493	213.765	440.453	527.95	406.579	329.122	120.173	267.929	363.185	335.271	365.577
evm.TU.chr2.1320	162.855	153.921	157.905	108.567	116.948	124.791	411.221	362.254	383.273	178.326	260.227	250.864	127.395	164.956	90.0371	98.5263	130.883	103.392	105.963	113.487	98.8664	83.3562	138.748	143.861	42.1756	347.142	291.424	228.857	263.395	166.743
evm.TU.chrZ.82	331.1	310.448	343.346	304.388	275.138	295.355	171.769	189.721	298.61	239.299	115.263	204.533	289.39	274.597	300.415	155.791	135.457	143.309	284.124	298.897	295.634	322.857	282.266	150.432	251.545	276.017	166.138	167.804	337.655	193.858
evm.TU.chr3.992	14.6797	10.9861	14.202	19.2001	19.4376	21.1491	60.1576	130.543	64.0938	85.5531	82.5197	79.6384	275.741	181.336	290.183	163.682	359.492	320.45	158.089	83.3519	137.137	230.41	70.3986	148.258	319.381	80.5856	114.243	110.077	161.615	161.862
evm.TU.chr15.105	64.1524	73.0386	58.6428	76.4364	74.6735	64.878	220.352	330.459	171.12	494.997	174.542	231.516	85.1248	109.452	110.708	96.567	67.3141	85.5162	113.797	62.4	84.7755	179.304	153.999	166.471	53.8904	13.9546	35.7669	133.679	77.6265	45.0188
evm.TU.chr7.204	79.2751	70.5999	71.0972	56.229	56.9037	55.9146	95.6821	88.4306	59.3829	98.4255	165.375	99.0058	56.0737	39.9019	50.4831	55.7898	53.096	72.4067	52.898	50.04	33.7674	51.8661	75.2136	57.5353	6.44065	70.0809	29.3079	88.727	145.779	174.488
evm.TU.chr12.226	0.366213	4.44233	0.569345	0.427896	0.374852	0.237023	303.63	455.308	735.131	3.10005	9.28461	2.88271	679.67	743.105	300.823	3.56454	5.71385	7.70195	336.271	290.748	492.947	33.8377	42.1802	14.1957	1596.6	283.261	1710.37	80.5798	63.3184	122.354
evm.TU.chr13.202	88.995	86.7999	91.7136	128.286	123.914	127.332	74.674	93.0481	62.1013	72.954	64.1808	66.4131	23.5008	30.6805	26.369	53.5839	53.0498	45.4975	50.7455	50.4127	42.9732	51.3137	47.3963	51.4675	22.1336	24.931	13.6052	43.2165	40.4444	28.3338
evm.TU.chr30.249	332.581	299.593	278.231	259.58	259.652	297.774	165.424	183.218	189.443	182.701	209.851	176.225	179.276	180.678	184.275	202.557	235.547	207.881	165.536	208.487	174.512	155.811	193.38	209.798	134.7	215.624	157.831	168.646	141.902	139.354
evm.TU.chr29.116	1.0764	1.42813	0.698856	0.0868805	0.226839	0.213356	379.333	400.644	398.122	13.2557	4.24074	1.03635	0	0.10645	0	0	0	0	0.710911	1.3121	0.0402063	0	0	0	0	2147.08	1118.81	568.4	1202.25	692.929
evm.TU.chr15.134_evm.TU.chr15.132	13.2561	16.5818	14.5407	23.3091	23.7543	21.2519	88.4062	68.849	77.4701	115.025	82.5783	109.918	52.3645	51.5105	51.2122	50.9279	72.7007	42.9584	54.5526	40.1109	37.4989	83.6937	93.2821	77.1927	82.9626	23.674	117.873	68.1344	58.8053	88.1372
evm.TU.Contig171_pilon.43	98.9655	92.667	115.838	113.455	109.379	114.27	71.9662	99.2359	87.0361	91.5578	88.6168	78.1643	81.1698	101.511	90.3797	104.765	74.7822	98.6938	131.859	106.69	161.715	83.5938	84.6968	81.9694	79.726	117.258	122.055	104.399	96.0644	111.045
evm.TU.chr3.1426	320.93	346.129	360.276	372.633	334.231	352.849	304.28	324.937	289.148	315.313	252.798	285.182	193.39	209.344	197.209	224.927	200.285	199.454	411.864	397.023	455.789	264.173	173.316	231.204	249.656	201.62	191.563	309.729	256.257	340.705
evm.TU.chr2.805	78.1147	71.085	72.7599	82.6432	97.7733	111.053	198.081	210.492	214.453	244.393	194.572	210.084	370.042	442.296	495.026	366.838	317.389	508.869	227.826	189.567	348.794	348.985	308.702	232.832	310.391	102.606	119.306	285.811	468.305	372.619
evm.TU.chr1.1343	37.1568	36.8964	36.5282	32.4295	36.0825	34.7258	28.6723	26.5498	26.2006	23.3487	27.4592	23.7316	32.6124	29.0074	32.6418	30.4659	28.8716	30.9229	26.0874	25.36	18.5236	24.3857	27.5031	26.1531	38.7848	28.3327	30.4719	30.7063	24.2942	30.0731
evm.TU.chr22.287	949.794	917.952	1140.68	1167.31	1023.86	1095.67	562.692	737.286	660.119	740.261	824.124	687.282	568.414	778.007	522.714	666.771	644.747	607.267	773.357	750.579	880.1	496.28	563.535	607.842	566.119	794.55	750.171	744.178	534.768	692.149
evm.TU.chr27.275	351.213	330.943	338.333	327.17	333.353	343.142	152.783	154.031	145.572	122.12	147.232	129	121.634	117.611	114.252	118.044	97.6448	126.813	205.208	239.064	202.742	131.605	105.654	123.425	125.882	188.112	145.792	157.406	125.011	139.463
evm.TU.chr3.684	29.6053	33.6494	29.7857	29.1825	32.3259	30.8204	67.1521	66.6296	79.8878	55.246	50.63	48.9187	336.364	244.327	222.092	163.092	126.077	159.304	108.004	96.8245	139.926	88.785	80.3783	70.6608	385.597	67.6053	200.064	68.6239	84.6498	94.8204
evm.TU.chr3.1091	21.1757	19.4214	20.5107	21.6196	20.9549	21.8307	52.6912	46.1266	54.4415	55.8399	61.194	47.6475	83.1127	83.4224	98.1723	93.6723	71.6685	131.336	57.5505	43.9528	65.3486	68.7259	79.6224	60.2798	53.041	16.9962	24.6913	35.5076	57.1818	41.3016
evm.TU.chr4.568	11.2383	8.61819	9.09034	24.6391	26.1275	25.3544	29.044	25.8944	25.3859	48.4279	47.579	31.1056	81.2929	82.1345	119.437	116.337	89.0396	162.647	76.0174	47.6815	84.4051	80.3551	99.3005	70.1076	19.4234	5.053	2.28596	34.7991	59.8078	40.1719
evm.TU.chr3.1470	156.66	173.582	140.877	152.191	139.034	143.736	226.611	254.647	205.518	201.129	184.788	219.723	309.879	251.962	197.319	148.266	251.582	289.941	147.943	114.348	159.965	241.672	80.6754	89.188	209.697	220.807	550.361	153.143	139.697	258.745
evm.TU.chr14.370	21.1407	19.8563	22.3045	28.5623	27.7625	30.0971	112.91	146.954	107.197	118.506	189.848	126.588	527.032	517.926	558.723	562.654	612.949	734.25	197.947	191.505	323.945	480.296	205.495	185.315	456.405	127.498	325.747	241.908	336.419	332.076
evm.TU.chr25.75	12.4236	11.682	9.53628	18.5338	18.1464	18.9239	116.716	130.243	141.432	223.274	220.746	125.304	404.947	458.973	528.749	519.518	456.782	594.305	225.4	125.58	351.104	279.465	435.778	209.785	169.57	41.9346	31.6211	148.298	262.605	251.869
evm.TU.chr26.191	130.565	124.588	120.457	100.985	112.432	115.923	95.8524	101.332	75.5748	92.4724	118.09	118.488	70.9832	68.2591	66.5905	73.3262	81.576	75.3647	68.0648	101.368	63.9652	56.684	79.8689	65.6596	64.2435	194.638	107.864	109.141	142.393	110.797
evm.TU.chr5.774	52.4236	51.4397	48.5522	57.3536	71.7838	73.6756	262.911	355.314	340.111	333.111	333.245	347.617	425.504	404.08	409.638	707.62	738.957	627.85	308.593	292.856	381.045	458.205	439.669	622.518	413.952	110.643	248.148	384.846	342.402	500.691
evm.TU.chr11.271	59.9626	65.3735	64.1933	69.0387	83.3252	72.101	51.3932	44.2611	45.2062	39.4506	41.4521	47.4369	77.6333	66.0762	59.7321	38.0614	37.3063	38.711	57.3279	46.475	31.8568	48.6712	47.2148	45.441	147.042	58.5511	113.989	108.534	63.7603	87.8846
evm.TU.chr23.82	432.493	428.113	425.751	379.172	442.131	503.446	233.718	274.117	282.35	287.121	423.923	315.703	281.873	327.271	283.84	363.335	413.547	375.416	260.136	295.612	245.989	248.366	312.118	342.94	189.672	349.012	248.967	252.016	232.219	210.566
evm.TU.chr16.83	139.219	145.403	144.26	100.916	120.315	115.967	176.315	98.3689	101.265	65.8051	102.228	122.737	41.8425	26.789	24.0008	29.6445	28.6344	27.7826	47.8626	51.3283	36.8121	42.2884	63.5572	34.6669	47.2886	180.321	115.441	75.8992	90.3433	68.7577
evm.TU.chr11.66	45.3779	51.2009	50.4758	99.994	100.024	93.6879	93.027	61.5423	61.0478	113.918	55.956	86.4173	63.8004	54.6537	52.9793	58.8835	63.139	48.434	87.2774	52.5068	56.1955	101.572	87.8643	99.9902	62.2324	22.8454	71.1565	73.4619	71.1465	64.4867
evm.TU.chr12.16	818.48	838.966	960.519	1515.17	1174.69	1208.31	1290.57	1668.97	1863.65	1862.05	1514.67	1552.75	913.548	1046.2	973.722	1130.9	947.09	913.278	2266.32	2405.23	3720.95	1420.47	893.684	1123.17	1345.14	835.933	1915.9	1592.48	1041.36	1203.19
evm.TU.chr20.330	526.069	504.996	558.112	386.066	385.638	354.362	250.585	229.701	187.325	240.397	222.805	270.472	115.867	95.6023	137.042	111.813	89.5452	114.869	369.456	486.819	363.595	213.141	145.713	185.604	121.106	946.418	438.233	380.334	424.179	332.327
evm.TU.chr5.620	274.571	262.413	273.098	256.784	258.114	228.187	183.345	196.585	158.159	228.817	170.567	201.946	199.379	183.657	187.886	152.02	138.889	145.397	284.86	278.538	307.128	343.467	194.709	280.797	214.48	301.409	241.441	428.692	411.125	443.081
evm.TU.chr6.592	25.8971	27.0386	22.4307	28.8689	35.5746	32.0382	87.962	98.9531	83.7449	82.2915	85.7155	78.2984	217.8	176.771	238.152	185.592	179.261	225.708	108.99	68.8851	68.4382	130.61	163.277	115.55	206.29	34.8077	110.787	94.777	93.3079	117.075
evm.TU.chr27.217	69.0565	69.7018	67.9766	58.8122	62.6911	62.174	50.541	45.9778	46.4304	50.564	64.4714	50.4562	46.9317	40.9761	56.9604	77.8248	77.2285	66.674	43.3473	39.1035	39.7617	49.6614	58.2947	47.2972	22.8079	23.3716	19.3676	32.9625	29.4501	32.6784
evm.TU.chr1.1058	35.0353	29.8669	33.3223	24.9076	25.238	26.3595	68.4607	89.4614	57.9615	104.281	95.295	95.6021	37.959	46.3539	46.6358	47.2664	63.6976	45.2658	33.9017	16.0905	20.5508	63.1893	73.7309	64.02	29.8856	18.733	42.052	85.7884	61.0778	59.7464
evm.TU.chr3.550	68.4352	62.6041	63.1807	68.9484	65.3003	62.8576	46.1036	48.0329	46.2478	39.3842	46.8343	41.8353	43.8526	46.7951	46.4347	46.753	43.7491	47.5389	52.5244	55.6512	55.7128	35.5705	37.9588	37.834	46.6692	40.846	42.0911	43.3269	34.6533	40.2455
evm.TU.chr30.17	364.324	323.974	256.362	277.99	261.255	276.801	486.028	700.692	676.346	661.408	591.308	570.729	897.244	845.631	783.971	873.607	875.84	814.016	622.868	641.824	834.646	787.788	681.849	707.649	861.998	358.863	643.452	737.665	616.602	705.506
evm.TU.chr6.36	80.752	82.4344	84.3578	79.7973	80.4338	84.22	71.4224	63.7613	62.6513	57.6738	75.8041	65.5271	78.3576	76.7389	86.0701	78.6804	69.7242	88.9769	61.7051	66.8121	58.9381	69.0247	72.6021	66.8086	64.9067	59.4631	56.8074	59.0158	66.0522	63.225
evm.TU.chr12.320	16.4966	16.009	22.7685	29.3939	28.3425	30.8185	57.6276	63.4166	91.9883	109.925	82.7921	76.7229	94.0902	94.246	86.6492	152.995	113.898	109.873	149.409	126.682	182.554	330.401	188.057	436.812	488.556	116.529	307.833	308.48	198.499	280.447
evm.TU.chr12.214	74.9938	76.2508	68.1031	75.1679	68.7807	68.657	110.106	136.175	117.96	112.421	123.993	143.225	336.869	371.77	286.839	220.684	190.603	185.595	147.787	149.571	180.339	159.881	218.909	129.985	510.969	168.586	398.16	224.189	257.041	229.737
evm.TU.chr8.333	530.117	538.696	805.267	150.031	236.519	143.742	526.24	238.241	401.099	7.06398	6.23186	5.46875	0.454266	0.508401	0.247084	0.364211	0.169175	0.159758	51.2109	179.815	19.7609	0.44922	0.482253	1.27597	0.0271239	1557.89	624.152	229.05	339.148	133.72
evm.TU.chr9.288	315.984	269.74	314.485	319.276	311.16	358.795	176.669	206.591	229.207	203.691	301.287	205.232	301.367	332.846	213.738	266.351	332.612	270.692	141.231	175.793	161.77	177.399	210.799	235.117	163.644	208.379	171.118	181.064	167.734	168.073
evm.TU.chr4.554	351.84	373.509	384.705	398.508	378.542	387.155	232.535	257.449	242.015	225.768	295.454	245.807	281.122	290.973	292.997	265.399	225.4	308.931	257.708	274.011	271.121	240.711	269.807	243.805	252.337	242.798	255.402	226.254	225.849	245.746
evm.TU.chr3.1048	112.449	118.888	118.482	109.3	104.601	112.709	126.402	141.656	124.588	112.717	104.697	98.2275	175.059	206.263	231.289	194.878	178.917	186.215	122.74	123.286	100.807	128.985	165.357	124.915	151.037	156.234	148.389	178.119	187.383	152.924
evm.TU.chr15.137	384.516	410.246	387.105	375.742	335.526	380.809	221.764	242.23	225.396	166.915	195.736	196.142	263.529	209.117	231.149	182.619	194.676	258.047	264.3	334.357	265.333	217.58	166.927	216.731	295.945	279.431	268.359	266.034	212.997	273.892
evm.TU.chr3.375	159.268	153.01	152.914	157.773	149.161	163.565	118.069	131.042	138.414	104.738	120.202	94.9659	140.43	148.946	139.667	142.486	130.368	130.483	119.409	138.826	146.036	116.749	121.717	116.349	138.174	143.318	134.831	124.735	121.524	116.836
evm.TU.chrZ.547	47.6612	41.6894	44.5817	76.0844	82.4484	81.5863	174.717	168.373	228.106	305.095	188.858	328.187	266.265	216.366	231.161	191.89	221.814	184.835	150.208	111.22	97.7284	301.375	214.91	150.211	170.424	47.607	97.0048	154.661	241.077	144.734
evm.TU.chr2.1363	19.6642	19.1908	20.1832	15.4095	19.9614	17.225	39.6797	39.4974	34.4469	36.7306	42.6168	36.609	63.9801	58.7239	61.1599	59.6287	49.7361	65.8032	36.5209	33.3685	32.2656	56.6901	58.9062	50.4919	43.8655	34.2254	36.825	70.0405	47.1178	60.8368
evm.TU.chr8.564	233.747	237.229	184.314	209.516	226.484	210.22	917.11	969.418	904.265	1208.55	1278.25	1014.47	2562.89	3490.9	2708.32	1566.2	1649.11	1771.49	1753.89	1215.83	2441.14	1982.25	1994.51	1704.44	6113.91	1492.67	5582.14	4034.07	3562.81	3380.66
evm.TU.chr7.644	30.2458	28.9067	27.8222	35.4173	38.1475	39.0517	63.6867	55.8465	59.0153	75.3479	61.1884	50.8895	89.0679	67.7379	90.82	69.2715	45.6624	107.674	74.6109	58.1932	78.6318	84.5812	70.9103	55.6485	70.2519	21.153	35.1887	73.9208	75.7489	82.2469
evm.TU.chr30.227	2098.77	2157.71	2568.34	843.217	941.233	942.14	79.5923	286.618	126.503	27.1695	15.7686	5.55464	1.80913	0.869201	0.464677	0.0652335	0.121203	0.467363	264.565	690.951	17.9469	0.876114	3.86964	0.676823	0	3784.66	1354.34	957.977	1108.79	625.471
evm.TU.chr11.234	19.7872	21.6177	22.6069	24.6101	26.8981	21.8628	70.1364	68.0991	51.7721	83.7444	96.3835	85.3091	121.986	124.975	144.956	189.087	165.042	224.96	90.2182	67.2569	143.592	124.473	167.765	117.652	87.0066	86.2276	58.9761	101.046	122.813	98.1059
evm.TU.chr13.404	3198.69	2897.3	3902.14	3775.3	3193.69	3326.07	562.36	385.203	277.547	659.286	754.159	696.888	367.593	683.021	428.33	329.839	478.77	325.672	1924.52	2396.18	1262.59	227.358	647.316	370.933	784.433	3399.07	1981.82	1367.95	855.844	994.089
evm.TU.chr23.40	110.166	106.032	110.939	111.843	111.756	112.67	111.739	121.807	118.024	106.127	97.1197	96.4927	157.734	129.293	143.965	131.636	131.926	152.577	117.635	109.563	123.927	115.78	104.637	114.428	182.654	91.043	129.874	139.053	125.922	137.92
evm.TU.chr3.843	22.0393	22.0751	18.5868	26.8141	29.3311	25.63	35.4885	40.9675	34.085	34.1693	38.632	35.1194	40.2508	40.3561	44.7352	44.2846	45.9652	44.3532	24.4526	18.882	19.3408	32.1866	38.311	32.4697	63.538	21.293	35.8853	29.6337	29.2515	27.5038
evm.TU.chr30.224	310.747	298.432	367.812	286.564	297.573	289.473	389.717	280.535	146.763	436.769	707.41	448.901	114.504	58.5388	57.3955	148.714	193.071	148.58	210.971	231.833	65.9679	113.386	201.392	158.197	0.140797	625.166	192.364	362.019	543.234	625.882
evm.TU.chr8.405	171.425	160.994	178.101	205.064	193.824	188.967	127.478	140.82	117.29	127.786	116.906	112.821	120.698	128.219	124.699	130.551	118.604	115.157	163.241	159.476	175.559	148.536	109.96	159.758	152.192	146.541	155.035	187.638	152.775	172.989
evm.TU.chr2.480	45.525	47.7934	50.6309	57.9708	52.1741	53.0891	47.2205	53.3385	49.6525	50.9292	31.7491	47.4749	26.111	26.8498	21.4598	20.6999	19.1877	19.5868	69.2553	55.9533	52.7202	45.5185	28.5026	36.5493	28.8939	41.6883	39.965	50.5618	34.638	47.0737
evm.TU.chr5.236	267.63	261.06	270.387	247.387	221.013	255.918	245.678	241.296	236.825	193.408	193.302	188.758	197.771	194.156	205.935	201.151	180.665	229.083	168.576	233.234	190.854	172.614	171.896	186.02	239.725	357.264	338.59	240.784	250.182	265.346
evm.TU.chrZ.490	52.7308	64.5665	59.1969	83.2135	83.4931	72.02	435.324	501.766	828.293	199.433	114.558	192.747	432.229	455.243	252.645	109.403	85.3787	104.055	271.812	243.442	341.101	372.259	221.661	176.782	673.354	157.527	680.439	498.249	354.442	450.503
evm.TU.chr2.306	48.451	49.066	52.7313	59.84	56.0609	48.6083	58.0336	53.7846	41.3131	46.406	32.2837	45.6407	29.665	32.5007	24.7208	31.6766	25.0214	25.3869	61.1941	73.3966	74.4832	45.7644	26.104	36.5811	52.7681	27.8462	33.9325	50.6566	47.7329	61.877
evm.TU.chr1.2861	237.428	239.79	227.514	227.999	231.771	225.764	139.341	151.104	148.393	126.467	137.429	126.759	147.144	155.251	176.242	161.559	164.888	141.949	196.182	224.882	194.695	142.689	160.869	158.978	158.49	172.553	156.606	151.224	146.007	137.63
evm.TU.chr7.605_evm.TU.chr7.602	18.3178	18.834	18.6884	26.3791	25.3238	23.4839	59.1107	54.2591	58.5666	62.8502	68.2174	59.6051	59.4371	56.0568	68.1768	76.187	67.6943	82.74	55.3295	44.1477	58.8806	67.6459	71.2642	63.3951	56.2043	14.9636	39.4428	38.3182	44.206	38.8159
evm.TU.chr11.455	73.5249	75.6187	76.4705	70.5437	69.9668	77.5732	53.3401	57.3861	47.4548	51.821	66.0061	62.1426	64.5161	65.7351	62.3758	57.0823	54.2449	65.121	53.2861	54.4003	50.1845	48.9101	52.2722	53.8589	62.6004	76.4208	62.4634	73.5778	75.7835	84.4494
evm.TU.chr2.168	28.4545	32.2131	27.9557	32.5424	28.5308	22.8416	195.817	93.3615	142.563	231.052	152.045	152.233	209.308	127.635	158.586	219.915	199.115	175.135	190.782	190.719	203.966	287.425	406.688	270.65	721.315	145.202	336.488	156.968	255.232	289.503
evm.TU.chr30.241	945.716	982.959	1563.61	939.794	1318.75	1212.93	115.821	221.894	66.8918	109.592	148.351	124.054	14.264	20.6353	7.06574	7.23142	6.89629	7.40133	463.689	707.297	80.6449	20.9958	53.6208	27.8868	0	2951.26	1119.74	972.495	1079.87	833.224
evm.TU.chr6.629	58.7237	61.854	63.7875	82.5008	84.0345	77.0327	78.1309	72.4337	89.9907	103.105	113.138	91.8675	141.25	127.148	157.752	192.628	181.855	222.481	109.775	71.303	94.5411	176.145	222.066	167.087	88.1519	24.9415	32.3031	98.422	117.799	134.985
evm.TU.chr21.179	20.4619	18.9729	18.0015	19.0067	20.1464	23.2565	43.6883	39.4438	42.0441	45.1159	52.0898	39.559	38.1568	33.4643	42.7704	54.7352	52.923	73.7042	40.083	28.5139	54.7502	46.4932	51.351	33.6611	11.7993	13.8844	9.04958	19.5244	33.9216	25.5061
evm.TU.chr17.421	215.797	202.991	204.636	184.805	184.675	185.186	105.786	120.083	102.305	118.291	116.175	110.506	134.755	130.811	146.525	149.798	123.856	145.524	165.117	190.158	160.494	131.921	127.655	126.18	106.138	170.598	120.835	152.701	142.986	151.84
evm.TU.chr28.143	67.4682	71.1186	59.2428	85.9608	79.1093	83.6083	63.4207	64.1152	66.8498	63.8807	61.5802	63.6353	101.475	118.628	117.407	70.258	63.5455	81.1091	63.7682	68.9588	71.6591	79.7275	77.8406	81.2275	138.584	40.0467	82.8502	69.4733	74.3009	64.1527
evm.TU.chr11.307	121.164	94.2871	67.55	196.776	204.799	190.594	103.162	139.914	114.157	140.493	265.084	197.141	132.612	131.494	149.752	170.726	147.591	175.918	116.781	115.468	114.754	135.976	147.223	134.413	167.621	130.611	115.805	115.199	113.724	134.837
evm.TU.chr11.167	7.87105	7.42563	8.17537	6.35926	7.10193	7.44583	33.4373	35.7388	29.5462	36.3699	49.5079	47.2917	69.4027	59.1438	77.0934	77.2165	69.0534	84.319	30.1467	27.2959	47.1971	54.0311	64.3459	48.0246	62.3242	17.1575	51.9143	52.9622	74.6006	69.0828
evm.TU.chr27.279	47.5661	41.8196	45.3382	54.7401	54.7375	48.4592	27.4984	24.3391	22.6023	28.7959	18.5371	21.8923	13.3779	14.3855	16.3953	14.9054	11.8475	13.2226	28.5927	38.4227	24.3994	16.2416	19.9384	12.7856	0.432647	23.8469	6.5756	10.0536	6.94708	4.12413
evm.TU.chr17.475	188.854	194.564	179.091	186.702	182.763	192.679	141.615	118.145	122.21	102.717	129.689	121.698	101.462	106.149	99.9624	96.0042	91.7473	117.164	97.5566	91.9423	84.1457	96.5609	102.51	91.4377	109.307	106.265	104.516	98.0169	98.0046	116.763
evm.TU.chr17.190	1309.78	1575.52	1659.2	2299.2	1777.72	1674.53	1113.64	1348.11	1448.28	1540.81	1880.49	1589.52	1129.2	1059.49	1012.82	1234.75	1240.64	1019.86	1658.05	1628.62	1797.84	1054.81	1037.88	1052.25	791.282	1208.81	1100.7	1307.37	1059.94	969.244
evm.TU.chr1.298	7.26489	8.48613	8.01647	8.30356	7.4731	7.32694	68.1417	67.0528	83.0348	43.1534	41.5492	43.0737	108.439	112.037	85.5191	67.7048	64.4919	81.8072	50.7951	55.4898	65.0521	71.265	55.9748	44.1433	152.9	21.3756	82.3845	37.699	41.6054	37.1467
evm.TU.chr32.36	203.682	192.258	188.319	203.275	206.878	206.523	131.067	142.45	135.247	134.521	152.929	142.958	154.159	152.083	170.26	137.589	156.346	166.055	157.66	184.481	168.333	142.223	136.227	172.104	195.749	173.504	155.68	176.816	147.231	190.896
evm.TU.chr32.44	0.0636001	0.300027	0.0629222	0.316372	0.25019	0.108855	28.3433	21.4321	28.251	35.9779	31.881	28.622	95.1108	88.7831	66.0546	49.7598	94.1486	74.9568	15.9481	10.3051	26.8014	44.9338	59.939	45.3373	87.3953	10.3868	55.0636	30.5198	67.8235	52.0494
evm.TU.chr17.105	318.014	322.923	305.678	316.978	334.93	280.539	226.927	207.44	220.734	187.608	145.843	198.285	255.134	245.449	252.802	211.168	192.223	205.614	234.911	283.459	339.106	221.568	191.157	184.162	199.451	201.449	238.387	229.408	175.655	213.092
evm.TU.Contig521_pilon.1	30.7996	25.9614	29.0756	34.0448	43.7883	32.5281	44.6509	43.4649	38.4359	41.8193	58.2797	48.623	56.8641	50.4741	41.222	48.0515	48.1531	40.0742	24.3929	18.794	10.22	34.4899	48.3802	38.7839	73.3939	53.9047	68.2617	78.6301	28.3176	62.0125
evm.TU.chr26.223	59.5856	52.8042	57.213	66.5284	63.1287	70.6437	477.347	460.975	640.873	466.604	389.473	367.31	581.316	601.231	496.813	443.999	448.487	483.762	427.648	299.174	472.763	446.996	474.423	348.076	574.169	130.301	442.636	361.626	325.56	360.519
evm.TU.chr7.706	120.141	115.033	115.611	130.98	91.1896	86.6303	359.897	314.275	334.635	411.229	346.894	383.512	277.283	276.133	180.558	236.151	292.587	581.07	232.13	196.455	367.502	508.48	89.8452	151.686	216.245	209.222	324.416	196.554	205.193	242.71
evm.TU.chr5.1320	159.702	157.207	158.086	134.604	139.865	143.963	103.898	113.507	102.923	108.938	135.857	107.758	151.217	150.458	138.894	136.332	157.243	134.023	120.701	120.78	90.3549	96.0108	125.021	120.562	99.2969	137.094	113.903	122.639	107.339	108.94
evm.TU.chr28.105	34.5289	9.47352	8.80009	33.7517	36.6807	39.1829	150.531	78.2438	118.775	190.415	237.825	161.668	102.753	79.8897	99.2258	172.24	206.566	203.65	83.1829	62.2394	87.1127	225.258	242.39	225.45	64.6493	64.1061	51.6227	106.088	101.446	174.351
evm.TU.chr26.183	93.2889	112.704	119.397	129.967	89.6645	136.338	1065.21	740.554	141.942	1669.45	1964.9	2487.08	518.16	233.655	260.351	304.655	589.935	298.914	293.982	107.211	38.054	270.049	632.12	665.451	0.381962	437.525	141.657	654.376	1027.37	915.288
evm.TU.chr8.516	96.2504	93.0099	104.605	144.746	151.539	158.247	133.499	100.894	115.9	137.734	102.645	115.469	97.1315	110.544	116.17	140.566	123.179	151.303	91.998	80.7502	126.67	126.387	132.385	102.878	46.7933	26.9666	27.2383	83.2768	80.5669	87.558
evm.TU.chr29.77	2001.06	2083.9	2205.64	1629.69	1717.32	1629.98	2381.57	2382	1993.76	1953.84	2412.35	3200.21	309.418	268.605	173.041	202.796	355.17	296.599	588.514	945.439	248.862	193.814	378.644	300.867	255.2	4979.19	2147.19	1488.17	2146.81	1414.87
evm.TU.chr11.257	43.9892	45.8596	45.0475	37.3109	37.0024	39.8278	34.6545	36.4697	28.7861	32.6524	52.5344	43.3398	33.4966	26.6273	29.3544	30.5203	29.3942	35.0392	37.5204	40.4842	37.0606	31.2196	32.2362	30.2504	22.4961	32.1255	26.3266	33.693	28.9458	23.9265
evm.TU.chr10.601	75.3983	83.2	100.987	113.745	95.2194	117.309	254.059	377.519	220.942	321.745	329.252	273.665	192.23	266.415	217.874	266.111	292.407	260.024	223.997	170.776	267.766	231.24	235.335	233.378	206.335	137.867	159.283	330.481	216.851	271.106
evm.TU.chr2.1118	930.96	865.283	1035.53	1068.02	970.772	1049.62	637.499	823.383	681.078	752.734	833.374	781.426	664.607	826.818	602.585	761.643	806.552	592.4	817.65	768.027	889.147	652.866	556.146	782.755	555.875	944.489	896.889	895.172	851.513	801.108
evm.TU.chr27.144	67.5921	65.6998	58.328	72.0287	70.7982	66.1001	40.3009	43.4724	37.395	35.069	42.9146	37.1385	45.9722	42.8339	45.6476	45.1085	43.2976	47.436	48.5899	55.1464	39.6777	37.5818	38.2855	42.7635	42.9738	61.9042	45.8874	47.2422	44.6987	43.5774
evm.TU.chr25.49	369.506	346.775	388.36	386.546	350.878	401.1	267.085	304.28	302.73	272.682	250.642	242.486	181.773	206.768	174.186	214.196	198.987	183.983	295.191	304.439	377.963	219.565	170.705	192.976	196.375	242.171	251.619	205.39	181.847	194.14
evm.TU.chr10.312	268.188	289.432	305.343	265.806	292.703	284.575	235.577	166.85	131.238	140.386	197.826	168.439	57.069	45.9719	54.5127	86.726	102.446	109.134	83.7841	91.4264	35.4004	68.0629	104.643	82.5325	26.4802	311.449	127.606	168.791	233.773	180.513
evm.TU.chr28.57	1426.38	1409.8	1420.41	1302.6	1258.61	1197.1	798.231	844.154	774.803	805.371	694.204	682.018	576.934	901.099	605.791	772.997	729.759	732.114	1393.82	1430.69	1384.1	838.848	653.845	860.848	533.156	1117.3	838.288	919.343	710.385	741.068
evm.TU.chr9.249	40.6141	41.7782	41.7992	61.4946	65.9334	61.6305	57.7428	46.5228	51.2463	57.7328	61.6964	51.9791	55.3908	52.4468	67.9445	78.1275	65.0141	99.379	49.4975	36.8117	39.38	61.0361	66.6767	51.5763	29.1866	17.7963	11.2327	36.9851	46.3265	42.1135
evm.TU.chr1.1637	133.288	126.218	140.635	133.224	145.724	131.842	109.276	137.864	125.918	110.531	110.127	100.978	260.06	199.729	209.154	218.262	216.005	261.559	164.291	143.053	134.873	168.095	156.119	148.699	205.928	161.245	166.255	243.23	180.164	288.573
evm.TU.chr2.1181	245.49	244.115	235.607	245.209	227.538	241.377	149.796	157.893	163.494	135.676	169.62	124.193	192.206	184.091	198.447	197.776	213.66	180.412	148.833	169.735	157.164	147.969	187.436	179.748	132.602	171.96	136.026	150.317	152.022	130.469
evm.TU.chr1.2428	23.9589	24.2033	27.7611	23.8995	22.6724	23.8691	36.8043	34.8233	30.356	34.0014	36.7875	33.5886	62.9303	74.3429	80.8826	64.2636	54.5643	71.0134	42.8236	36.0874	47.5087	60.2691	67.9152	60.4017	34.1521	34.3676	28.8546	39.4762	59.1414	36.8036
evm.TU.chr29.81	673.771	650.778	730.19	814.897	614.002	569.286	636.179	705.012	490.632	486.121	615.566	619.687	427.527	437.039	324.835	368.388	279.382	316.863	566.085	582.327	663.877	409.029	311.439	314.148	316.773	440.104	649.392	658.748	527.966	565.439
evm.TU.chr3.1127	65.3502	64.9811	58.7411	87.7268	96.5008	93.3381	119.052	123.063	109.117	107.834	97.5387	98.2447	102.25	88.956	97.0668	109.763	118.677	87.4033	117.473	107.91	93.7525	121.266	84.249	118.748	150.945	70.7461	116.145	89.1457	94.7259	111.177
evm.TU.chr18.199	160.861	189.786	161.697	166.174	190.288	193.85	104.793	97.8373	91.4825	105.702	85.2531	111.215	76.3486	83.0186	73.1288	80.7251	61.4188	85.807	103.607	98.1753	121.656	85.8877	72.4884	79.2019	95.7006	124.008	105.279	81.9735	97.5319	82.7037
evm.TU.chr1.2455	43.6133	45.5637	46.4009	42.1404	42.4604	45.9663	35.3142	33.7775	36.1932	38.939	44.2014	35.64	34.2249	35.8056	36.6922	42.3447	44.6208	32.1717	35.914	43.804	42.0362	33.4501	34.7371	35.5399	21.9391	36.1399	30.1743	33.042	29.5304	27.0145
evm.TU.chr7.110	146.157	154.233	160.281	122.948	130.192	134.562	61.9796	72.2356	61.7335	55.1937	55.0978	54.8147	79.0968	77.5116	71.1518	59.6866	62.0931	66.1809	84.1491	96.8887	61.2133	60.1496	58.9351	65.7505	72.665	144.84	93.2078	89.8936	73.4977	87.6553
evm.TU.chr7.78	60.4691	46.0521	40.6566	60.6234	57.6163	56.3224	170.219	202.355	135.895	234.588	203.542	205.903	347.795	415.313	297.673	386.983	413.185	253.587	208.378	198.003	275.262	314.523	340.224	291.707	482.587	171.255	387.959	456.85	452.908	492.065
evm.TU.chr2.1318	169.978	157.488	181.106	188.315	182.327	157.252	302.187	334.087	370.485	281.998	353.516	292.738	320.224	347.533	305.881	526.791	327.474	414.415	289.074	205.517	243.035	353.403	251.722	404.219	420.53	468.423	411.326	283.37	326.669	266.438
evm.TU.chr19.219	30.247	35.1933	27.9012	25.8761	25.7394	25.5686	110.246	139.249	201.218	25.2945	33.6409	22.0582	154.317	143.493	118.386	71.2408	68.1521	99.9336	176.218	190.257	208.004	48.9838	44.9881	34.8595	377.693	72.9524	280.404	73.2109	72.7634	72.7862
evm.TU.chr22.186	68.8294	61.9718	60.5619	82.5416	82.3946	103.365	29.6463	30.9492	35.5541	24.0421	23.5391	25.3599	34.5407	37.5566	53.2219	32.9097	28.5513	37.104	33.4827	35.2859	31.8024	27.5177	32.446	30.0253	50.2562	28.946	42.3179	26.5804	34.0511	27.1887
evm.TU.chr18.448	24.141	21.6911	19.9829	15.1703	18.4785	14.3569	23.0118	20.6795	21.8053	24.0072	26.8498	18.9167	59.4471	56.4332	69.9438	56.4295	45.2234	64.3759	29.9346	25.4909	36.8317	43.2685	51.2471	32.405	29.205	30.6223	23.4247	39.9893	54.4571	38.756
evm.TU.chr15.121	73.4587	82.0053	70.6171	85.3026	77.4808	79.7412	54.1599	53.7707	52.3764	46.6356	44.2277	45.0905	43.9722	39.6654	40.6365	45.4545	41.375	45.3172	60.191	67.8246	54.9392	46.4851	38.8053	41.7991	37.4184	44.79	41.6312	46.3995	38.4661	42.983
evm.TU.chr29.193	399.02	441.877	445.85	362.694	336.689	357.501	146.474	143.591	147.034	136.301	140.942	126.19	137.741	144.435	126.697	100.878	118.233	120.951	218.196	209.33	137.781	123.439	117.214	138.977	142.877	238.475	147.132	178.711	162.32	153.964
evm.TU.chr5.1184	119.495	113.25	112.644	80.5129	83.8881	87.6503	78.7805	61.9703	51.2963	45.4992	56.9639	69.3331	70.647	65.5882	60.0184	50.4581	51.9067	61.1482	55.5321	69.716	54.0159	37.4851	41.0485	46.2819	98.3338	80.4718	66.5555	63.5962	66.6196	66.5658
evm.TU.chr18.11	151.14	147.555	148.106	143.696	138.498	140.744	73.6343	81.6728	64.034	70.015	60.6912	65.5089	67.6768	65.138	59.0905	64.7527	58.3324	63.8183	124.446	134.235	116.709	81.6995	65.1166	75.9854	59.9737	106.036	85.8366	96.758	84.8697	102.484
evm.TU.chr20.224	97.4781	102.595	101.919	89.9152	89.3228	87.8924	98.5819	92.6121	103.148	82.4783	63.8541	73.2481	76.5737	82.0927	68.5147	63.6396	61.9703	57.8851	124.856	117.755	112.589	103.354	77.5535	96.2205	120.835	84.0652	121.273	108.644	79.2272	112.039
evm.TU.chr5.884	8.9762	10.2896	8.53335	16.8237	20.0685	18.3422	38.5475	128.16	35.3976	53.2446	45.549	40.7738	168.696	148.608	118.622	39.3646	58.1779	82.9696	32.9078	20.8929	14.3938	58.704	47.8551	40.31	200.959	88.2112	277.044	267.977	134.733	238.764
evm.TU.chr14.32	219.472	218.253	211.801	147.007	156.658	189.643	68.6693	66.0166	66.1744	42.9793	46.1183	47.4725	29.3873	32.57	22.3414	30.3336	38.1404	34.6716	57.7514	88.6004	47.0593	28.7846	31.1829	37.5247	26.5788	103.442	44.7463	49.6096	41.7554	39.7139
evm.TU.Contig935_pilon.3	12.6467	28.8602	19.7574	35.5252	22.3787	23.0417	170.347	419.846	278.139	19.1109	15.6513	27.9231	549.045	729.707	203.814	20.4438	13.4656	10.8793	244.414	405.988	407.981	44.7863	27.2803	34.9771	1375.92	206.096	1520.66	105.487	93.2149	143.048
evm.TU.chr5.179	6.6689	6.93996	7.02483	7.48086	7.19059	6.6213	11.7461	13.0141	10.4777	11.6469	16.2107	12.3635	24.2201	25.2189	31.7403	26.9139	20.8167	31.5107	10.89	10.2825	11.9013	15.5677	23.3375	13.0177	23.8834	7.1446	10.3499	15.7732	13.8815	11.4951
evm.TU.chr1.403	561.985	627.59	669.513	639.861	629.864	649.39	231.494	224.365	236.606	243.979	207.652	210.351	180.501	206.628	177.238	220.932	213.533	190.76	409.352	423.038	383.36	227.713	237.151	235.57	135.695	301.896	176.842	218.693	201.354	179.136
evm.TU.chr11.245	194.89	182.861	175.35	190.207	188.845	186.204	222.36	203.928	235.456	201.244	234.265	175.633	191.743	191.207	178.058	240.145	215.775	171.269	213.879	238.736	208.968	212.284	233.225	237.252	174.47	147.218	148.313	168.469	157.622	158.147
evm.TU.chr3.253	315.771	290.318	308.615	288.677	281.658	303.059	204.809	220.037	213.97	189.734	219.83	190.939	242.677	279.247	254.458	241.504	282.531	234.529	243.367	268.915	273.235	196.791	238.087	221.589	163.729	218.762	180.159	203.087	189.428	195.137
evm.TU.chr23.211	554.668	544.274	524.859	608.556	551.449	604.296	473.415	396.027	476.333	449.095	425.003	372.19	220.532	238.812	243.148	392.615	326.698	325.582	550.816	573.855	654.518	388.2	422.993	345.633	154.469	210.146	155.244	202.987	198.057	175.768
evm.TU.chr1.2425	133.208	128.503	131.85	122.079	121.581	120.835	86.7115	90.8722	91.0818	77.2026	77.4814	71.5595	116.6	98.9099	108.592	102.352	98.1076	107.801	118.892	140.667	132.216	96.807	91.7071	94.318	97.1413	93.5437	88.59	86.9546	97.5078	92.9026
evm.TU.chrZ.208	264.051	419.359	441.311	374.17	376.829	344.018	505.486	377.587	346.98	621.659	620.582	626.938	239.792	326.346	276.607	484.343	637.323	375.066	254.742	194.333	146.196	473.352	512.119	585.293	307.486	606.339	359.613	496.473	592.529	549.357
evm.TU.chr36.21	430.631	425.745	440.625	407.142	412.236	409.827	277.418	355.899	345.687	346.124	416.875	337.765	348.962	411.226	336.707	410.857	520.645	467.891	306.215	345.881	338.281	282.34	296.744	362.995	239.713	364.083	338.208	350.589	317.422	275.867
evm.TU.chr13.141	93.6956	118.556	111.244	158.44	155.036	155.494	236.332	213.158	229.547	247.24	179.993	189.059	94.7089	134.813	79.7916	137.543	139.296	110.461	288.409	225.583	228.573	264.955	203.042	358.437	146.765	102.569	150.305	190.03	139.633	185.35
evm.TU.chr35.47	35.7869	33.8751	31.5695	37.6076	41.5622	39.8179	90.9924	76.4988	90.2983	92.3705	88.89	86.2833	125.125	161.119	107.576	86.9407	80.1892	162.826	72.7341	63.4465	117.743	84.4333	76.8775	63.9129	47.6344	13.3191	19.7549	80.4428	85.2764	135.233
evm.TU.chr7.418	21.5386	17.1808	23.6397	38.0725	37.4469	41.7165	112.744	144.688	135.786	176.852	154.505	126.218	269.332	288.25	283.082	213.024	166.043	300.001	223.522	146.691	245.42	250.307	197.289	165.023	269.356	50.2522	36.7086	207.485	224.736	241.764
evm.TU.chr27.42	3.74949	3.95736	7.98975	3.911	3.01883	4.18151	42.7136	66.5637	40.2005	40.9205	42.4224	53.6872	166.649	145.907	143.287	157.598	141.773	131.525	148.571	125.102	329.492	167.574	115.689	155.534	493.748	52.3559	170.699	106.821	164.925	150.211
evm.TU.chr18.63	37.013	32.6771	37.6189	34.223	31.847	28.009	108.19	109.447	142.284	63.4466	55.8287	67.8245	166.959	136.223	115.937	124.502	158.375	97.0087	91.2033	83.4731	90.0868	99.2824	55.1321	57.9546	295.429	72.3946	201.473	58.6196	58.4189	92.7459
evm.TU.chr7.551	86.103	55.8788	53.3866	52.2975	43.7475	44.8879	514.45	2964.22	3735.46	795.803	1096.67	653.415	1459.4	2113.39	1906.95	2937.76	2259.5	3377.19	650.297	400.806	1097.55	1532.07	1451.45	1084	990.142	829.834	3110.41	2292.17	1749.07	2271.04
evm.TU.chrZ.720	46.5159	46.816	50.6076	56.4461	54.8952	55.2457	66.2075	81.2875	61.1052	65.9272	65.1897	57.3984	60.6098	76.4706	72.0094	95.7971	75.506	74.6796	73.378	61.5237	74.0863	75.7013	86.8939	73.9131	96.9779	57.3943	85.3015	124.792	86.4022	99.7179
evm.TU.chr18.61_evm.TU.chr18.62	144.526	133.992	152.286	157.842	144.945	152.321	132.605	126.752	137.454	121.162	95.6984	99.6291	110.12	113.051	106.39	102.664	92.9825	105.42	144.19	125.421	131.65	107.464	96.3046	103.444	112.898	92.1285	100.575	121.584	108.59	112.975
evm.TU.chr4.92	21.1143	21.8948	18.2636	25.5192	28.1994	26.4528	31.0718	24.398	26.2872	20.8313	29.7192	23.8125	48.2635	53.09	76.8235	51.3428	34.6066	81.3331	38.1569	32.8358	41.3705	40.9291	51.2901	32.0386	60.4753	12.2998	47.3474	30.2792	31.9237	30.3447
evm.TU.chr2.831	228.629	185.343	211.075	210.162	227.379	218.13	27.4655	28.1622	23.3137	43.2389	47.0578	45.2127	16.7078	18.2521	21.4601	44.5287	41.7441	29.8647	32.7978	41.927	15.4459	24.5974	31.9311	26.3295	3.13301	30.7951	8.95745	17.3551	28.8797	20.1414
evm.TU.chr3.59	19.2498	18.7595	20.5787	16.3307	15.8058	15.7891	17.829	19.5606	20.8864	15.1396	14.7139	12.4931	22.3298	20.8617	21.7718	17.225	14.5356	17.9788	20.3243	24.552	27.0211	16.4697	16.1958	14.1305	39.4224	24.9931	38.2682	19.1751	19.3642	19.2386
evm.TU.chr10.494	31.0315	43.0184	37.6675	34.5969	36.4248	39.1675	66.4449	82.6216	91.707	47.6083	48.4194	50.7317	128.992	130.965	111.128	72.3825	68.281	71.9165	65.4534	57.4527	92.9758	65.0103	76.323	55.4736	189.361	90.1003	193.624	104.961	110.806	91.879
evm.TU.chr2.1362	17.6275	17.064	22.6021	18.7176	25.0019	20.8359	43.6223	41.6378	35.4386	40.7454	50.3066	44.7694	69.2866	61.0578	61.064	61.9013	54.6469	64.0752	35.6351	25.4549	18.5226	59.825	65.9971	56.434	43.7078	38.8865	39.6777	86.9112	34.1268	71.3743
evm.TU.chr8.669	265.295	259.72	261.178	273.458	279.657	288.167	220.613	243.005	205.63	232	214.651	211.679	257.191	237.451	256.672	252.445	247.956	243.253	209.42	249.352	218.672	225.045	202.635	227.71	296.996	189.325	204.021	221.605	207.372	211.574
evm.TU.chr26.264	50.6336	46.0878	54.8366	50.4416	55.979	48.3641	77.1969	87.7851	85.498	81.6085	63.9367	93.213	85.585	73.7068	59.1786	54.8766	95.8245	46.9484	89.7364	74.8106	65.3742	101.32	84.6697	94.4476	70.6119	34.5849	50.5731	61.3074	58.3714	53.9053
evm.TU.chr15.171	95.8094	82.8373	120.813	160.857	124.071	135.534	236.811	254.766	330	167.681	178.124	173.59	193.154	160.512	170.396	374.996	361.198	59.0688	524.759	413.321	551.391	1792.31	470.563	1940.31	1197.87	253.052	417.516	990.06	957.72	867.869
evm.TU.chr22.111	140.462	135.67	145.08	130.619	125.448	129.768	77.5615	79.5643	76.0367	80.8656	83.2244	74.7054	95.3788	99.0077	100.839	116.652	121.231	110.202	105.86	107.44	100.22	87.3775	104.833	91.6557	82.6846	101.816	81.3894	83.9536	82.2875	79.8449
evm.TU.chr11.29	38.1688	37.3009	32.2519	37.967	38.4502	36.2193	78.3156	51.3719	84.7112	51.5777	42.922	56.5771	41.2376	31.2691	34.6991	49.9184	46.9772	44.0492	35.7211	39.6987	28.774	43.1974	41.6769	42.257	55.3724	26.9874	22.4293	25.6782	22.7771	21.6011
evm.TU.chr18.346	16.463	14.0014	11.2801	17.2082	15.1075	13.9001	14.7763	15.0794	12.9718	13.1261	15.529	12.1945	34.3513	36.0774	54.5726	46.4803	33.135	93.2346	28.9536	31.0045	37.8132	31.7953	38.7593	25.1082	30.6424	14.6146	19.9582	34.7961	40.5221	39.1069
evm.TU.chr32.74	319.671	295.368	298.293	271.393	294.749	278.301	152.63	170.964	168.274	165.899	159.273	169.447	198.325	208.751	204.121	235.591	239.175	270.62	247.365	275.162	210.895	207.253	204.826	207.113	177.152	306.791	212.432	243.72	224.699	253.172
evm.TU.chr15.405	92.4727	92.7054	93.4983	86.9218	88.1468	92.0805	52.305	51.4097	48.3777	43.2394	44.0262	41.6152	47.4828	43.7879	55.1909	53.6623	49.5365	59.7529	61.587	72.1058	57.7867	52.1739	44.7664	53.305	47.7849	48.2747	44.0796	49.2859	47.3022	48.1933
evm.TU.chr18.174	769.212	744.263	826.807	747.294	720.21	670.366	413.496	652.785	512.637	409.995	383.493	451.518	420.281	599.725	384.864	470.658	446.965	494.639	766.979	746.758	1106.51	450.624	341.634	417.887	524.004	829.166	758.279	582.911	489.954	562.283
evm.TU.chr15.142	211.655	217.889	232.916	227.369	228.508	234.7	166.425	177.502	159.14	147.702	167.553	171.9	151.535	143.708	143.262	135.616	152.317	148.246	170.398	183.662	139.513	145.013	126.051	148.063	155.365	172.493	141.671	198.879	177.288	210.44
evm.TU.chr19.258	5.79253	6.08236	5.24166	8.48758	6.66182	8.13718	32.6981	34.3454	37.3117	20.9241	20.0299	20.0325	89.4115	83.6116	75.8482	52.2286	47.189	64.4737	32.3703	34.0382	43.9679	41.813	34.1043	34.6768	94.1086	18.2611	50.1285	28.5099	30.7202	29.7361
evm.TU.chr29.74	703.03	686.521	766.808	585.318	555.948	603.529	1228.93	1310.19	1043.24	1037.72	1247.72	1531.35	187.923	181.328	152.472	165.696	211.077	141.415	616.408	545.857	666.688	148.799	258.027	207.918	259.525	1953	1167.12	750.665	947.414	713.107
evm.TU.chr2.861	85.2719	84.5583	73.0811	115.316	99.8174	96.5946	136.439	158.505	109.63	125.816	193.236	160.648	401.179	375.26	334.017	468.606	850.95	567.697	223.934	150.564	193.2	357.589	115.263	177.141	341.178	209.578	373.401	277.256	229.569	373.81
evm.TU.chr17.412	313.43	358.545	425.136	340.543	360.741	314.83	83.6002	89.371	92.1922	61.53	71.2041	49.4867	34.5228	33.75	32.2581	41.7158	45.4353	33.7221	79.0104	125.974	66.1271	35.4407	42.6651	52.7642	31.9717	332.508	135.8	97.1228	107.948	71.9869
evm.TU.chr23.88	523.411	481.138	473.742	408.691	427.87	454.987	140.47	126.181	157.852	157.098	203.911	168.033	40.1372	48.7841	64.7128	100.53	95.0448	88.4985	110.92	130.031	84.77	87.676	83.3048	173.184	48.5546	125.554	61.0659	80.6809	74.452	68.9145
evm.TU.chr21.331	1.53713	0.997808	1.13489	2.90358	2.90091	2.26594	11.3053	24.3187	14.1245	30.2178	33.8855	17.2904	217.545	293.938	205.91	185.863	132.992	318.828	89.7863	66.3154	149.7	171.108	113.989	85.4576	16.3405	19.7249	3.72595	160.882	226.998	321.614
evm.TU.chr21.344	260.581	263.814	288.702	299.686	288.971	309.539	176.771	192.129	176.457	172.285	170.566	182.063	158.221	161.671	138.771	153.046	146.719	154.536	221.476	203.6	170.825	166.807	147.496	168.028	144.091	222.165	163.471	199.641	173.808	215.642
evm.TU.chr27.307	11.1732	11.3621	11.8209	10.6143	11.0337	10.5014	39.9901	34.7804	35.995	32.3519	26.4593	36.5569	62.0586	52.0793	56.5	36.399	35.4235	37.7775	29.4756	35.0187	36.5488	35.2431	35.6783	33.874	93.6133	20.2833	37.8313	26.8924	41.0751	35.3741
evm.TU.chr20.400	223.567	230.426	263.5	260.899	232.109	254.644	199.662	299.936	239.405	235.463	255.249	237.133	223.385	267.916	221.919	242.58	223.789	234.209	249.953	266.088	263.894	206.462	186.778	200.696	252.873	332.92	321.167	263.479	257.574	276.188
evm.TU.chr1.2440	31.2305	33.0775	31.0684	31.8307	34.0582	37.0795	53.9783	48.7432	48.8733	66.9612	72.7137	53.0689	155.036	153.885	218.015	237.632	187.15	336.177	108.146	73.3522	104.042	163.569	194.563	126.067	53.8733	26.3874	21.5283	102.614	131.591	105.458
evm.TU.chr17.220	289.704	327.952	353.67	510.709	409.723	403.935	214.741	318.044	270.696	322.632	335.514	317.353	164.737	249.709	195.445	266.865	254.063	216.006	239.941	372.237	527.284	254.99	238.282	236.846	200.556	293.479	266.334	229.64	216.305	229.045
evm.TU.chr19.106	1198.63	1335.47	1546.9	1995.51	1425.37	1286.04	859.296	1297.25	1168.06	1000.17	1064.13	980.087	637.497	776.676	622.688	657.411	774.172	592.137	1167.8	1480.24	1704.84	662.763	712.937	741.289	532.092	1023.66	814.283	812.835	814.314	706.594
evm.TU.chr7.629	153.912	150.313	154.825	134.961	126.244	131.288	83.8047	96.1636	93.8996	71.3009	65.0987	67.0823	119.488	125.91	126.273	94.0298	94.0586	104.045	138.724	157.1	159.635	103.291	93.3196	89.7441	90.7358	136.738	120.796	106.046	111.561	109.354
evm.TU.chr21.255	304.26	293.459	287.362	281.501	250.045	266.006	175.253	205.095	205.746	149.506	144.404	166.009	196.468	228.457	195.404	194.21	175.08	206.116	306.593	393.786	392.562	190.213	165.452	173.606	254.149	271.333	344.59	213.14	206.629	211.018
evm.TU.chr1.701	25.2161	27.0716	29.5146	25.3833	26.5443	28.1767	21.0963	22.7722	20.777	15.9179	18.6417	16.4478	19.3451	19.9534	22.9143	21.7617	20.3467	20.7865	19.3104	19.7463	14.7306	18.1982	18.9156	19.5638	26.5378	16.8036	19.0791	18.8098	17.283	16.3362
evm.TU.chr3.1577	160.412	139.216	143.64	120.826	167.682	118.907	171.302	256.326	214.084	164.152	168.593	170.796	292.777	284.498	303.195	305.306	324.469	261.144	278.441	208.6	194.383	342.127	339.617	389.448	402.461	236.052	285.914	483.335	370.848	389.895
evm.TU.chr1.300	56.5822	66.2734	48.9985	77.3747	87.6911	79.6716	207.684	236.638	247.424	345.888	234.36	363.758	249.755	227.442	178.388	222.285	260.091	235.012	238.27	141.051	136.129	466.21	444.469	377.112	343.649	81.2222	364.984	301.449	296.286	353.334
evm.TU.chr19.263	157.84	203.231	195.618	260.657	250.73	246.524	184.006	181.374	182.216	196.089	154.417	179.661	107.618	142.474	122.836	224.836	220.681	152.774	184.239	150.255	232.453	235.913	216.631	222.161	107.287	237.055	195.639	188.47	223.581	161.619
evm.TU.chr2.804	414.923	326.773	369.252	479.188	350.778	372.601	433.159	404.196	394.561	501.423	467.958	461.676	427.011	443.285	450.421	560.142	413.717	405.525	486.512	474.184	528.255	323.614	446.418	331.18	535.318	374.297	396.216	489.923	449.305	631.131
evm.TU.chr1.1584	23.5665	26.9617	25.0569	32.6101	38.5703	33.5747	112.208	87.9319	122.913	106.379	70.2156	112.006	49.0283	32.1568	25.5195	50.577	62.1621	50.29	73.9926	51.9268	57.3386	83.2593	88.3815	90.5801	62.4488	25.6862	59.6354	76.8688	56.1101	58.6683
evm.TU.chr2.988	47.0893	43.5226	45.9317	49.7708	49.9989	50.4392	33.382	35.9543	33.4199	38.0546	29.9101	35.0505	27.5092	28.1202	24.5414	27.9623	26.3445	24.3836	44.3733	44.6338	39.9494	35.7774	28.9703	34.725	37.9286	28.1157	38.667	35.7946	29.4596	27.6156
evm.TU.chr13.121	399.205	395.631	402.997	387.286	384.105	384.819	244.418	288.605	306.117	239.861	286.513	231.868	330.484	388.494	350.02	333.156	326.716	355.75	333.508	369.316	433.094	258.392	299.673	283.834	282.278	325.705	342.554	291.965	276.704	270.197
evm.TU.chr8.696	26.3782	24.0086	26.4086	39.4576	42.7275	36.0871	95.7879	96.6997	92.7537	97.243	97.3528	105.845	207.414	215.58	188.753	155.303	167.217	145.812	98.691	54.588	48.8937	148.466	161.26	140.269	143.818	34.8236	103.788	122.011	121.652	131.106
evm.TU.chr2.607	24.6727	25.021	23.8931	33.8785	34.5474	35.7714	35.3843	33.1594	41.8036	33.0872	29.5101	25.0704	29.1379	27.135	22.2168	35.6474	27.1069	27.2738	28.7036	19.9276	20.0405	25.906	23.2335	28.4147	48.631	16.1408	35.077	11.4354	11.7744	13.5455
evm.TU.chr8.557	60.2749	67.839	66.2101	52.5672	61.3666	63.8385	45.6229	36.3314	34.8822	34.373	38.223	34.2373	41.1271	42.646	46.154	40.7789	41.9637	43.2239	33.833	30.8251	17.7179	40.9944	49.1359	42.8306	40.2938	45.8738	29.5214	40.0148	36.9607	34.819
evm.TU.chr10.12	114.609	146.423	155.233	126.597	119.993	114.247	84.1356	87.0404	96.8086	92.746	73.4614	81.1093	99.5776	89.6611	100.028	75.8075	72.7002	88.9568	106.054	129.095	106.81	82.5685	74.5306	75.2275	84.5868	114.401	105.628	119.565	124.238	121.562
evm.TU.chr17.154	147.085	154.636	75.0729	76.3665	67.9085	71.6403	631.075	530.902	466.023	417.041	610.853	271.862	664.49	648.092	616.763	498.421	826.036	714.576	320.092	329.972	884.859	410.911	423.584	436.084	93.9237	101.504	122.103	345.282	267.972	463.55
evm.TU.chr20.252	16.819	16.037	13.6916	32.7439	34.2149	28.9068	55.7826	40.5078	47.6102	74.5664	61.9678	68.6037	14.0697	14.1956	13.5051	18.1006	22.8279	21.2884	31.6233	26.6792	26.0199	47.8474	39.2765	41.4118	11.2975	4.18557	12.3259	17.2486	9.97723	9.04498
evm.TU.chr6.224	40.7814	37.8336	37.7899	35.0558	36.2263	34.6883	28.9177	24.6272	25.0443	23.6622	20.291	18.4753	38.302	36.4887	39.7586	30.8711	21.4182	31.7064	29.0904	35.5482	33.1815	21.9899	24.2959	18.4061	52.4207	33.9963	37.1756	30.2203	26.0429	23.9896
evm.TU.chr1.2075	61.519	74.0397	73.1262	79.2345	70.3189	77.0176	110.157	93.7637	82.9665	99.6086	67.9936	90.3352	63.9147	71.879	61.8936	61.5137	53.3078	58.9732	136.624	123.346	123.365	101.227	65.2442	89.5306	55.9267	46.8362	57.8953	98.2267	62.7191	71.9645
evm.TU.chr5.1242	40.5239	39.9331	39.2837	52.796	59.9766	50.6585	215.435	159.191	160.285	249.319	115.726	214.127	81.2354	53.872	50.6248	50.7916	54.4858	39.8558	179.708	125.236	147.238	171.406	101.978	127.171	67.3933	27.104	56.1402	99.5798	71.3669	74.2306
evm.TU.chrZ.361	172.532	212.277	188.444	273.554	241.719	267.918	171.654	140.576	308.807	298.79	244.499	292.397	286.402	347.855	271.67	175.165	187.444	159.341	128.369	193.932	183.674	200.713	224.058	151.855	196.114	166.88	180.349	193.317	229.415	120.95
evm.TU.chr28.221	285.641	271.078	309.993	307.25	285.292	295.454	271.356	387.951	304.988	335.53	327.353	278.444	559.365	774.543	639.845	598.107	674.47	549.418	473.074	433.437	636.975	316.405	362.229	331.066	432.932	303.803	492.891	367.744	276.546	346.973
evm.TU.chr14.207	256.43	258.992	268.788	252.715	248.974	246.015	96.9728	100.297	96.9719	83.1568	73.207	80.4318	87.8381	91.0661	86.7595	84.8219	78.4518	87.5251	136.858	159.126	115.16	85.7238	70.9501	90.7551	77.0835	148.211	104.068	101.63	89.667	103.687
evm.TU.chr15.11	74.5522	76.053	80.5893	92.8474	90.242	86.6912	88.2907	81.1773	76.982	101.834	76.3302	80.9432	78.4197	69.5888	85.1409	81.13	68.6857	92.7697	80.0015	76.7827	112.472	101.174	94.5858	81.1425	69.4872	26.2669	44.8743	72.8072	86.262	61.9204
evm.TU.chr3.839	32.1624	41.7224	44.7902	66.6261	64.6292	64.1431	148.806	76.4404	98.7446	194.901	90.85	127.049	15.8065	14.4676	11.5117	10.4863	12.6572	12.0951	38.1062	34.9512	33.8684	56.4964	71.5506	46.5148	43.5866	28.3954	36.7371	54.7797	55.1686	43.3545
evm.TU.chr21.93	69.2051	69.4624	65.3524	66.5711	73.2431	69.5459	55.2347	55.343	44.9105	42.7295	42.1316	45.876	61.4395	55.9611	60.5335	56.289	56.832	62.5649	63.2748	60.0091	42.6542	62.365	54.7501	61.3295	67.0158	66.8191	54.2477	63.2448	64.4698	67.7316
evm.TU.chrZ.604	18.9414	18.5316	21.2047	23.6963	22.1287	21.671	43.7259	34.2742	46.3804	42.4188	38.4365	39.8727	77.969	51.5192	77.3407	47.7236	43.7149	54.8254	28.3493	25.9249	30.8259	58.0129	29.3932	31.8682	42.7593	22.8368	34.5216	43.5739	53.9945	35.2424
evm.TU.chr28.69	512.155	474.519	453.742	429.79	204.813	222.209	459.787	433.217	426.691	224.632	359.345	410.791	287.233	311.305	296.267	284.99	269.789	158.183	550.773	598.95	694.709	215.863	134.404	191.659	302.426	232.63	457.348	388.486	364.186	178.009
evm.TU.chr20.78	98.1832	92.8271	100.392	92.9841	92.6634	96.3398	80.119	86.1256	82.0367	66.406	66.5669	74.6809	66.0932	63.7215	64.6411	63.9561	62.9047	63.9113	88.6922	98.4812	81.4806	61.0551	58.1571	62.6769	87.4685	120.054	113.29	93.9257	87.9299	82.4684
evm.TU.chr10.41	33.9259	33.3303	32.5504	27.9386	32.8648	31.1207	51.3388	53.3172	48.8757	48.8749	38.3668	39.7416	106.419	89.6127	100.411	82.9039	67.8316	90.0745	89.7134	79.2939	83.9233	106.156	83.2288	89.8182	150.858	43.0461	92.5847	102.489	85.9361	92.9901
evm.TU.chr28.144	84.9979	85.2572	87.8902	97.7165	103.32	100.731	86.673	95.1657	79.9129	101.426	95.8593	119.733	50.6124	50.7867	45.8598	55.5456	66.9848	54.6653	49.3889	50.4044	45.6284	47.7567	57.7761	61.3629	63.6422	117.372	90.139	65.9618	82.6177	68.3751
evm.TU.chr13.348	1.99026	2.69188	0.964432	2.97243	3.56084	1.95063	71.2404	47.0384	44.8612	86.2939	33.2455	50.3933	418.218	852.318	516.587	77.7422	71.617	211.418	117.83	114.928	257.653	188.305	154.062	155.766	400.451	126.147	488.516	288.02	337.861	165.262
evm.TU.chr14.73	37.293	35.652	32.0945	39.7095	36.6653	38.552	51.3268	45.7118	55.8896	46.456	45.2762	35.821	69.1299	70.2807	91.1531	84.3392	60.6201	79.3675	56.0593	50.7325	63.8926	63.4864	72.9815	65.4503	76.5099	34.6442	70.0467	50.7334	67.1808	58.6793
evm.TU.chr12.415	84.3252	89.6014	91.2041	99.1222	90.7041	95.6674	97.6929	113.882	105.147	123.933	106.562	105.871	103.1	129.053	130.565	129.362	125.092	132.028	99.3928	90.3082	135.962	119.571	114.604	103.559	119.396	91.8445	118.805	113	124.976	118.892
evm.TU.chr14.18	47.7617	50.4461	42.6591	44.7119	45.7122	55.8423	44.644	48.6092	30.4354	50.0281	36.6321	45.2948	63.0721	62.7216	53.2512	19.5938	15.6096	51.1626	26.0419	33.2307	24.7924	39.8142	23.3956	24.4949	18.424	28.1548	37.1941	94.0399	39.2144	84.9712
evm.TU.chr15.279	530.16	517.952	565.178	499.818	454.908	443.812	399.377	450.485	314.346	338.375	400.016	451.499	153.003	161.554	142.324	183.059	159.009	165.039	328.774	438.454	358.043	210.86	154.686	216.422	172.326	610.107	376.984	328.506	283.678	327.013
evm.TU.chr7.493	421.571	397.189	461.081	466.798	410.005	429.848	201.989	230.389	207.321	194.673	194.433	190.843	177.554	174.861	174.438	199.952	169.85	198.98	348.681	388.797	359.131	205.105	160.014	202.29	199.983	262.438	234.223	240.767	205.74	248.93
evm.TU.chr3.69	11.7574	15.2126	12.5122	22.5842	22.3959	17.1677	173.86	106.927	150.249	192.235	151.306	215.964	113.961	119.537	150.507	156.09	171.445	149.193	91.2023	75.1983	91.3615	141.913	143.465	127.048	152.495	43.8869	106.095	106.9	123.035	104.951
evm.TU.chr22.90	87.9782	86.3862	90.6101	127.675	109.584	124.366	134.135	131.895	88.9795	178.701	150.777	124.766	171.84	184.825	177.23	220.953	158.644	197.108	159.207	122.988	186.141	207.293	253.284	167.227	160.958	81.271	189.068	178.036	173.726	176.697
evm.TU.chr27.27	239.016	256.432	303.985	280.983	243.446	315.598	279.648	324.768	267.791	281.423	279.825	252.361	238.078	275.712	234.982	205.489	181.904	221.985	332.105	288.531	332.514	225.047	191.577	226.025	315.19	283.622	252.705	305.092	312.72	336.12
evm.TU.chr19.92	45.3802	42.0423	49.2158	51.0378	56.3702	46.3787	51.2257	53.0623	65.3222	57.9539	54.9392	62.1565	59.3873	50.6619	52.6831	44.6754	53.6153	49.4449	66.4956	53.0202	51.7958	56.107	46.3848	52.0747	45.148	48.4396	55.3433	74.3149	36.1917	68.6214
evm.TU.chr18.73	27.0203	25.6695	21.7226	24.156	24.8086	23.2782	27.1258	28.661	25.1969	25.2074	23.0203	22.0096	37.8376	36.9945	40.9961	38.9712	36.2513	38.0287	36.0668	33.9425	32.9638	35.1003	32.2915	30.8702	39.9084	24.9039	33.989	31.945	33.1977	30.1746
evm.TU.chr9.108	18.4232	18.8314	16.1871	17.2952	17.2902	17.1487	88.2805	117.675	102.807	86.7176	105.226	122.436	88.0433	140.676	115.933	156.035	183.775	155.243	101.185	67.3086	143.721	161.837	169.82	195.204	254.534	63.6894	100.011	232.805	162.987	160.904
evm.TU.chr4.673	49.0888	44.6094	40.5072	55.4518	53.7322	56.7503	76.3002	64.4522	76.3014	85.8233	81.4096	81.6705	42.9429	50.7948	44.3615	61.4871	54.7406	59.6797	43.204	39.4036	39.9676	54.1676	46.3188	43.956	29.1983	52.326	34.4784	48.1262	42.3309	47.464
evm.TU.chr12.430	494.551	474.934	481.385	411.062	413.822	439.729	293.379	282.599	212.112	233.551	264.162	235.393	233.289	258.235	239.505	276.239	237.464	279.416	339.799	427.44	353.605	199.07	209.081	244.93	191.678	384.816	317.19	290.865	246.112	262.166
evm.TU.chr3.743	68.9618	68.2773	75.6425	60.0294	57.6697	54.9182	32.1035	34.3126	31.1094	29.5543	29.8161	29.0752	79.365	80.6566	95.6006	42.7939	37.8523	56.3352	45.3994	60.9172	52.3034	38.5787	33.3554	34.4975	55.5732	70.3112	71.1269	63.7704	58.7256	49.9032
evm.TU.chr8.314	53.1055	52.1148	54.2346	57.0346	56.9037	56.4155	25.2874	25.9393	24.3216	22.5802	29.5179	25.952	20.4172	17.3506	18.4788	20.6205	18.4166	20.1135	30.9054	35.7405	27.6735	24.2432	21.9823	22.9227	23.0489	29.2831	21.8106	27.0061	22.936	25.6213
evm.TU.chr28.231	80.7878	80.4128	74.3789	121.17	129.088	122.371	113.949	141.99	119.673	108.377	119.64	130.325	146.004	116.393	124.082	131.543	149.268	124.536	92.5732	78.7955	100.047	159.307	126.258	124.236	70.8852	32.1534	51.7027	82.0243	87.0789	112.496
evm.TU.chr2.322	62.6875	57.2824	63.6438	51.4285	53.9429	49.1635	18.2107	17.9365	13.9165	15.7317	19.3277	15.2822	18.5744	15.4721	15.5348	19.7695	18.8422	21.6525	24.4386	33.8741	17.817	15.6255	19.0099	12.5891	23.8777	45.0481	35.6999	25.6122	23.8789	23.6756
evm.TU.chr4.783_evm.TU.chr4.781	29.5286	33.2532	33.6872	33.8837	37.8426	35.5637	46.5988	37.2759	38.0227	49.7451	44.7594	39.4559	77.4114	90.077	106.614	100.103	71.2986	127.788	60.1886	48.0543	55.5531	80.091	82.795	62.4678	36.0181	29.9827	15.7834	72.1219	89.5242	87.0863
evm.TU.chr17.355	190.183	182.385	191.08	189.617	182.676	179.742	166.892	166.464	158.904	163.52	134.807	121.501	108.078	105.585	113.716	117.226	118.384	105.032	208.505	181.819	197.514	129.547	114.326	143.631	129.485	137.33	126.485	151.434	144.529	140.286
evm.TU.chr30.245	826.112	944.186	1081.66	631.301	771.827	869.94	872.654	773.351	137.67	1098.79	1503.68	2111.5	293.097	122.057	95.4014	109.307	241.554	160.896	468.774	411.04	63.4202	184.807	484.965	417.02	0.22194	1535.4	493.037	898.823	1131.86	1076.32
evm.TU.chr6.537	645.326	607.49	892.125	618.535	534.809	514.795	270.198	319.679	291.867	292.295	192.051	370.025	102.409	130.707	68.0836	88.6715	74.5654	69.0526	348.201	477.679	437.127	100.063	116.597	136.768	334.632	450.186	518.796	216.262	279.992	179.412
evm.TU.chr4.955	31.3257	29.1208	30.2778	26.1877	28.1541	25.7417	16.7863	15.949	12.279	16.7709	13.9881	12.8783	13.4381	12.3265	15.5091	13.3499	9.31229	16.4851	13.8292	18.0266	12.6058	12.9703	13.6226	10.901	6.14001	16.5755	6.79465	14.8319	15.0742	12.9448
evm.TU.chr27.287	80.5328	75.3396	68.1411	59.8576	58.1976	56.4725	39.1974	28.5842	27.5871	23.2668	18.2626	19.9404	20.5846	15.7748	16.4194	9.00553	8.24494	9.29219	61.2206	61.923	44.7229	31.2104	25.2298	21.9695	15.7368	43.6352	28.5833	36.276	24.495	23.7354
evm.TU.chr27.204	11.0048	8.79784	7.32089	22.8697	22.1606	18.0712	57.5185	73.0603	67.3096	74.182	81.0644	83.8636	203.106	160.037	137.496	87.6303	159.31	148.515	114.024	64.7755	84.1393	181.91	86.391	115.613	220.965	52.4573	204.749	88.6908	115.506	101.847
evm.TU.chr2.380	116.825	125.758	117.5	160.127	168.166	161.143	220.07	163.98	215.841	265.251	177.17	225.177	107.586	93.5944	102.23	126.07	114.678	101.754	188.665	160.829	149.196	200.297	180.365	203.783	130.687	92.5175	115.919	187.413	141.125	138.613
evm.TU.chr8.484	13.5638	15.8622	12.6127	18.8036	17.1818	16.2082	17.1729	26.5209	17.0167	21.9006	32.5616	18.0637	191.962	229.245	272.007	233.669	231.468	300.553	83.8407	68.7706	112.455	129.676	121.096	75.0095	126.231	43.2126	164.283	126.622	117.77	163.943
evm.TU.chr1.1808	174.53	165.218	165.103	156.278	155.677	165.883	104.97	115.179	115.227	101.174	113.572	101.227	114.134	123.25	110.485	126.917	138.079	120.568	111.813	139.362	119.841	95.5653	106.274	110.604	86.6424	116.671	102.798	98.3219	91.7393	85.7126
evm.TU.chrZ.810	30.62	33.0539	30.9289	37.514	34.9212	33.2802	72.2959	62.6911	75.3474	71.9836	55.2734	64.6433	86.7304	89.2681	81.647	76.4721	67.0247	62.6779	77.3574	74.0966	88.4382	93.2603	90.4898	75.8271	95.9921	39.3766	88.2522	83.387	86.4927	71.8041
evm.TU.chr15.79	98.8975	96.9501	95.0363	65.7077	64.0511	62.1522	23.3601	23.4119	24.9823	21.592	20.9904	16.4905	17.9567	19.4723	19.9258	21.655	17.592	24.5545	47.0848	79.1997	36.9158	22.5683	20.3	29.8186	20.1252	124.111	60.1162	59.6078	55.1407	46.6343
evm.TU.chr26.193	81.2968	101.288	93.0336	121.302	119.749	129.523	261.499	226.241	288.961	351.848	267.076	302.387	116.982	88.2913	69.3054	80.8537	110.99	69.3092	239.176	179.585	194.922	210.375	221.384	259.239	91.3903	60.4511	103.081	151.696	105.665	87.4676
evm.TU.chr1.1292	65.5984	73.1423	75.1053	93.8309	92.2858	89.227	109.2	168.05	155.419	123.842	157.342	142.715	244.833	330.528	390.135	385.412	338.483	314.422	179.564	195.597	225.374	222.042	247.958	266.125	356.279	165.256	261.01	289.98	224.674	177.881
evm.TU.chr1.1638	62.3531	55.4027	56.5835	56.8771	54.7358	52.438	49.2831	63.3864	60.2592	45.6346	45.183	38.8517	110.192	96.532	96.1594	102.28	82.3342	117.645	74.0987	84.7599	122.453	71.6023	64.1126	56.716	97.5463	69.8371	94.3342	101.598	85.9731	121.562
evm.TU.chr3.194	73.936	74.3518	69.9168	68.4038	68.2167	64.3924	44.9911	50.6653	39.6675	37.9333	32.5729	35.9909	44.5038	42.67	42.8925	36.2079	34.089	37.3714	59.6951	67.3655	56.9013	49.7732	37.4172	56.1013	58.4264	57.5059	53.6607	67.2788	55.7829	63.5369
evm.TU.chr12.551	34.6118	36.5524	35.6942	45.4242	43.6592	45.6721	84.6298	80.5825	77.0642	66.6828	62.4106	70.4716	79.7599	91.657	91.0006	66.4767	61.7564	75.9336	51.851	47.9004	49.9885	63.5189	54.5174	58.4808	81.1058	45.6239	94.7948	69.581	63.789	68.0651
evm.TU.chr15.444	37.0662	41.2229	34.8304	37.6747	40.0138	38.2499	62.7856	69.9378	62.7923	80.7749	74.7631	74.0015	53.351	48.3083	57.6532	59.1176	65.7459	57.2357	44.562	30.3181	28.8962	54.2558	65.5992	52.6043	32.5128	23.5979	24.0184	42.3554	35.0885	38.9935
evm.TU.chr12.146	19.9154	32.0047	29.2138	90.1876	98.3894	90.792	25.9054	79.5669	32.4763	68.2536	53.4427	95.2739	39.3752	35.435	41.0682	49.2312	64.953	45.2557	19.4738	15.8008	19.124	65.6803	41.2331	53.4526	36.6596	17.2606	55.5564	77.2769	46.0834	70.9061
evm.TU.chr3.1004	20.9489	23.1796	23.7664	27.2394	28.1078	28.9821	49.3266	38.0254	40.39	64.1822	63.9696	58.4032	28.1872	28.4182	26.785	40.0913	40.4862	36.846	31.9977	22.2618	24.6565	39.7949	38.2167	43.9577	33.473	12.1928	19.0135	28.7584	26.3821	28.8958
evm.TU.chr15.262	112.165	119.197	114.971	75.624	77.132	89.9507	82.9073	88.7424	69.6577	76.4915	64.0383	82.7564	73.7261	73.3113	70.4159	66.8195	71.2195	65.5604	75.8747	97.8065	76.2963	59.3965	59.3712	70.2579	78.778	108.014	109.267	90.5426	93.1448	78.1963
evm.TU.chr2.938	107.103	108.906	110.489	127.636	125.104	128.376	114.762	129.327	101.115	117.88	114.585	122.601	140.871	153.03	136.691	129.284	132.634	121.688	109.638	115.889	144.426	150.921	109.589	128.006	189.25	89.0127	138.505	154.321	131.512	171.478
evm.TU.chr26.187	203.994	203.514	202.019	183.877	196.354	189.823	178.078	221.192	205.382	170.124	185.363	193.694	238.65	237.581	252.38	219.542	208.792	221.116	203.572	232.322	244.253	171.194	160.493	165.059	297.959	219.283	274.859	199.02	204.952	214.572
evm.TU.chr1.1927	127.452	139.606	138.731	108.548	131.463	113.752	188.245	159.573	177.636	155.677	146.844	150.19	210.088	207.365	204.459	140.754	146.631	149.485	169.306	151.405	158.31	130.726	113.95	116.297	183.113	126.107	208.003	192.607	185.444	255.998
evm.TU.chr1.1669	82.5901	78.2049	72.0415	81.901	76.4977	76.187	55.5829	52.8733	46.0543	50.8994	42.7967	48.6335	49.9445	54.4497	54.2177	55.1109	45.9215	50.789	84.4479	84.9258	73.4468	58.9605	52.8693	57.119	44.2043	72.3849	54.1921	68.7236	68.5278	85.3962
evm.TU.chrZ.550	123.033	100.068	98.8305	70.8535	67.2864	79.1622	140.422	245.111	205.1	148.974	158.935	208.26	163.118	237.068	191.485	146	197.908	157.702	108.65	98.5383	128.231	107.437	141.301	115.534	171.374	119.439	161.709	219.474	277.263	273.193
evm.TU.chr6.598	36.3308	42.2918	40.8529	42.7948	43.9768	41.8374	53.4936	51.3405	61.2201	59.0031	67.4195	49.2841	38.865	37.9229	68.3884	53.4388	32.8763	53.7832	38.9171	33.6832	56.6682	31.499	49.603	33.6396	20.0014	37.8216	30.223	44.7883	42.9372	66.2258
evm.TU.chr1.1404	25.5805	30.1359	28.6548	38.6477	42.426	32.1243	118.492	100.252	117.409	134.539	129.525	167.808	121.281	67.7896	58.5111	65.037	140.923	121.191	97.0953	47.945	45.1664	111.631	37.2585	52.4191	130.511	46.7939	55.3502	89.9881	64.5742	143.193
evm.TU.chr2.865	10.4847	11.1568	10.9158	14.1715	13.5516	13.2563	15.6317	14.7371	16.8919	15.2157	13.7765	13.4704	24.3628	28.9144	35.3479	27.1127	23.9701	26.8768	16.6286	15.8297	16.0797	19.6042	18.2549	19.7655	17.8883	26.8657	19.8439	21.8915	25.0706	22.0476
evm.TU.chrZ.533	143.002	140.804	144.136	136.822	129.192	134.47	72.2042	77.4709	107.128	94.9349	61.1711	96.1181	107.254	114.998	108.748	65.9145	56.8511	70.8552	99.2055	114.21	102.977	102.378	87.4036	67.6638	108.269	94.0474	77.3849	82.2278	105.683	78.0646
evm.TU.chr22.11	652.421	628.452	730.055	734.683	696.499	738.615	413.29	475.772	441.412	428.99	354.372	400.216	403.098	435.895	386.259	386.016	359.291	396.163	593.746	496.058	488.79	472.362	360.814	440.79	381.604	600.578	414.348	542.241	468.123	523.478
evm.TU.chr9.469	69.0748	76.598	76.2854	80.3887	86.5911	80.9125	87.1687	69.6722	80.1618	91.2356	82.141	89.0977	86.9736	79.7054	89.1596	80.9548	76.9423	84.5508	76.435	72.265	79.2683	86.351	99.4745	89.9879	105.242	77.4651	78.4564	82.8312	73.2311	79.2024
evm.TU.chr7.676	45.7071	46.1137	45.4807	47.4753	45.983	48.3734	45.2604	43.4463	39.1638	42.9809	36.2194	39.4663	44.5076	42.5231	43.7423	43.7222	39.627	45.851	48.8031	44.0454	41.5558	46.8802	39.2101	41.5902	42.3727	46.9505	46.2565	50.7993	52.0662	48.328
evm.TU.chr4.983	175.596	145.28	142.156	154.794	155.296	163.737	166.663	142.517	172.083	175.208	212.636	188.894	139.501	141.024	136.13	140.749	166.91	136.769	102.405	123.591	121.685	117.259	139.893	162.807	92.9145	90.4739	88.6697	104.184	106.54	86.7966
evm.TU.chr4.950	100.723	101.414	109.546	83.7174	80.0938	91.0452	57.8974	79.3182	54.9169	59.0056	68.0672	54.4431	73.0336	76.0964	75.6899	87.36	80.3931	73.0652	84.228	86.3848	58.4515	68.6929	74.8499	69.6922	111.41	145.088	119.919	116.748	116.233	103.367
evm.TU.chr9.219	78.9103	80.3853	77.7396	75.2523	71.7416	84.9361	59.2542	54.3961	46.1728	56.1606	57.8025	60.6603	64.0367	65.317	50.5707	81.9578	75.3525	78.9178	67.3669	74.2762	63.9555	69.2723	67.6034	72.9797	57.8233	69.6641	66.1574	77.6778	62.6712	80.2063
evm.TU.chrZ.645	14.6569	13.7248	12.163	10.6799	11.1881	10.7552	153.524	329.207	458.538	23.1218	21.2853	18.8993	170.614	166.725	130.601	29.2485	27.4465	30.8275	295.942	304.841	336.35	67.5203	33.2609	37.1712	191.096	47.1582	144.538	36.2596	34.0752	33.9708
evm.TU.chr18.167	40.6595	41.0838	37.6942	37.1725	39.5277	37.5992	38.3086	46.1399	43.8848	29.4774	31.5283	30.5302	51.0684	47.9007	51.5758	46.4279	43.5564	48.9341	47.4575	51.0452	44.9775	41.0897	37.2455	40.3462	68.2548	50.1687	59.2401	48.351	57.53	48.0618
evm.TU.chr1.2298	234.126	221.391	213.164	172.199	177.642	186.18	113.522	128.196	145.772	91.4496	89.0784	84.5246	191.514	163.693	181.475	136.82	143.606	131.845	184.037	218.792	196.532	130.724	127.401	132.044	161.782	186.138	192.238	165.854	166.299	134.446
evm.TU.chr10.133	466.757	395.573	474.729	547.496	487.108	485.444	301.1	407.064	366.374	371.321	401.893	382.322	261.943	328.554	265.283	229.624	210.093	217.719	451.914	514.688	411.232	253.01	249.723	268.056	257.76	702.974	549.694	486.551	361.772	351.571
evm.TU.chr18.419	48.7626	46.6553	45.7914	38.3072	42.1415	39.2352	57.2866	62.6241	56.7758	61.9881	52.9374	50.71	93.1575	109.198	92.9286	88.1494	82.4888	105.076	80.8898	65.1071	86.6064	96.6017	78.5179	108.154	86.9015	54.5491	49.7905	78.6092	93.2646	100.051
evm.TU.chr3.953	13.7428	13.652	11.9241	13.7796	16.3521	13.5011	35.3884	51.5372	36.3123	37.9576	32.4299	40.1038	104.825	92.0942	85.759	70.4059	73.2058	78.6616	52.9139	46.5935	51.9371	62.3648	52.2917	64.3327	127.701	32.9752	86.6779	64.5688	59.181	78.5422
evm.TU.chr24.202	101.57	120.115	106.483	123.687	121.309	110.944	124.591	102.428	131.701	125.95	102.65	106.809	107.37	104.44	86.7257	82.4526	87.8743	79.2155	121.226	129.619	114.129	132.799	107.029	121.885	111.482	87.7275	105.493	116.112	101.748	102.885
evm.TU.chr1.465	418.654	414.204	498.571	488.177	409.843	446.88	374.702	506.492	434.577	445.404	391.35	388.657	413.581	569.337	433.481	480.443	409.292	476.808	629.277	543.079	713.193	476.841	436.741	443.545	501.984	463.543	453.201	430.578	406.556	557.017
evm.TU.chr6.587	91.9443	93.9355	98.0389	92.1793	90.6532	88.8914	77.7466	85.275	81.3046	67.8992	66.2672	64.9977	78.2243	78.5027	78.8779	79.5619	70.2302	70.8954	100.328	103.089	105.019	92.1438	72.4062	103.428	92.4019	95.1541	92.9135	109.999	98.9823	111.421
evm.TU.chr10.547	3.00069	2.07153	0.296871	1.20561	1.18041	1.26886	161.603	88.3003	112.764	169.81	152.971	77.9898	782.822	671.692	933.574	874.284	735.32	907.043	564.515	411.47	351.615	639.505	738.293	510.379	391.964	98.6676	147.581	436.511	558.045	617.752
evm.TU.chr29.168	29.8095	27.2066	29.6327	29.6082	34.8713	36.0218	94.2008	90.5483	76.1942	91.3336	78.0034	78.2973	167.294	174.609	127.938	90.9162	98.3245	105.947	100.277	91.1778	81.9284	123.07	118.052	113.667	97.965	77.7969	94.4211	239.137	120.247	146.941
evm.TU.chr20.309	47.1686	50.4438	44.5537	51.3462	50.1142	53.801	91.1815	83.6942	75.0807	53.8933	78.5532	88.2756	55.3869	41.6101	30.9399	31.8547	37.656	29.7756	48.5473	63.016	41.9848	31.6854	33.3403	35.9433	82.6697	97.4668	76.2867	75.0972	64.9244	70.0381
evm.TU.chr10.411	233.533	235.529	227.282	204.048	201.827	196.663	206	188.193	201.71	156.633	119.439	132.818	121.368	133.542	112.385	145.974	109.808	88.3075	259.493	222.783	321.353	207.981	202.321	164.719	190.598	168.03	241.446	217.347	171.558	159.275
evm.TU.chr13.72	38.2695	40.2144	40.1185	32.4792	37.6725	35.2321	29.1066	29.1792	26.9591	22.6619	26.4614	24.619	24.5571	23.1067	25.4532	25.7091	28.036	26.4994	21.9691	23.899	15.1961	22.6675	23.6698	24.2149	25.7299	37.8578	24.4867	28.8044	22.4796	24.3414
evm.TU.chrZ.397	50.6404	49.6129	48.0702	48.0251	46.0525	48.2386	32.5295	34.969	35.5462	34.1994	28.8692	31.4084	45.6048	45.7395	47.2535	39.1713	36.2795	37.5287	39.1878	41.0842	41.5675	42.1193	46.1163	36.4816	43.5948	39.5052	31.7111	36.0273	44.2053	40.1092
evm.TU.chr27.59	129.681	123.322	103.35	111.14	99.2059	103.895	93.9034	100.206	92.485	80.2939	78.5003	72.37	99.397	92.7399	91.1378	86.1535	78.6912	88.6267	121.878	162.808	185.442	82.7116	67.3305	74.8068	80.6327	124.4	118.677	91.7181	97.8397	86.857
evm.TU.chr2.224	105.254	98.7498	89.4014	94.1256	94.8705	94.9695	117.593	148.866	120.832	210.446	212.015	196.192	119.243	129.066	150.999	305.165	206.604	241.724	120.338	122.802	192.048	113.649	169.917	102.195	50.8885	97.1695	57.4033	100.063	105.249	105.294
evm.TU.chr1.824	137.905	131.25	151.282	151.006	151.423	150.536	195.951	226.473	204.991	216.671	236.747	199.377	244.308	238.601	285.032	329.67	314.892	288.494	182.288	165.159	206.312	230.937	238.493	257.149	301.501	235.493	257.345	296.487	288.584	274.092
evm.TU.chr8.212	326.468	296.875	381.013	370.464	349.896	347.594	171.043	232.525	230.002	199.689	214.448	201.687	164.366	192.774	161.672	183.243	170.135	171.509	258.208	275.939	305.959	150.93	137.293	159.374	195.097	390.694	337.169	227.137	212.586	230.494
evm.TU.chr8.233	312.148	300.171	339.268	293.171	262.979	267.971	156.234	212.746	149.416	169.328	123.475	175.672	162.222	162.784	126.632	127.443	115.532	100.94	345.167	425.42	322.168	171.792	126.979	169.057	203.204	320.561	244.619	261.578	288.999	273.494
evm.TU.chrZ.642	7.68504	6.39232	9.29684	10.0054	7.84752	8.03923	19.5862	22.9427	28.324	11.9799	17.9111	12.6234	51.6373	59.9755	54.5505	33.3552	39.5167	35.0104	14.0086	15.3854	11.1275	24.4925	34.8601	21.9557	47.8082	15.8694	29.9303	21.8349	29.531	22.4085
evm.TU.chr10.394	119.977	120.873	116.932	124.858	123.001	133.683	69.1827	49.2987	48.7783	58.4733	40.8042	57.8424	24.5622	21.4149	22.726	29.3435	24.7373	26.9467	64.727	68.4819	58.6273	55.7669	33.5011	50.8265	22.2105	61.5722	35.2705	48.8083	42.8086	38.8101
evm.TU.chr29.97	70.761	51.9211	25.576	2.58801	13.7338	9.20638	262.331	2610.36	547.304	93.9562	141.094	42.9583	3.51998	2.61604	0.635701	0.0535456	0	0.274018	13.5899	39.6262	1.07791	0	0.0661732	0.10101	0	1050.56	512.286	316.896	1117.79	407.968
evm.TU.chr2.297	21.3506	22.0537	21.5387	24.3798	25.802	25.9703	18.8706	20.0011	17.5736	19.946	22.602	15.9133	26.6534	27.1175	37.3573	44.8625	44.0029	37.9923	26.4908	23.043	23.274	32.1181	32.3793	34.1909	19.4575	14.9579	21.9611	26.0627	29.2045	30.585
evm.TU.chr9.32	78.8202	85.4524	81.0414	115.723	103.487	107.832	85.427	80.1948	85.295	84.9286	71.3902	76.3308	60.0768	54.7506	63.9558	60.7789	58.9888	58.7192	97.9403	87.3663	97.1116	83.8866	66.0915	75.9627	67.7184	47.4709	63.3334	62.369	60.6562	55.814
evm.TU.chr2.889	86.7594	88.0174	111.675	84.6277	94.0889	100.042	65.4368	53.5822	13.7701	41.4551	99.6442	86.7319	23.5918	11.2562	12.845	13.5542	22.8656	18.7348	29.171	45.5534	9.0513	16.6193	44.3544	32.6089	0.0454404	181.03	69.7202	104.059	117.829	94.5493
evm.TU.chr16.294	79.8988	81.9221	74.3015	98.6936	96.1953	93.5733	98.6184	89.5701	95.808	117.703	76.3636	104.502	70.6862	62.3759	61.2563	72.8926	61.3663	70.7483	136.53	147.672	159.072	120.896	83.0701	99.3795	94.7538	63.2369	99.2818	94.0557	77.8767	85.1404
evm.TU.chr3.560	228.801	240.859	244.273	184.945	189.922	198.983	109.089	99.8849	50.2683	78.5746	100.994	101.897	46.2782	43.4072	45.4625	54.3156	56.6829	56.3258	79.9458	94.956	52.3813	51.6342	63.4787	53.9756	37.6185	156.245	79.2778	87.6425	111.321	72.282
evm.TU.chrZ.258	46.9241	50.6536	56.9857	65.8463	50.5686	68.7232	294.101	334.384	477.424	390.097	369.846	376.391	500.558	502.284	435.266	443.97	404.205	566.386	312.077	245.102	421.849	380.506	370.049	298.292	571.126	219.301	379.527	388.364	415.247	430.616
evm.TU.chr16.297	173.21	161.693	152.079	157.001	153.927	157.618	124.921	129.751	113.139	118.413	112.598	108.316	129.908	114.796	143.789	125.251	112.107	121.748	138.632	159.552	143.154	124.996	123.653	117.252	126.343	135.582	125.222	144.2	141.676	126.149
evm.TU.chr5.354	4.00997	4.04106	4.22563	3.55821	2.49956	3.06273	46.7583	41.8381	49.2359	53.1142	51.7242	37.9684	31.1749	29.3793	34.4245	50.5753	42.9417	31.2528	33.8756	26.8533	39.8045	44.3302	36.6458	35.7841	30.8168	6.10384	13.9535	11.9862	16.2368	16.064
evm.TU.chr7.185	40.0245	52.6063	46.0044	50.68	50.7124	53.7578	68.6772	61.0778	68.7661	70.0572	63.9944	68.9685	55.5726	52.6097	55.1517	92.5524	88.5829	69.6398	61.3869	48.6211	61.4596	91.7906	71.7669	87.9316	61.7211	49.552	86.9627	55.8555	54.0363	67.782
evm.TU.chr3.1563	46.4344	48.0963	38.4478	54.7901	46.9204	48.3324	60.1069	47.4306	58.5047	56.212	41.6715	47.2924	39.9419	42.4078	43.1445	37.5816	38.8536	39.3763	48.5762	39.9885	40.2606	51.841	37.4806	55.0118	27.5523	21.1174	22.7237	33.8707	23.9841	29.8025
evm.TU.chr8.145	54.575	53.9655	64.8591	53.1024	58.9003	57.5029	53.9645	59.3864	60.25	33.8488	40.0532	32.9529	47.077	48.8457	39.0824	43.6406	40.1406	41.9033	58.5587	56.2703	70.0289	37.3286	36.1729	41.132	65.4143	57.0769	80.2018	49.0624	51.0191	46.3082
evm.TU.chr5.249	39.2151	37.5238	38.9465	33.2165	32.9124	33.6461	37.0735	33.6316	34.1315	32.3449	30.7795	27.1994	53.4862	50.5308	55.2876	44.1045	40.2983	56.6896	37.8376	35.4782	34.8452	38.1574	44.526	32.2335	48.9652	26.5491	34.1689	39.3005	34.4885	31.6187
evm.TU.chr15.285	66.247	71.1483	67.9752	62.1303	65.5575	63.7529	95.4968	76.524	94.7501	104.852	98.4372	81.4172	175.86	148.907	195.459	162.528	141.53	234.118	116.253	103.516	164.958	155.65	128.762	129.829	61.1417	44.5531	23.4257	90.1189	129.344	120.999
evm.TU.chr3.419	49.6469	52.5768	52.7679	47.1851	47.9437	49.0094	53.7264	43.1159	46.9106	54.4801	38.6403	51.917	30.6226	31.9304	29.6333	22.897	23.6583	24.5594	47.3844	47.8753	41.5999	37.2323	28.1788	31.1294	28.305	57.3053	42.5698	44.4426	38.6317	46.8851
evm.TU.chr6.315	680.826	632.537	652.524	660.935	596.391	600.73	355.438	435.068	434.13	297.673	249.053	297.787	310.968	339.388	260.012	268.388	232.368	272.685	624.797	744.559	762.007	341.66	245.062	298.056	341.239	488.318	463.502	407.493	354.173	394.469
evm.TU.chr26.184	0.0565745	0.234337	0.335829	0.0974158	0.238449	0.205053	107.47	541.999	146.048	1484.91	1668.73	1989.27	140.725	106.349	54.916	126.423	361.514	243.058	25.4731	5.54531	2.90778	157.534	461.677	425.84	0.105071	81.2762	28.2808	184.955	473.224	349.471
evm.TU.chr29.121	453.431	369.333	559.204	448.118	386.742	372.874	440.769	504.824	483.588	338.314	319.293	369.314	298.387	290.452	215.331	161.962	167.842	147.981	434.746	433.295	529.794	266.664	188.355	237.232	429.875	527.876	764.925	487.452	513.978	600.224
evm.TU.chr1.2605	42.6242	40.7362	39.7165	50.5809	46.4145	48.4437	47.2423	49.7297	50.1814	48.5041	38.1624	42.5433	45.8348	44.9369	44.9773	49.2759	44.1105	48.0124	54.76	50.6901	55.6428	56.3921	44.713	51.6809	47.5303	38.1359	49.762	56.2163	51.549	54.2677
evm.TU.chr19.148	259.936	276.872	297.334	233.663	230.806	226.006	179.774	229.287	155.058	156.748	144.644	139.364	241.533	252.108	238.368	191.714	172.919	254.233	222.666	199.574	161.566	209.717	191.129	173.922	197.912	263.519	194.466	262.59	248.545	256.263
evm.TU.chr27.227	46.8644	41.5542	42.5306	52.7959	58.6241	52.663	33.1254	49.0403	44.7151	40.6073	42.2448	46.9247	61.7782	63.4624	64.2372	68.6661	55.3417	55.2484	70.4758	65.0529	55.4694	53.5802	56.762	61.7755	81.1944	65.5404	64.7187	66.4293	63.44	66.6917
evm.TU.chr14.212	81.4436	74.9412	69.0863	93.6665	91.7453	92.4437	96.6708	82.8322	87.3332	70.2943	140.578	101.885	97.7414	86.606	108.267	105.133	75.7924	127.272	55.8892	68.6492	63.8266	73.2959	79.1077	74.6005	104.414	59.6989	68.9306	67.6831	63.7161	75.692
evm.TU.chr11.275	120.27	118.506	121.616	138.038	146.855	141.278	101.648	103.449	108.828	122.668	79.2693	108.659	66.1169	71.7474	69.4003	65.5514	56.837	63.1976	148.336	141.048	150.45	123.747	68.8747	96.3565	87.5357	101.993	110.836	118.589	88.2111	113.689
evm.TU.chr2.826	120.557	112.718	117.662	127.539	126.396	123.078	65.9843	63.4592	50.3712	70.5069	62.3386	65.2068	58.6431	56.2719	71.4355	78.1425	71.0995	82.1532	72.6917	81.4193	76.9671	78.9068	80.8888	72.7126	53.2112	82.0536	52.621	74.2824	91.5339	75.0724
evm.TU.chr7.252	95.8382	71.6334	92.8049	72.8902	56.4369	64.351	59.76	58.543	51.3751	45.886	50.8707	37.7938	57.926	76.621	75.0022	47.9424	47.7451	74.229	70.8003	79.0627	58.1912	48.1601	58.1964	43.4241	74.8416	76.3417	72.7509	66.7082	66.7551	67.0537
evm.TU.chr4.36	42.7409	39.8363	49.3746	51.4106	55.0735	58.0034	203.717	152.066	179.437	198.353	193.104	211.347	58.2014	52.9789	46.0555	60.0915	82.7487	46.1339	115.912	100.197	148.527	171.476	127.803	121.314	48.5879	49.9785	55.4115	177.615	108.013	152.01
evm.TU.chr29.302	140.029	139.622	136.915	151.842	143.479	152.057	147.234	164.556	158.399	168.197	155.453	152.384	139.257	150.887	136.399	170.359	159.619	156.361	186.157	186.953	219.455	153.968	148.497	152.996	128.065	113.773	125.926	143.896	126.798	136.624
evm.TU.chr3.834	203.816	207.661	197.133	184.403	177.942	178.71	78.5726	99.6857	74.2976	75.5606	77.658	81.4191	83.9433	85.271	80.0827	77.635	68.9956	80.6548	145.013	174.147	131.478	88.486	70.0929	87.9192	82.6262	148.24	122.703	120.774	122.727	130.247
evm.TU.chr17.20	50.8693	48.4562	47.7825	49.1556	54.0355	51.7681	41.8452	52.5847	54.7079	43.9371	49.2119	53.5063	52.6526	48.9261	56.1537	54.2042	50.9722	58.4114	35.0633	39.992	36.6246	39.1108	49.5634	46.3352	60.9684	47.1633	44.9815	44.017	40.569	42.7229
evm.TU.chr29.114	527.843	523.978	379.522	27.9259	37.5499	15.4792	784.828	3197.01	630.792	2941.91	3009.93	6109.56	129.575	76.302	23.0937	1.54075	19.5021	13.9955	287.72	435.155	54.2785	9.60746	98.0616	8.90124	0.602409	3387.42	1222.43	2219.44	3914.34	2670.57
evm.TU.chr2.593	33.0378	36.0856	37.0318	44.3799	33.7993	38.8812	79.9918	62.6543	60.7618	70.5764	55.4949	62.7791	47.5789	46.1583	41.0403	41.705	40.2275	36.7156	88.323	87.3488	96.8557	83.8965	76.6585	87.0083	73.1229	39.0575	68.4883	80.318	71.9323	61.8731
evm.TU.chrZ.689	147.165	165.355	160.223	122.263	125.153	128.452	72.0031	81.5726	87.4328	66.977	62.8046	61.6871	78.6818	75.8349	80.9583	93.6703	96.3737	95.588	129.863	162.414	151.661	117.751	106.188	108.469	78.0784	140.056	116.379	116.611	122.922	102.331
evm.TU.chr23.339	179.484	181.782	197.9	195.629	199.738	195.899	108.912	114.483	105.902	96.1522	102.292	100.479	109.152	129.05	109.54	102.332	99.231	106.266	136.417	138.414	125.422	98.1102	94.877	100.865	106.026	140.52	106.147	112.865	109.903	126.971
evm.TU.chr1.2816	6.14056	6.64957	5.77405	4.48733	4.10415	4.08645	67.3751	69.1148	71.1885	43.9265	40.4821	33.5346	42.3854	48.6866	23.505	19.7846	21.8271	22.9593	33.5325	28.0316	48.4776	19.8397	23.54	20.5948	66.8685	28.1382	74.1966	26.2012	28.2252	27.4353
evm.TU.chr22.182	0.535195	10.1269	0.914575	0.167555	0.205066	0.132259	304.545	427.247	630.406	6.65679	9.62556	0.461234	775.105	966.102	403.288	9.53341	7.68902	12.729	549.371	536.022	941.597	46.0188	28.276	13.9786	1977.51	145.6	1004.35	101.844	43.4982	74.9126
evm.TU.chr15.81	107.843	107.859	111.019	90.9908	85.6934	92.0797	69.2706	72.7288	60.1955	58.4934	64.2063	61.2156	56.8656	57.4852	57.6926	51.8425	54.4323	70.3762	70.1168	76.9497	61.0405	57.7586	45.9344	56.0836	49.3721	111.724	80.0396	88.4496	80.9187	75.9619
evm.TU.chr27.305	83.1788	81.1796	81.191	101.363	92.1572	89.2979	88.0919	80.3736	87.4666	84.6166	87.2348	82.2034	89.2902	88.1435	93.4371	95.2196	99.981	93.6354	82.5698	79.4039	84.4752	93.855	110.532	92.3793	87.6217	61.9329	90.7323	100.953	82.7392	84.0215
evm.TU.chr2.945	83.1561	86.0232	86.3985	97.0332	93.8246	94.9923	114.727	113.259	112.538	108.295	104.41	108.362	101.466	99.9588	104.158	102.301	88.0846	97.8621	113.086	112.081	117.842	115.728	96.3691	98.7508	120.004	98.009	114.943	106.395	118.861	113.413
evm.TU.chr21.241	18.3296	18.9985	22.1472	18.168	20.5293	17.8184	54.9846	76.667	84.0968	40.1697	36.9293	30.1164	122.249	112.601	103.35	75.2547	66.5267	102.203	92.4713	74.0337	85.7137	78.8173	77.0841	55.4251	141.588	54.8368	112.106	94.1291	76.0799	102.203
evm.TU.chr8.543	504.237	480.403	406.024	273.505	320.404	347.838	120.937	165.649	153.901	145.115	125.505	116.499	110.159	122.823	130.535	123.232	132.284	128.409	183.075	245.187	177.222	130.959	124.566	128.761	134.864	356.021	230.707	191.211	221.774	194.346
evm.TU.chr11.248	149.266	140.379	154.024	147.676	139.743	135.223	128.129	161.911	117.397	127.976	104.046	125.43	103.715	116.216	103.337	109.606	100.883	97.9222	139.494	133.248	136.389	110.058	92.559	107.369	121.137	177.141	144.863	149.229	140.32	142.096
evm.TU.chr18.311	23.0585	23.6139	22.5283	23.5582	25.9949	24.139	32.8256	38.0073	31.3209	28.0741	33.9131	33.8361	42.6478	37.0773	36.1601	26.6315	29.6886	34.1389	25.9211	25.1824	20.5214	29.282	31.7366	30.5365	35.5321	29.3416	27.2024	37.9612	30.8199	35.3417
evm.TU.chr4.883	174.27	162.629	146.799	185.834	190.401	198.469	285.465	246.552	239.611	260.76	266.576	294.561	257.135	196.479	261.036	240.988	252.129	264.606	162.574	166.044	191.949	202.966	210.317	212.936	214.512	120.268	159.698	151.048	202.977	178.609
evm.TU.chr22.86	354.541	349.082	389.866	361.725	338.408	375.815	220.555	256.612	224.424	232.055	206.484	206.43	216.749	231.752	197.248	190.424	176.658	206.077	311.598	282.118	311.454	225.158	190.77	231.185	203.343	389.828	270.683	300.329	283.745	326.712
evm.TU.chr3.706	95.1075	79.7575	77.5951	108.674	134.981	114.469	105.268	103.331	99.3637	105.055	123.879	143.545	155.991	135.039	157.066	211.125	301.029	168.349	133.808	121.915	129.257	168.428	139.616	161.152	172.293	68.1754	102.496	101.898	110.027	124.659
evm.TU.chr1.2449	167.993	123.805	174.946	109.711	117.08	114.74	46.132	47.4244	27.4289	64.7524	62.541	65.0176	32.2409	43.2508	32.8525	42.8306	41.6739	80.3814	31.7979	43.0859	32.2796	37.0555	44.2866	35.2702	28.496	65.4023	27.1176	52.2125	70.1946	78.7531
evm.TU.chr3.1662	87.9595	88.4591	91.4154	78.649	72.6133	75.155	69.8963	58.7089	66.4459	40.2609	55.6811	41.1245	74.3265	79.5355	66.0167	60.6671	67.0063	59.8294	69.8206	84.7405	80.6864	44.3364	56.4232	43.2251	77.9785	82.534	74.5296	64.1007	68.0707	60.4739
evm.TU.chr23.68	282.042	263.921	247.727	240.289	244.657	233.671	85.5662	79.8129	80.0542	78.2437	63.2021	69.1971	80.6195	79.2919	78.3646	60.6671	61.2027	67.6873	168.572	208.713	117.25	87.5713	77.3563	92.4795	72.2468	167.824	86.1386	110.68	113.193	110.053
evm.TU.chr4.550	56.0944	57.1124	53.5576	57.5682	56.8072	56.7569	60.6626	54.6512	53.9319	57.1254	45.8244	56.0294	51.0206	45.4052	46.0966	45.1361	42.1993	40.9355	79.1819	69.9186	61.6813	68.0219	51.2454	65.6099	55.2568	41.8337	45.8403	55.1417	46.876	60.919
evm.TU.chr1.7	139.565	129.62	118.562	105.607	107.003	114.061	167.655	156.156	139.744	165.606	204.372	190.939	128.217	140.295	130.657	170.72	160.48	170.692	131.416	142.924	174.741	163.138	148.697	156.282	171.879	132.979	158.9	156.2	166.581	154.975
evm.TU.chr3.1010	12.2332	7.3056	8.41006	4.40387	4.51124	3.9823	13.3185	25.3962	12.6312	13.3317	17.701	9.68068	36.1566	39.8449	41.7241	34.798	29.6042	39.3967	17.0764	15.7267	12.8313	13.7716	28.0698	15.9208	6.46345	23.5948	10.9537	37.3004	31.0959	26.8692
evm.TU.chr25.137	12.3937	12.5773	9.02453	18.0116	16.7993	18.4174	45.7296	109.215	57.112	80.4377	112.837	94.9323	527.996	387.548	511.251	266.953	312.725	526.612	191.418	172.353	223.277	209.881	124.466	100.451	191.554	90.0619	196.369	274.649	139.42	263.135
evm.TU.chr29.90	0.264527	0.0456541	0.130854	0	0	0.239693	256.979	811.476	95.2134	1183.05	1659.44	2206.97	71.7122	23.4746	9.60332	23.4815	96.96	32.473	9.0747	0.705534	1.21205	19.701	193.866	82.3704	0	18.0035	5.28121	50.6425	163.268	91.0496
evm.TU.chr5.801	156.697	162.024	240.448	298.275	337.22	299.227	93.5992	282.912	65.8435	63.8445	41.492	51.1567	30.3801	19.1855	26.2132	15.4763	9.58492	17.1071	109.996	140.35	273.7	107.424	39.4423	119.375	62.5358	100.69	28.1091	173.925	46.5354	32.2323
evm.TU.chr4.755	5.92513	6.05511	6.56973	9.05104	12.3358	12.9501	34.8819	34.519	58.1446	32.8451	25.9405	20.8977	39.6082	38.1909	71.3507	38.1871	35.9645	21.6473	59.0185	53.367	65.0971	65.2281	67.5624	60.5929	265.172	84.8142	319.038	118.776	110.119	108.457
evm.TU.chr23.219	606.249	635.471	606.196	523.954	553.668	558.851	369.406	238.813	97.8292	253.371	336.266	419.156	56.8484	39.9078	34.5826	29.2972	57.6603	55.0405	213.145	330.701	89.3867	49.7083	103.496	69.9559	0.642459	851.119	332.081	366.978	474.611	429.659
evm.TU.chr2.896	80.3631	79.9329	87.6096	81.5322	76.2667	86.1964	48.5765	48.1272	44.9483	50.053	48.1012	46.1234	40.7571	38.2639	40.641	45.643	42.0108	46.5903	55.037	58.1972	51.8843	46.2751	44.2358	45.4216	39.0339	53.6343	44.639	46.2284	45.5578	45.5489
evm.TU.chr3.1262	56.6096	54.2067	52.3526	50.1113	51.8728	54.0993	27.9805	30.189	25.6113	26.3253	23.5967	23.9054	32.3515	29.1872	26.0795	23.9794	20.6978	25.0274	40.73	43.4216	34.5189	27.8869	25.9249	27.052	30.7141	43.4495	36.4453	37.328	31.5655	37.8053
evm.TU.chr29.96	11.7787	7.75324	1.53569	0.0786117	0.153937	1.07557	184.127	4169.73	979.845	199.53	283.358	75.0896	3.75892	5.49018	0.675837	0	0	1.24851	4.86633	12.0548	1.41881	0.468089	0	0.0767055	0	1381.16	757.641	531.121	1708.33	582.191
evm.TU.chr1.2584	109.125	106.832	109.465	82.6855	86.0786	99.1628	114.063	171.998	164.271	101.541	85.5465	115.651	220.791	242.677	176.953	128.619	133.857	150.989	128.582	145.099	119.403	97.2646	92.8927	105.971	296.266	264.134	394.884	193.078	155.254	164.986
evm.TU.chr37.19	25.5171	25.6202	26.4745	21.0197	22.577	23.5339	22.7651	20.6973	20.7687	18.9595	18.1891	19.3287	24.8063	19.722	23.1447	20.9238	22.4839	25.4518	18.6122	18.4149	17.9139	21.1991	20.3039	23.3035	20.3584	19.2806	16.4022	18.6187	17.7331	18.5513
evm.TU.chr17.29	63.3581	59.9449	59.6953	35.9077	46.7321	44.4256	92.1077	193.444	114.467	182.81	232.708	257.609	110.556	86.8423	110.131	104.943	131.199	90.7367	68.2455	91.037	97.2519	104.787	82.8762	125.453	114.548	91.315	97.4881	166.028	175.813	151.243
evm.TU.chr1.1712	1.26055	2.43555	2.2813	2.21025	2.2418	1.62973	37.6902	59.0259	40.8353	49.7226	37.2702	48.5097	90.1741	87.8228	112.532	88.9812	96.2217	86.4615	44.4537	43.4353	47.3881	76.2064	76.5648	71.8152	127.091	37.6458	53.9333	94.3817	90.3259	141.017
evm.TU.chr13.363	33.5943	32.6212	31.8295	27.8768	30.1667	29.2087	21.1539	20.0733	17.7488	16.996	20.0409	20.0268	19.0944	17.2168	18.4599	19.6663	21.2138	20.117	22.4197	24.5284	14.9748	18.1437	19.4227	21.3123	19.1667	27.5675	18.9323	21.5969	19.9733	21.308
evm.TU.chr1.1236	17.4948	17.0638	15.7123	15.0555	15.8021	14.6592	12.2622	12.0452	11.5193	10.8914	11.3432	10.0051	16.1457	15.0901	16.1702	13.8432	12.6754	15.1687	14.2185	15.4879	12.8901	12.4707	12.7005	13.2867	22.3702	14.0646	16.6695	15.4803	13.6968	13.8791
evm.TU.chr8.27	227.887	292.693	278.857	299.876	311.156	316.643	110.896	76.7065	80.7266	128.806	134.884	137.493	52.3909	53.0218	61.3907	90.942	112.392	84.7517	78.1279	79.4609	45.8795	100.676	124.377	110.534	44.0854	102.093	64.0904	108.282	93.3698	86.851
evm.TU.chr7.259	159.403	154.198	165.441	199.391	183.184	202.057	133.26	143.577	161.421	206.051	203.761	206.691	125.608	141.385	141.874	235.007	236.505	179.524	111.492	116.497	142.862	139.009	160.096	171.39	77.2413	134.658	137.287	154.765	113.834	112.633
evm.TU.chr1.2118	97.2678	93.908	86.8636	71.0546	68.3952	81.2213	73.2723	67.9196	76.1924	63.8408	86.3606	61.769	81.7071	80.4044	84.9185	88.7172	94.2607	79.8517	65.448	84.5039	81.7315	54.9561	69.9967	74.4195	59.691	68.0878	61.2025	57.7074	66.6876	52.3889
evm.TU.chr24.79	6.51263	9.39737	7.82956	10.3639	10.676	9.68622	70.2338	63.13	75.004	62.6857	53.0766	55.8243	71.5812	83.3169	63.2476	61.2733	82.8827	71.8857	52.8296	37.9083	44.2183	78.0624	69.0104	52.5472	45.9526	13.5751	35.124	74.0497	31.3249	60.894
evm.TU.chr8.554	730.906	616.997	479.956	367.149	368.401	500.257	116.633	299.413	124.939	152.037	205.081	192.687	11.2723	8.4994	15.1867	13.2377	9.58969	9.6175	89.2339	204.924	46.7151	16.1207	26.1075	45.5773	4.79135	254.328	102.849	69.6168	68.7303	45.922
evm.TU.chr25.216	49.1775	54.0799	53.4424	54.2444	68.5056	51.8477	61.1535	51.5633	49.2588	49.1484	46.4948	72.6946	72.0182	36.0846	40.0705	80.4544	209.848	81.3075	113.734	57.2878	52.0041	82.1245	74.5497	80.082	49.141	84.7301	50.4902	78.6126	104.427	96.2121
evm.TU.chr1.1802	443.983	436.433	473.622	391.59	352.044	380.654	360.907	320.119	346.47	347.744	257.333	298.552	179.269	194.929	179.628	164.297	153.989	197.333	438.305	401.655	454.283	296.838	226.93	295.534	175.11	328.396	243.667	309.633	279.063	285.628
evm.TU.chr8.285	117.366	129.621	127.703	108.921	107.45	109.91	141.346	104.935	87.5981	95.5125	126.582	116.464	95.7322	85.296	72.9487	71.0985	81.3201	89.9906	83.3126	84.4297	77.4367	61.0215	90.9608	64.9284	110.002	252.788	163.611	138.822	169.811	112.999
evm.TU.chr13.14	41.5294	40.1894	40.5118	41.6067	43.79	43.0937	32.9155	34.1401	31.2582	32.3452	32.8679	35.0089	40.7836	35.8695	39.2384	40.2876	39.0411	45.3113	33.3934	33.7112	28.0944	35.8291	32.7584	37.3985	34.8354	32.0626	28.0884	34.8205	33.0665	35.2093
evm.TU.chr2.513	192.305	202.65	240.014	270.528	282.599	260.701	84.1438	73.229	103.438	90.6324	69.9265	76.5631	65.1114	68.2258	93.4708	56.284	48.0921	45.3374	99.1111	98.7056	99.6889	63.5506	53.471	65.4908	90.3614	72.638	72.4444	59.1919	46.7033	58.6943
evm.TU.chr28.119	58.1424	53.7257	50.6866	45.3991	52.2201	50.9654	42.0919	45.2795	41.7246	31.6779	39.3568	35.9576	49.478	51.6135	51.5225	51.997	47.4599	65.6711	54.4747	56.6143	59.922	50.6182	46.9319	45.1338	54.9153	47.2412	47.2022	45.1135	44.2341	48.9853
evm.TU.chr17.448	3.58794	3.53249	3.24388	6.73887	6.68177	6.4922	26.2682	24.3212	33.3223	34.2086	27.0441	20.4733	69.3944	62.3278	85.5194	94.3831	69.6316	124.94	49.6367	34.4837	62.9965	61.3872	85.1936	46.5754	24.2658	6.029	12.1181	31.6604	60.3607	44.2378
evm.TU.chr14.289	119.151	118.533	126.373	119.305	110.931	124.154	54.4693	47.5661	52.6903	48.8768	39.5285	39.9122	30.8601	35.1018	33.1199	30.5163	28.0382	28.6617	66.503	73.3096	59.8576	36.2575	37.9388	32.6328	31.7694	59.0507	43.4228	39.9501	36.4202	35.9007
evm.TU.chr23.117	204.071	187.845	199.575	192.302	211.582	191.979	114.735	102.278	94.671	84.7808	98.6181	99.5251	89.3681	74.584	81.1101	68.6578	66.6662	91.22	131.999	157.62	109.918	98.5609	83.6339	86.0363	100.647	116.547	93.2018	111.837	88.0557	98.5358
evm.TU.chrZ.716	30.8987	31.6891	27.5357	32.6914	33.832	30.8436	31.7034	38.321	33.8248	38.6229	46.8484	34.3288	55.9576	61.1195	58.1272	59.0043	47.8783	82.0537	47.003	37.434	47.8989	48.1734	59.3507	39.7097	47.4426	39.982	41.5282	49.8097	53.533	49.813
evm.TU.chr5.1129	52.4115	47.6634	48.3082	52.6523	52.0725	51.1356	53.0968	53.2958	46.1983	47.9728	34.3335	43.2047	46.7171	50.2956	46.5941	40.2858	45.376	43.172	49.7247	41.849	41.234	45.6842	38.8621	40.0971	45.5085	31.5911	35.8604	41.6777	39.9398	38.8585
evm.TU.chr13.33	22.8283	18.4593	21.9699	17.1747	18.7546	18.8425	18.4385	18.746	14.947	12.3558	18.2622	15.2069	16.1924	15.923	17.287	16.493	13.5348	17.818	12.7115	12.3164	10.7905	13.3574	14.6398	12.7758	21.4027	13.8869	12.875	15.0643	12.0654	12.6272
evm.TU.chr10.358	30.2866	27.5046	29.5714	32.3955	29.1697	28.5391	12.3153	9.30954	8.95669	19.1892	8.69546	8.06697	4.29469	5.74605	4.73016	4.49965	3.00734	4.46905	11.573	9.04603	10.3987	12.022	11.7657	9.31309	7.98813	3.74281	7.1821	9.66218	12.1368	8.63328
evm.TU.chr10.633	43.9605	43.2586	42.1878	46.2932	49.9091	44.5513	37.6559	35.0699	33.3105	31.4446	33.6201	35.9649	43.0705	40.0463	42.3252	42.4406	46.9525	43.658	33.6423	32.8171	27.218	38.2081	36.5622	37.0777	37.6907	38.9385	31.5799	33.0876	38.079	33.4935
evm.TU.chr1.1100	14.7232	15.6794	14.6283	13.6663	13.6274	13.9568	53.6145	55.4951	65.1514	40.4018	41.0605	39.2056	42.1394	49.0094	45.9748	38.9019	34.262	46.5932	34.1301	31.8154	39.509	38.2841	45.7511	30.5174	49.6488	43.5241	63.7022	38.9457	48.8403	35.163
evm.TU.chr8.126	52.4145	59.0803	56.1546	64.0118	61.4706	62.3676	73.8281	71.7654	64.4124	71.1113	74.0376	71.4628	74.912	71.9757	88.5385	100.246	89.4281	99.7116	70.3065	72.726	76.4499	89.4238	83.3612	81.998	83.954	66.1214	70.647	80.3307	98.6493	81.7527
evm.TU.chr11.36	5.20257	5.02315	3.78878	6.54046	6.59027	5.87598	13.9417	14.7025	14.3763	12.9008	14.564	11.9602	43.1313	39.7513	44.2252	38.2164	28.6068	36.0164	17.0476	15.9113	16.6959	24.887	22.0564	20.585	41.8367	9.08573	19.7677	17.259	16.9818	17.1703
evm.TU.chr29.80	43.6297	41.261	22.0228	33.3468	29.2722	21.3804	228.471	265.889	354.865	554.212	469.312	320.226	835.953	843.579	957.037	996.25	1053.88	860.367	1373.32	520.089	1668.53	1882.15	2391.83	1731.82	533.103	347.994	959.425	1443.11	1055.34	1585.4
evm.TU.chr3.1062	47.0944	48.6674	47.8214	43.5287	44.4572	43.5986	49.6599	48.3356	45.0288	46.9985	39.0992	43.7682	59.2967	55.2555	49.7388	53.2174	50.2723	48.6046	51.6456	50.499	41.872	49.8377	46.4278	52.132	61.0356	50.5744	51.414	52.562	47.9759	52.9653
evm.TU.chr22.53	25.1998	23.5227	24.4197	20.9847	23.9315	22.1085	22.935	21.4102	19.9739	19.4449	24.4568	20.7393	27.7024	26.7806	28.1727	27.8292	27.3085	31.2244	18.2606	16.9501	15.5767	18.6329	24.9128	22.2396	25.0518	19.8752	18.4958	23.0883	17.1052	19.585
evm.TU.chr7.668	8.56977	8.45221	9.07745	10.0848	10.8654	10.6455	31.8111	34.8162	28.9303	31.2109	34.1355	30.4651	68.5248	73.8437	79.9292	62.3575	46.4362	73.6938	35.586	28.2994	49.0038	51.6827	54.0199	41.5033	41.7362	14.0638	20.3316	38.3146	64.9863	61.7527
evm.TU.chr3.1087	206.328	206.983	203.033	220.126	209.724	212.175	98.852	82.4299	87.0486	84.5205	87.3824	86.1262	69.0405	72.2435	74.0128	99.4176	92.4415	90.0633	113.923	141.36	115.686	81.863	87.4638	88.0191	57.2987	126.56	71.1483	77.9558	76.9944	62.0345
evm.TU.chr10.218	122.232	124.892	135.721	114.39	111.334	113.639	54.637	68.8311	60.4436	52.2761	50.23	59.0651	60.8916	65.5906	58.0078	58.2893	52.1718	68.0182	78.7189	101.263	83.055	65.3797	55.1702	58.5485	54.1552	114.25	80.3817	78.1786	71.0737	76.7376
evm.TU.chr4.75	309.157	306.935	361.914	285.208	275.528	291.834	120.582	141.473	136.194	134.527	113.07	125.664	148.206	158.819	153.323	152.483	152.963	144.294	212.592	235.004	190.039	124.075	117.436	130.309	117.613	246.645	171.662	170.981	141.805	192.502
evm.TU.chr6.362	33.4285	32.1074	28.7252	49.3815	50.8919	49.2067	38.4273	45.7097	41.4288	52.2892	68.1883	51.6576	40.0547	40.493	47.439	27.1077	21.8422	41.2218	39.4359	40.6797	40.5386	38.0992	40.036	30.2173	50.1856	33.9303	41.4167	49.1874	43.7188	42.7956
evm.TU.chr1.788	241.798	259.333	293.182	285.679	290.994	311.232	247.064	251.401	220.303	230.776	330.708	288.574	187.057	201.552	211.247	202.334	157.285	242.465	169.064	166.741	161.139	182.188	179.422	168.453	168.675	188.204	161.461	176.363	164.335	169.715
evm.TU.chr12.34	130.891	129.432	125.119	126.039	130.863	137.743	153.128	145.882	179.174	139.133	134.357	131.724	150.882	143.351	153.364	143.947	154.106	155.141	172.098	163.045	227.96	140.44	139.595	130.215	95.7122	69.7115	76.0233	100.041	97.3431	94.7668
evm.TU.chrZ.952_evm.TU.chrZ.954	25.564	27.1619	24.3627	28.8252	28.4901	26.6185	25.7073	20.458	20.8118	18.5376	13.5893	14.8232	19.5335	17.0785	12.5363	9.56505	8.06183	9.13636	21.3281	17.9425	21.3515	17.4684	12.2886	13.5995	17.2476	18.4291	24.6884	23.3223	18.9347	18.1142
evm.TU.chrZ.939	392.57	382.323	401.842	337.606	299.02	294.591	321.453	463.248	850.926	208.411	141.476	186.258	228.387	270.407	146.485	128.564	88.2146	102.988	445.395	505.421	588.935	219.769	161.177	149.736	624.687	1650.4	1193.27	634.844	1009.66	585.524
evm.TU.chr6.251	52.1612	55.8165	50.9462	44.1868	43.4534	43.3604	45.7936	44.1681	43.5381	30.3721	33.5915	30.0966	26.9113	32.4533	23.6637	39.4241	35.8335	34.2097	24.6317	22.3512	22.6788	23.8946	28.7007	25.9486	21.091	12.8315	13.6742	20.1403	15.7682	20.4454
evm.TU.chr1.1159	50.5801	47.7296	48.5908	47.5667	49.2116	52.0299	35.8547	63.3158	52.6938	38.7086	37.662	32.2735	74.6815	100.322	71.757	52.6083	49.6962	60.4429	50.2525	54.336	65.5625	38.9333	47.4266	37.155	194.884	36.927	114.892	53.0573	49.1167	58.74
evm.TU.chr1.2813	309.292	333.42	356.141	355.382	343.958	344.752	210.548	238.316	237.984	205.956	202.983	181.913	238.317	237.603	221.087	251.892	241.247	260.337	311.682	329.481	362.022	227.936	229.739	221.966	195.515	280.318	249.733	229.951	251.381	216.061
evm.TU.chr2.664	108.571	105.032	103.269	109.162	110.816	112.785	66.4437	73.9258	74.0197	62.761	60.7222	57.4193	103.665	101.372	102.714	83.7292	86.0529	97.3144	104.775	103.846	116.712	87.6974	86.3079	80.9677	76.916	91.6969	72.5555	80.6533	87.8523	90.9779
evm.TU.chr5.1004	35.802	34.3304	37.4737	35.1653	36.4701	34.0653	31.0526	32.1002	26.3528	20.8557	26.3871	23.8705	33.6093	32.4754	35.9331	31.2263	28.8994	36.3877	24.694	22.4621	17.3856	22.3274	27.1299	24.3638	27.0873	36.7256	26.6302	30.8174	32.102	30.0119
evm.TU.chr30.66	35.2706	32.9356	29.8132	29.3309	29.5683	30.2695	32.8353	31.4151	30.6521	30.6746	32.5841	31.3493	43.0627	39.7728	41.7451	49.8389	52.9781	48.6689	33.0467	44.3893	37.3104	43.2748	42.8825	46.7007	38.2792	23.9787	27.8894	33.3859	31.5881	30.8638
evm.TU.chr21.115	41.11	50.4316	27.7439	41.6082	44.0431	45.9336	77.5325	74.4407	79.2853	103.082	83.9601	89.343	75.5973	66.5426	62.5722	69.2758	54.6432	65.9875	74.4461	68.7713	70.534	64.508	59.9064	66.7709	132.978	36.7117	77.9786	38.5812	44.2905	38.7537
evm.TU.chr7.426	7.97719	7.65645	7.86861	23.0026	21.6085	18.3836	79.7963	46.3287	77.4015	72.3069	93.1344	80.0387	73.3812	92.5303	75.2604	48.504	55.3151	63.6446	41.7274	36.1302	47.9171	54.9437	53.3378	56.022	45.585	5.41847	12.315	20.3875	17.1667	16.0277
evm.TU.chr4.689	16.0624	16.9426	15.0138	23.0511	21.0994	20.4232	42.0733	34.3976	33.8233	42.291	43.6101	41.5859	35.5146	34.8995	33.9052	42.767	37.735	36.2782	22.4233	24.4568	27.4886	35.323	44.1445	33.0644	47.9024	48.325	54.8254	54.9222	61.1227	47.8251
evm.TU.chr17.191	23.8038	23.2804	22.6699	20.1541	23.5305	21.2171	21.7063	18.0218	17.1852	20.4178	26.8825	20.5818	26.8324	20.072	25.9849	27.9869	26.2018	28.6845	19.6623	19.7096	14.1476	18.1219	22.8075	16.5071	29.1565	16.932	11.4246	22.5981	15.9507	24.7758
evm.TU.chr1.2488	24.2743	23.7951	25.0784	23.5903	24.5896	23.7626	16.0233	13.8334	13.3599	13.1403	18.0995	15.1609	13.1555	11.8075	12.4169	11.9782	8.82355	13.3776	12.4174	14.4428	10.6636	11.1048	11.7176	11.0773	11.975	14.4153	11.6139	12.1158	9.94031	11.3112
evm.TU.chr2.890	79.9314	76.5755	77.0858	73.9682	84.8406	82.5214	48.9014	38.4264	10.8478	40.5094	68.3155	65.3054	22.6724	12.5368	14.4129	15.897	20.8577	21.6674	26.718	46.5329	10.4727	18.8329	45.4916	31.2714	0.0464925	141.237	60.9832	87.067	102.873	74.1914
evm.TU.chr7.89	75.4978	68.6504	81.2874	79.9325	81.9471	84.4766	34.0534	25.3423	19.8717	28.9204	55.0203	36.8759	19.8929	20.1862	21.8106	34.7636	33.0305	39.2129	28.029	36.7307	22.4105	23.6127	32.4699	26.5038	2.19628	48.6785	21.8925	30.8248	39.2158	32.3769
evm.TU.chr2.1347	55.7982	52.4489	43.8703	54.3388	54.6151	57.8815	43.8481	68.4781	60.6013	54.3319	57.5049	61.1573	121.204	109.535	140.377	161.092	143.925	143.408	98.6517	85.4251	74.4097	92.0449	108.218	98.7576	89.515	56.0562	71.2492	83.8406	75.2395	76.0207
evm.TU.chr17.458	25.7384	28.4988	28.2566	33.4364	35.19	33.1826	40.0501	36.6755	50.3546	31.837	27.6861	25.5116	74.2407	64.0574	59.2484	54.8893	45.7369	42.1399	44.7648	38.3112	47.8563	45.4316	39.8991	40.5922	141.095	17.74	58.9065	36.6145	31.8868	39.8369
evm.TU.chr2.605	93.7681	99.2067	101.211	89.1812	87.3316	89.2264	40.9456	45.346	37.5356	38.0962	35.442	33.8427	40.474	41.0233	37.1969	36.0682	33.4364	41.5145	73.9213	98.8653	77.1865	42.9442	34.5601	41.4621	39.2095	70.6977	59.0344	60.1885	50.2693	56.9341
evm.TU.chr14.177	37.6985	35.4806	32.7944	33.493	37.0251	35.4629	99.6674	129.108	83.0345	47.2708	59.4804	53.7874	156.243	117.398	112.57	62.7591	70.8379	81.8712	92.9694	83.9856	73.5217	64.0189	68.8018	57.5182	320.136	209.923	280.279	180.963	204.651	204.982
evm.TU.chr5.1245	71.8409	71.6195	74.2734	64.8997	58.1323	62.0417	41.2412	56.9263	47.1137	41.0393	52.3685	41.3703	52.5133	52.0028	45.982	58.1034	60.4605	48.1305	53.6232	62.2006	57.2777	42.8371	53.1174	51.8427	33.0059	72.4022	47.4639	46.2229	45.5026	41.3106
evm.TU.chr13.439	44.0714	45.159	46.2934	35.1866	38.1521	38.1717	34.1079	30.1616	29.5946	26.8957	24.518	24.3835	34.774	33.1891	31.718	26.2002	26.7615	29.5555	30.0546	31.9372	26.7323	28.3316	27.5032	31.792	30.8831	35.977	30.783	34.0901	32.8305	30.5114
evm.TU.chr4.708	73.2325	110.934	94.4951	164.873	171.218	134.319	114.843	86.997	68.2465	76.281	97.8827	54.9022	21.6472	19.4894	18.9936	24.2092	31.6184	29.9146	70.9432	65.4289	153.778	28.832	32.9364	43.946	37.1899	13.1713	30.2635	31.087	24.8359	22.5269
evm.TU.chr7.669	78.0972	79.3613	82.7886	99.5914	91.0552	97.5475	50.1633	46.3109	39.7015	45.6712	45.8139	40.3715	81.1403	80.1235	80.531	92.5128	63.9393	116.956	64.7689	70.567	75.0438	62.249	64.1884	47.1141	149.403	76.4655	102.474	103.014	107.193	114.479
evm.TU.chr2.68	57.4297	59.0028	54.5366	56.97	59.5565	59.1685	33.5734	27.0243	27.2996	25.6436	26.2676	27.82	27.3652	26.9175	29.7851	26.6596	27.5866	26.4179	28.0486	32.0438	22.8257	29.0952	27.3195	28.9775	22.6203	28.7902	22.9538	27.8237	22.856	22.6315
evm.TU.chr21.258	243.215	237.332	243.288	250.996	240.956	254.168	93.6469	114.867	106.091	108.519	101.181	110.205	92.6309	87.8553	89.4773	93.2667	89.2622	93.3142	161.448	204.085	148.78	98.204	85.7992	98.2441	104.469	143.107	104.461	107.874	122.419	125.801
evm.TU.chr18.43	65.6275	67.8413	72.0256	73.9008	65.2014	66.0355	31.2952	36.8173	31.838	31.9207	29.2134	28.8709	29.3143	30.1679	26.0294	28.0669	26.7114	28.047	52.4359	56.6956	45.6683	33.7453	26.9702	31.8102	31.5737	38.838	34.7838	36.8691	31.6958	41.5843
evm.TU.chr21.296	70.5361	50.2461	40.2514	32.6463	24.2887	21.3047	222.685	252.635	209.724	324.487	187.331	186.971	694.107	668.388	670.039	400.752	294.957	739.437	270.275	314.934	584.665	379.525	233.169	301.99	135.389	76.9767	26.5504	387.82	489.239	972.903
evm.TU.chr1.1338	354.509	374.736	456.102	405.35	343.214	370.032	186.478	304.969	248.321	197.671	204.378	192.72	196.799	238.887	176.166	188.927	151.788	186.868	399.139	477.464	484.828	189.475	169.294	164.659	204.651	417.512	323.994	270.805	255.322	261.234
evm.TU.chr15.325	23.9325	25.2276	26.0452	22.0841	24.7262	22.7422	37.5284	58.5422	50.1029	39.9695	36.421	70.5355	552.467	226.243	199.593	244.8	714.342	258.16	409.831	95.4408	180.586	556.928	181.289	265.233	387.097	162.279	263.713	230.962	291.184	304.088
evm.TU.chr1.2735	1.35744	0.756897	0.585399	0.898993	1.1736	0.788463	29.7163	98.4857	89.3315	36.6215	47.4927	28.0877	235.853	212.175	206.874	206.74	242.285	139.161	120.545	81.2525	113.744	243.68	171.632	291.842	318.754	90.8879	469.015	226.36	140.084	273.676
evm.TU.chr2.713	61.7448	59.8003	53.9027	70.4007	69.9302	67.1626	80.3125	79.2427	70.8341	73.6169	91.9006	69.6489	77.2509	84.1146	95.325	95.7902	71.7953	87.0919	71.0261	74.7514	74.2941	73.6901	76.8342	72.1657	98.7705	71.4514	92.0015	84.4025	78.5677	81.6002
evm.TU.chr5.663	237.526	235.118	231.593	167.536	164.741	178.534	102.904	111.021	103.229	90.3187	89.5113	96.7739	111.281	101.993	100.683	115.567	105.641	119.63	129.59	175.678	140.522	102.6	93.5419	104.034	90.6478	142.881	102.03	101.086	105.52	110.605
evm.TU.chr29.236	3.08868	4.90422	2.85204	0.248192	0.83316	0.335845	261.599	448.518	391.048	13.7292	19.2502	6.29526	0.753502	0.162909	0	0	0.0340746	0.0750817	0.946057	8.48513	0	0	0	0.0691926	0	1472.61	680.778	291.357	584.88	262.005
evm.TU.chr11.39	72.7955	70.4335	75.5286	54.1805	57.512	57.8041	41.0744	39.1622	32.3344	28.4426	31.1717	33.2583	28.5942	28.4506	31.3571	28.8035	25.5456	29.9629	39.8904	47.5825	30.1913	26.6741	28.4119	27.7059	32.2612	101.398	60.7679	52.809	64.9667	46.6455
evm.TU.chr6.551	111.555	104.143	94.5588	88.0118	86.1057	89.5096	78.0147	82.4655	102.698	62.6172	62.5408	66.547	80.3936	84.2038	96.0332	88.1687	73.5368	89.9767	79.3255	98.9067	90.9668	71.6935	67.9454	77.4664	93.8545	107.539	94.1961	78.2821	83.4935	69.189
evm.TU.chr2.1321	14.4061	16.9447	21.6886	15.8407	16.5656	21.7797	248.705	466.793	183.015	504.825	544.483	626.152	153.996	149.902	83.0356	132.84	255.237	219.108	84.3181	83.085	32.0992	139.41	336.609	228.889	1.09057	1136.25	669.765	839.897	1449.22	844.012
evm.TU.chr22.143	23.1911	23.5957	21.8704	29.3222	27.6445	29.4957	92.5482	71.6891	77.5526	97.244	76.8318	84.2854	43.9136	44.1399	39.0263	49.1713	44.2728	42.9156	49.2127	41.5313	44.019	60.1916	43.9043	56.4468	34.6944	14.2623	23.4101	39.7778	32.891	33.9533
evm.TU.chr4.506	24.5445	25.3765	25.4145	24.0459	25.5433	23.2906	31.1397	30.7863	30.487	25.6594	21.622	26.7313	25.5791	21.4241	20.8622	17.0149	16.4589	17.7317	32.9573	31.5906	34.9171	24.1208	20.313	21.7164	31.9853	33.0791	36.1127	29.5485	23.5791	26.5471
evm.TU.chr9.162	102.946	106.506	117.411	140.948	136.739	138.458	149.97	156.499	182.208	188.727	134.567	128.036	152.853	161.708	142.367	156.817	158.194	175.523	171.728	131.761	229.369	155.757	147.836	120.108	106.117	61.4972	109.569	132.978	111.143	121.89
evm.TU.chr2.145	96.2798	95.9877	81.7756	95.0162	102.556	104.185	76.5992	83.3982	76.7415	69.3333	80.3818	66.306	126.125	114.86	115.968	102.227	121.238	109.231	107.182	106.423	84.7774	88.3645	100.292	111.168	124.162	93.7998	114.959	107.43	97.4064	98.6755
evm.TU.chr24.31	146.426	149.695	144.385	140.116	145.278	149.734	136.162	124.189	117.685	115.105	96.9499	114.879	90.568	89.8174	79.8829	84.648	90.6261	84.1858	170.616	155.455	146.722	116.621	91.2927	113.817	99.2489	97.7449	101.469	126.647	93.2129	108.941
evm.TU.chr8.572	50.7925	61.5975	44.7274	44.3795	48.947	41.4025	158.687	131.996	129.743	203.259	177.305	180.708	85.0096	85.5036	84.1833	126.818	145.98	98.4072	95.2871	98.8266	104.974	133.778	204.792	124.206	68.1294	35.079	48.3183	65.029	75.1119	75.1185
evm.TU.chr27.55	187.04	152.68	181.803	144.889	128.542	124.63	243.356	450.453	574.647	105.552	102.806	95.787	231.266	361.569	154.379	99.6716	87.9835	105.061	362.113	389.229	528.785	116.846	99.3644	105.743	638.496	217.154	1062.82	213.767	133.486	168.353
evm.TU.chr5.1168	135.198	113.066	133.371	116.439	108.586	115.516	62.4873	63.8523	59.3063	56.7159	53.7011	66.0255	51.5193	50.8027	51.4152	52.6518	53.2631	50.5404	84.7416	94.5114	81.7197	60.1017	53.3184	60.1538	37.713	86.125	53.838	61.4865	49.2124	56.3732
evm.TU.chr21.324	244.698	223.794	212.197	202.277	206.755	215.762	137.39	157.087	127.265	104.185	168.266	122.554	148.36	173.833	153.548	151.454	155.684	139.467	170.647	220.576	216.865	104.988	114.894	125.542	134.937	128.803	156.636	132.058	117.419	120.188
evm.TU.chr15.198	100.821	97.8419	99.9495	98.802	97.4586	100.029	34.4502	41.0144	35.1246	28.5916	29.5915	27.5343	39.0054	40.7227	32.6991	32.9719	31.9908	37.5864	61.8359	72.8036	44.1064	44.0662	30.9848	46.1029	43.3453	66.448	51.042	54.0491	51.4121	68.5401
evm.TU.chr1.2406	31.2683	35.8455	32.7708	36.4193	34.5801	42.1129	30.6227	28.9395	32.3545	32.1568	27.8797	29.8172	43.9517	43.0588	45.2592	54.7601	37.8219	48.7094	35.5409	34.3964	42.4248	42.9878	56.248	41.0656	23.3662	14.3259	22.6142	40.9984	39.7298	40.0717
evm.TU.chr1.9	49.4653	46.8582	43.1704	46.5417	45.8668	47.2912	86.7492	83.3686	89.5127	87.0046	70.5611	68.0957	106.967	104.766	108.558	102.206	92.7141	121.171	100.577	93.6226	137.707	107.837	90.2525	85.5048	73.7053	37.6224	53.6899	58.3238	66.0196	66.2823
evm.TU.chr1.2407	36.7627	38.2076	30.4571	31.0731	26.8731	28.8118	36.5972	36.6673	31.87	30.6666	30.9064	38.474	29.6273	35.2599	30.9146	33.5609	34.3469	33.6719	31.8742	33.0005	33.2063	36.9411	34.8054	40.8569	32.8919	44.5191	32.2482	39.6578	46.8847	38.7673
evm.TU.chr18.396	67.3619	61.2934	62.5685	43.7051	58.8711	56.2807	41.0501	43.4784	40.1579	27.6529	34.5824	31.2495	29.8519	20.3421	30.0056	39.3018	28.9928	26.8618	54.2786	70.9152	43.6856	50.4008	48.6296	50.5162	84.0415	44.3081	61.1681	53.4478	71.167	43.8116
evm.TU.chr19.4	32.0759	29.1341	27.5733	27.2334	28.7259	25.1774	21.8462	22.7448	22.913	10.3091	13.0916	12.4255	11.9743	10.9605	10.3088	8.18744	7.4386	9.84563	19.8339	26.897	19.7177	9.48766	9.09098	9.24814	32.6211	31.7491	41.6405	18.6787	17.7007	16.2437
evm.TU.chr29.138	42.7579	40.3899	47.8809	46.5363	51.3716	51.23	59.527	56.6667	68.4279	58.4292	58.6317	69.5663	47.6173	48.2282	48.3165	50.8457	57.7121	52.0555	43.9962	43.5166	43.3909	58.256	53.1963	56.7738	44.1671	20.6427	33.7038	34.1942	30.8299	35.1204
evm.TU.chr29.230	64.834	158.063	94.3931	0	0	0.145055	373.996	581.053	267.399	0.0771214	0.543366	0.189697	32.1458	117.596	44.0952	0.213868	1.32454	0.729642	143.055	132.894	41.3308	0.341945	0.176203	0.605171	1.41223	103.865	12.8149	184.636	124.589	539.437
evm.TU.chr2.827	104.282	94.9428	97.8905	88.8823	71.9856	72.4417	69.6194	53.5279	38.3467	54.5721	66.836	87.7261	50.5858	45.268	50.9108	45.0765	45.5661	39.6542	68.3186	73.4664	51.1036	55.0419	60.4724	54.8863	39.1822	81.7843	49.1374	59.177	85.6009	59.2429
evm.TU.chr1.2000	30.8041	40.8955	37.4387	28.3681	29.554	36.5006	46.7688	41.582	34.7627	40.823	29.9764	34.7422	51.4327	31.1516	45.6233	28.2021	30.8133	31.5514	28.5657	21.153	17.3883	32.7558	42.1974	21.9461	31.4075	17.8351	25.5004	38.3289	26.9764	50.8336
evm.TU.chr5.338	162.32	155.431	164.859	124.719	122.953	133.634	74.8773	64.5954	69.0445	60.9442	58.9464	69.6917	46.7531	40.6497	49.1331	58.2902	57.1229	48.2007	74.6922	89.4572	63.0832	59.9891	58.0357	61.0986	49.8195	100.317	68.0281	66.5442	63.1837	51.5092
evm.TU.chr1.419	19.4716	18.7154	23.5347	23.2629	20.1356	20.1934	16.9659	19.7032	16.7819	19.3201	19.2265	18.5083	14.7825	17.5167	14.8406	19.3473	15.626	17.5858	24.2314	22.7771	25.7153	16.7012	15.4163	17.6346	15.7324	22.4083	19.427	21.743	19.9872	20.9219
evm.TU.chr25.95	63.247	62.8856	69.0915	65.1633	63.62	65.7568	41.4332	49.6906	46.4258	41.4204	45.7266	42.5692	49.7252	56.4301	54.1283	57.5346	55.4698	55.6803	48.8451	51.1691	51.3841	43.3442	42.9221	40.2298	39.3495	49.3809	45.6586	53.7395	41.4632	43.3265
evm.TU.chr6.285	35.0899	35.2232	33.6736	35.1903	35.0891	37.0949	66.1248	59.0186	60.6755	74.9114	85.5956	61.9128	91.0328	88.8138	111.334	119.975	101.28	147.019	57.4147	47.1392	73.1938	81.4566	96.6051	66.0368	47.3599	28.0858	42.2248	59.6052	78.0464	62.2585
evm.TU.chr19.25	355.088	372.061	387.573	417.757	400.716	390.197	302.285	389.266	394.983	348.748	332.007	334.02	339.235	336.837	303.207	313.989	318.728	305.717	452.59	350.5	295.487	370.202	318.793	357.756	421.378	359.374	368.554	405.035	306.448	424.176
evm.TU.chr5.476	5.34672	8.79798	4.92742	9.711	38.526	6.43756	60.5609	135.169	119.342	69.1588	53.1303	234.337	312.779	159.296	101.377	193.156	1674.54	173.659	821.626	33.3315	152.33	847.515	161.074	360.316	359.59	251.164	395.741	88.6356	276.914	336.573
evm.TU.chr30.33	38.3364	33.6602	33.2079	30.6587	31.5818	35.8523	55.868	61.2352	71.2655	54.9047	40.9969	41.704	69.5887	49.9213	70.0632	65.4389	59.5391	69.0301	76.8211	68.3743	76.5979	86.8941	60.9921	72.983	69.9861	24.3799	33.7332	57.2029	52.7524	53.4055
evm.TU.chr19.403	75.4306	72.0103	69.1029	90.9552	118.52	111.505	40.4741	36.4207	31.3153	36.5497	33.9784	34.346	25.1983	18.2324	16.8726	19.6602	25.4146	19.5173	33.6377	31.709	17.1192	32.1208	21.0192	31.6225	42.2739	26.1157	16.9066	36.1698	24.3872	27.1048
evm.TU.chr10.574	31.2158	32.7274	34.6107	36.583	34.3669	35.7005	27.087	27.483	25.9283	26.7142	21.8517	25.1867	24.0942	24.6015	23.6396	22.0885	20.5048	22.0927	38.0072	37.3233	34.1915	33.1334	24.7707	30.2754	25.0846	28.8874	26.7102	32.6126	28.0153	29.7683
evm.TU.chr1.2333	0.186193	0.578424	0.276313	0.641214	0.680129	1.09664	15.5221	37.9262	39.4948	59.5008	71.9864	30.6316	222.487	249.909	191.235	188.137	172.005	147.014	123.956	137.932	178.822	339.092	372.583	328.683	238.459	44.2762	137.719	69.145	145.037	142.535
evm.TU.chr11.162	90.7398	74.593	82.9395	60.6265	68.391	62.9846	61.3217	73.1445	49.2507	48.5669	65.6713	50.2343	59.8844	58.3565	62.0767	75.1192	54.0332	96.196	54.8816	55.087	57.736	62.4736	62.109	61.9273	60.4162	103.93	74.9887	90.5585	105.637	112.928
evm.TU.chr26.219	36.0046	36.0698	33.612	39.3065	37.0909	39.339	56.2961	71.9477	60.7312	59.5594	64.1901	57.9696	101.209	79.1464	82.0518	92.8651	89.4752	88.2157	54.7432	53.4934	44.5621	65.1385	63.3848	75.6516	107.884	51.4429	81.639	92.3545	61.1851	118.533
evm.TU.chr22.306	21.3468	16.5359	19.536	22.2109	23.9213	24.644	25.7586	27.491	28.7838	31.8588	31.4896	28.363	28.2972	25.4335	29.1651	32.5339	37.4885	26.7933	27.6111	27.6746	32.2682	28.1169	30.0609	32.0456	39.2641	20.7705	21.6966	21.1586	28.3451	25.9179
evm.TU.chr30.149	57.2706	55.0094	52.7558	52.1432	49.6912	50.8944	49.7878	44.6519	43.5721	42.7256	40.6382	37.6515	55.2502	55.6114	54.6759	50.2469	46.0491	49.7137	52.5114	53.3184	50.4404	51.2427	47.1668	52.7453	53.3841	43.324	55.3705	53.9268	51.34	47.3249
evm.TU.chr1.515_evm.TU.chr1.517	71.726	75.163	95.7893	94.0744	92.4273	104.203	98.6833	103.271	112.538	136.588	126.998	148.897	63.7928	56.567	55.9274	86.0313	75.4313	69.6873	63.5423	54.7197	59.8714	83.3726	100.095	87.6998	55.8211	43.7849	41.5255	41.6784	61.295	41.2746
evm.TU.chr3.950	145.24	145.719	163.536	140.611	134.444	147.476	131.113	180.592	60.132	139.88	235.129	191.338	57.318	32.3591	34.8176	34.1078	52.2817	49.5596	73.4941	105.3	29.6406	39.5592	95.9809	63.5774	0.174893	336.554	135.003	197.011	274.243	204.659
evm.TU.chr1.851	25.4366	30.5281	31.0437	34.3497	32.1789	32.0283	21.7113	20.6595	17.4036	20.8231	28.7733	27.6428	21.4654	19.4726	21.9008	29.7175	25.2682	31.0222	20.5812	18.977	15.1072	25.544	22.6229	23.6675	16.6995	30.4127	18.4931	22.8082	19.1103	25.1984
evm.TU.chr6.96	24.807	28.7949	33.425	29.1249	33.5279	28.3695	34.3392	34.6472	26.8454	35.6216	33.78	31.9296	38.6223	30.2681	32.3328	30.8971	30.0481	27.1978	32.2879	27.1683	18.1769	42.9595	42.6864	45.9868	43.0635	34.9804	36.577	65.5517	51.7528	55.3909
evm.TU.chr3.1466	153.981	146.403	139.479	111.248	110.374	117.117	68.6462	60.2356	54.6124	35.2346	37.0113	38.2418	35.6937	41.7124	22.6216	16.4707	13.6811	18.3451	58.043	83.9044	57.9915	19.441	24.6056	21.4907	63.5224	104.899	62.2305	82.2504	87.9601	81.8443
evm.TU.chr5.1279	35.4859	33.8125	35.9711	30.8249	35.5689	30.3367	40.0411	37.601	27.5911	36.3642	27.5662	29.6943	33.3969	43.1482	38.2415	38.3485	30.2427	36.3463	43.8867	39.0858	52.8877	29.5643	33.8819	31.7341	32.5421	36.914	32.8577	31.3321	30.6207	32.4134
evm.TU.chr10.59	111.704	121.653	113.903	136.748	116.622	118.871	131.212	135.756	133.96	133.19	114.639	122.648	95.3213	115.488	85.013	103.261	106.634	94.8061	175.071	162.714	186.446	147.883	128.8	133.95	114.242	111.772	127.553	134.202	112.189	126.483
evm.TU.chr2.737	61.4018	56.4836	64.3146	51.87	47.8962	50.2136	53.1242	65.3611	57.9914	58.4426	50.7103	43.7992	57.9599	51.5718	57.6575	86.247	70.2618	62.4164	61.5629	43.062	62.6079	67.7294	55.2092	69.3979	81.363	47.2321	59.901	66.5159	57.8451	74.5719
evm.TU.chrZ.18	76.4727	74.7747	68.6838	61.2095	62.4213	64.3767	56.333	62.1982	85.7877	77.6268	56.0269	77.6733	96.5522	96.2247	99.9436	66.6864	70.4291	65.736	64.6389	81.5745	71.5156	84.2975	96.2241	63.266	96.0267	90.6638	69.9467	61.0278	109.809	68.2284
evm.TU.chr20.39	34.4167	33.2551	33.7244	35.5779	36.7499	39.3139	96.9542	96.2215	107.82	153.445	96.3028	98.2552	146.595	157.863	148.761	147.487	140.874	125.93	61.7393	70.6403	72.7685	80.8859	89.6861	82.2162	94.0465	40.6402	53.4179	68.3366	53.1568	57.3229
evm.TU.chr15.413	74.9659	72.6615	70.8085	65.9071	66.5171	68.2411	52.7047	64.8162	48.0344	45.3008	52.0813	52.3654	70.4038	66.756	68.3065	69.7192	65.8787	66.132	62.4043	71.5844	50.0509	52.6761	51.728	53.6875	61.3465	110.508	77.3326	73.901	82.0409	81.4964
evm.TU.chr1.2297	130.141	125.009	109.862	103.884	96.5121	112.972	50.035	46.136	41.8473	43.1183	36.7895	40.5668	39.417	32.8642	34.5421	41.7937	38.2427	36.8842	81.9551	93.7497	63.4862	51.1375	42.1649	49.9338	30.0443	78.7226	47.9807	47.0502	48.925	37.9262
evm.TU.chr24.201	32.1718	32.648	32.6363	31.8516	32.3476	31.6328	25.3789	27.7086	25.0373	20.2343	21.1047	21.9412	31.8873	35.1809	27.0477	21.143	21.3373	23.5079	26.3713	35.2612	31.5938	21.5845	19.5919	22.7	53.0982	24.6035	43.3223	30.4107	28.6499	37.7564
evm.TU.Contig920_pilon.9	187.895	186.225	194.428	171.557	174.624	169.71	80.0309	80.5455	75.8979	78.9368	73.9704	77.3478	74.7041	72.436	63.5036	71.1506	77.6912	77.2118	112.676	123.714	90.371	82.0843	71.8458	86.8307	65.1161	128.407	77.9557	88.159	72.0953	79.4712
evm.TU.chr3.1681	28.5181	29.3898	27.3071	28.9695	30.5016	31.8679	82.3996	84.6499	95.9179	86.0411	66.9279	76.2548	56.4615	42.4549	56.9888	57.1578	54.3096	56.4203	57.8591	58.4513	101.096	62.5823	41.3089	47.1936	47.4397	12.8119	23.6582	45.079	36.1686	45.5567
evm.TU.chr5.930	384.773	408.865	435.363	339.371	307.441	385.789	404.65	302.352	333.627	259.219	321.872	299.79	137.039	148.805	134.873	120.945	92.8662	143.664	97.5724	96.2109	96.4112	107.425	155.006	107.031	138.222	145.855	168.673	117.716	93.3163	130.504
evm.TU.chr26.177	74.8313	72.0421	71.8538	61.0315	62.342	64.2811	25.271	25.7193	21.756	23.2515	20.8469	21.1003	22.6941	21.2109	22.195	23.8312	22.3396	24.9293	32.0754	42.3362	26.4882	19.9972	20.6554	23.1511	17.8863	38.3441	24.3833	28.3077	24.9201	25.1124
evm.TU.chr5.467	11.6451	14.0568	12.543	15.4214	14.4715	13.6148	58.1714	45.6078	47.2149	45.0637	32.1043	45.2142	17.832	12.6147	10.2009	7.58424	8.16447	10.4838	27.4181	29.3421	28.8917	20.8405	10.7106	15.9919	31.5101	24.5448	15.8278	24.3474	32.3391	30.3405
evm.TU.chr2.1132	464.668	469.981	588.927	666.761	525.13	551.06	333.785	411.964	384.221	372.523	330.719	353.044	382.422	475.525	416.649	447.354	337.788	391.048	704.966	610.487	819.842	477.864	353.683	382.643	311.727	513.252	458.117	478.662	514.851	511.708
evm.TU.chrZ.323	37.0784	44.1946	33.7442	36.3071	35.5341	35.4296	23.4978	24.9137	20.0077	25.1105	24.354	26.248	21.4744	24.3514	34.1648	24.4121	20.7991	30.9704	21.4856	26.4906	15.0682	25.1181	26.8904	21.8655	14.0245	53.548	21.392	34.1533	39.8364	24.688
evm.TU.chr18.142	79.0041	63.7554	63.4172	101.685	103.646	89.5494	82.8835	96.6903	116.674	88.9477	73.1441	75.7864	144.187	139.377	161.377	75.4231	58.8735	103.411	145.392	154.636	155.745	129.534	97.5104	99.1285	185.123	51.5235	148.413	128.858	126.746	116.557
evm.TU.chr1.1171	41.1909	48.012	41.7458	25.7326	22.4847	25.0798	48.7606	63.0215	52.9149	66.0175	67.7141	43.6318	269.984	309.552	309.612	245.353	173.11	316.324	125.69	99.0772	213.151	169.361	150.889	117.694	17.7724	239.605	130.529	236.167	323.194	315.837
evm.TU.chrZ.143_evm.TU.chrZ.142	11.2797	12.9853	12.8044	19.3924	17.947	18.0072	35.3008	28.2355	38.0973	35.3952	17.2273	23.4557	32.7984	30.5868	34.9206	29.4996	29.0123	25.2231	30.789	25.7231	26.7139	40.0679	45.4141	37.9619	28.953	12.001	17.4269	21.2768	17.8718	12.849
evm.TU.chr1.1289	83.4379	81.1666	87.9248	81.2967	74.9732	85.0941	36.3535	49.5972	37.6987	35.2425	40.0082	35.396	43.2946	49.5096	42.7131	51.7685	49.7431	46.2285	61.0583	72.8581	51.8188	39.9062	42.399	42.6314	33.5507	89.3019	54.6679	56.2344	49.8553	49.7384
evm.TU.chr14.493	32.6413	26.9557	33.0382	32.0264	32.626	38.0222	46.6753	40.0679	33.6433	42.7777	54.0195	42.1176	63.2161	71.8648	67.5243	56.5715	52.5545	75.0176	55.3347	61.6397	29.2986	82.8842	97.1186	58.9124	5.43948	15.8742	6.73114	34.0716	30.6107	27.0509
evm.TU.chrZ.996	49.763	47.462	40.6519	49.9189	47.3203	42.4426	36.2639	33.584	47.6911	44.3691	49.1425	38.5267	128.268	122.244	149.269	94.2763	107.426	115.755	62.6131	64.3659	65.1514	105.753	111.604	46.9372	71.5517	77.4159	57.6488	104.151	124.509	95.385
evm.TU.chr20.295	28.6672	20.9585	15.4524	33.4964	31.4796	36.5804	20.9867	100.368	12.486	29.032	19.1967	16.593	33.9059	21.479	23.7063	14.9736	13.4796	21.8906	13.8338	15.8496	24.8661	21.9266	18.2541	18.743	114.208	20.1182	31.9947	102.247	44.528	107.731
evm.TU.chr22.340	236.174	240.428	238.4	252.004	261.218	263.053	211.324	188.193	183.265	183.739	160.334	187.943	189.929	180.372	204.599	183.484	188.305	183.243	240.269	221.833	186.314	218.005	207.04	215.241	207.01	169.037	163.815	191.408	193.794	183.441
evm.TU.chr25.339	406	368.817	420.615	368.101	345.485	352.977	238.294	294.297	251.754	205.234	186.417	218.549	291.946	299.366	256.36	242.069	224.801	261.438	418.07	489.214	467.002	252.196	231.065	246.508	272.667	372.282	370.673	316.007	325.061	287.214
evm.TU.chr1.696	59.4171	58.3922	55.7995	59.8925	65.3622	57.2714	42.9874	41.9053	35.0221	47.3133	27.9833	40.5658	10.4713	14.1062	14.2294	21.7427	18.4672	23.1595	37.5052	28.6966	32.4637	40.5375	26.1239	43.6386	14.353	9.2611	10.8675	15.6366	19.5279	15.0309
evm.TU.chr8.331	32.3683	31.1016	30.2316	32.6186	33.9552	32.7879	35.2041	35.9695	34.172	31.7143	28.0899	27.6687	45.9687	50.1208	53.3889	46.4205	41.0727	43.7551	41.2918	39.3159	41.0576	41.5514	40.8184	42.0692	49.0312	27.1945	34.9442	36.7578	36.9346	34.6828
evm.TU.chr8.275	98.1404	98.657	115.134	88.4895	103.773	104.384	21.4957	12.4465	6.54318	12.3201	21.4881	22.1379	3.98121	2.28483	4.3594	4.28395	5.87488	4.85665	16.8099	24.6417	4.63034	5.20728	8.99911	6.70103	1.82176	59.9208	17.4577	22.8524	22.4277	18.5848
evm.TU.chr5.1088	67.4635	62.6213	84.0344	71.1565	74.1099	70.01	102.585	88.5689	96.1992	48.4372	63.7385	49.3055	59.6831	66.7114	48.5589	37.714	38.7306	33.6608	39.4018	37.9196	40.499	35.9225	38.9137	36.6262	122.344	38.8566	99.3178	34.3068	52.218	38.6785
evm.TU.chr9.157	20.6033	18.0894	17.0106	24.3352	24.1665	21.6422	59.6905	62.8867	58.5569	87.1421	75.5504	71.9189	70.5986	63.897	119.434	77.0257	80.5957	130.719	44.821	38.3175	28.4612	78.3087	102.878	56.6525	26.8093	14.2717	5.44719	19.8345	42.9496	28.8377
evm.TU.chr1.1995	45.4314	45.9547	43.703	45.4213	45.9296	40.5395	42.9046	43.7349	36.9405	31.7776	29.4539	26.8246	48.2352	48.2191	57.5967	43.1937	41.5574	41.0129	55.3974	51.4931	51.6354	44.4585	39.3126	45.5348	63.8515	30.0282	48.5079	52.3328	51.2456	49.8196
evm.TU.chr25.399	64.716	64.5423	62.9051	64.6725	64.9243	69.3856	190.987	173.94	191.246	259.441	200.096	224.834	109.523	81.7483	79.343	129.301	132.041	106.734	144.224	107.92	155.095	207.656	164.382	194.821	87.0809	38.9287	81.9061	105.251	81.4452	91.5046
evm.TU.chr1.1572	8.63938	17.8926	10.8117	21.3429	17.9076	13.1445	247.462	121.407	203.263	265.317	178.947	181.105	102.157	113.366	92.4087	80.277	101.089	76.6974	122.102	82.0246	115.673	153.471	186.318	144.992	126.266	17.129	99.695	78.0779	102.654	59.882
evm.TU.chr3.858_evm.TU.chr3.857	22.3139	26.1947	25.0826	22.9687	23.55	24.3109	42.144	27.2144	28.6336	40.7738	37.3853	38.3218	24.744	29.0611	28.6798	38.1372	38.6565	40.0775	24.9407	21.551	18.4788	34.5311	34.9498	32.9336	25.4067	19.0269	19.0062	25.2258	30.2547	30.7293
evm.TU.chr19.291	53.3375	47.6502	41.1786	52.225	51.3246	47.7601	25.744	26.5046	22.4534	24.0065	30.2835	24.6608	23.1899	25.6357	24.0338	25.2221	19.9668	28.5127	35.4035	41.7846	40.0248	25.923	23.0996	25.0288	28.5476	30.7219	28.4011	25.8498	26.1569	28.0885
evm.TU.chr11.400	104.175	107.023	124.047	84.4723	102.508	101.885	128.819	127.382	128.85	106.284	96.4204	111.3	130.173	148.768	124.827	113.972	128.008	152.93	99.7814	101.313	105.561	124.388	119.687	119.064	117.787	102.507	107.668	88.8727	119.811	108.352
evm.TU.chr21.123	54.9307	67.7992	60.8065	72.2828	67.298	67.1672	39.8837	31.1704	34.8265	41.423	41.7989	40.9988	27.9821	25.2608	25.9869	37.8514	33.1812	38.3039	37.0514	46.7106	39.6697	40.2772	37.8112	30.7448	21.5759	39.9287	21.7943	28.5311	40.7128	31.3401
evm.TU.chr8.55	25.782	24.5703	24.3102	25.6272	27.2103	28.4931	35.3951	28.026	30.0015	39.2013	32.9834	40.4012	39.5012	31.9333	37.4958	46.4548	41.6201	40.1115	33.2554	28.0816	29.2087	41.6064	28.0565	51.387	32.2705	20.9614	25.0109	38.1496	29.5578	37.0111
evm.TU.chrZ.216	42.538	43.4687	40.051	41.4873	42.3528	45.2673	31.2233	27.1541	25.2773	24.3373	22.1081	21.1526	32.6003	29.515	35.4488	33.9705	28.2388	35.0191	40.1585	38.8299	39.4936	31.0295	30.5366	34.3869	22.629	34.9348	25.7132	34.2166	31.4576	37.9362
evm.TU.chr20.136	324.36	314.4	298.44	284.422	299.32	298.845	157.262	139.135	154.27	149.069	132.946	143.084	153.183	145.548	137.255	158.781	153.532	155.873	199.92	232.786	189.17	147.563	141.124	155.318	131.393	188.564	130.338	155.337	147.255	149.087
evm.TU.chr6.34	131.043	128.244	129.301	145.795	139.603	152.308	58.4241	71.059	63.023	58.6376	62.8919	66.2789	62.8479	62.2842	65.0906	73.4132	83.6105	64.1118	114.737	157.012	111.449	75.1582	49.9829	70.1505	80.521	85.8965	66.6728	68.3539	72.5708	80.6778
evm.TU.chr25.333	57.2147	58.482	57.2142	56.9741	54.5373	51.6759	83.5869	96.3399	91.184	86.8445	92.6958	78.5265	120.882	125.858	118.294	135.87	126.503	145.772	118.221	96.1555	133.942	125.686	121.443	123.525	114.21	88.7052	114.492	114.899	118.875	116.202
evm.TU.chr26.45	81.6087	80.2074	73.495	64.2302	75.1053	73.0253	43.0595	47.2063	43.541	34.0847	31.007	31.9583	43.6996	39.8504	36.6297	34.3741	35.5903	34.8776	56.9665	67.9613	53.9064	36.6095	30.4744	40.3666	48.0128	46.5885	47.2391	51.1364	35.2354	48.547
evm.TU.chr29.71	147.728	145.719	144.65	167.313	153.659	151.502	86.1191	102.849	98.3375	84.6907	105.933	101.703	84.0126	95.3257	86.7001	92.7073	87.6955	96.2702	105.355	124.378	110.263	76.7236	85.4243	79.8734	95.5046	113.973	93.8455	90.6354	89.0281	93.4344
evm.TU.chr27.209	222.8	218.212	218.472	256.871	266.609	273.856	199.501	213.546	160.452	171.063	157.375	161.882	207.229	168.821	150.955	152.04	126.479	151.39	265.646	287.627	297.806	163.372	127.381	139.26	227.344	157.195	174.056	254.612	193.703	288.606
evm.TU.chr15.409	191.422	201.835	206.205	189.219	192.472	193.935	160.629	150.372	147.344	137.274	137.787	144.31	157.09	137.215	131.474	129.301	131.668	119.526	160.226	146.235	111.847	155.113	134.099	136.285	133.352	142.718	110.099	156.009	144.207	160.744
evm.TU.chr9.247	16.486	15.3282	16.0939	18.7366	19.629	20.4327	21.6973	21.5217	26.6076	24.1707	18.2638	23.0074	36.1646	30.0186	28.3753	31.7616	27.8601	30.8669	19.1671	21.147	18.8691	27.001	26.7777	23.0885	34.7803	28.3634	26.5103	15.7228	21.6117	19.7482
evm.TU.chrZ.842	68.4619	69.3969	74.6021	72.477	68.3702	70.8545	70.5817	66.4949	84.4038	73.9298	61.2787	80.6918	70.6791	77.0899	70.9053	48.8239	50.8161	43.0657	54.7321	51.1216	49.6052	59.3647	67.5553	42.1683	97.0257	73.963	91.0517	55.7382	92.6904	50.3991
evm.TU.chrZ.655	120.466	123.401	120.985	107.733	101.268	103.602	79.7897	66.0477	34.7998	73.5847	82.2575	78.4584	63.1987	59.2861	71.9665	119.785	101.707	100.652	66.7013	86.7688	47.689	87.7821	87.8296	87.4455	48.1512	173.472	99.5414	129.716	154.958	112.938
evm.TU.chr10.107	40.3397	39.4562	39.1838	48.4902	52.244	51.3584	46.8358	56.7844	55.8008	62.9058	52.1381	53.9944	67.6194	62.5418	57.7562	57.3676	54.8341	53.2338	60.0092	49.3866	68.9463	56.1041	51.5128	49.9003	99.3833	34.8905	82.4761	44.1112	43.4878	50.4288
evm.TU.chr1.1379	177.455	163.679	169.717	148.545	142.517	138.191	83.8335	87.2751	80.5631	68.051	64.4106	72.4137	91.7077	82.8653	94.1001	82.3497	75.0384	82.0912	126.093	162.517	152.22	82.7484	66.8342	81.6569	94.7316	105.151	89.0531	90.7498	105.475	102.919
evm.TU.chr4.335	110.484	111.872	106.027	106.784	104.572	110.536	59.2442	56.903	49.2262	52.532	50.6613	52.9378	66.5554	63.0496	67.6059	65.4375	62.3013	68.639	74.5752	85.7367	61.2356	68.4598	53.9572	68.5416	59.8628	83.0132	60.4469	73.1675	71.4196	78.4804
evm.TU.chr6.336	50.0306	50.9483	46.1828	49.8254	48.5965	50.814	47.3365	46.6353	33.0586	41.5206	54.1975	51.4334	53.4997	47.0647	43.5598	39.9387	36.4649	45.7688	45.3053	45.9179	28.0311	37.1866	40.9707	36.0394	57.1823	77.108	47.0739	54.6661	79.2269	68.3767
evm.TU.chr1.2468	17.0935	15.7628	16.0387	16.3587	17.6124	16.3268	17.3732	17.0268	16.8298	16.8774	17.5714	17.2562	23.2401	23.8196	31.418	29.8355	25.8719	36.4973	20.5628	18.9038	24.811	26.1589	25.002	21.8228	20.0013	18.573	17.8137	22.8773	28.8203	24.7154
evm.TU.chr3.1130	17.4145	17.1764	17.0066	16.4704	15.9195	16.52	20.7293	18.9707	18.7475	19.3378	23.2277	21.4952	43.6455	54.1248	68.2233	58.3111	63.306	82.0266	28.8037	29.656	29.1292	42.3075	33.6704	28.3323	51.3877	28.015	44.0339	25.3313	32.1131	32.1039
evm.TU.chr13.377	150.672	146.776	153.599	111.796	109.728	117.977	65.7412	71.5905	65.3061	53.5883	58.6617	52.7798	74.6502	74.5611	73.7727	64.9027	69.6034	72.1373	91.6084	120.015	82.6656	77.0784	58.1857	75.1271	76.7976	88.418	61.6563	71.6204	65.3667	86.7559
evm.TU.chr26.162	131.709	137.485	134.779	98.9315	108.372	120.459	68.1783	75.3218	69.6734	59.0397	60.3401	66.1328	66.8704	69.0839	67.304	70.8123	69.6914	77.0678	96.2009	116.219	103.62	69.203	58.8139	62.3915	63.1733	123.243	90.7194	77.3847	78.6548	78.9726
evm.TU.chr3.1196	34.957	38.2745	38.3579	48.793	47.1939	47.5335	47.1829	42.0583	44.781	38.4931	64.1472	46.2009	37.1247	36.9993	40.5481	32.3279	23.2848	42.8811	24.2176	27.9294	30.8038	27.4114	32.5515	25.5561	29.8237	31.6698	27.5462	27.2035	20.7997	25.7967
evm.TU.chr1.1407	242.688	247.434	268.16	305.896	317.45	312.523	312.354	271.45	269.496	307.557	308.027	327.89	181.466	154.236	229.53	210.742	232.869	209.78	146.734	121.449	126.849	179.5	190.594	178.514	199.49	153.65	134.688	189.648	201.406	176.256
evm.TU.chr15.157	16.4237	16.9936	16.2486	29.2715	33.2377	30.9138	49.2335	51.8325	41.2291	42.2783	39.3554	39.916	81.6735	71.8125	46.1485	48.6153	54.3129	42.242	39.2262	28.7303	22.431	46.5145	59.9362	45.9977	71.4194	17.6577	26.4838	39.5084	32.9218	61.9622
evm.TU.chr1.1701	6.40013	8.00034	8.54809	17.5539	18.5743	14.9124	162.738	172.857	236.553	309.079	232.975	297.078	258.668	201.89	163.869	134.893	289.929	170.067	140.683	89.4811	90.0514	260.255	251.29	229.388	192.561	44.3647	162.863	146.057	166.649	150.859
evm.TU.chr6.344	47.4986	47.2274	54.0922	49.0012	50.3854	50.2835	36.3735	40.4488	36.3649	32.9444	30.8174	30.948	37.7103	40.6672	33.275	35.877	33.1852	36.292	46.5797	46.2193	47.0742	38.2798	31.0498	34.1328	36.7709	42.1051	39.9544	39.1677	43.2698	39.3197
evm.TU.chrZ.389	43.9092	43.1191	45.0877	51.791	57.0458	55.3094	42.9079	28.1332	18.2964	35.5456	49.8283	58.5408	35.3255	32.1151	39.8211	38.6205	39.595	43.7395	23.5051	24.4204	21.3247	27.076	40.824	24.9889	20.5332	26.7247	21.2327	29.7077	37.7689	34.1259
evm.TU.chr1.2170	20.7967	21.3163	19.9049	20.5109	22.2858	21.5103	30.8889	34.0489	28.0673	26.2786	25.5979	27.1645	53.4651	48.339	48.6918	29.7397	30.4302	36.5358	35.0495	32.2328	30.3482	23.7553	25.4186	25.0992	44.4029	32.2576	49.5046	36.8055	25.0935	38.2326
evm.TU.chr21.243	37.2879	36.9978	34.0989	37.9526	38.4738	38.1943	31.2728	34.8217	34.1389	27.9382	28.7922	29.6232	44.1999	45.3917	44.3875	37.2777	36.7605	37.3638	42.5196	39.5227	39.2592	35.1372	31.3846	33.2792	50.2438	38.3896	54.9651	39.5394	39.8952	39.6217
evm.TU.chr7.666	327.019	279.957	281.075	268.993	263.371	272.036	145.773	173.89	151.815	157.02	173.301	130.358	191.449	201.748	195.516	200.173	201.676	198.813	162.502	215.259	189.058	138.311	151.849	190.741	148.006	215.157	193.747	171.187	180.4	138.241
evm.TU.chr4.1079	66.3642	69.6488	62.7302	61.7106	58.5013	62.0912	61.1708	81.9317	66.096	53.4231	58.1119	58.4153	56.0475	61.1118	62.6411	51.8271	53.8473	51.3949	54.7225	65.7339	54.9454	43.6326	49.3331	47.3146	64.3915	91.3695	83.6794	67.1482	72.5943	64.4964
evm.TU.chr1.954	42.7986	41.1615	39.7343	41.7528	43.3174	44.8129	39.9427	33.5766	33.3834	28.4667	31.998	36.0465	40.9541	39.6754	36.6997	32.3948	34.0046	33.3663	34.8286	34.7506	26.1664	39.3806	35.9026	36.5357	47.0985	45.7233	41.8378	44.7684	41.6359	39.6294
evm.TU.chr23.56	325.223	356.098	410.167	330.499	337.663	319.282	275.795	408.459	545.212	179.602	174.278	195.813	200.093	268.817	133.289	110.203	135.174	111.897	363.242	382.339	320.443	117.008	108.384	159.367	516.801	699.568	804.718	343.93	295.263	278.48
evm.TU.chr12.173	38.738	33.1068	36.922	44.2885	44.6608	41.4716	65.5619	69.0115	68.006	77.0502	73.0722	78.7953	55.1972	54.5477	61.5704	91.9571	82.7788	80.5799	50.4154	43.3856	59.3318	66.2312	68.1949	71.7066	92.5653	21.4313	29.707	41.0429	41.6087	48.3041
evm.TU.chr8.382	23.0192	23.6015	23.5559	29.5972	28.6408	28.4224	41.689	35.536	40.9686	32.7891	31.2596	32.1016	30.9047	34.7534	32.5606	42.2095	39.1765	31.3868	29.5594	27.3444	33.209	31.1209	33.4649	33.9095	39.8762	14.5695	24.6681	23.3857	22.8518	21.0613
evm.TU.chr21.165	77.0426	83.7762	75.6968	90.5538	88.5369	93.9695	87.0254	176.166	62.7184	165.438	222.888	192.538	81.9092	67.8526	55.8255	82.2365	95.3623	73.5603	74.0156	73.7269	64.761	67.7394	101.468	79.7696	42.269	81.2084	61.4553	86.4794	134.592	101.301
evm.TU.chr29.52	16.3505	15.3675	14.2901	19.3679	22.0385	18.7988	19.1141	20.4682	17.6406	20.7098	26.4492	21.6075	31.2838	26.4513	35.4314	37.5815	35.5749	38.7712	20.9049	16.9442	14.7984	25.27	27.6494	26.2779	28.2837	15.5498	15.569	22.7431	18.8928	21.6803
evm.TU.chr3.762	84.4989	87.7204	85.9819	92.1815	97.5986	94.6946	45.9152	42.4166	40.9126	44.5892	37.4963	41.5	31.8803	27.4789	32.3847	42.9511	39.8215	34.1913	52.5489	62.0556	43.4735	40.1333	46.2066	42.2285	29.0849	61.6625	34.1665	37.9589	47.3529	34.9077
evm.TU.chr1.1792	181.014	188.394	178.127	172.117	168.09	178.33	151.67	181.434	183.392	163.364	166.997	180.569	128.871	126.766	125.626	159.268	160.184	137.189	121.718	146.04	132.327	126.932	132.509	129.809	103.892	244.451	159.201	138.014	165.71	140.69
evm.TU.chr11.308	43.7653	40.7292	41.4407	50.5029	53.4054	55.2104	58.4288	57.0436	64.5332	61.1484	75.3766	56.2087	73.1433	60.5944	90.1293	93.0333	69.5321	104.616	46.7176	48.2729	60.5348	72.2683	77.5944	60.8365	44.4941	19.8239	20.9787	40.3425	43.0672	50.5798
evm.TU.chr6.477	32.179	33.6928	32.4065	34.8425	32.6646	35.4093	32.104	29.4339	30.2771	30.3631	24.3523	27.5061	26.8011	26.9452	26.037	27.5711	24.9389	26.1347	33.7528	32.5726	28.7196	33.4993	27.0485	33.3797	34.479	24.6869	30.2513	30.7505	26.9812	29.7739
evm.TU.chr24.209	634.695	595.198	833.636	945.73	758.67	795.133	472.137	691.82	617.343	609.106	503.588	587.433	461.974	543.395	452.601	549.187	430.697	484.092	953.935	849.079	1183.32	569.416	413.978	497.692	478.302	784.028	794.492	701.846	544.962	712.405
evm.TU.chr30.42	144.752	136.672	129.751	96.4228	117.073	103.15	59.5885	63.5747	63.7353	48.0043	45.9594	54.5575	64.6733	61.059	65.1184	50.432	55.9124	62.3835	72.1355	102.904	71.6735	58.8074	45.7305	58.1712	61.3832	84.2645	56.9898	58.7811	53.2201	52.9409
evm.TU.chr30.30	250.604	251.291	275.76	197.417	213.656	203.963	79.6313	98.7892	89.484	67.8473	74.9834	82.4083	70.4079	62.2392	59.1888	65.8258	69.883	60.6098	142.789	179.506	121.913	65.8256	61.4379	72.7193	50.875	292.527	135.3	120.92	115.751	117.016
evm.TU.chr4.30	138.109	131.869	129.579	134.583	130.609	126.957	58.7982	79.7218	73.1114	62.3744	74.3718	61.9181	81.092	90.1062	85.0602	89.1475	80.7722	70.9059	111.008	129.403	100.566	58.0386	58.2712	73.8081	64.299	126.153	94.818	97.9882	71.0809	100.749
evm.TU.chr3.1140	52.9345	57.203	56.3921	54.5209	53.4436	54.2737	47.5871	40.4467	42.5867	45.9469	42.7196	39.342	35.2278	34.582	37.7318	34.4281	33.549	38.1745	46.2506	46.8233	51.9993	40.5296	41.1155	34.6215	32.7795	39.1452	39.9093	51.5578	47.5762	53.0159
evm.TU.chr24.189	78.4174	81.4644	81.1517	92.6016	89.832	92.01	66.8485	58.348	56.918	51.2182	58.5319	56.4391	47.3172	59.2012	49.5005	45.2714	45.9896	50.5265	44.8174	38.6338	28.5229	42.2527	41.5978	46.6123	43.0394	58.4154	56.1329	65.4135	45.3972	45.478
evm.TU.chr36.24	35.7334	33.3441	38.668	23.2591	32.1278	40.1571	83.6625	66.5795	104.021	38.8167	35.0542	38.2142	52.4176	30.3458	37.5274	16.3942	25.417	26.619	38.291	37.2215	33.3508	26.9313	24.5638	20.7775	82.4318	20.6242	76.6104	23.7358	19.464	19.7713
evm.TU.chr7.724	73.9397	76.7121	70.6465	90.2072	82.5585	82.524	59.3474	56.8422	63.9339	63.0008	55.1436	53.2105	92.6354	98.7435	97.4017	92.7423	70.7693	92.1514	107.447	104.317	114.543	96.806	83.2119	75.2091	116.708	70.2503	114.363	96.5224	92.8222	103.706
evm.TU.chrZ.60	243.27	165.77	194.478	167.098	137.913	162.157	112.463	90.8653	38.9861	50.8662	71.0473	64.6788	44.4849	28.6929	19.3663	21.3431	17.6759	26.815	119.581	109.799	77.8416	45.1066	59.0315	57.2927	100.696	198.723	99.0367	159.379	162.537	177.595
evm.TU.chr5.135	36.5752	39.1396	39.7013	46.1187	39.2568	45.2844	135.046	166.39	206.946	122.486	133.946	114.011	196.968	259.934	193.645	135.743	137.59	135.287	100.792	90.6401	155.004	88.3107	102.152	83.3766	273.569	90.7479	273.404	100.823	84.7882	102.31
evm.TU.chr14.317	333.244	315.698	340.279	328.522	256.23	254.946	113.089	147.712	120.729	98.8799	84.7148	91.0459	116.599	131.278	138.011	127.974	124.11	161.232	230.587	321.88	206.167	125.85	111.7	131.97	108.864	349.693	196.037	188.587	218.662	161.341
evm.TU.chr11.310	22.1387	23.7654	21.6207	23.3747	23.1911	23.6868	29.6725	32.05	35.5404	30.9134	26.4146	29.3524	38.0187	36.0022	36.8241	37.7265	42.0608	37.4734	33.6029	34.6453	37.0522	36.6133	32.1042	40.6507	48.7125	18.2614	28.6571	32.9728	30.0783	31.4661
evm.TU.chrZ.329	13.0374	11.6819	12.2034	12.7519	12.671	12.369	19.1646	21.728	21.335	13.835	13.8385	15.5901	31.8054	24.3124	45.5113	21.76	16.7423	22.7868	11.9964	10.4735	13.4202	16.1189	19.579	11.1224	9.22647	17.6466	12.9115	14.2407	26.9191	12.7642
evm.TU.chr26.182	1064.58	1046.09	1541.27	826.854	901.873	1072.15	320.816	836.477	270.295	237.645	409.842	88.7441	235.69	186.299	132.239	117.583	82.2665	140.877	918.171	1020.64	281.46	242.027	559.687	261.653	0.510105	1904.45	662.24	1344.39	1692.86	1614.96
evm.TU.chr1.1366	183.355	188.095	207.944	181.189	147.925	193.023	105.303	143.643	165.455	101.438	86.4671	103.433	140.208	151.461	109.34	112.463	83.3427	106.709	258.631	267.049	239.581	128.065	98.5511	110.936	247.293	172.766	243.079	148.542	142.741	175.324
evm.TU.chr28.215	22.9417	26.1651	21.7613	33.3947	36.6176	38.5041	77.6062	72.8407	77.9259	76.5497	75.8632	83.1916	90.1002	73.8187	82.6536	90.9129	118.753	96.0314	54.8578	42.8364	42.6643	76.4199	89.596	80.3198	53.2965	14.9817	18.2066	30.5509	32.2879	29.8351
evm.TU.chr1.2602	4.51412	4.20704	4.39549	5.87057	6.62907	4.71464	68.5253	122.254	131.141	52.2616	44.9294	40.907	144.126	113.176	121.666	97.5287	80.2634	105.993	98.5477	88.9682	119.983	96.0781	75.2881	66.104	219.499	42.3728	243.88	70.7734	55.4964	74.0354
evm.TU.chr22.45	180.752	194.487	190.316	195.887	153.822	168.002	165.312	167.895	136.161	146.03	104.16	127.211	109.505	102.276	99.1311	104.047	97.3519	112.167	209.887	204.332	205.733	139.284	120.235	128.728	121.891	131.528	130.038	151.554	138.965	145.32
evm.TU.chr5.860	12.4885	11.7083	12.5893	20.5204	24.9401	20.6331	3.83877	9.7231	3.67804	29.0762	9.81888	19.7472	222.804	260.943	233.196	212.002	144.533	370.077	54.5183	38.4969	130.721	93.5762	79.4407	40.3766	0.804838	16.3298	0.907535	151.438	182.336	176.053
evm.TU.chr21.47	431.582	379.4	344.707	447.565	445.436	438.574	268.248	248.204	249.372	237.394	310.834	297.255	190.865	179.418	186.185	201.412	168.927	216.534	293.432	320.759	202.182	199.295	173.936	222.454	236.585	232.726	203.861	234.717	207.907	223.809
evm.TU.chr1.1447	44.1268	40.7692	41.5627	30.1205	30.5393	28.9428	54.5358	32.6969	47.0803	34.9174	31.5689	34.4503	24.2612	25.4694	23.1624	17.9942	17.7093	23.3792	37.7612	34.4678	31.9073	34.1887	30.5108	31.6262	22.0636	22.6494	28.9123	23.1797	30.8487	25.9733
evm.TU.chr18.272	83.4888	83.9356	87.6552	73.587	77.0636	80.578	46.3654	48.8529	51.8734	48.1	53.0722	46.6563	55.8438	55.7342	59.7686	63.2708	72.3774	60.639	55.1523	64.4478	57.6424	49.9198	55.6007	54.9038	46.3767	52.6776	43.0192	48.0817	48.5544	44.5393
evm.TU.chr1.2752	2.79005	6.7746	3.4266	2.77484	3.77114	3.39988	312.71	387.449	544.647	32.5834	64.9848	48.2814	551.722	508.877	239.625	30.2479	42.9063	67.2231	216.682	199.766	257.823	57.788	69.15	40.8961	1326.53	168.983	678.404	105.829	121.712	95.3393
evm.TU.chr26.174	23.3244	36.7653	33.5242	22.6399	23.0614	26.4243	100.937	102.286	115.851	96.1572	123.083	102.789	48.5263	81.9588	50.1397	140.43	185.347	121.863	69.5159	53.5577	75.1378	86.6297	121.793	111.123	51.4007	18.4404	40.2215	43.4201	69.0854	46.9099
evm.TU.chr5.647	241.677	229.697	223.112	192.64	189.045	200.683	132.127	157.775	143.193	127.148	119.202	121.647	145.088	146.544	135.806	143.736	139.227	157.955	212.036	245.421	230.65	159.573	127.776	145.852	121.961	190.8	141.575	150.317	151.037	160.344
evm.TU.chr19.198	53.929	50.9367	48.5038	69.8487	69.0341	67.3882	56.818	52.1041	48.7611	47.2375	79.184	56.4548	48.1292	50.8235	56.4212	49.4389	41.6159	59.8803	39.9164	40.4501	45.4593	38.8272	46.9351	40.4469	50.9714	39.4866	38.8155	36.292	35.2682	35.3985
evm.TU.chr29.303	153.462	148.462	147.099	122.225	130.797	120.79	67.1468	74.6224	65.7801	52.769	60.7001	54.7778	56.3591	56.8673	57.2158	62.4491	58.929	53.9261	110.227	149.577	106.511	65.981	52.6891	63.8953	69.7696	98.3631	76.0487	79.2132	74.5685	74.2635
evm.TU.chr6.189	76.0284	73.7553	74.0428	46.2022	45.2975	49.4404	31.7976	31.4435	25.0474	28.2368	27.7294	29.4269	18.6263	16.1573	15.7179	16.8459	18.3847	19.4639	23.9392	35.9548	16.4465	21.3237	23.3882	21.1915	12.0194	42.7165	18.7158	22.6993	20.2429	16.2959
evm.TU.chr1.748	80.8118	82.5994	75.9123	78.2101	77.0768	81.1608	49.4311	51.9839	59.6325	46.7772	48.136	40.8805	61.1888	61.2901	49.4697	51.5333	52.4731	48.986	62.6853	70.4257	65.7275	44.2495	48.6283	48.6243	51.6537	61.2025	59.5806	65.5125	50.7715	63.8921
evm.TU.chr3.630	6.32384	5.4615	5.86383	8.78398	8.40614	9.44199	33.8333	28.9005	38.7293	34.9181	35.878	36.7704	72.2105	63.9576	64.8509	68.8534	71.7917	80.005	34.0893	28.4625	44.0981	52.063	41.0308	52.0496	54.2067	10.0771	20.8785	33.7493	32.3364	39.0466
evm.TU.chr12.114	82.8711	85.5764	89.5657	89.4993	80.1787	92.6626	68.204	68.837	62.7464	68.9131	69.9084	69.3932	67.7048	76.9748	67.4743	73.0333	69.1827	76.1036	67.8404	73.6112	64.1483	62.4452	64.6544	64.6252	68.5816	95.6915	77.8368	95.5402	90.7624	85.228
evm.TU.chr1.2474	2.60425	2.8819	2.15789	3.52995	3.32053	3.11574	15.2582	14.3686	14.4289	16.4621	15.9394	14.9215	36.3475	31.7591	35.899	24.9144	20.1621	38.3963	15.3822	13.9833	11.5253	19.2164	17.6711	19.0841	68.4604	11.508	28.4036	16.378	16.926	15.2584
evm.TU.chr5.738	319.544	258.438	304.631	232.979	215.646	211.623	128.433	171.19	156.06	107.953	120.896	100.217	146.646	157.902	142.872	144.091	128.383	155.203	268.045	353.078	360.797	137.331	112.836	134.766	187.633	232.092	230.167	171.56	157.621	172.519
evm.TU.chr11.141	23.9247	25.8243	23.351	21.3378	21.7293	22.0193	16.0848	17.8368	17.5245	13.4469	12.7012	13.8968	19.8606	20.2136	18.7746	18.7317	16.6573	19.3003	23.4524	27.9173	25.1868	17.31	16.2849	15.9198	23.3388	26.6611	31.6238	21.0631	22.5977	20.287
evm.TU.chr23.340	336.249	255.337	260.731	352.17	332.596	314.208	250.633	283.108	247.134	288.314	303.214	311.348	209.574	184.598	185.714	251.718	210.598	272.289	303.782	403.997	366.011	204.64	168.23	194.229	227.662	264.71	333.77	290.261	226.82	194.776
evm.TU.chr36.7	37.2465	38.7761	27.6449	30.2162	30.513	49.0802	33.4455	22.3444	19.2157	24.3158	24.4538	26.3874	23.5287	23.0615	26.2857	40.9274	41.5448	35.2725	24.3945	24.4649	26.2658	26.7335	37.9143	24.4873	21.3116	54.1469	23.015	28.5669	29.0865	27.6386
evm.TU.chr19.354	207.854	194.991	224.352	210.333	172.48	171.49	123.761	164.673	139.783	124.196	114.648	131.966	130.268	148.094	119.723	138.276	126.83	141.718	200.565	211.877	251.303	130.97	111.584	119.845	120.98	209.976	193.081	168.075	164.747	177.404
evm.TU.chr2.1193	35.0843	34.2232	30.2895	31.6762	32.2746	33.2898	23.4437	21.2015	21.0422	21.7574	20.7836	20.4883	25.7256	22.9129	27.6105	26.2749	22.081	23.932	33.7592	35.1615	29.4026	27.8294	27.7964	24.2477	19.0137	26.2293	19.4765	22.5271	23.9428	22.3591
evm.TU.chr17.410	184.447	192.219	233.471	175.245	173.391	183.409	107.331	140.946	114.096	92.9932	90.5387	100.409	94.3764	87.21	74.1158	84.3869	81.9108	83.148	124.95	149.427	110.535	85.5551	73.6776	86.9114	83.9596	255.743	165.151	143.007	124.932	135.29
evm.TU.chr4.247	23.4531	27.3221	20.5099	33.3271	34.1939	28.7055	116.901	85.2128	107.604	118.492	123.557	125.806	107.415	118.597	97.1403	88.5362	111.308	84.7807	83.8396	59.3017	78.307	110.443	97.6938	83.8607	125.784	33.6303	108.123	140.719	140.092	195.203
evm.TU.chr8.600	14.8102	14.5792	12.7469	16.595	17.759	14.4597	17.6613	18.6178	13.6327	16.8223	15.0641	13.8703	25.8032	26.0154	32.459	33.0396	22.4397	34.2602	28.612	24.6881	26.9106	28.6797	26.0701	25.438	34.9516	17.4041	29.9158	27.4383	28.3557	25.6096
evm.TU.chr2.1154	27.6037	30.1574	28.1534	25.9756	28.5826	28.0964	21.0479	19.7343	17.6511	18.4798	22.8622	20.1188	25.4758	23.8892	25.2796	23.8472	25.8843	25.2369	23.7749	22.7175	14.9533	22.7937	24.0794	26.4649	25.0145	21.6522	19.7428	25.7321	22.762	23.5487
evm.TU.chr5.113	331	309.328	374.767	358.968	308.326	322.267	193.503	255.73	179.903	193.985	190.26	197.06	227.594	230.017	202.383	253.017	198.652	256.455	342.621	346.407	405.287	248.861	186.85	224.344	162.25	314.071	247.424	266.853	283.441	295.367
evm.TU.chr16.284	101.899	103.042	105.762	110.142	102.95	111.735	66.1963	72.6474	68.9275	59.5387	58.3004	56.2862	80.9738	71.2233	76.1232	66.347	61.4995	77.3025	101.944	107.746	98.0102	74.5689	63.3257	66.5053	60.9301	98.1506	74.6254	83.4329	87.4482	80.7238
evm.TU.chr15.36	102.368	96.1007	92.507	105.54	108.512	110.372	106.688	109.825	107.592	121.821	105.232	109.188	107.272	112.056	134.965	129.264	117.673	133.896	114.036	119.146	143.457	132.609	131.162	129.73	104.952	69.9612	100.937	110.037	108.737	103.076
evm.TU.chr26.197	100.36	102.262	106.711	110.335	111.52	102.252	57.7624	53.9799	46.6195	50.0069	51.5714	63.2104	41.43	37.8016	31.5245	29.7097	32.9871	35.5351	50.55	59.8234	37.1379	38.5001	36.3532	40.9522	36.6967	84.2881	45.968	55.3224	56.6877	57.6992
evm.TU.chr6.270	192.042	200.712	214.074	187.672	191.064	187.08	110.01	102.885	86.8884	78.8554	78.2255	85.1225	42.7324	44.7293	44.3083	50.4617	46.5784	47.4031	63.3968	82.5218	68.9142	42.8808	40.3989	44.3454	42.6459	121.265	81.8691	70.9023	62.7148	73.3885
evm.TU.chr16.302	23.1781	24.0455	25.3588	28.5528	27.3223	31.5802	50.7326	56.9005	48.887	49.0792	45.3132	48.0396	53.3996	48.4251	50.3665	44.1549	40.5736	49.3818	33.7721	27.169	24.1948	38.5044	42.9205	42.017	50.7262	31.7887	52.4295	44.4596	45.1117	45.4139
evm.TU.chr5.345	73.6402	71.8534	65.4438	47.2392	45.5935	41.7501	85.8927	100.374	99.8622	76.5826	70.5177	86.097	85.8381	88.9479	86.8275	93.8731	108.89	74.3529	82.3119	73.914	82.2475	70.2095	93.2483	106.572	120.194	100.964	94.7807	104.934	118.143	122.531
evm.TU.chr5.1083	146.589	132.275	128.094	123.868	135.84	134.544	73.9668	77.0637	67.5034	64.6567	68.3546	64.1387	81.9595	74.1275	86.0493	77.2332	86.5901	77.407	93.7561	105.177	63.866	73.1467	76.2603	82.3184	76.2437	103.824	69.4723	88.1899	88.5489	90.0053
evm.TU.chr16.399	35.7824	37.0327	36.319	28.3063	34.5753	31.1894	29.1069	28.6962	27.4298	24.8373	26.1532	28.8374	31.0466	30.9746	28.313	40.852	38.7022	33.0137	24.6695	20.7693	16.1534	26.9797	33.502	26.6794	23.5162	20.6538	17.9007	17.3468	15.4896	17.731
evm.TU.chr8.350	11.0903	11.7171	12.3066	8.83859	12.4754	9.70967	36.0216	70.5388	38.7089	57.1829	40.9136	49.6372	198.975	147.265	115.486	99.9773	319.804	187.268	157.132	40.3223	71.1174	204.881	66.5201	134.809	217.628	69.5873	134.127	101.979	136.699	144.302
evm.TU.chr35.46	113.302	107.98	99.7534	100.202	101.463	101.243	79.86	74.415	83.3	84.5632	64.4267	78.5236	59.6733	52.826	55.6044	49.7321	62.1808	50.0829	89.4048	103.79	77.9333	80.9517	72.6294	77.1206	51.5655	52.234	47.0416	64.5169	46.2971	51.7369
evm.TU.chr6.1	146.431	142.245	145.951	135.861	140.629	142.622	99.6063	102.098	86.4794	86.0253	85.1332	92.8497	114.632	123.855	138.658	100.932	98.0847	103.709	122.356	132.006	98.6883	98.2778	93.2835	98.1585	126.769	138.291	112.72	115.689	121.687	112.554
evm.TU.chr9.383	123.177	128.602	128.904	96.2483	104.272	128.649	88.3795	90.4891	77.7099	65.7094	62.7403	70.9224	58.0835	62.3345	54.5468	43.1909	52.7817	47.2243	79.9677	102.48	75.0392	54.1772	49.7921	60.6018	45.286	111.922	72.0576	70.9575	62.9628	66.9331
evm.TU.chr15.498	331.831	309.444	312.399	275.917	284.478	292.865	175.761	156.199	119.277	120.86	125.137	145.774	122.019	124.419	121.616	117.522	120.007	117.738	160.525	185.832	104.701	117.617	124.547	126.066	117.058	362.06	201.572	213.672	226.978	194.723
evm.TU.chr3.213	22.9818	23.3686	23.7363	31.2791	32.3436	28.7682	54.0882	66.839	52.9394	67.7856	60.9844	80.6091	58.2879	54.5327	53.0078	58.3375	51.5682	62.6845	36.6828	30.9066	37.4962	49.3366	44.8734	39.2191	46.3677	40.0712	64.3276	95.44	61.3405	111.275
evm.TU.chr4.29	51.9545	58.1264	53.2032	48.6517	52.3347	55.3311	38.8132	38.2281	45.4691	40.1318	48.5723	47.6628	41.6963	37.7494	45.9684	44.5666	47.2888	49.4507	39.63	43.1515	39.8172	40.8212	44.8774	38.0778	39.3198	39.1185	35.7821	36.8997	35.972	39.1261
evm.TU.chr2.584_evm.TU.chr2.583	17.2145	18.5799	19.6506	18.182	20.4611	18.1852	22.1082	16.2256	17.2488	19.0138	25.2077	21.2108	34.8267	26.8775	29.2733	25.1403	22.5992	31.339	15.3461	14.555	12.5403	21.349	22.7578	20.0973	42.8601	10.4112	17.1315	19.7181	16.9366	18.5823
evm.TU.chr27.421	403.69	417.263	514.087	462.293	449.818	458.162	226.1	260.614	249.607	232.965	232.505	235.449	173.124	213.582	148.46	196.198	205.961	202.075	285.705	226.26	176.128	164.541	171.166	197.592	170.912	236.183	200.357	211.164	149.807	213.936
evm.TU.chr11.374	76.5848	77.8255	60.1716	77.819	76.1205	73.1063	55.4513	67.416	38.7057	53.5854	64.8992	64.9924	64.4419	64.6922	70.6489	65.4362	64.4435	58.3005	52.0057	69.4937	48.3713	49.0855	55.1095	64.0861	53.6254	80.2653	62.313	98.6371	69.8506	79.8548
evm.TU.chr21.234	104.453	98.7214	95.8522	83.0206	85.7435	79.8984	52.5706	50.0772	53.8297	46.5211	48.3716	44.0048	55.8913	51.9065	56.2363	54.8806	53.0962	57.3961	66.5502	88.9907	71.9082	52.6284	56.0802	55.1157	64.4384	66.7334	55.2713	50.3465	53.9559	52.0825
evm.TU.chr20.185	34.8499	28.5211	30.9396	44.3682	37.0442	43.8019	50.2896	87.1088	152.887	69.9384	66.5037	63.2164	66.1479	104.062	83.0745	131.301	111.662	119.9	75.5742	49.1923	86.4568	91.8392	99.4126	78.9006	124.56	40.3822	182.133	57.1692	66.1238	55.5276
evm.TU.chr3.1215	43.4337	43.7744	43.0943	43.0266	43.6428	44.5259	34.8846	32.8567	30.2498	32.2979	29.6872	29.3069	31.3857	29.2071	29.7816	27.9096	28.0247	28.6336	31.112	38.0099	30.3078	28.6088	27.5382	31.7785	25.8762	42.4895	32.2684	31.6987	36.8396	32.7214
evm.TU.chr9.256	45.1944	48.0277	47.4652	45.4021	48.3174	46.5664	42.4687	44.3162	38.2462	37.8642	35.52	39.0374	50.543	45.6362	50.5462	37.9293	38.0089	45.7661	50.2879	45.0604	39.4335	45.6516	40.3842	41.778	54.0197	47.189	51.8187	51.8143	49.8645	49.1057
evm.TU.chr21.414	33.2404	32.796	32.4332	32.3988	33.5329	30.4922	21.9607	22.3111	22.4061	18.4532	20.2857	17.4473	27.9309	27.7102	27.4428	28.2658	26.6916	30.2415	28.7674	32.6952	27.9172	26.9962	22.52	26.2056	34.0947	25.4182	26.5037	26.2181	20.3065	23.3648
evm.TU.chr22.42	163.072	167.522	169.437	153.802	151.852	156.139	116.302	99.7461	110.524	98.3674	101.446	88.1149	92.0253	88.9193	89.3023	95.2619	105.338	88.2601	110.913	106.207	111.853	92.7027	105.276	90.9766	69.7665	91.7106	66.3611	80.2995	80.6268	70.3182
evm.TU.chrZ.820	33.0492	31.9785	32.6473	33.1543	32.5882	34.3753	21.4679	23.1026	32.6443	27.2888	17.9379	22.3226	29.5919	29.3948	32.8872	25.6005	27.7437	22.9634	26.6337	31.0778	28.9707	33.7858	30.7541	25.2513	31.3516	21.8989	21.5128	17.4167	30.1233	18.6648
evm.TU.chr1.2482	181.277	180.375	184.65	157.316	150.965	154.894	67.5327	84.7716	64.2191	60.3282	56.7529	57.3915	69.0915	70.0492	69.4886	61.9867	55.834	60.7098	118.505	157.143	116.877	65.0105	52.649	60.4523	66.5614	117.493	84.4696	82.123	86.6259	99.8528
evm.TU.chr22.65	260.84	264.851	281.348	328.18	316.236	335.799	263.154	184.631	245.288	340.767	209.159	250.516	101.547	84.5603	93.2591	127.624	125.804	127.203	258.476	241.391	216.557	234.807	221.441	218.384	23.2929	100.972	49.5648	81.8568	66.0682	43.1083
evm.TU.chrZ.738	16.3472	15.6539	15.8737	15.0274	14.009	11.8212	12.7251	10.847	9.63928	10.4214	10.7627	12.1487	15.6068	16.6481	17.8707	14.2582	12.9447	15.2101	12.619	16.1502	13.6329	12.0839	14.1169	12.4883	27.5804	18.1774	21.6511	18.6759	16.721	13.4907
evm.TU.chr29.266	149.669	143.71	157.243	224.005	308.381	237.017	774.881	825.826	1071.32	842.033	523.968	673.731	806.487	632.571	570.565	448.813	360.01	413.105	881.385	896.789	1401	1030.36	563.327	656.304	1181.58	323.726	1395.4	898.713	580.456	1002.79
evm.TU.chr6.150	56.6962	49.7936	49.5575	69.0074	68.6057	76.9064	113.22	94.0191	100.551	113.359	125.142	127.31	124.403	121.553	101.103	72.5697	92.3405	117.377	61.7119	46.5198	65.149	79.9017	48.6127	36.4542	247.165	37.544	93.0315	39.274	57.0998	75.1851
evm.TU.chr7.176	147.71	132.64	173.917	143.414	141.688	130.64	83.7785	84.6091	76.7151	90.2752	99.8377	80.1041	98.032	101.685	115.492	139.481	140.915	110.68	85.2188	106.463	72.92	126.511	115.631	117.414	57.2781	163.703	97.8075	100.505	110.919	100.834
evm.TU.chr1.2378	209.868	221.191	212.049	200.817	197.03	211.058	494.242	260.998	339.154	225.365	171.167	271.779	263.073	296.558	191.866	102.245	106.539	105.535	130.852	112.139	136.537	180.632	175.685	144.727	150.254	182.541	337.671	543.109	206.171	345.602
evm.TU.chr1.165	666.838	545.221	727.728	780.692	646.433	726.935	435.838	631.052	524.45	482.669	452.486	499.081	463.523	584.056	440.152	595.558	570.194	455.159	740.379	627.27	986.549	585.835	526.846	550.915	511.342	594.269	779.616	553.604	432.347	546.735
evm.TU.chr9.134	160.931	160.188	165.577	161.464	177.944	192.142	202.986	184.055	200.39	229.645	168.91	170.937	176.577	186.904	156.705	162.894	191.148	176.296	170.224	134.155	192.968	165.894	146.235	169.795	239.77	117.685	197.681	162.341	169.425	141.931
evm.TU.chr17.406	67.9162	73.1948	73.4577	73.3054	72.4668	71.5484	64.7156	71.4944	60.7404	62.6035	61.5604	61.1869	57.8668	70.9926	66.4095	70.3934	63.5796	69.4564	75.8333	66.8065	80.8814	59.605	58.0694	57.9344	64.0633	126.193	95.6008	90.496	100.423	89.7172
evm.TU.chr4.300	21.9524	20.7396	20.3247	22.2823	23.8612	22.0103	19.0174	21.0129	18.3627	17.2332	20.0356	17.5888	25.9091	21.8492	24.3103	24.131	24.0639	23.6256	19.9384	20.9396	14.2611	18.7565	19.5828	20.3938	28.4841	19.3912	25.6531	23.9328	14.7108	16.0648
evm.TU.chr1.2011	54.3849	63.4769	62.3722	56.2716	52.5524	48.1414	59.0954	52.489	59.0889	46.5399	47.7444	47.5368	51.3644	45.2592	43.315	52.6063	55.037	49.1002	44.8192	41.9175	49.3926	41.312	43.7066	42.9612	47.7918	31.591	31.4239	22.7567	25.0797	24.8263
evm.TU.chr13.17	53.4522	50.8948	50.8469	46.893	50.9573	47.8957	30.8192	35.8641	33.0151	28.2988	31.0546	31.0089	39.1173	38.7929	39.0384	43.6452	41.2654	41.2497	43.2586	49.1578	38.5873	34.5158	33.3485	35.9328	41.5497	40.7768	37.3674	39.0913	36.3765	41.7836
evm.TU.chr27.334	47.1507	45.2027	45.7623	40.0964	39.6066	40.0531	31.5739	33.7458	31.6772	31.5742	28.8543	28.8096	37.3888	41.7174	41.1904	39.9827	40.1867	40.6207	35.9851	45.1616	39.8445	31.8476	34.614	34.7731	38.8728	50.6246	36.7293	36.1743	38.9523	37.2048
evm.TU.chr29.275	127.402	118.978	125.557	113.874	109.298	117.828	59.2089	77.4227	62.7984	61.9207	57.0741	63.084	56.8326	63.5097	52.1898	67.2676	60.8384	64.705	93.6871	97.4583	99.5145	63.1705	47.763	63.0831	56.4788	109.097	89.7264	84.4534	73.9623	77.6878
evm.TU.chr1.1011	41.8659	39.0248	37.4663	65.1508	62.6897	55.9791	41.7687	39.4792	37.8164	46.6372	42.6116	41.9628	26.7216	25.6886	80.4932	79.6982	67.7723	68.3414	31.2956	22.7595	17.7065	57.4276	50.3325	54.5536	9.43982	12.1744	7.97274	34.5554	38.5361	38.0182
evm.TU.chr31.5	34.8473	34.8988	34.9874	44.0163	44.9691	42.2361	47.6259	42.4647	40.2912	42.34	39.0655	39.8364	31.5855	31.1293	31.0113	30.5016	33.1682	28.0722	54.053	45.3209	39.0972	39.0739	31.5738	41.7517	30.6728	24.1978	37.2406	42.5528	29.3449	35.1405
evm.TU.chr10.461	37.9831	52.7847	47.4303	50.3115	53.8469	54.6075	148.079	100.772	129.554	112.941	104.27	139.182	51.2566	35.9213	35.0232	44.6144	50.7893	44.7607	70.793	53.2634	47.483	85.3781	66.5465	79.2475	60.0174	15.8991	21.4535	41.1821	34.2561	46.7667
evm.TU.chr2.1349	260.652	221.277	256.135	200.526	202.169	193.824	105.829	139.225	140.308	97.0694	97.4352	99.7232	130.057	138.551	136.847	120.551	107.674	129.693	187.369	238.174	242.546	110.25	96.8619	115.137	114.416	209.115	174.945	152.704	130.811	137.797
evm.TU.chr7.657	33.9724	35.9695	35.2216	35.1415	37.0662	33.817	31.9916	29.0627	26.6918	29.1776	25.3584	27.0718	28.412	27.0488	28.5041	24.7395	23.2844	27.2206	36.6693	36.0745	29.2538	30.8656	29.1198	31.5244	34.8045	37.0929	34.6698	38.6037	31.805	35.649
evm.TU.chr12.142	48.4583	46.5008	48.1737	57.1693	50.5168	49.7754	41.0031	52.0989	44.3322	48.393	46.0323	42.1424	45.8657	54.347	45.2516	47.721	51.5844	43.8117	51.7864	54.3654	67.4063	46.1802	43.1941	43.072	59.8366	42.6116	83.9403	64.3029	40.8767	58.3623
evm.TU.chr9.48	101.879	100.565	106.817	103.185	100.879	105.453	73.4194	71.7265	65.874	60.8412	74.7856	66.3571	60.3505	66.0368	77.2495	86.8881	72.396	84.8813	94.9947	112.047	95.0578	72.0451	63.3526	68.81	76.2532	68.2261	63.9237	71.4352	69.7634	75.3037
evm.TU.chr1.592	50.5421	51.9061	58.461	51.0178	50.6339	48.7531	25.3465	29.4981	25.2202	23.2993	27.1459	23.9284	32.1975	33.7133	33.4631	29.0345	29.3076	31.7572	32.7124	38.0713	29.9855	23.1026	23.5499	26.3657	28.0387	33.7117	27.2767	28.2578	22.089	27.8972
evm.TU.chr15.118	11.2093	10.2411	10.2165	11.0124	11.0574	10.9944	10.8034	11.5147	12.9139	11.3629	10.7681	9.07135	15.6007	13.8773	16.3205	14.2874	11.8615	16.0104	11.2127	10.425	10.5791	15.2107	17.9351	15.1408	18.534	7.8833	16.7504	13.649	13.6289	11.8218
evm.TU.chr1.2390	67.9308	67.8933	62.6336	61.7326	58.3849	65.6748	46.1562	43.5416	40.2564	36.1466	37.0095	38.9776	45.6365	46.591	47.1955	49.3867	44.1206	47.2604	55.0475	69.2007	63.0082	45.7504	39.3798	45.6039	46.1864	46.2344	45.319	45.7773	44.9471	48.7402
evm.TU.chr5.479	219.963	211.5	202.169	191.766	192.694	222.028	387.088	439.347	438.868	338.15	297.808	330.655	315.333	302.047	306.024	227.296	250.429	240.784	301.816	282.788	248.674	288.801	245.504	285.162	331.243	203.451	308.974	322.978	229.894	267.828
evm.TU.chr12.345	67.1799	73.7287	82.8256	69.2901	76.4547	74.3709	40.7886	29.441	27.0107	34.8402	38.7122	39.4126	26.2872	24.4449	25.6954	24.991	24.2066	26.7949	22.9219	23.63	13.9731	27.8149	29.3987	21.6001	17.1381	29.9839	15.762	28.7196	25.4334	20.5855
evm.TU.chr10.528	9.12503	8.80444	8.68791	11.0079	11.1941	10.5446	32.0791	30.3591	33.4622	35.9855	30.3272	26.2693	43.7234	46.3653	44.6112	51.1727	41.6322	60.3506	37.3179	23.6972	23.572	44.4954	39.8681	34.8564	36.7555	9.57312	17.6079	32.6117	30.4131	33.1977
evm.TU.chr17.80	172.024	163.331	153.031	127.425	131.983	143.158	157.493	140.277	143.226	135.768	118.71	135.336	131.409	129.029	127.377	121.849	125.417	115.322	175.699	176.839	180.175	139.166	123.8	127.514	144.027	125.607	135.785	163.477	131.406	147.016
evm.TU.chr4.663	136.787	135.093	134.148	101.182	101.43	105.987	66.3027	57.6587	48.2346	47.8454	46.1112	49.2058	65.3364	62.4769	64.7461	56.7364	58.1737	56.1211	83.7864	98.0001	60.5823	61.3295	57.1625	62.3522	64.052	152.029	98.7579	96.5519	89.1354	87.4257
evm.TU.chr9.276	47.5967	50.2901	44.3394	59.451	59.0245	59.0891	65.994	59.6632	53.6946	71.4681	66.8149	63.1738	114.943	91.7942	122.485	95.3818	85.8957	130.448	97.6318	101.739	124.124	116.825	102.338	97.5743	75.0857	66.5333	59.7147	104.183	130.41	122.547
evm.TU.chr12.505	91.168	92.9991	94.7176	120.775	128.32	124.464	68.8215	62.096	62.5158	71.5384	70.5457	70.3651	73.3487	74.5542	73.7988	60.2034	67.4158	61.3807	70.6176	60.028	42.3857	74.04	72.8413	82.1522	54.6312	52.261	40.9439	64.9413	60.5067	61.7347
evm.TU.chrZ.315	27.6696	27.4366	27.0686	25.5173	24.4327	25.4478	19.8503	15.1351	20.8526	19.4852	19.7621	17.9147	20.2762	13.5519	18.4914	16.2769	15.0454	25.6972	24.9279	24.1652	28.8371	33.1699	22.9327	16.4041	12.6284	12.5841	12.7238	11.8904	16.8174	12.0203
evm.TU.chr15.304	157.119	170.394	156.867	101.85	101.168	99.7559	14.2138	23.3	12.7867	6.48415	10.5545	5.46625	3.8547	6.19322	4.60318	4.46422	4.21332	5.38827	25.5612	78.1347	15.4434	4.06079	7.23147	4.37849	1.83584	194.09	79.0084	62.2319	66.0262	38.9302
evm.TU.chr6.102	50.4661	52.1698	51.9711	42.2425	42.9862	43.0888	37.8563	27.0869	25.591	28.019	27.3671	31.3426	32.2592	28.9678	30.801	28.4069	28.1593	28.3461	33.8706	36.1047	27.1931	28.6479	27.5844	25.2761	33.2814	45.7154	36.9207	34.2929	39.2533	32.7053
evm.TU.chr2.781	31.497	30.6251	31.7048	28.2859	29.0702	28.9353	21.7028	19.8671	18.1646	17.723	15.4568	16.3404	18.1874	17.5055	18.2283	18.9873	16.6364	20.7368	20.8291	20.272	15.4107	17.8007	17.4365	17.9159	17.5986	16.9411	16.0225	17.8962	15.5632	16.9451
evm.TU.chr18.169	174.625	175.89	167.655	188.965	169.597	165.161	120.644	115.31	95.1984	111.245	105.738	123.036	51.8928	53.1732	56.5612	69.8304	59.3273	57.4931	141.808	182.779	136.874	82.5833	57.489	76.76	75.2593	181.575	112.917	136.579	127.237	126.671
evm.TU.chr13.41	157.887	180.587	159.272	132.976	139.767	139.434	125.759	129.159	120.282	103.547	120.412	137.353	127.989	122.122	126.498	129.916	123.848	144.578	106.028	146.418	105.364	103.438	98.3906	109.676	111.579	169.557	149.331	118.301	119.308	112.177
evm.TU.chr2.1145	53.7386	54.3466	48.309	60.2796	57.591	59.5497	77.1502	94.5423	87.507	78.0469	95.3034	84.6981	110.167	117.468	114.511	117.795	121.955	101.436	78.8095	78.6499	102.025	74.0283	103.6	87.1958	123.467	87.3396	138.771	82.0561	99.5169	79.7164
evm.TU.chr17.291	31.0295	27.0253	24.0561	34.5857	37.7532	33.3066	48.5088	44.6301	27.7083	33.5644	58.9455	67.6803	24.4539	19.2273	17.4748	25.8232	40.3523	28.401	37.2038	41.4435	19.935	33.5128	22.1708	31.6438	18.6812	64.1385	43.0804	78.1723	72.4275	80.5816
evm.TU.chr27.140	70.0026	73.3913	78.1187	87.9397	76.3309	78.7247	55.3607	61.4273	50.2779	49.0879	45.4863	47.6187	39.2857	35.4512	33.3047	33.7409	33.9014	30.5265	69.0884	79.9287	85.9534	59.6341	41.6296	53.5816	41.0904	60.0369	58.3229	55.2156	47.8989	49.526
evm.TU.chr14.471	188.326	177.071	176.166	148.887	153.719	143.604	133.128	140.69	119.434	126.821	119.879	112.171	77.8334	68.7197	76.3985	80.0657	76.9363	91.8263	150.969	168.776	157.016	156.301	98.3713	135.996	72.1988	222.301	129.474	202.197	184.906	192.532
evm.TU.chr27.15	41.66	41.0099	43.0211	40.0254	40.0935	42.0927	46.7614	59.9099	54.1488	41.0879	49.5607	48.9213	68.2221	70.802	58.4635	68.6329	67.2523	67.4082	54.1591	54.9068	60.1654	53.6599	49.2609	46.418	57.2732	41.4286	40.794	39.9634	39.9893	44.1359
evm.TU.chr30.198	68.2769	73.4653	72.1197	70.623	73.9619	66.1179	45.747	44.8593	40.3744	42.9082	40.9127	46.3841	34.2698	30.6711	41.2761	43.1081	47.6773	46.8795	39.3416	45.6874	37.156	42.9302	34.7475	43.8193	29.2321	36.0542	30.4421	39.5007	33.2946	35.6633
evm.TU.chr12.157	31.4136	29.5724	31.9683	30.4263	32.7103	31.2678	45.5561	35.0464	37.3098	34.5222	35.0419	34.9999	44.9217	45.7211	49.9645	38.3056	35.2465	53.3186	31.1498	26.4737	28.2718	34.5783	36.3229	30.5104	33.6645	20.9616	25.5379	34.6757	34.0257	34.9666
evm.TU.chr2.1369	32.1075	33.4158	33.1686	27.4771	28.5663	29.2469	18.9149	20.1723	19.6562	15.0632	18.6002	18.69	23.1106	21.633	19.1882	17.8514	17.5661	18.4746	19.4375	21.8587	17.2032	15.7946	15.6465	17.4011	27.2741	29.3841	23.956	20.1459	18.5486	18.0541
evm.TU.chr18.432	51.4844	41.7179	52.6652	49.0036	52.387	53.1727	32.9578	42.9936	35.6495	34.2795	29.9513	31.7825	41.3654	43.1747	44.9635	42.1374	38.2853	49.7027	40.3912	38.7661	37.3863	38.2566	42.367	34.082	40.8329	39.4014	36.0446	48.1524	41.1342	48.311
evm.TU.chr2.910	41.2164	34.4881	35.2387	37.3832	37.1169	35.1914	26.026	22.0294	23.2209	22.0065	19.5464	20.0949	28.8213	31.5037	28.1084	31.6165	26.6267	30.3599	33.3612	35.7449	35.635	27.617	30.6647	24.2567	24.0568	30.8173	27.6772	27.4555	24.2718	24.7899
evm.TU.chr10.267_evm.TU.chr10.269	59.6243	59.0075	60.6295	48.5971	46.0669	49.0317	34.299	38.286	36.1234	28.5986	26.6554	29.8773	36.692	39.3245	38.0745	34.9834	33.592	43.0561	43.4018	49.1917	45.3708	31.3692	29.3576	31.3071	34.0933	57.5099	44.711	42.2659	41.3904	43.5159
evm.TU.chr3.446	12.0775	13.0673	14.1979	13.7152	14.6079	14.445	18.7358	18.1838	14.2991	16.1535	18.4743	18.8705	17.1333	18.8784	15.2699	15.565	15.7526	15.4781	14.659	13.3661	12.9392	14.0449	15.5909	15.3019	20.0157	17.1864	19.2454	20.3882	22.7851	19.762
evm.TU.Contig155_pilon.2	4.73274	4.43852	4.62929	8.36458	7.94888	7.42787	50.7483	50.4209	0	0	92.6263	0	0	0	0	194.631	138.815	234.76	86.551	66.1454	174.897	0	0	96.4257	0	10.6978	4.95752	76.4607	0	94.9881
evm.TU.chr3.246	377.276	333.417	333.384	392.621	356.165	364.859	167.709	205.587	182.933	188.092	207.923	190.918	157.588	174.663	163.186	206.179	170.603	181.084	234.274	276.535	224.425	165.434	172.173	183.069	170.62	234.753	201.69	204.714	188.517	213.522
evm.TU.chr16.186	186.711	179.113	168.227	134.564	132.004	137.915	76.3975	79.3623	71.2188	63.0333	57.8933	63.721	56.7437	53.4956	56.3321	58.3851	53.3583	55.4192	108.762	135.99	108.663	64.5108	48.2004	65.329	56.8566	125.078	92.7909	83.2098	77.9682	75.7368
evm.TU.chr1.366	123.712	140.91	130.625	110.795	119.327	121.645	105.75	91.6489	86.8745	93.1636	85.6639	90.1604	110.722	106.304	107.215	101.804	108.119	110.009	120.859	105.536	72.4488	111.814	101.078	111.636	92.0995	115.247	125.88	112.494	105	101.311
evm.TU.chr11.478	47.169	41.8152	43.6089	42.4804	47.5763	43.0453	29.026	31.3187	27.1384	26.7355	25.919	26.844	36.0663	36.5817	36.7644	33.6617	33.6038	33.439	39.9452	41.0088	28.252	34.3471	33.2033	35.8019	36.5013	35.4337	30.1733	41.112	35.3078	35.2732
evm.TU.chr20.48	94.0985	113.189	110.233	110.424	113.291	117.671	72.4547	71.1913	65.9169	77.0432	66.1813	73.079	49.847	39.6419	42.2076	49.4367	59.0993	50.8537	47.1891	43.8221	35.8677	46.6419	35.0478	49.5185	41.0411	61.4104	46.9154	58.0207	45.8638	51.1474
evm.TU.chr13.49	148.77	130.665	145.273	142.013	151.54	164.393	46.4908	39.9965	16.5404	25.3071	55.5015	50.9345	9.78817	8.08283	6.22632	8.20586	14.4933	14.6469	37.2099	60.3808	13.2995	9.22106	21.8973	17.4304	0.0862462	134.502	47.6045	54.5719	72.3025	49.89
evm.TU.chr24.32	120.276	118.745	116.687	102.179	104.526	103.572	111.275	110.612	126.365	106.467	119.618	103.307	127.212	118.947	125.881	126.217	117.661	121.425	97.2136	122.794	119.462	95.4953	101.272	111.214	90.1118	101.896	107.059	90.7009	95.3913	92.0957
evm.TU.chr5.796	40.3579	40.9372	35.2283	34.7462	35.0036	34.7641	34.5099	29.4165	29.8048	32.571	29.011	33.0182	29.707	26.9499	28.0921	31.693	29.823	32.3625	24.7158	28.5528	22.4431	26.4962	26.025	27.517	28.7096	36.7078	29.4873	32.5744	31.6985	28.4838
evm.TU.chr1.1411	76.5157	67.9445	76.5621	72.6274	64.1039	68.5023	42.2932	59.1131	50.4703	44.5572	42.8541	42.992	45.3104	52.9183	47.0087	56.1504	48.2077	54.8019	85.3571	87.7912	102.246	54.1333	45.2206	50.9164	51.1999	89.3319	87.8228	64.5455	62.0432	63.1424
evm.TU.chr1.1957	21.562	24.6133	32.1458	24.0586	24.7121	20.5308	16.2457	16.9325	15.1363	14.1303	17.9895	17.9791	24.4729	20.8283	25.4642	22.3186	20.6659	24.3042	15.4354	16.428	14.3212	17.9579	19.0718	20.1368	22.8752	18.8086	15.4148	21.2991	20.575	19.9039
evm.TU.chr17.283	18.4725	18.2289	18.4088	21.6429	23.3739	21.7979	13.4852	12.9849	12.848	11.8081	15.071	13.7317	13.8015	13.3551	15.1993	14.2006	13.1552	14.2736	13.6722	13.3621	12.1758	12.6218	13.6188	12.0237	14.0927	9.61934	10.519	12.5347	11.751	11.681
evm.TU.chr23.199	663.766	668.087	700.184	730.975	683.933	733.209	771.541	705.245	667.377	659.096	744.438	662.042	639.277	688.345	536.1	679.171	702.893	585.916	736.888	615.086	779.821	805.499	834.022	814.098	634.549	522.89	767.037	783.478	715.252	645.874
evm.TU.chr8.633	17.744	17.3128	27.5469	25.454	27.4504	34.966	22.3743	19.953	16.1187	12.6334	8.32165	9.44835	2.9409	2.30301	3.15828	3.15622	3.74891	4.04951	11.3855	13.8991	11.7846	5.74204	5.54436	5.34798	0.164538	15.6448	4.72313	20.6016	18.091	13.8487
evm.TU.chrZ.263	44.2999	49.7582	46.7089	52.6099	52.5921	56.7788	81.3736	79.4762	75.4269	72.8354	64.9089	69.6029	95.2556	83.1983	83.0635	88.0773	73.5326	73.9036	81.9354	59.8096	61.5353	87.5726	85.0252	84.8175	72.0763	42.8013	53.9246	67.9738	51.577	75.5447
evm.TU.chr3.1643	20.6811	25.7901	27.2084	31.0648	35.2746	27.2322	80.4438	56.1098	109.95	60.3731	64.3081	72.8425	245.032	274.848	176.619	123.059	261.19	160.165	116.206	80.8912	84.3106	227.307	210.49	202.976	219.547	47.5194	195.584	188.423	207.522	212.814
evm.TU.chr3.185	46.4954	51.9229	57.0034	41.2312	45.908	38.3164	40.7975	29.7915	40.1862	21.7157	20.1128	27.8816	28.275	35.2364	27.7517	27.4185	28.448	31.2192	26.3317	24.182	41.7985	26.5852	31.191	25.4607	17.475	7.88601	15.3192	12.226	13.9362	12.1581
evm.TU.chr13.334	69.8988	63.7827	62.3997	66.4519	70.4025	66.9066	38.6267	40.5695	37.7522	37.503	36.1168	37.0074	36.758	34.7581	36.8654	36.5576	36.1959	37.7726	48.7652	53.8605	43.4391	38.7993	33.8515	41.1869	35.6715	57.9012	39.8052	44.6413	45.4952	45.0237
evm.TU.chr14.440	34.1577	36.3825	32.9812	29.905	34.874	31.4336	104.632	84.0449	104.603	77.777	66.5313	80.6107	130.457	87.4118	85.402	87.0768	68.6449	74.3532	64.1207	52.2782	25.4945	51.7325	40.8218	53.7356	126.98	42.696	48.6742	48.1458	35.0977	88.7928
evm.TU.chr1.2544	53.492	58.7253	58.1829	66.9877	78.0621	76.9371	42.2385	69.5459	33.4018	50.3267	96.6947	85.2347	134.135	97.4014	140.979	125.634	147.165	189.945	81.3009	66.5535	48.1314	108.148	75.0513	97.3102	108.898	131.115	92.4391	128.208	118.53	127.138
evm.TU.chr5.1009	24.0938	22.6202	20.583	24.0227	25.8877	24.791	16.4202	17.5619	16.2539	14.7539	16.7458	13.8341	21.2399	20.4981	21.9741	22.827	23.1188	22.9674	21.6906	20.0559	17.0327	21.0765	20.3125	19.8887	24.9021	19.0347	22.739	20.8021	21.0861	19.4756
evm.TU.chr3.595	41.9562	38.234	37.4248	40.293	43.783	37.8074	62.8012	47.5009	58.0645	78.6996	38.2784	66.1401	50.5608	51.4076	61.2011	42.3207	43.4981	45.1198	71.0295	41.6268	45.7692	67.8808	67.3238	56.8684	10.1119	18.5749	15.0896	31.4429	44.627	37.5765
evm.TU.chr28.35	111.74	108.797	100.632	101.393	98.9534	109.382	59.1716	50.509	51.6957	48.6796	34.1439	39.2601	24.979	26.2299	22.5919	24.1993	24.3466	27.902	95.1483	98.9656	93.6398	46.7156	33.4448	39.9674	33.4613	53.0258	48.1385	42.9767	36.8969	30.2711
evm.TU.chr4.882	60.9813	68.4917	68.956	62.1492	64.8537	66.5647	47.8714	47.7344	44.8731	56.4979	60.0561	66.8532	43.5055	43.2035	61.3723	65.7212	52.5998	48.7482	56.3377	58.8333	57.8501	50.0304	64.8359	56.8077	71.9018	55.6603	59.2508	60.3503	57.9279	43.8832
evm.TU.chr12.444	9.81094	9.42085	8.57086	9.63588	10.5824	9.37756	7.23012	7.59156	7.89294	6.79764	7.85121	6.60819	8.7915	8.34944	10.5043	11.3341	9.72989	11.9167	7.25448	7.24119	6.17348	7.956	8.61121	8.13842	10.7936	7.90397	8.45846	8.70005	7.87492	7.41794
evm.TU.chr17.10	513.553	536.382	612.846	542.643	403.36	508.621	170.226	209.343	171.6	178.01	154.409	177.285	115.666	138.639	90.4545	109.335	117.474	119.032	315.466	383.138	302.586	133.383	101.314	144.124	129.306	378.117	244.267	216.761	179.364	220.645
evm.TU.chr1.1692	6.60524	7.10046	5.70087	5.44849	5.80125	4.7083	45.4414	37.5503	22.1625	24.281	28.7828	29.0273	49.1933	35.6051	44.4735	25.8625	45.5851	27.1124	34.8332	17.8437	22.0012	25.0146	24.9545	42.5309	51.5464	38.0838	48.7346	84.9278	55.3566	74.0037
evm.TU.chr2.1117	5.17766	7.11724	5.54181	4.95858	6.48726	6.45374	62.8338	40.0763	67.299	51.641	38.1307	42.4852	40.0909	31.0876	28.6659	17.8093	19.1853	20.3036	42.3613	29.218	36.6758	36.7188	36.2431	34.6015	14.6865	6.27644	19.5088	11.9952	12.8245	11.646
evm.TU.chr15.122	14.7123	21.1612	15.088	19.3417	19.0856	18.9803	17.0058	14.8837	14.4693	16.6194	17.2185	15.2112	7.90206	6.31947	9.74193	14.0005	10.0832	12.4302	9.93486	10.5313	7.72587	10.1711	9.36665	7.55622	3.77549	11.5484	7.43872	10.3349	10.2934	7.59374
evm.TU.chr22.15	36.6476	46.1258	41.6318	49.924	50.2776	43.7616	95.5759	70.2708	68.0024	95.9724	63.9146	87.3718	37.8437	38.155	29.623	43.896	41.2743	42.2204	88.2706	68.5656	81.803	82.5092	54.8308	69.3281	39.7602	27.3231	39.3475	59.1559	39.6144	47.4158
evm.TU.chr27.175	127.205	125.493	131.312	119.478	136.644	131.789	86.6138	67.9661	74.5551	77.3756	72.3146	79.1354	53.2342	52.099	53.9203	67.0212	75.0431	70.7731	67.8925	63.9399	36.6306	71.1586	77.6373	74.1075	52.9989	64.7817	39.2639	63.9214	56.3278	59.128
evm.TU.chr8.315	6.01526	5.31368	4.93095	8.1382	7.9681	7.27481	11.8251	15.492	13.0829	18.0734	17.6355	16.3798	35.2565	28.3988	38.5177	28.8794	25.1156	44.8591	17.7929	17.7299	20.6112	29.8092	20.5835	19.1681	37.3149	9.90518	19.3054	39.9096	26.2474	36.8825
evm.TU.chr3.263	115.266	106.441	103.751	107.442	100.796	109.752	44.3073	39.4464	40.0706	40.7889	40.3755	55.4702	27.0612	18.8533	24.9058	24.8527	37.7836	33.4449	43.1118	52.5075	35.1542	36.0072	37.6039	38.8969	19.2912	47.3195	28.5229	36.8791	33.6876	33.4752
evm.TU.chr19.216	5.26787	6.84688	6.60868	6.17186	5.6194	5.90513	32.5445	33.0682	24.5978	28.8057	31.0999	28.4605	64.2895	50.4639	72.269	44.6569	47.1477	78.0953	45.4369	42.6531	55.2901	46.9351	35.0288	24.5906	32.5027	26.3518	41.832	41.7194	43.2346	49.1049
evm.TU.chr2.443	41.6979	41.1025	39.7417	39.4662	41.3885	42.0018	32.7026	31.9365	25.0552	28.8585	31.4544	29.8476	27.608	26.1708	28.7671	27.2715	27.6957	29.4684	26.0193	29.4673	28.3521	27.4574	28.6705	27.9091	31.8704	40.9656	32.0646	33.2461	36.8172	33.0173
evm.TU.chr27.11	38.6062	37.0415	37.3188	41.9646	42.926	39.7716	28.0279	33.7969	27.5616	27.6664	31.5171	29.5406	36.1047	37.9537	38.4884	38.5212	35.1702	40.9584	33.4472	32.4536	27.2057	29.6202	34.0343	30.6644	38.8883	31.3253	30.5757	33.0038	32.3432	34.9453
evm.TU.chr21.198	31.8044	34.8907	33.3736	29.9576	31.3969	32.0464	23.2957	23.2669	25.1866	21.7693	21.9397	23.065	25.6478	25.8553	26.7206	25.9601	27.4306	27.5658	21.8644	24.1037	17.2904	20.9607	22.6483	22.7748	25.5954	34.7737	23.5868	24.9937	24.4606	24.8231
evm.TU.chr3.593	11.921	11.5044	11.2291	11.2561	12.6038	10.9618	7.92237	8.22671	7.11549	7.22672	8.46119	7.11205	11.8231	11.1994	12.768	12.2398	11.1936	12.9108	8.71085	8.51602	6.36133	9.58217	10.1738	9.92934	10.7735	9.63651	9.07596	9.63562	9.15348	9.19813
evm.TU.chr15.4	50.3072	56.041	33.8662	66.4397	72.002	55.0653	27.351	68.1886	28.644	48.0043	60.3681	54.4128	55.8275	49.3219	45.037	62.0249	235.585	64.1349	97.7389	34.607	41.5234	83.0851	49.093	97.893	98.6652	54.8314	44.722	36.04	106.641	83.1654
evm.TU.chr10.124	59.955	62.8472	63.221	60.2943	60.2537	67.5859	31.918	29.1548	24.6369	32.9191	28.8749	33.297	20.3187	20.6545	21.4048	21.511	20.7502	23.0808	28.0826	35.6698	22.209	20.6467	20.7028	19.298	13.5652	57.6338	29.4851	33.6226	32.925	29.0236
evm.TU.chr25.114	11.9798	12.1471	12.0142	15.1182	15.5952	14.9943	12.6185	12.002	12.3339	11.1375	12.0256	10.7672	34.1172	34.1791	30.2101	27.2171	25.4437	33.9956	15.8148	15.0968	17.0025	19.5763	23.3128	16.8649	28.4301	13.7619	20.7428	15.0758	22.0162	21.6835
evm.TU.chr4.1110	16.1715	14.8877	14.2923	21.6419	20.0448	19.77	9.8505	11.9044	11.552	10.6013	9.27268	10.0905	15.3901	17.6565	15.1068	12.2803	15.3468	15.3163	20.3671	22.1273	19.5532	19.3997	13.0105	16.7109	19.5659	14.3769	27.046	20.107	15.282	19.0662
evm.TU.chr3.370	104.59	103.895	107.142	109.709	108.03	117.524	47.6084	47.9127	47.0505	44.5614	43.2895	39.5605	33.8723	34.0416	36.9341	43.373	46.2632	48.2339	57.6438	57.5569	44.8892	42.174	41.9924	45.155	34.4849	58.5953	41.5791	48.0158	40.891	45.2111
evm.TU.chr13.138	27.9811	27.426	25.7351	22.5294	22.3914	24.0854	14.4604	12.4635	12.6808	12.5057	11.1073	11.7284	13.4012	12.2192	12.5726	11.5013	11.0213	12.5898	14.39	16.8839	13.2823	11.2686	11.1114	11.0192	11.8415	18.2018	15.1082	13.9364	12.3696	16.0137
evm.TU.chr1.2328	64.5916	63.836	49.9568	49.9043	59.2808	52.6653	87.7154	108.472	75.4671	128.271	135.074	82.7728	154.367	185.641	189.879	235.642	216.951	294.496	161.19	147.778	185.595	200.214	192.038	207.503	107.652	45.9342	47.4374	114.504	130.257	145.196
evm.TU.chr1.2713	33.797	32.8726	31.6129	38.5106	43.384	36.1291	32.9884	31.4763	31.7176	26.2521	44.0422	33.5091	35.225	31.4445	33.5422	30.0806	36.0988	36.4629	23.0122	20.1427	21.6745	28.0148	36.0515	30.8075	39.9221	24.5141	26.161	29.8935	24.2781	24.7715
evm.TU.chr1.2659	8.25427	7.75965	6.2916	9.72668	10.5398	9.65161	17.2117	24.8687	20.4573	12.6143	14.5202	14.6803	74.6331	60.8184	62.6139	48.6744	94.736	72.7968	41.2481	21.1348	25.4806	42.4135	26.5926	29.606	49.376	26.6794	43.8165	50.9887	44.0512	62.6142
evm.TU.chr31.16	67.5259	65.6003	72.0815	87.7329	84.1688	76.0234	44.4912	58.2868	44.9901	50.1718	54.274	44.7335	55.0838	53.4051	57.2308	63.9243	63.6995	59.3826	71.35	76.01	67.1196	61.0817	49.5241	60.453	56.0447	92.7195	67.5318	70.001	62.9154	78.3696
evm.TU.chr28.58	64.8824	59.2509	56.8926	83.2032	83.5638	86.3962	43.5192	63.052	53.0325	46.5689	74.5124	66.724	69.348	70.8686	64.4527	50.172	43.7161	62.4419	49.0121	60.6542	49.1828	47.8648	44.3413	52.6952	78.6881	105.375	87.6152	76.1321	74.1892	82.8692
evm.TU.chr27.40	136.596	137.519	157.813	140.286	148.178	155.43	73.2963	72.3711	56.9192	54.224	62.0248	64.7094	57.1495	53.098	44.4539	39.6067	43.6257	43.83	78.6294	68.1889	29.2437	57.7581	47.4102	65.4843	57.3336	172.043	90.134	109.787	85.5551	80.9034
evm.TU.chr3.773	161.053	160.299	180.563	167.94	147.318	157.659	109.638	134.058	98.5915	105.398	101.932	116.001	88.8951	110.94	83.317	92.5431	89.1162	102.698	154.091	160.698	160.766	101.684	78.8395	102.24	79.4683	173.302	131.592	140.379	139.163	144.075
evm.TU.chr7.56	71.163	73.5673	87.8431	66.7465	76.0544	85.8678	80.983	93.8684	78.8602	67.3574	65.9418	74.733	73.3837	74.4303	81.8178	105.768	103.4	64.8431	90.2081	76.5545	80.1323	99.9338	88.0619	112.763	71.3261	55.4867	80.7619	89.071	73.9528	64.1854
evm.TU.chr10.230	117.646	126.046	131.855	138.649	140.659	119.1	105.685	105.178	96.2425	97.3883	77.6102	84.8021	101.645	99.4192	110.239	118.941	135.47	102.712	129.215	126.805	99.4571	138.438	115.592	134.497	107.127	99.3147	90.5266	140.25	113.078	134.807
evm.TU.chr8.170	23.0443	24.4696	23.9577	28.1344	29.4954	29.4288	37.6781	41.6889	37.7965	39.5802	37.0575	46.5957	64.3029	50.6465	59.3281	53.7891	50.0079	45.5823	37.8889	36.5539	33.7352	41.9075	47.2852	49.4139	51.945	30.1264	41.6517	46.9833	50.0093	46.6667
evm.TU.chrZ.583	48.2408	48.5754	44.3088	53.1795	54.5941	54.2156	43.4158	38.1604	58.8023	63.946	40.224	60.6418	65.9511	64.9056	74.9077	49.2307	48.1629	45.7584	36.2581	30.3902	26.2189	64.1914	73.1188	44.3547	61.7649	28.1063	27.5904	35.5472	56.9796	34.136
evm.TU.chr12.96	18.8611	17.782	16.7658	17.2901	15.491	18.1922	13.5206	13.9406	12.1926	12.2885	11.1733	12.1661	12.327	10.7824	11.4902	12.4863	12.1414	12.89	11.6284	13.6201	11.7589	12.4249	12.0879	12.5954	9.30912	10.9904	9.36661	13.1148	12.0559	12.3563
evm.TU.chr8.558	88.4243	92.4546	86.0221	88.8327	81.4127	80.755	60.0001	69.3953	79.2041	68.7063	62.6495	69.017	54.51	59.1755	52.1394	59.5919	58.7345	50.8186	88.6481	91.8482	93.7956	67.7346	63.2512	72.6603	90.3329	90.8098	91.6818	76.4565	68.1004	66.2821
evm.TU.chr1.1061	60.6745	62.6033	57.9292	58.166	60.3562	61.3395	40.2611	34.785	37.9446	38.0708	32.2942	32.9766	35.0539	35.6561	32.2919	36.3163	35.5206	34.7141	46.4251	52.822	50.1667	40.1179	35.1338	36.2059	35.6912	65.2691	43.2228	38.6334	43.6923	42.741
evm.TU.chr4.1063	186.48	185.853	201.833	195.847	161.917	171.28	85.3456	88.5614	103.316	77.8159	55.8918	67.6907	55.8308	58.3897	58.8765	64.1068	55.8677	60.1195	168.781	197.848	172.22	90.9428	67.9206	90.3434	54.9769	118.755	80.1673	94.599	77.5078	75.4856
evm.TU.chr5.673	67.2574	67.8691	66.2858	55.7033	58.2145	60.4299	36.5124	34.2602	38.3126	31.6243	27.8515	28.8649	36.1042	32.4456	33.0719	35.379	36.091	40.2005	45.2713	57.7922	41.4065	36.9171	34.2939	39.0375	36.5841	48.8795	33.4152	35.2292	36.4783	40.2959
evm.TU.chr29.140	29.3456	30.433	33.9413	26.7854	29.5037	29.8691	27.5847	26.5041	28.5944	24.7784	27.5661	32.0142	36.8655	32.8245	34.1225	33.8648	38.03	37.455	23.4518	25.4722	24.3166	26.2303	28.4373	27.2643	35.4088	22.0112	25.8901	21.2968	19.9628	18.8693
evm.TU.chr1.2013	66.4142	65.1911	59.796	70.396	66.5342	67.648	37.0709	41.2753	31.7869	31.6038	38.9966	37.0984	46.3166	46.7858	51.395	49.9582	43.7985	43.1356	54.5826	65.254	50.2562	34.6157	36.7692	41.5787	51.4731	68.8062	54.7213	64.2276	54.0665	55.9683
evm.TU.chr27.9	0.121635	0.314891	0.120339	0.52361	0.563932	1.43281	62.3087	18.5701	77.4562	166.947	60.0418	65.6538	265.616	251.409	573.048	543.025	970.79	181.898	247.123	119.103	197.874	361.509	202.698	257.5	31.0053	9.5002	15.6212	59.3156	32.2465	51.0947
evm.TU.chr29.153	281.56	315.534	275.12	265.778	233.477	227.516	157.583	166.736	166.302	141.593	156	139.084	130.922	158.863	133.727	155.653	160.694	168.816	225.491	340.789	301.096	142.054	140.668	159.924	156.175	194.307	219.439	147.801	129.49	152.018
evm.TU.chr21.31	107.016	105.246	95.868	122.616	119.055	124.222	163.322	202.803	184.246	148.316	213.148	181.77	185.467	162.48	140.238	114.817	129.902	171.269	96.0126	86.9629	87.0772	117.915	143.02	109.201	226.032	171.533	185.358	124.203	116.725	143.926
evm.TU.chr20.270	26.0375	30.9206	25.9862	23.5984	29.026	28.6255	83.3727	104.999	94.724	71.1703	77.8753	84.8195	136.255	109.642	124.014	100.821	103.826	106.049	121.76	108.58	123.24	100.18	83.1729	109.916	195.159	46.7327	65.4744	87.664	81.7134	119.642
evm.TU.chr15.410	149.008	151.758	156.116	114.776	124.917	132.761	66.151	83.2724	74.8825	51.1258	64.125	50.6478	89.7604	79.09	80.3789	77.5931	73.4674	86.0017	108.145	131.629	111.62	60.6316	56.877	64.7861	98.9443	107.112	93.5	80.3601	77.4273	99.7008
evm.TU.chr30.89	29.242	34.1266	39.4152	30.323	41.715	47.2756	28.6918	28.7204	33.2146	50.4009	40.8615	47.3884	15.3853	13.5801	23.258	27.389	23.0084	39.551	6.94994	4.4694	3.91571	22.3535	27.002	39.8476	0.47664	1.42978	0.417321	2.75909	4.04124	4.73371
evm.TU.chr1.186	28.5531	32.4779	28.9572	30.0543	29.8486	31.6958	40.4189	45.7821	38.2983	34.2037	37.7423	40.5383	73.0907	65.1359	72.6685	48.3743	44.9542	51.3385	47.918	50.8141	48.4655	41.0835	41.7137	38.86	120.339	54.9147	84.6834	61.4294	67.0343	50.2485
evm.TU.Contig1163_pilon.2	126.788	111.394	122.085	98.695	90.1427	95.2972	62.0686	50.748	35.7106	38.1162	47.0447	53.9566	22.3867	27.7411	22.7493	30.553	31.9675	28.9503	49.0278	72.9944	50.4015	25.2231	27.1607	26.5416	19.4067	94.2098	69.6602	58.6639	51.9632	38.9337
evm.TU.chr3.57	78.9166	87.5721	99.3477	89.7946	100.01	107.746	96.4467	88.0313	94.217	92.4366	102.702	103.936	114.565	96.7224	89.8809	72.5206	100.379	70.2923	71.164	43.0441	22.5028	81.1415	100.223	103.489	131.195	54.8671	78.0327	84.7892	61.3121	82.9422
evm.TU.chr4.897	90.041	97.1476	113.461	91.7029	82.6287	89.008	45.1762	36.6428	28.684	26.2339	33.7974	39.1059	42.1012	34.2152	40.9604	34.3668	33.0818	37.1351	44.8887	52.804	32.725	37.0152	39.3771	31.6228	35.6915	99.9574	59.353	74.0134	78.0855	64.1225
evm.TU.chr3.1161	33.5593	37.0252	33.9984	29.3965	35.2319	32.9196	45.5313	33.7446	24.9805	28.1497	37.9665	47.2661	6.92092	5.05223	5.42417	5.69608	8.36187	7.6829	13.7535	19.5063	4.19467	5.13665	11.5037	8.09521	0.0890385	127.854	45.0263	41.0584	59.7781	44.3518
evm.TU.chr30.12	134.9	130.51	116.595	110.212	99.2155	111.58	82.7049	84.9171	87.4099	70.1768	74.5825	81.0316	92.6016	92.2159	83.7742	92.1869	102.108	102.227	105.041	129.672	116.35	91.4602	84.9429	100.762	71.9459	120.383	88.2744	90.2493	92.6629	94.0992
evm.TU.chr7.546	25.7865	25.4686	26.4046	25.9728	25.91	27.0972	19.3359	16.288	15.2029	18.6321	18.7195	17.8688	22.3881	21.3163	25.5432	25.542	21.3432	28.0351	20.5792	20.4542	20.3702	24.7125	25.3354	21.14	12.0664	17.2973	16.6319	19.2388	25.0672	19.8383
evm.TU.chrZ.644	18.8823	17.4589	19.1892	18.9243	20.5844	20.8039	13.8145	12.5841	11.6301	12.8166	10.6452	13.6801	9.3049	6.49834	10.5033	7.24326	8.20089	6.64943	12.0243	11.8982	6.79936	15.0799	10.5703	15.9125	9.31446	16.4743	15.8756	17.2298	16.336	10.6467
evm.TU.chr2.1210	6.21789	5.71123	4.96995	8.89192	9.9794	7.98966	38.6638	144.473	33.2611	56.3561	59.0057	52.7006	55.5015	115.98	63.0729	288.192	272.205	193.963	62.8493	107.41	201.256	102.951	79.5756	85.1399	56.2394	19.3574	57.2137	29.2815	81.7663	76.4228
evm.TU.chr13.416	166.56	181.307	152.872	144.791	133.656	141.218	35.5951	43.5491	31.9632	30.1378	28.0077	30.4233	24.8346	29.0497	22.7526	25.9972	24.78	24.811	46.0267	66.8691	36.621	34.3756	27.1873	35.1354	33.9863	170.688	77.7178	83.2839	74.7958	60.9642
evm.TU.chr4.173	144.445	140.475	152.274	124.315	118.233	124.864	110.353	118.152	112.523	91.8421	81.4814	87.8452	137.312	146.067	127.51	113.134	115.705	119.893	143.354	160.797	159.897	127.752	130.197	132.332	196.172	182.877	153.659	150.705	151.456	149.789
evm.TU.chr26.341	118.101	117.703	122.173	98.8598	92.5774	100.377	60.3384	69.8019	60.7804	51.5175	58.0892	52.4583	55.6419	65.0313	56.0019	60.1368	57.4185	69.0942	86.2543	104.574	97.4665	60.0813	49.7753	55.5466	53.0518	97.7326	84.5258	72.0551	72.8942	73.5535
evm.TU.chr13.270	92.3439	87.7613	95.4661	68.1183	70.7358	72.8581	81.8437	81.065	84.7054	78.62	79.0072	83.0417	88.8359	85.9142	86.1101	90.9004	97.4907	108.435	88.757	79.6169	90.2634	83.9858	77.7721	82.8196	70.6031	40.6836	42.8416	53.8313	61.5226	52.5326
evm.TU.chr6.247	105.676	111.892	108.603	106.33	103.29	103.832	71.3671	80.4769	72.6922	50.3527	54.1079	55.3671	78.1651	80.712	77.0184	68.745	65.8819	77.4589	89.5472	97.3751	91.1745	71.8002	67.8831	68.4671	77.832	102.823	82.1307	70.9667	79.7111	83.2198
evm.TU.chr4.539	9.2178	8.61558	9.42654	9.01179	9.26984	7.86882	9.03792	9.25199	8.29724	9.20435	10.9855	9.44725	11.2298	10.2092	11.8773	11.9094	11.1801	12.0836	9.52705	9.81535	9.4305	10.4033	9.5084	9.70387	13.0586	11.5515	11.1985	12.8366	10.686	11.1701
evm.TU.chr1.680	168.741	148.82	142.203	123.803	129.906	154.048	51.4451	31.323	24.6419	42.1981	57.672	54.7794	19.4721	17.0042	24.001	27.9732	36.4435	36.7212	34.2083	57.2967	21.5408	29.357	35.4166	30.3311	3.6674	94.4681	46.2311	50.7882	56.7597	42.8146
evm.TU.chr21.294	222.826	224.513	223.346	197.534	188.7	184.672	105.101	111.794	102.853	92.4672	83.5575	89.5131	114.863	103.279	120.271	108.255	91.4214	121.32	193.151	214.086	209.989	113.713	105.274	105.294	113.825	174.628	132.071	121.853	143.436	115.778
evm.TU.chr11.428	4.33235	7.00435	6.80257	14.6069	14.1603	13.0432	69.0219	82.0724	103.346	71.0703	57.0314	45.972	91.4135	69.8342	84.3197	90.5402	61.424	106.655	84.4993	71.986	87.3646	103.43	114.876	84.5537	319.406	60.0599	335.782	71.7077	109.69	76.0375
evm.TU.chr7.552	57.1743	57.9095	57.6262	47.6235	49.7628	48.3075	90.7195	92.7452	108.902	94.9486	84.3667	78.5127	137.943	106.564	127.49	105.857	99.0208	108.963	87.9561	85.4373	88.6407	109.402	110.828	94.2891	79.6888	54.7107	93.1181	154.7	91.8734	125.766
evm.TU.chr16.41	31.258	30.1716	31.6365	28.1502	28.7592	27.9522	22.738	20.6209	18.2764	19.0373	21.563	22.0213	20.9492	19.738	22.2111	23.2256	21.034	24.1614	19.6031	21.5194	18.7737	18.3831	19.0918	18.7936	18.2716	32.1193	22.1704	22.0997	24.6467	21.1371
evm.TU.chr14.472	23.6018	23.6779	24.2012	23.4954	25.9597	25.1375	15.1045	13.6651	12.5958	14.7273	17.0499	16.2987	14.6901	13.2693	16.2547	18.2294	19.5463	19.7208	19.8054	20.6098	12.9206	15.7626	16.7599	17.5249	13.1447	20.5486	13.223	16.3843	15.4967	15.3526
evm.TU.chr7.600	7.37509	8.71274	9.24906	14.0854	14.4039	11.6006	68.9713	69.3093	89.9792	83.2202	64.9245	59.2676	70.7246	68.6831	61.5356	102.276	94.0468	69.7387	75.3575	49.2195	96.9999	118.506	90.0663	82.5938	129.617	32.3243	153.144	152.54	100.758	135.676
evm.TU.chr15.434	14.8616	11.0842	12.6611	24.0416	20.5315	22.3371	74.951	78.1175	104.794	117.14	124.68	88.0887	94.9556	95.953	116.705	113.088	103.13	135.313	82.1271	52.5855	123.783	86.7694	101.783	64.3317	27.1632	13.9636	3.70206	59.1047	78.6001	77.6673
evm.TU.chr15.425	1103.47	1079.52	1033.24	847.546	819.054	540.295	575.129	588.725	396.697	277.263	323.785	447.042	577.129	553.828	369.432	439.79	329.139	259.642	435.827	718.595	544.873	250.882	398.632	313.402	283.568	601.421	194.813	234.84	300.453	484.504
evm.TU.chr8.356	44.8875	44.9995	44.4242	44.5078	42.1138	44.5241	33.825	35.4114	28.9639	27.3704	22.2014	25.684	36.4524	38.7067	36.5278	29.1805	29.3391	32.3931	39.3294	41.0262	39.4345	32.6263	28.2998	34.7787	35.007	52.457	44.9826	49.4704	46.4098	42.4575
evm.TU.chr3.1706	35.2647	38.1325	37.8401	36.4569	38.6477	35.5206	27.5108	26.8383	27.6911	30.3405	28.0772	28.2205	27.2902	25.3343	25.0379	24.441	22.7363	25.9518	33.0642	29.9972	29.0873	32.3727	28.7199	30.5504	30.9196	31.0431	27.8582	30.2863	31.0239	39.1337
evm.TU.chr11.178	63.0137	57.9408	56.7681	67.263	58.0708	61.2389	48.469	59.563	51.5175	52.3272	43.7102	45.1574	55.0811	55.2296	57.0421	59.4181	52.1379	59.712	69.4346	83.2919	75.2905	59.5626	51.6064	60.6755	55.2144	67.6318	61.7736	71.7818	67.4028	69.7283
evm.TU.chr16.169	14.0243	14.4794	14.6077	13.7582	14.1512	14.5554	26.8248	20.8774	23.2087	23.2561	18.7503	25.2484	22.7741	22.4939	27.4934	25.9229	21.4378	25.7733	20.2519	16.9904	17.6286	23.0051	24.0662	23.1434	24.029	9.88914	13.287	18.1328	19.493	20.3204
evm.TU.chr27.271	84.5706	88.1914	96.8359	92.1397	95.0883	82.6413	105.668	123.337	131.896	104.058	97.8083	97.7459	133.731	123.726	116.939	101.528	110.854	126.627	88.0261	86.5848	94.2759	87.3348	83.492	89.834	163.068	92.5151	117.978	99.7147	89.2108	113.877
evm.TU.chr2.1131	14.965	19.8285	17.9225	26.6876	27.2757	24.9104	14.3803	9.59956	12.3379	15.9199	15.1296	16.1294	10.5628	11.5859	14.8183	17.8026	15.9544	17.4231	13.242	10.6087	12.9083	17.4821	16.9278	16.3555	5.47199	5.29598	5.67843	10.9071	9.85927	9.24805
evm.TU.chr25.398	26.8212	22.4376	24.6912	21.9807	23.9315	21.2156	17.2901	20.3159	14.5824	14.8798	15.4266	15.1117	22.932	18.7642	20.6461	20.9886	17.4884	20.7052	21.2047	29.2134	17.3401	16.582	14.7609	19.0599	27.0916	36.1226	28.7751	29.6988	25.5333	26.3466
evm.TU.chr29.120	0	10.7259	1.62875	4.07498	15.4967	6.33991	1220.37	128.981	863.354	9.58348	1.46351	10.4045	0	0	0	0.0610948	0	0	0.0630323	0.960518	0	0	0	0.0576257	0	761.541	482.985	190.102	331.803	186.684
evm.TU.chr14.494	28.0372	22.5234	26.2813	29.8446	31.9337	31.2373	41.5337	36.299	31.8045	44.7127	68.134	35.7445	35.2804	42.7779	47.2524	53.0397	45.6742	67.4503	41.0382	47.6147	18.8263	40.9083	78.4866	53.2356	3.35576	13.7371	3.97387	21.5339	22.1142	20.6279
evm.TU.chr3.300	13.0891	15.9543	13.9838	18.7329	18.6096	17.9758	40.6157	33.2281	37.1071	46.8116	39.249	46.6793	26.9112	21.1696	22.7668	27.0801	25.9469	26.2871	35.6336	29.8196	42.2639	35.5213	31.3654	32.873	26.9577	11.0823	17.5365	29.2951	22.7705	24.0177
evm.TU.chr29.300	17.1311	17.7699	18.5365	39.6239	36.5078	42.3373	56.0347	59.3535	62.7184	89.7566	85.0203	85.5921	60.1253	62.8029	46.628	108.26	124.044	89.7868	102.817	81.3218	110.231	129.689	135.75	129.204	61.8437	30.8347	54.6237	93.3659	133.806	133.637
evm.TU.chr11.197	34.7316	42.3144	37.161	47.8842	50.3477	48.809	79.4992	71.7096	62.5454	66.5067	76.708	56.8844	140.377	161.352	206.707	136.966	98.7821	170.002	65.3771	40.9038	25.9313	93.3717	113.203	85.5787	59.5929	41.0205	47.8033	107.715	80.6731	88.584
evm.TU.chr3.376	40.5068	39.5743	37.6992	32.7658	26.638	31.5594	34.0779	37.7414	37.3578	26.5709	29.9211	26.1766	52.5811	44.3907	44.16	33.2302	38.2659	39.0706	44.2069	49.4856	45.1286	31.8783	33.9949	30.0741	64.5969	42.233	48.6895	45.0932	46.1072	44.9157
evm.TU.chr6.519	112.56	113.011	115.14	130.182	123.796	127.023	86.3608	112.628	85.2523	77.7747	78.3238	78.7904	107.675	103.681	93.2005	90.1598	87.2098	94.4399	131.639	123.738	120.683	120.488	90.2495	128.944	133.724	126.617	128.08	159.479	127.005	144.736
evm.TU.chr19.16	60.7758	65.768	61.2854	62.8355	64.9578	80.5962	50.2367	58.7032	45.7515	51.2862	38.5184	62.9853	21.1801	21.586	19.2732	16.6709	16.5175	16.3745	56.9562	61.3719	41.2276	45.7048	22.9284	41.8468	25.1085	62.2674	42.2056	44.5724	47.4676	50.1473
evm.TU.chr28.236	18.5251	16.1624	15.5309	23.4836	25.0208	25.2061	64.8583	68.6551	60.3911	60.3567	50.1631	63.6818	144.273	90.7216	161.508	103.817	101.422	116.29	84.726	73.0911	60.8926	114.728	97.9465	104.39	84.449	33.4755	53.863	92.6658	76.3385	107.825
evm.TU.chr3.1467	35.7571	30.8142	30.5789	34.7501	35.7501	34.6271	23.906	23.5652	22.8255	21.3435	27.5697	24.2817	26.4126	26.6693	30.5986	29.3624	27.7629	31.1119	27.2622	27.9577	21.8596	23.3345	26.612	23.724	30.7167	27.2599	25.8461	25.2244	28.4216	22.5151
evm.TU.chr1.1933	41.4553	38.1713	40.6751	38.5957	29.9199	28.7742	26.4334	28.537	25.3789	25.4241	22.782	22.9343	28.5713	21.4624	30.3479	23.2578	20.3803	22.8067	31.8507	36.1275	29.3191	21.3961	26.8859	25.7481	23.4764	38.3577	24.8655	24.6573	28.427	32.8319
evm.TU.chr12.425	73.3755	73.1836	61.6972	66.4502	67.4619	70.226	69.9805	65.008	61.6318	61.9064	61.6614	63.6017	75.6336	78.3297	84.5617	81.8644	77.1815	84.662	71.136	76.3535	72.8731	63.8848	64.8029	64.7901	75.2613	60.6557	68.6494	70.2592	75.8982	75.6295
evm.TU.chr3.435	18.8374	19.0474	19.4318	24.1402	22.226	21.7149	16.1609	19.8048	18.5767	17.1264	15.6163	15.7097	24.4931	26.8539	26.5026	20.2663	18.7508	20.0519	25.5017	26.2515	28.4349	25.133	22.1374	22.1578	26.5005	16.5222	29.1458	25.7372	20.2526	20.9972
evm.TU.chr7.519	42.2362	44.1739	44.0177	39.8935	39.734	41.3923	22.4798	20.1904	16.9118	19.3893	16.5737	15.8403	31.7571	27.9474	33.6155	22.0995	17.6801	23.7431	18.42	23.2947	14.1585	14.8108	17.1719	17.4561	20.5753	22.0456	19.6205	36.9346	21.5455	23.0322
evm.TU.chr35.14	31.3044	33.7221	33.9361	26.5523	30.5892	32.2992	33.852	31.0102	28.7346	29.9101	30.8662	34.7979	33.1322	25.9243	28.3975	29.2901	30.2709	32.5696	29.5633	27.9436	21.5664	31.2183	29.9792	33.0324	36.6132	23.8163	23.9054	28.1266	23.332	29.0253
evm.TU.chr5.1178	70.2082	67.7795	67.19	51.8333	54.5562	57.2802	36.7585	35.4278	30.2475	31.2323	34.8534	36.8235	44.6832	39.964	44.0185	40.4938	46.7307	45.3271	40.648	61.8863	44.9542	40.6342	39.1943	44.7632	35.2826	68.7454	48.076	51.0875	47.5226	44.7934
evm.TU.chr26.300	79.3292	78.1077	77.2989	65.7679	65.7392	69.3826	32.1952	37.7778	34.7593	34.1264	31.7267	32.4025	33.0331	32.6013	31.3886	34.2929	33.4643	34.7182	45.5511	53.1378	38.4533	34.1225	34.751	35.8821	27.2625	50.0367	31.37	37.3615	34.7133	38.7281
evm.TU.chr32.13	1002.24	981.509	1133.12	959.333	1031.91	952.598	361.976	314.99	354.68	326.088	204.821	286.821	136.583	109.815	140.652	146.898	116.441	164.604	488.722	530.885	450.87	282.21	205.118	271.716	205.274	360.418	206.997	276.962	227.588	268.197
evm.TU.chr16.519	4.50693	4.58141	3.54871	5.62014	5.85993	4.53809	10.3986	13.7128	8.68109	12.5195	10.8517	11.257	29.8074	22.0035	26.566	15.7295	17.14	22.1015	13.3598	9.19128	6.85741	14.7805	17.6186	18.2448	16.7072	5.0476	9.03091	17.5945	14.2791	15.0832
evm.TU.chr27.85	72.8169	74.7127	65.8198	48.0595	44.5422	47.3556	30.4567	29.5865	22.7018	20.5193	24.2485	27.2216	35.587	34.6246	28.0698	22.3754	27.4864	23.4554	36.3445	53.1319	30.0819	20.0586	18.4293	20.5691	23.9075	55.7995	39.4759	35.2736	28.219	43.8244
evm.TU.chr22.72	136.456	147.455	161.029	168.584	143.431	136.085	43.5927	37.909	34.7344	36.2422	38.1726	35.4925	27.7208	26.5799	25.7062	36.5692	39.7551	34.5843	44.9766	60.8635	28.7304	34.5697	32.9953	40.1541	21.8106	62.5674	38.0064	39.6275	30.5444	26.6371
evm.TU.chr5.574	43.1158	44.7413	53.8281	57.2406	55.6624	58.3284	69.5721	71.1264	58.7439	69.1213	79.8783	72.1649	90.9307	93.735	96.3844	130.155	105.199	135.36	70.2763	69.0945	92.7499	86.1634	83.1164	70.7669	80.7485	66.2897	57.1035	65.1867	78.0474	75.7068
evm.TU.chr3.214	39.6109	35.0163	37.8967	32.0681	32.9081	32.7626	19.6216	22.7789	21.0943	13.1864	13.0524	11.8817	24.6652	21.4759	24.6969	20.514	16.7354	22.2848	34.0081	38.312	35.8646	24.1428	18.3307	20.5913	27.863	34.0913	29.4755	26.8788	32.2614	28.7902
evm.TU.chr1.1294	27.8188	29.9252	25.6908	35.7267	32.3648	38.3309	48.5938	47.3062	50.2263	68.4709	51.8455	54.7788	28.4132	29.6845	23.815	34.6539	32.7463	27.4995	69.6629	55.4591	76.4598	54.3913	41.6	43.6871	28.3158	22.8111	27.442	39.7871	32.4904	33.6373
evm.TU.chr3.114	177.762	163.864	153.809	132.969	142.583	143.904	59.9905	71.7137	60.4613	56.6593	58.256	60.8273	80.5458	82.4511	82.3882	76.8523	59.9747	82.4922	117.902	164.602	110.217	88.8337	60.6806	77.0511	78.4595	116.932	102.915	103.86	94.5022	99.4364
evm.TU.chr31.41	39.359	39.157	38.328	38.4792	37.1539	36.3702	29.9785	29.0723	27.8251	25.338	31.7062	29.8724	34.1507	36.0191	36.4316	35.3782	31.8988	38.2918	32.8329	36.3019	34.7419	27.5323	28.7532	30.7052	30.6095	28.0979	29.8255	27.6347	25.7219	29.0154
evm.TU.chr16.76	29.6648	28.6425	26.6485	26.0913	25.2539	24.9109	20.2425	25.6333	20.8947	19.1763	18.5682	18.3225	26.7159	30.6451	35.6406	24.2519	22.3561	22.573	24.7702	32.0535	30.3388	23.0859	19.8037	23.2628	31.2317	24.1183	34.7123	30.8301	27.7419	28.3977
evm.TU.chr1.2182	36.3745	26.4883	26.0709	28.7266	27.7329	32.3036	28.9633	28.5955	27.503	25.2043	34.8855	31.2836	47.229	56.0924	60.5765	63.6045	59.7004	66.9467	41.2445	31.4735	32.9209	42.7077	45.0129	55.1545	42.5172	41.0002	35.2998	40.0094	49.268	41.1042
evm.TU.chr9.297	32.3927	32.0143	34.9848	39.9663	39.7136	41.4367	36.6937	34.0616	32.0031	36.5084	45.3842	36.5977	41.361	42.0211	52.0254	55.1125	47.1957	56.6222	36.6077	31.5815	34.7002	39.3139	43.4699	37.1232	29.803	27.4376	25.2414	33.0845	31.3204	30.0817
evm.TU.chr1.1493	20.3601	26.6236	23.7912	26.722	25.3816	21.3184	33.9151	25.0531	26.3506	29.2514	24.6482	24.2738	27.2976	31.2944	32.4005	24.0472	17.8006	28.9222	20.4445	19.5492	21.7267	22.837	20.6049	20.1352	31.532	28.0755	18.9301	23.8314	34.8385	26.8819
evm.TU.chr11.427	8.08982	9.64423	8.82959	20.2008	20.4096	17.1128	59.7786	39.1021	54.0857	76.2682	66.0996	68.9292	22.1235	16.1034	20.0915	24.6156	20.307	18.3706	44.536	30.8247	39.298	51.6436	59.9541	67.5977	59.8043	25.3716	81.4242	48.5594	45.2137	41.0429
evm.TU.chr21.52	15.33	15.653	10.1905	15.7552	14.3208	15.7333	64.4282	238.491	205.572	116.567	90.0835	160.481	19.6783	25.5694	20.2552	20.9928	49.5192	37.753	17.4547	17.5271	14.1985	19.8188	34.3657	29.4877	12.5463	402.058	173.338	90.2526	182.005	101.536
evm.TU.chr3.451	62.8185	61.6515	54.6865	56.7234	53.9725	58.6427	26.9705	22.2839	23.7084	25.4366	24.667	25.9103	26.1268	22.7884	26.6364	30.4361	27.8462	25.1283	48.028	53.8748	33.5513	30.7968	29.3274	37.1969	26.7742	42.2625	25.5166	31.4714	28.7588	26.4281
evm.TU.chr12.285	12.1125	12.6158	13.3092	15.5126	14.8371	14.8042	16.578	20.8823	15.7849	15.7295	16.6714	18.2813	17.5746	17.5881	18.3673	17.0985	18.0755	19.2187	16.1206	14.8852	13.9184	15.6468	14.8424	16.4293	16.4459	19.1885	16.418	17.9727	15.256	16.993
evm.TU.chr18.271	76.0518	85.4394	88.0431	79.8832	78.1682	75.8592	72.5986	71.6513	68.3104	52.2554	43.6472	54.767	51.3874	51.9962	54.0756	51.706	58.741	52.0626	55.0268	69.1506	60.1308	54.4984	47.9397	50.4876	60.4301	72.9612	76.8142	78.0464	55.6374	59.5716
evm.TU.chr12.348	69.2085	70.1584	78.0979	84.6288	85.755	85.2022	77.1675	82.4492	79.9306	97.6684	101.181	89.657	151.621	145.986	206.171	177.969	152.674	224.273	152.15	118.873	155.683	185.712	186.491	152.039	87.1239	79.429	79.4154	154.565	166.512	150.338
evm.TU.chr8.523	46.4575	47.5613	46.0146	40.8954	40.0962	39.2139	22.9894	24.9209	22.4817	21.0587	21.7462	20.2376	30.946	28.7882	32.9911	28.3529	25.3895	33.0254	32.1263	39.2453	32.9868	25.2936	23.8389	24.4589	29.5369	30.3243	28.3361	30.2644	27.5687	28.7836
evm.TU.chr5.303	29.8695	31.2212	29.5614	30.9328	29.7431	30.8416	21.4306	21.8439	18.5181	18.9561	20.7527	19.3107	23.2277	23.8453	23.4515	24.6871	24.9894	25.1156	29.0417	35.0932	27.5161	26.3023	21.8608	25.9482	24.9383	28.1103	24.6119	27.0095	25.1036	27.0035
evm.TU.chr1.1590	47.4678	51.4394	48.1646	62.1546	71.9388	63.9071	75.2396	48.1566	55.7273	52.6556	61.6503	59.4177	40.1229	44.1097	29.4072	47.391	58.3401	47.4304	35.9701	34.8871	50.031	40.0937	51.5474	43.1602	19.7644	14.5387	7.19507	15.7013	34.563	22.7907
evm.TU.chr6.511	23.4296	21.5032	18.6902	18.7674	19.9404	18.6421	9.38642	10.1978	9.31126	8.93525	10.0499	8.48092	13.6526	15.0758	16.6753	14.3072	10.9281	15.0549	13.4642	14.915	10.9969	13.0789	12.0401	14.4241	16.6047	16.0231	14.0621	14.5481	12.3734	13.28
evm.TU.chr1.107	11.9631	11.98	10.4021	13.0642	14.5305	14.3903	22.0854	19.6144	20.0422	26.7614	26.4074	21.8136	32.8753	37.0061	51.8982	54.4931	49.0315	65.0091	21.4851	16.1509	19.7171	31.1497	37.0788	26.4005	20.948	6.15955	6.71606	17.9984	22.4648	20.982
evm.TU.chr29.25	506.953	514.964	630.003	603.408	454.509	557.498	272.706	283.862	305.486	301.623	167.296	231.942	96.4563	97.5603	91.342	71.0108	68.8836	60.1893	713.563	666.011	791.406	296.012	203.235	250.484	76.2186	304.309	197.193	270.805	144.715	159.575
evm.TU.Contig171_pilon.18	38.8865	35.6599	36.7592	33.4562	30.4309	32.515	19.2547	21.6128	16.8211	18.4536	17.1441	14.1045	43.8529	39.9256	59.6966	45.6329	41.419	54.0042	28.0765	35.3493	39.2539	27.9092	26.7829	23.8843	21.2895	24.0231	20.7046	27.8851	26.855	35.5088
evm.TU.chr37.27	79.1223	81.3587	76.8625	66.9649	67.4661	63.7804	35.7413	33.4675	29.6816	32.8669	34.2959	37.3677	25.8689	24.8638	31.4896	29.0106	27.9575	30.8179	35.9496	43.9629	30.0557	30.5981	26.9088	30.6709	32.6236	44.158	27.602	32.7089	27.6169	29.3362
evm.TU.chr23.140	106.638	106.464	104.095	101.6	99.2921	97.9146	87.0894	88.0738	93.1524	75.4977	101.614	87.3235	87.8206	85.9537	105.744	91.7311	74.7236	98.6703	87.4065	83.1098	78.8476	78.0969	91.7021	72.1019	84.2696	87.233	74.5105	68.382	65.0906	64.9413
evm.TU.chr6.63	13.1755	12.0888	12.1618	17.5949	17.1581	15.154	18.3488	19.3979	14.4976	15.8421	17.7101	17.0575	20.0779	19.7536	17.1451	37.9919	36.0923	28.0188	23.0348	29.7776	23.7423	40.0225	27.6622	45.3513	29.8859	13.8218	17.408	27.8121	25.3544	36.0281
evm.TU.chr5.1299	50.3945	52.7187	50.5376	50.8514	47.8891	52.9827	52.2777	45.151	48.5736	44.1767	37.1309	44.9176	40.8268	37.2414	36.6485	32.5021	34.0652	31.3509	52.4312	55.1786	51.7221	52.7168	39.9779	47.5649	50.6981	39.0369	42.4285	47.605	42.7898	45.2183
evm.TU.chr4.822	32.9688	50.2019	61.2841	37.3346	35.6084	39.6521	272.417	403.046	596.188	27.4414	71.4665	62.1794	79.2217	59.2952	28.4052	20.6339	33.0128	25.6613	211.124	185.834	157.589	35.3311	51.9444	37.8709	277.866	105.295	182.609	74.9992	87.2859	72.0086
evm.TU.chr29.282	39.6151	39.0056	39.3856	38.1982	36.6774	36.5666	26.7499	29.971	25.7312	24.1829	28.1432	27.2182	27.7838	34.321	29.6969	34.6009	33.691	35.7926	29.6371	36.9341	34.6251	27.3799	27.683	26.6041	24.8744	36.2052	31.0326	30.3395	29.5913	32.88
evm.TU.chrZ.788	12.3579	14.8536	12.8812	16.7447	15.6506	17.5031	26.2404	26.8131	24.6843	36.7558	26.2091	32.4084	35.4642	37.3858	44.5839	42.0215	40.1576	39.8438	31.4443	23.9699	32.8309	45.9056	43.9644	38.3624	33.5528	18.6744	29.8406	37.6805	46.7267	38.9089
evm.TU.chr1.2084	18.1978	18.0622	17.0965	19.8629	19.2128	21.4834	23.5208	19.6155	17.0811	17.9236	23.7776	19.6676	28.0564	30.7082	33.9019	20.468	17.6309	23.6781	18.2833	18.8665	20.0106	22.6312	21.6036	23.5355	20.3051	17.1743	18.361	25.6311	24.0403	21.7761
evm.TU.chr16.251	128.173	118.804	134.989	134.853	119.735	125.402	98.4386	105.047	108.968	87.1666	96.2485	86.9983	68.7556	79.3257	94.8074	91.6051	80.8542	77.0164	117.777	115.979	126.588	95.3072	100.277	92.14	113.43	119.725	116.073	110.224	109.285	95.4791
evm.TU.chr18.249	60.9925	55.301	56.7787	50.4035	52.3011	52.901	39.0049	46.5986	41.6356	38.1576	45.5889	43.2595	54.1689	55.8277	60.8125	58.7386	59.2225	56.6138	41.3927	51.3289	42.3053	47.4445	46.1517	54.6553	44.2545	40.4719	38.1094	39.8189	43.5044	32.8865
evm.TU.chr7.578	39.1918	51.2169	39.7757	28.6374	22.9187	38.9195	380.21	507.247	603.886	71.6221	70.4055	49.0122	868.7	1056.87	417.622	102.786	135.334	113.639	359.467	434.227	622.647	110.714	211.233	243.104	3265.52	545.557	4074.74	188.475	219.576	268.486
evm.TU.Contig317_pilon.1	385.851	346.577	433.38	475.562	415.958	423.617	182.057	239.24	233.42	202.568	187.949	215.692	132.95	209.51	144.596	209.343	171.815	182.226	328.342	347.257	451.319	185.813	155.296	174.272	178.049	439.248	296.682	210.358	188.984	213.686
evm.TU.chr1.2223	178.537	192.201	210.662	237.379	244.809	243.274	147.511	133.507	127.301	120.178	168.899	184.038	93.4206	89.6251	78.1951	129.38	133.749	115.337	129.977	112.743	98.3854	125.698	130.68	105.725	124.213	133.608	113.355	98.7119	112.04	95.8542
evm.TU.chr18.478	21.77	22.6203	21.0317	19.7163	24.2363	21.0198	25.1729	22.848	18.9997	21.1983	18.9114	18.4921	21.758	17.7524	20.9775	20.3963	21.693	19.5516	13.8847	12.0343	7.17116	18.5089	19.9562	19.5501	18.0701	8.83084	10.8835	17.4434	13.9456	17.721
evm.TU.chr7.419	3.38616	2.73144	3.01597	4.76981	4.73167	5.15237	18.0581	18.0931	17.9266	20.5166	21.022	15.9961	33.3491	29.9095	34.8785	30.6547	22.1646	40.8015	26.8128	19.7456	37.7906	31.7626	25.5071	19.5674	41.9116	7.19601	7.72685	23.1039	33.7812	31.5009
evm.TU.chr16.475	31.0271	30.7466	30.7094	31.1763	31.9593	30.38	26.8373	30.6019	27.7196	26.5271	28.9471	30.3751	35.6905	33.2789	35.9779	29.9313	31.1964	34.4415	30.1948	27.8641	22.6587	29.5637	28.0271	28.8256	47.4975	37.7121	40.623	39.4118	37.2779	38.7714
evm.TU.chr15.379	14.4665	15.4429	15.1743	13.9993	18.1377	16.5115	17.481	14.8604	15.4563	15.1661	12.2616	15.3641	16.081	20.5854	17.4876	16.0666	14.0111	14.0816	13.4412	13.0486	12.96	13.2361	16.8982	14.0042	18.2879	8.00533	11.6622	11.6984	12.2204	12.8793
evm.TU.chr1.2266	49.2297	49.6221	54.0857	49.408	48.2495	50.9633	33.5908	43.8219	34.4657	30.8341	24.8762	30.7106	29.2612	31.5891	30.3143	26.5825	23.3504	27.2524	46.1663	53.2023	47.6853	32.0605	24.8211	31.0349	26.8533	60.307	52.9218	47.9346	43.5127	46.5422
evm.TU.chr16.185	116.64	104.818	99.0761	71.967	71.4441	80.0905	83.2634	76.9039	81.1254	57.8335	56.1449	58.6107	52.7557	54.5419	56.7433	54.345	57.0171	59.8407	56.5381	75.2278	66.1456	45.0017	54.254	51.4977	44.5856	86.3307	69.4629	54.1477	57.6655	47.4934
evm.TU.chr1.1764	219.31	222.442	213.66	223.002	194.174	189.666	91.2734	104.081	93.17	70.9735	87.113	85.1795	97.3486	90.3969	77.3355	95.1477	93.4561	86.4145	158.256	241.483	173.341	90.5169	65.185	89.8768	185.095	155.272	165.349	112.057	121.824	144.698
evm.TU.chr13.7	86.3338	83.1699	84.8254	76.1312	68.0041	76.3107	49.3069	55.3308	53.3115	45.6479	45.8529	43.8245	44.5819	48.2079	40.0865	46.3265	43.037	46.526	61.4984	68.0806	62.9112	47.1241	41.1783	44.8547	41.7638	69.8275	53.3909	51.9982	53.6125	52.6402
evm.TU.chr14.10	9.72626	10.9799	9.46485	13.5903	14.1934	14.1733	27.9362	28.4546	29.2245	32.8613	34.8844	29.3427	65.3195	51.5567	65.0787	60.9654	57.2828	77.8628	41.0827	33.3943	41.3188	50.7198	55.5287	45.5823	60.1733	18.8273	23.7096	38.3871	44.9899	43.5659
evm.TU.chr6.584	95.5205	104.313	100.362	68.0892	79.4648	79.0693	114.037	121.557	110.803	81.2642	94.4953	98.9549	147.334	140.353	126.584	98.0408	122.762	102.854	80.6823	77.1396	87.1515	87.7084	84.4781	74.3925	152.264	132.265	167.098	116.667	116.402	125.201
evm.TU.chr1.1973	2.3811	3.9338	4.11801	6.73686	7.14764	5.80564	13.3761	15.3487	11.9427	12.0665	7.7295	11.7278	40.2322	38.6544	34.7103	14.8693	11.6102	18.3254	17.5288	19.3886	26.9075	13.8684	9.95322	14.4525	95.9977	11.0442	45.0012	23.471	20.045	19.8889
evm.TU.chr20.162	65.1582	69.8975	66.7192	71.1106	84.6866	79.5867	90.0002	72.5983	77.2783	73.259	70.8679	70.1655	55.7196	44.7503	49.3522	72.5481	76.6752	83.9696	65.5352	40.7351	77.3672	72.9922	94.5063	64.7277	23.8879	8.37434	13.9809	36.7034	47.9853	38.2407
evm.TU.chr6.656	51.7081	54.3517	49.9215	46.7537	50.3833	45.9462	23.8894	27.3763	24.786	27.4482	31.0444	26.959	23.1432	20.7677	23.2326	27.2116	28.195	26.983	23.0641	22.8289	14.646	25.1115	29.6413	25.4379	16.3271	30.9789	18.2149	23.7803	29.0987	27.2595
evm.TU.chr22.219	8.56557	9.52611	10.9923	11.4138	14.1134	12.3831	23.6285	26.1891	18.0323	29.122	26.0801	27.519	23.5269	22.4085	25.3665	32.2271	36.5186	28.074	22.7766	23.1967	28.5647	27.5275	38.9835	31.6938	28.3803	20.2036	19.8496	44.0749	30.2145	33.1558
evm.TU.chrZ.945	38.3705	32.7493	37.6574	45.3805	47.8158	42.3543	43.9646	40.1506	56.0759	51.5007	40.28	51.5536	55.4496	51.7589	59.7117	38.5068	40.4405	47.4224	36.0227	43.5499	32.0743	50.845	48.7422	42.8066	89.3467	27.3785	47.5071	30.098	49.3579	29.7181
evm.TU.chr3.916	0.37109	0.469668	0.28555	0.887475	0.643005	0.504378	10.5799	11.6766	11.0945	45.0116	63.9185	35.985	82.7027	68.0644	65.7467	140.412	170.05	286.013	52.3234	17.0527	54.41	146.572	109.103	66.7478	6.75796	3.47398	4.72543	26.692	60.8132	61.9695
evm.TU.chrZ.7	5.5572	8.05205	5.08641	9.36693	8.60469	7.0748	26.7952	24.2073	26.6994	36.1244	26.2845	31.2828	33.548	38.5486	33.9936	28.6521	27.8708	38.0567	26.3753	21.1127	24.2239	41.4392	41.385	35.8961	30.6657	10.0496	17.2245	29.7333	36.1269	34.6799
evm.TU.chr5.1073	106.515	113.806	122.011	135.088	132.566	131.635	96.0744	100.233	83.0791	78.6796	80.5055	77.8838	86.293	86.0672	87.4829	79.1511	80.2544	79.8488	108.015	94.6224	69.0861	82.6018	83.4363	78.4715	87.2595	118.911	88.9173	115.802	99.88	105.091
evm.TU.chr28.114	8.67767	42.3088	36.6659	6.01835	8.1954	6.5525	30.8882	81.9593	14.366	71.1269	19.2271	81.5728	12.2204	92.3019	31.3503	57.089	47.4509	2.30718	58.9918	67.1035	19.4961	35.6299	45.6567	45.7474	94.2919	14.923	65.5693	133.244	140.928	41.6793
evm.TU.chr1.2631	33.7634	32.264	33.9716	27.7882	29.7271	28.8058	33.3549	40.3941	34.7175	33.3968	32.1292	43.9174	38.4179	32.8399	32.3847	30.3467	31.9321	31.2342	32.2427	33.1804	29.2865	26.8601	29.4322	25.4074	53.2304	61.8308	61.3439	38.0275	56.0658	38.0191
evm.TU.chr16.461	39.3937	46.2025	46.2398	34.1239	37.4652	37.3044	32.8458	35.0895	37.0652	28.0893	28.5398	30.1536	49.3501	46.7023	49.712	40.6137	39.2989	46.3297	43.9769	53.9197	47.3134	40.2429	41.6903	37.8585	48.6685	43.216	42.5345	37.2654	39.7714	43.8992
evm.TU.chr1.1780	77.1936	72.8262	71.2919	65.9928	71.9315	66.8265	30.9474	32.1906	31.596	36.7763	39.9504	36.2777	40.7221	38.4696	41.9042	52.7306	58.3623	52.3906	43.4341	51.0752	39.9855	43.4353	45.6875	49.1403	41.8973	62.5793	36.7284	45.305	47.0639	40.2999
evm.TU.chr15.7	16.7917	18.1734	17.7313	16.8611	15.8235	16.1287	8.95018	8.85404	8.37057	7.69136	8.14658	8.78131	8.48253	9.35835	8.27751	7.8862	7.10456	7.90178	10.4061	12.2305	8.55373	9.07068	7.47194	10.78	8.58918	9.91905	8.8859	10.3735	9.00144	9.72607
evm.TU.chr23.263	198.886	237.106	271.573	126.094	135.679	153.223	75.0063	120.096	104.727	75.8671	92.3942	85.4812	88.2942	132.998	80.6343	108.157	64.3696	90.5592	115.191	180.649	141.294	46.0671	72.5699	69.3591	207.416	155.35	150.68	107.018	113.659	82.9905
evm.TU.chr4.367	18.9157	18.1038	20.1589	25.615	26.3106	25.6109	24.9756	27.7022	24.1009	22.5649	29.3958	23.9673	48.4683	56.2983	54.0151	34.9708	37.061	45.2724	34.6628	31.1771	37.0956	30.4113	30.9751	32.3201	46.448	25.0119	40.7294	37.4727	34.4462	43.2663
evm.TU.chr13.226	79.7507	82.7301	86.8355	72.4544	72.5112	73.7478	66.3041	62.4157	50.0943	74.2287	56.6913	65.6235	41.8014	39.0773	40.3423	39.665	37.1289	48.912	73.8014	79.0874	67.0718	62.6629	48.1178	56.4394	34.5374	98.8216	64.2094	70.3044	80.209	84.3372
evm.TU.chr1.2181	52.3002	49.885	51.6349	55.655	53.1739	55.2144	38.5478	40.1636	42.0293	36.94	37.8682	39.5071	34.7412	36.4304	36.3296	38.6476	34.9407	40.3345	37.2506	39.8005	38.8511	38.8615	33.5754	35.9033	28.2419	44.3837	33.0828	30.0723	33.8575	32.0782
evm.TU.chr5.99	32.0317	30.4952	33.4379	34.0441	35.272	35.5611	31.475	29.6005	26.4605	32.665	35.0657	30.2531	35.2378	33.5626	41.4194	37.7038	38.7724	36.33	28.5199	31.2359	37.542	28.4971	30.421	28.156	33.2598	27.9514	30.9449	34.5438	26.2338	35.6133
evm.TU.chr7.490	57.6868	56.3232	57.2666	57.5714	56.0087	58.4818	29.3841	33.9455	28.0905	27.5382	28.7989	27.9222	39.0029	34.1842	35.1802	32.6265	28.858	37.0104	43.8168	46.9222	38.5921	30.4725	28.6974	30.2642	29.647	52.4389	39.0393	39.8136	31.9808	36.5413
evm.TU.chr25.89	25.6052	23.4761	20.4708	25.9882	28.9567	27.0492	21.7647	20.8829	21.3054	19.4485	19.2738	16.5414	31.3521	29.8906	30.5306	34.1208	31.1362	33.244	33.8387	37.1891	28.2947	34.414	29.6148	37.2878	21.8217	15.3578	17.4171	34.9686	26.8214	29.9503
evm.TU.chr8.103	36.0912	34.8949	39.2688	44.3297	43.0461	39.1513	47.4677	48.8391	68.7802	59.9571	54.3087	54.6389	55.8235	67.8323	42.6416	81.7573	83.137	69.5066	29.0184	36.4155	53.3165	43.3054	37.2307	33.2729	68.8978	31.2877	70.8206	40.6451	34.7193	37.3059
evm.TU.chr9.380	42.5895	39.0261	42.6291	38.5927	33.9147	37.2663	36.8416	37.8672	32.4663	30.4783	36.9656	31.0023	56.5238	65.7981	63.2037	58.4457	47.4073	61.9201	33.9667	37.2468	42.107	32.9353	41.5766	30.2873	55.6658	33.2586	48.7777	27.7791	34.9876	31.636
evm.TU.chr17.364	104.448	115.354	116.089	117.505	125.446	117.475	48.218	52.3149	45.4439	48.6111	50.7408	45.4668	61.8041	51.7931	56.1505	41.4058	46.0618	46.1433	60.8475	69.3562	46.7961	47.1123	38.0861	55.3235	60.7913	87.4538	61.4859	73.4967	52.7509	59.8614
evm.TU.chr9.496	100.103	88.0554	82.8205	139.517	123.751	146.996	161.341	192.038	251.462	243.078	221.588	222.935	236.118	279.91	176.009	323.192	261.746	271.263	222.753	204.913	319.352	237.916	232.682	308.467	376.899	149.246	293.12	225.919	237.435	262.206
evm.TU.chr7.399	76.1663	79.7188	94.4576	70.449	91.032	87.9366	33.3277	44.7774	108.631	15.6349	17.3226	14.5333	32.5095	25.3778	31.2574	22.9672	19.9834	24.6535	65.7698	58.6292	29.6953	47.8812	20.5608	33.2344	956.212	607.975	2245.61	193.373	130.013	324.659
evm.TU.chr11.358	28.0891	26.6803	25.2219	31.7826	31.629	30.7539	22.349	20.0234	21.3228	27.953	28.8016	24.2405	14.7927	17.2003	17.2604	22.8025	21.4902	22.3655	16.7364	16.634	12.9715	15.0056	16.5537	15.9846	16.3591	16.1845	15.9475	16.4664	14.2542	14.8923
evm.TU.chr14.512	23.1897	23.9027	22.228	23.9797	23.2906	22.6121	21.4208	18.6683	18.2651	17.7047	19.5061	18.3724	25.2358	23.9051	23.8795	24.7989	25.3912	27.0802	19.0231	19.9391	17.4771	19.7983	22.1783	19.863	21.617	20.3422	17.6527	20.1397	19.941	20.1766
evm.TU.chr10.63	70.8318	70.975	71.6304	71.3597	63.8223	70.0273	98.1061	106.086	89.2991	68.2883	121.126	93.4394	130.764	159.22	159.173	81.4943	84.4512	114.281	66.6468	63.4165	69.0403	66.8654	68.4345	62.4988	158.31	103.461	196.605	139.724	84.2628	124.631
evm.TU.chr1.1793	623.537	564.95	575.567	603.594	589.172	624.39	445.662	428.854	440.709	512.866	402.994	430.231	374.867	360.456	358.766	450.043	429.075	421.565	710.94	706.562	745.562	635.248	537.787	635.023	540.833	433.924	419.915	452.761	451.634	434.026
evm.TU.chr27.168	77.7134	67.0136	48.8598	60.7703	62.5635	56.1061	103.595	93.3171	81.3322	81.4319	67.2777	90.2119	106.642	128.976	143.311	115.193	242.168	168.143	94.1007	75.9102	75.5147	122.887	93.1794	144.308	149.609	90.8872	118.275	130.631	116.389	108.158
evm.TU.chr1.2761	17.059	18.7451	18.5838	28.381	29.8337	30.0244	18.595	14.5812	15.9877	22.1473	21.6788	23.6848	20.7532	25.7154	32.0782	31.9235	27.9722	26.0182	14.7539	9.53914	16.5305	20.9678	23.0707	18.7455	4.21873	6.09363	3.47694	12.0423	12.822	12.7955
evm.TU.chr3.109	68.7738	71.4726	61.6518	73.695	64.1972	63.7335	44.8513	38.3455	40.2132	36.1046	41.7249	33.0711	32.6625	30.8991	39.0352	39.6205	36.7221	40.9826	61.0603	67.6345	53.2952	42.6301	43.1464	39.8414	42.7034	42.5989	29.1606	44.1742	45.7654	42.073
evm.TU.chrZ.1011	147.459	136.979	174.369	165.835	136.092	137.934	91.0341	119.821	201.25	191.089	77.4323	171.168	173.345	188.765	158.044	86.5875	74.7306	87.5928	174.978	186.317	199.796	183.547	147.325	86.5711	157.725	148.893	138.635	127.166	214.836	106.677
evm.TU.chr14.211	32.9928	30.7156	31.184	37.3014	37.1425	35.0491	22.143	24.0104	21.1255	21.4729	27.8427	24.247	24.617	24.6684	26.5601	28.1337	25.5173	27.4418	27.5268	26.245	20.9639	25.1208	26.7373	26.6314	27.7232	24.8194	23.1767	25.5837	24.2753	24.305
evm.TU.chr25.53	188.23	192.135	199.765	174.281	183.308	186.843	156.634	159.471	142.633	133.479	133.976	158.097	148.736	129.185	135.731	137.17	132.828	123.252	158.564	153.016	110.01	132.574	145.936	135.829	172.535	186.758	180.929	169.439	168.634	170.398
evm.TU.chr18.264	24.6094	23.9998	24.29	21.2289	23.5171	22.8393	22.7305	21.3764	24.1398	17.5403	23.4741	22.9624	23.8684	20.2841	25.0455	23.6485	23.5845	24.581	18.0536	18.131	14.1041	20.2378	22.4722	21.1827	27.532	40.0631	29.165	24.7377	25.9422	25.6834
evm.TU.chr1.83	49.6223	42.5913	34.0953	39.297	41.0314	41.0851	27.2326	26.2411	26.7042	28.6711	26.4231	24.7269	24.1477	30.6302	31.0295	28.4091	22.7821	26.5503	27.5577	27.3336	25.1387	25.0027	26.6525	25.2055	25.8745	52.9012	33.5948	33.7321	29.3943	35.7199
evm.TU.chr3.781	14.5846	11.4856	11.1515	12.0606	15.3147	11.8123	68.2245	59.7504	58.9154	120.73	90.9058	110.758	27.0969	29.0892	20.9811	26.3324	41.059	29.7414	39.7089	21.4487	21.8879	68.1219	81.5541	67.4476	49.9269	15.6356	33.9916	64.2009	35.266	55.8362
evm.TU.chr18.323	26.585	24.6243	24.253	26.037	25.1549	23.3326	31.9855	33.7639	31.3574	33.0806	27.466	31.5423	48.5348	56.8763	55.3916	44.2473	43.0674	46.048	34.188	31.5838	33.9324	33.8293	39.9593	36.2356	39.0776	25.5103	36.1219	44.8099	38.9031	47.9204
evm.TU.chr11.360	80.9967	76.9578	88.4982	59.9906	60.5688	59.8717	63.8266	101.747	109.74	121.965	171.133	138.191	31.1331	30.5519	33.9386	44.6151	51.8857	38.9468	45.6404	47.6367	41.1207	39.0409	40.4044	40.4564	37.4349	60.5377	51.9278	40.8569	44.1312	34.1885
evm.TU.chr29.122	111.745	111.95	105.489	103.33	104.955	99.5737	86.7267	82.8776	89.7619	83.6107	66.6694	70.6045	64.1474	67.5392	69.122	59.7419	60.4113	74.5043	103.159	113.25	99.2446	80.4516	73.9942	79.039	74.622	73.2858	68.2861	75.4411	72.8175	75.1343
evm.TU.chr12.311	41.8022	42.1942	46.3651	31.353	34.0026	35.6915	22.7198	24.385	24.6084	22.6344	20.5778	22.0297	21.8259	21.73	20.0904	18.9273	23.3583	19.804	20.7845	21.826	15.6939	19.8322	19.6327	19.988	22.4146	29.0664	19.4404	18.5171	17.5337	19.449
evm.TU.chr8.387	31.0069	41.4429	39.4345	29.6804	29.6348	27.7294	36.0888	26.9959	37.1627	33.8507	24.0964	23.5547	26.9177	14.4555	23.4503	25.6811	24.0297	26.0843	27.8867	19.0722	26.246	45.244	41.1633	33.9217	31.4655	14.3853	25.1715	34.0905	25.3943	25.6913
evm.TU.chr20.332	51.2074	49.0831	38.3918	46.7974	44.4282	43.9845	31.9003	23.0551	21.4663	23.1529	34.6538	29.7834	18.418	24.1432	22.4289	21.6507	22.0774	23.4901	21.3808	30.4583	16.3412	17.0172	21.4472	18.6937	14.0156	40.4074	20.06	25.4656	34.4531	26.7918
evm.TU.chr1.2502	27.7907	27.4402	28.6509	24.2575	23.543	23.0913	13.5586	13.7047	12.164	13.0698	12.6403	11.1169	17.1228	17.5518	17.7664	16.7454	17.1216	16.2416	18.2022	20.6276	16.37	14.9013	16.7418	15.5233	14.4386	22.9174	17.3157	16.451	18.6217	13.852
evm.TU.chr1.39	102.914	97.4271	95.0992	84.1822	65.8668	87.6573	39.2551	32.9745	36.1894	29.8404	24.2143	29.747	18.5483	17.0148	16.5977	23.1806	21.8689	17.1495	70.2449	74.2656	52.8147	36.0929	30.32	26.4699	15.0943	38.4717	20.4062	23.8376	24.0571	19.3433
evm.TU.chr21.163	18.0795	18.783	17.4779	20.692	21.6118	20.2169	20.4404	23.1613	24.8782	21.1466	21.8665	19.5346	22.005	23.8657	23.7065	37.7975	29.5437	23.0929	19.3353	19.9531	18.3869	22.2672	25.3164	20.3225	23.7713	12.178	16.97	17.3989	18.3405	19.5166
evm.TU.chr5.454	74.1266	75.7146	76.1737	60.2048	63.5105	69.5374	51.1825	44.1184	46.7786	44.3872	37.8236	49.9411	51.4846	51.5671	60.8415	59.0529	51.272	47.7876	30.6526	39.2844	37.1028	29.5406	43.6866	38.4887	39.4133	34.2857	31.1025	35.1311	35.5447	29.1226
evm.TU.chr5.843	96.3651	100.206	107.915	92.3965	97.8764	89.7212	60.9914	61.635	58.1404	51.0211	57.4196	53.9017	63.4222	60.9831	59.4061	63.2602	65.685	61.9086	64.8161	67.6668	53.7158	54.8494	51.2414	57.973	44.0335	65.3445	51.8616	57.0651	55.2667	58.5024
evm.TU.chr15.184	119.002	128.881	122.879	68.607	78.9505	78.1349	57.4579	60.7756	40.1636	50.1863	77.4183	77.6011	26.191	23.2154	28.097	40.7925	34.0189	43.9388	70.0474	92.1044	43.1678	60.3717	48.2427	47.4772	19.1828	274.995	106.561	111.417	119.837	105.501
evm.TU.chr29.113	326.727	440.404	519.176	124.334	193.742	177.565	275.94	218.898	123.709	67.1168	78.84	151.337	1.62613	0.981756	0.496479	0.358447	0.721488	0.336296	19.7543	31.4979	3.92858	0.343864	1.91958	0.648012	0.0311438	178.577	58.2146	44.7683	76.7106	46.3078
evm.TU.chr20.170	19.3841	23.2905	20.8244	18.8545	19.3855	16.6928	26.3535	24.9805	32.712	19.0452	24.945	17.6219	45.6192	38.8667	40.4977	30.3555	26.4044	34.4859	38.8758	33.3241	43.0671	30.1004	32.1124	32.0503	66.0011	22.3255	38.4755	29.3392	32.652	34.0651
evm.TU.chr26.82	93.1041	76.5777	77.6801	73.715	70.1426	71.9502	252.964	343.06	356.052	298.575	293.262	318.956	527.527	568.308	452.134	365.133	408.159	424.472	257.474	267.692	434.077	289.153	242.235	320.743	782.711	192.525	375.334	278.515	258.927	339.174
evm.TU.chr1.2470	16.5918	14.1308	13.1917	24.7607	24.3222	21.4571	26.5153	24.6603	22.5068	22.3448	41.9523	28.2456	36.2328	30.8157	38.4118	34.7649	31.2026	33.4374	21.1092	20.478	18.9112	26.1291	30.2005	24.4489	34.5359	19.345	20.6691	21.4326	21.2798	23.3645
evm.TU.chrZ.855	46.5501	47.9734	44.773	45.0588	48.8749	47.001	46.334	41.9759	40.0909	45.2025	33.5488	41.5686	46.8979	48.8647	47.9382	39.5499	39.403	43.0425	50.9912	54.0655	51.3123	50.0231	45.0469	43.8302	44.185	63.8997	51.1703	52.2986	63.7526	49.1073
evm.TU.chr10.292	41.6734	62.2097	39.8008	79.2649	80.0185	87.2455	104.775	90.1395	116.347	116.858	267.718	199.878	42.0352	29.8346	44.604	41.5038	41.6488	51.7438	27.2633	41.5961	21.0482	43.3227	41.0395	39.5276	32.4152	116.549	71.9347	93.2073	69.2021	105.7
evm.TU.chr28.178	37.1437	39.9905	41.7089	44.0321	53.1151	54.8128	78.225	55.677	69.0468	73.1291	58.0701	69.235	49.8392	40.7679	42.8983	38.9426	51.0651	40.1264	61.3401	56.0094	59.7209	66.6129	70.0293	77.5989	34.2392	21.2663	27.0233	41.9923	34.7788	33.0223
evm.TU.chr12.57	40.9104	47.1023	42.2762	59.35	59.7215	58.8741	78.5076	49.0738	62.019	83.9463	63.8058	74.2414	31.199	38.1484	39.6715	45.8045	47.6756	44.0583	52.4452	45.9501	44.7907	67.0884	44.8292	62.4243	48.5602	27.9458	43.6597	45.574	34.3773	37.9327
evm.TU.chr10.8	20.9635	18.5641	18.4746	26.7951	26.2138	26.5501	27.3205	25.1096	22.6537	32.6811	26.5875	26.3106	36.1341	29.3875	35.7182	29.5561	27.1224	32.4302	29.203	32.0015	28.3995	31.5965	28.9927	31.0663	38.2525	22.1902	31.8984	29.4646	31.9972	27.906
evm.TU.Contig961_pilon.3	418.304	371.487	238.528	373.051	253.71	285.83	202.375	252.118	175.61	149.474	229	106.12	171.293	257.922	116.915	186.234	191.185	163.27	326.347	268.393	307.747	175.68	114.496	178.853	190.445	456.056	338.518	322.522	238.384	285.123
evm.TU.chr1.929	45.9632	45.0952	42.453	29.432	32.616	31.7851	16.2961	15.4785	13.2271	14.6583	16.3289	16.9393	13.7388	15.1714	16.5361	11.5427	12.3484	11.8371	16.2221	21.6037	9.7986	12.4608	13.0199	14.5449	18.3599	30.0818	20.0892	27.801	18.0707	18.5274
evm.TU.chr3.859	15.9037	17.1934	15.3283	12.5184	13.4468	14.0826	16.6176	15.9212	15.7291	20.5901	19.7296	18.145	33.8674	37.8427	43.5084	59.5709	57.8669	48.5851	31.6116	23.6186	31.0094	41.0744	47.2557	44.1762	35.1169	14.8268	32.3694	24.4646	29.807	26.0156
evm.TU.chr26.107	24.9257	24.7612	23.1997	25.449	26.6915	23.7254	24.7272	32.9771	27.6399	31.7949	34.2425	32.8065	31.6798	35.0638	37.0914	38.8786	37.0525	35.8141	25.5577	27.4849	26.1267	26.5498	29.1731	26.4277	37.6157	36.4363	38.3782	30.5498	35.0749	27.048
evm.TU.chrZ.308	19.4365	18.1325	17.5587	17.0216	16.7474	16.6794	22.9096	18.6587	18.1182	19.0408	19.1563	18.2588	23.3569	23.1565	25.2389	24.0005	21.4522	29.9519	18.6844	15.9391	15.5792	21.2883	21.6937	20.037	16.0644	14.3656	11.7913	17.8763	23.3885	15.6905
evm.TU.chr2.823	35.4202	35.5658	38.5355	40.9354	37.1145	37.6816	24.5131	28.2818	26.0029	24.3787	23.6443	23.3129	22.363	29.1565	24.6711	29.0177	26.0576	27.8804	35.815	36.4885	45.4411	27.7607	26.4276	26.2309	21.8208	34.7083	28.76	29.1029	28.0814	26.1406
evm.TU.chr26.47	100.069	100.746	97.4349	82.5091	88.8652	82.7653	53.9059	59.4307	52.3744	44.8299	53.3601	45.0371	50.8831	46.0391	49.9944	53.2631	57.1761	49.2336	58.9388	74.0783	50.366	45.0143	46.4943	49.8021	49.6953	84.8038	64.752	54.3791	51.6334	46.0664
evm.TU.chr3.700	65.9292	66.0071	63.3784	51.8623	51.8281	55.8952	25.2229	25.8185	19.9342	19.184	17.68	19.0465	26.7593	23.978	23.3193	23.524	22.0333	25.5287	37.23	48.7499	33.1971	24.7816	21.6125	23.2587	22.5904	40.8754	29.1877	29.0123	28.3014	32.4881
evm.TU.chr19.314	152.693	132.171	114.102	78.3208	89.5412	113.087	60.7834	23.9345	36.3055	10.6272	23.6896	23.2551	8.49951	7.52082	3.87005	3.64327	5.39888	6.02357	15.7809	22.9082	5.4041	3.66485	11.958	6.77541	0.153788	135.215	53.8112	50.5637	44.1445	36.7982
evm.TU.chr7.219	63.9107	56.2396	58.0669	81.1948	65.7677	72.5089	51.5049	46.1275	49.6862	56.6974	51.6867	55.1414	50.1483	45.9341	50.9451	61.4794	52.0837	59.8296	72.1578	73.4993	83.5373	60.3201	56.3492	57.3712	54.6907	39.7876	44.7864	45.1928	54.3264	51.3003
evm.TU.chr15.80	198.606	199.116	207.593	211.086	218.419	208.366	139.233	123.429	116.408	125.854	129.05	117.252	118.256	117.171	123.588	127.539	120.724	135.004	150.195	155.869	144.794	128.357	129.856	135.632	117.222	250.868	176.155	185.757	178.871	165.015
evm.TU.chr1.1439	64.275	86.8858	72.657	90.6258	84.1408	90.7584	37.4706	25.3497	30.9813	36.5353	34.4478	35.3493	23.6468	21.897	23.0557	29.6096	25.17	27.3785	39.885	45.2426	34.4665	27.0855	29.2784	26.6821	19.2099	36.2919	20.3163	25.4593	30.6013	26.8058
evm.TU.chr3.902	33.12	31.6637	30.6969	30.187	30.3642	28.6586	17.0813	14.8108	15.1545	16.0642	17.7615	15.8745	16.1678	16.1849	18.4139	18.3241	19.0371	20.1833	17.4651	20.5277	16.0026	15.8621	18.232	17.5638	13.4154	19.4816	13.4713	14.844	14.699	12.2765
evm.TU.chr20.260	40.0075	44.8966	44.1706	44.063	44.808	42.109	43.9158	39.4644	31.8282	23.2873	25.8481	34.2673	19.675	20.4899	19.6788	21.5752	22.1781	22.8077	25.9672	28.1682	18.9969	19.4192	18.279	23.4516	18.5311	76.0328	49.7802	52.957	60.2167	39.563
evm.TU.chr29.152	264.39	285.016	248.51	266.868	243.923	282.468	151.396	201.559	168.501	187.654	153.645	173.29	133.015	161.671	131.068	165.224	160.172	154.388	201.528	276.466	268.98	159.365	131.066	156.69	126.584	250.206	216.094	193.12	169.138	170.668
evm.TU.chr2.1035	516.67	707.271	592.53	262.234	339.975	349.142	784.761	869.033	814.878	709.456	814.712	881.697	243.104	381.624	188.688	85.2336	169.495	207.742	124.255	118.762	114.588	152.467	160.871	157.82	404.038	1712.45	585.42	321.459	732.352	464.45
evm.TU.chr15.294	127.168	137.12	128.22	119.342	117.531	122.404	96.057	122.14	95.1582	96.2854	102.464	99.2557	86.1408	98.1954	89.2242	109.651	113.824	100.139	111.77	132.535	129.767	95.4904	81.6947	100.379	94.3479	106.135	104.114	122.212	105.455	107.071
evm.TU.chr5.793	23.6015	24.0682	22.2079	21.1137	21.7166	21.271	14.9456	13.497	12.6844	13.9847	12.6422	12.9703	13.2653	12.6192	15.7492	13.2531	13.7739	14.8799	18.6926	18.8678	13.8403	15.6308	16.4018	14.8599	10.5825	14.7961	10.8803	12.4738	12.586	11.264
evm.TU.chr1.2517	32.1636	29.3231	32.4519	28.2238	29.2633	27.305	36.5207	36.1916	35.0191	43.5425	37.0966	41.7322	65.2853	68.3571	72.495	58.3258	52.457	74.4265	44.4034	37.0413	43.7817	46.0274	44.1676	38.6949	49.5936	47.9531	34.397	48.2519	47.667	45.979
evm.TU.chr3.1137	56.3353	59.0773	49.7826	44.6262	55.2375	48.1301	40.9568	39.954	47.2465	35.1258	31.4376	34.8489	42.6464	37.7799	44.1981	46.84	38.6404	40.0591	53.2546	59.2281	58.5363	51.351	46.0312	50.3302	52.5285	51.4383	51.3189	53.8073	57.052	54.2254
evm.TU.chr23.305	53.7484	56.4877	58.3667	54.2255	57.692	58.436	37.2719	41.1889	36.5004	35.7566	40.9854	39.7023	51.475	48.7731	47.0482	41.6003	48.087	44.978	37.6774	35.0564	25.2464	38.3266	44.0185	41.2577	48.2459	48.5556	43.6235	47.5324	38.5534	46.9338
evm.TU.chr1.2696	10.5831	11.0477	11.4093	10.07	10.9243	9.80292	16.49	18.0699	19.1704	14.6319	17.5785	15.695	21.8966	21.1327	25.2031	22.0359	19.9044	19.9321	14.9314	14.1467	17.9042	14.408	16.2909	13.7945	18.8798	16.5719	20.4916	15.7667	17.3331	17.693
evm.TU.chr17.203	57.2598	59.2736	58.5047	56.4352	53.4587	55.5327	40.114	43.9988	36.3161	37.9595	33.1724	36.7677	36.6737	38.6025	33.6645	40.3803	35.096	39.1519	53.4863	66.1342	64.502	37.9617	34.0871	36.9267	37.6292	49.8172	48.0833	45.9686	50.7562	51.5828
evm.TU.chr4.540	32.4075	34.6291	30.5942	28.4036	30.8101	32.8468	17.466	19.3124	8.66283	17.813	22.7144	20.9692	10.584	10.571	10.7791	15.8795	17.1519	14.9305	13.8172	20.8086	5.94792	9.3295	13.1104	11.4627	5.17046	43.613	19.8829	28.1611	23.8463	21.9364
evm.TU.chr12.545	27.7154	28.9155	27.9967	26.5501	27.282	25.7296	21.3797	30.0699	19.839	20.3122	19.5966	20.2941	37.0231	34.4556	46.5638	28.3435	27.0888	36.3092	27.5845	34.1057	22.7764	29.977	20.6836	26.4659	27.4766	50.7672	37.6936	56.6203	46.7911	49.115
evm.TU.chr1.1833	22.5436	22.6618	22.0934	19.7547	20.466	20.4684	15.6535	16.646	15.7376	15.0842	14.3594	14.0887	15.2372	15.6054	16.4738	16.7444	15.2294	18.3604	18.1945	19.0916	15.7691	15.2085	16.0224	14.9278	14.376	18.9764	15.4661	15.9524	17.1442	15.9688
evm.TU.chr10.207	90.5488	88.8617	87.3623	80.8403	91.677	93.4414	52.1302	42.8861	37.0534	42.4227	47.9646	61.0026	20.9147	21.0588	21.1952	24.1614	27.8672	26.4038	31.0048	35.973	24.9109	24.2946	34.1058	31.7921	15.4294	63.6457	28.7775	36.1206	39.9161	34.8718
evm.TU.chr25.13	272.124	257.367	288.066	267.313	264.297	277.529	112.9	118.97	121.48	108.796	117.326	121.757	104.168	103.223	95.1016	104.975	92.4181	121.281	187.96	171.913	143.555	119.641	113.319	121.163	108.254	169.897	119.675	145.403	134.639	149.132
evm.TU.chr30.170	160.308	146.732	157.688	148.805	140	151.881	151.389	201.39	204.704	124.692	148.019	137.632	139.801	142.768	131.385	134.463	148.547	125.305	129.697	142.031	140.738	112.2	107.154	127.396	179.093	163.785	168.869	118.287	116.744	126.845
evm.TU.chr16.329	17.9172	19.8034	16.2505	22.8863	21.2353	21.3988	32.2124	28.5056	33.5103	54.8427	46.4225	37.0014	32.844	35.9889	39.8406	62.7571	57.8987	77.906	37.7795	26.8892	48.9829	45.9692	55.3636	38.7208	28.358	10.9262	17.4519	32.937	49.8564	50.127
evm.TU.chr3.60	44.9161	41.1078	37.4991	29.8582	44.1444	40.8486	42.1411	46.0316	55.2846	34.3854	36.4561	34.5863	50.907	40.1716	55.2385	31.997	32.1794	33.767	49.7868	52.4147	44.1451	32.5883	32.9524	31.2569	87.891	46.7103	85.6061	51.5112	38.0018	35.8153
evm.TU.chr7.20	99.9391	94.5699	104.044	116.978	113.835	102.378	62.2752	73.1828	71.7068	59.3451	74.3761	67.0497	76.2612	109.976	97.4051	111.833	103.475	98.6253	73.2217	83.3759	80.2116	72.1175	83.8205	73.2687	71.4859	80.102	76.0488	78.7643	73.6053	68.2724
evm.TU.chr26.253	21.2208	20.6865	20.3224	22.6261	24.0566	17.9688	25.9211	26.2961	21.4527	21.8566	24.574	25.072	30.88	33.8676	36.9078	34.9609	36.7599	34.048	20.076	17.168	15.1065	23.1242	27.96	26.8636	25.8021	12.5878	15.2434	16.1502	17.8706	15.4059
evm.TU.chr26.31	45.7918	41.89	50.0924	47.0519	47.7004	50.4772	58.2299	75.0684	73.0932	56.6987	74.4501	70.0094	90.9224	85.6863	87.1309	66.9115	78.2526	72.468	62.9415	58.5339	59.0121	57.2215	68.5811	62.151	118.252	72.4156	96.5332	76.0858	80.195	85.6079
evm.TU.chr26.4	217.997	197.472	233.921	227.469	199.871	207.788	117.773	146.267	136.525	106.304	96.6006	98.7843	126.03	131.223	117.718	126.494	109.358	137.538	241.554	253.666	284.843	138.301	121.293	122.723	117.54	200.485	149.09	137.898	145.483	141.181
evm.TU.chr1.2690	50.7955	47.1925	52.8586	47.7577	51.9374	44.2931	24.7907	29.2568	28.8882	22.2603	21.7495	20.5242	26.1761	27.042	26.939	28.8025	25.1028	27.8269	36.9202	40.4452	39.5998	27.1391	24.6378	27.4329	31.3526	31.8493	31.8962	25.3209	29.038	27.7335
evm.TU.chr18.223	23.4231	27.9945	30.6259	20.7658	22.1654	21.9912	25.9429	25.3772	21.4513	20.6792	23.8793	20.1758	41.2294	37.5377	41.3206	32.8101	33.2819	29.2539	18.5794	20.3302	11.7189	17.8616	26.8785	23.5478	40.6264	20.573	28.8673	19.6472	17.7306	17.7492
evm.TU.chr1.1949	25.6303	24.9472	22.268	23.5699	23.9878	22.1246	25.8175	40.713	35.9858	22.8273	26.0758	29.7753	61.6242	56.3257	46.8796	40.0538	39.6095	32.375	35.7761	29.9716	25.4884	30.6357	37.9025	34.1121	74.2326	57.826	67.3433	43.2853	45.8231	38.2411
evm.TU.chr3.674	82.4388	90.0374	96.4087	97.3471	101.121	91.6333	102.987	96.0061	92.9459	113.219	97.5121	114.063	39.1117	50.8363	40.8955	59.9281	68.0611	45.7801	73.2329	60.5142	63.3058	62.268	68.0646	87.7125	116.154	63.901	111.742	72.254	66.6729	65.0679
evm.TU.Contig603_pilon.1	68.8217	63.9324	60.4953	46.6841	53.2912	54.7667	47.6571	43.5957	40.4171	44.2363	35.0939	43.9606	43.189	38.1251	37.3971	40.5867	48.0873	50.384	65.5208	70.0187	66.5824	57.1094	46.7242	51.2915	38.4044	50.0279	44.6186	44.6362	47.829	40.26
evm.TU.chr1.1367	49.6373	52.7305	48.0051	41.1199	41.7578	42.5733	12.0101	8.73502	5.73659	7.33507	9.11295	10.9346	4.71334	3.99707	6.00072	4.67777	6.04441	4.25493	12.9733	18.0896	5.75384	7.34551	8.53173	7.9199	5.89114	52.5501	24.7645	25.9079	21.5386	16.6706
evm.TU.chr4.1052	198.872	194.778	204.849	218.453	193.921	214.091	124.552	142.911	145.467	110.772	106.799	99.7682	86.5657	102.857	97.1301	105.885	94.9335	92.4034	152.771	154.239	154.845	104.236	104.913	110.136	124.098	123.687	123.526	104.682	93.5117	93.0907
evm.TU.chr15.500	9.59051	8.61503	11.1459	16.2155	26.2012	22.1965	92.807	93.3226	99.2263	162.211	129.034	105.499	205.813	263.51	236.662	274.623	180.598	299.403	114.777	70.5551	180.1	145.917	182.635	118.473	96.0329	12.9332	19.0984	101.297	158.598	172.475
evm.TU.chr4.178	69.7485	64.8431	68.4128	68.8128	65.6769	64.6306	66.0654	56.4654	52.9949	64.5028	56.0818	61.2061	56.6881	48.3356	55.7668	65.1996	59.5567	49.4408	54.6391	63.8548	62.7142	54.7345	51.4306	57.268	53.1699	85.2206	68.8335	67.516	68.3485	63.5574
evm.TU.chr4.627	32.088	34.0262	34.9093	54.085	55.4453	58.6556	33.4206	32.3383	36.3961	30.1745	30.2603	29.0422	29.4597	25.5449	18.7609	27.6765	38.939	21.5997	30.9939	25.6837	27.5715	24.0382	19.2778	20.7808	68.3959	21.9987	65.7146	17.3592	16.9956	21.6536
evm.TU.chr15.205	25.3954	24.6785	23.3731	31.3859	30.4197	29.7094	24.2178	26.7274	28.6147	22.5192	20.5141	21.9329	28.1126	29.1418	25.6859	27.9325	27.3949	26.8491	24.3604	25.8025	22.4809	25.5683	25.7127	25.4482	27.7139	18.4955	23.9011	25.9103	23.0633	24.8981
evm.TU.chr4.476	25.3815	25.1006	25.7792	26.7023	26.8896	26.6582	14.1906	11.617	12.536	15.5656	11.6286	12.4762	10.6002	9.28291	8.99023	10.0781	11.598	9.55953	17.6665	18.9369	17.4538	13.7257	13.9418	14.5249	9.81579	15.3139	10.6111	12.4351	11.5873	11.4669
evm.TU.chr9.216	70.2482	76.1992	82.9775	72.6628	74.0203	73.1557	59.0674	57.8712	57.0107	53.5679	59.0505	60.1728	57.816	51.7666	51.9694	52.3994	47.1426	44.3682	54.7989	59.22	52.8991	44.4585	48.0774	48.2859	63.5326	76.0666	71.1743	67.6863	61.4557	64.3454
evm.TU.chr18.322	190.095	223.395	211.142	217.685	210.951	215.436	194.616	213.918	201.419	219.541	194.493	199.158	194.395	195.426	181.139	214.725	210.046	197.414	267.713	220.954	209.186	256.123	239.795	257.733	200.931	179.515	180.897	226.527	220.388	215.446
evm.TU.chr5.585	27.7951	41.8937	37.3641	64.2585	58.9302	59.062	56.8325	71.8285	60.9749	67.1487	37.1262	58.1142	47.1523	68.8732	40.8247	45.8815	41.7468	38.1174	64.5385	53.8612	79.8914	90.1423	58.2568	109.971	103.042	21.9562	66.3453	91.0301	85.875	108.198
evm.TU.chr5.255	41.3124	38.4622	35.2153	38.4087	38.749	35.4475	21.7801	22.7846	16.3719	19.5105	20.4595	21.1699	21.44	19.8022	22.8095	23.7717	22.6167	23.1147	26.3842	33.8493	16.5726	21.6653	21.7037	25.5355	17.1879	41.3069	24.7812	31.142	26.4649	26.6474
evm.TU.chr24.98	54.1245	66.8889	66.4795	48.9886	52.5512	46.456	41.1892	40.2046	35.823	32.754	23.9525	29.4179	25.9475	25.2133	26.8374	28.0024	22.0634	21.2422	32.9864	37.0151	41.7328	35.0631	26.1031	29.0775	26.294	59.3337	29.8916	31.8637	32.7252	23.8068
evm.TU.chr6.334	31.5054	30.0251	30.8461	32.5731	33.8394	32.9631	20.9857	25.8648	22.3792	17.9777	17.0514	17.1231	26.352	22.8813	25.0939	21.7098	19.5661	23.6044	22.0397	20.5714	18.4318	18.5826	17.275	20.0074	33.1348	23.3129	27.1281	23.6637	16.9736	22.558
evm.TU.chr9.302	15.4159	12.2827	11.531	16.1108	17.1854	16.2675	26.8671	30.2062	28.4032	25.041	26.2657	24.8603	45.2897	45.515	53.5046	39.5615	39.1074	40.3971	32.4494	29.6394	30.372	38.8544	37.1682	34.9024	51.9275	14.114	32.8719	30.8958	32.0129	26.9312
evm.TU.chr29.68	231.349	241.432	262.263	197.881	185.472	209.209	127.07	127.884	121.42	97.6342	87.0633	94.6847	84.7861	89.9553	88.972	77.1657	79.47	80.8315	127.21	155.249	115.429	86.8272	80.0237	81.321	84.0138	127.636	109.224	110.742	89.9678	101.402
evm.TU.chr1.1475	18.725	15.8574	16.0566	17.7494	15.2092	17.603	18.8152	20.7494	18.3295	16.6987	16.9398	14.8888	23.2298	25.8579	26.7465	20.4886	18.7192	21.2099	21.4698	19.0501	23.8614	27.5004	23.7218	19.9394	26.4852	33.4861	27.6753	28.4455	30.7277	27.2552
evm.TU.chr23.15	66.9343	73.6275	73.1277	65.0987	70.9991	71.2194	47.6231	41.4609	41.1689	40.2144	51.5588	49.9161	46.1219	44.3734	44.8821	41.9753	37.7684	48.4052	40.6813	40.864	33.6096	37.8082	39.9816	37.9316	46.7166	50.1472	38.5973	38.7636	36.3221	41.8302
evm.TU.chr7.528	19.1161	19.0785	20.1448	21.0179	20.075	19.8365	13.9674	14.5626	12.6532	13.119	13.8969	13.7778	15.422	13.9539	16.5773	15.7475	13.9602	15.8386	15.631	17.2324	15.1167	14.4844	14.1128	14.5718	15.3904	16.7921	17.487	17.147	15.3227	15.6044
evm.TU.chr19.419	5.31755	4.56375	4.84	8.33591	9.46697	9.0045	9.30884	9.09253	9.20214	11.739	14.5136	9.29554	39.0186	23.7613	43.7403	34.8196	27.6939	68.7547	14.4008	11.0115	21.9562	23.1749	19.7877	11.3144	5.47518	2.22901	1.26416	22.6414	19.601	23.4124
evm.TU.chr17.236	15.3522	13.9816	15.2516	17.8659	18.8437	17.2278	16.5634	16.6296	14.0625	14.938	17.4638	16.4154	22.041	19.0235	20.7785	19.6897	18.8854	20.1377	18.2622	17.9633	15.9957	18.0846	19.3997	17.9083	26.6683	25.0628	21.6694	22.2039	21.0274	19.402
evm.TU.chr6.129	112.638	129.57	84.1577	119.113	116.028	134.087	57.7008	68.0764	56.6859	63.9602	100.83	65.7671	51.2436	66.9694	51.5918	78.6214	92.135	77.367	42.8581	49.5069	57.8596	54.277	74.409	65.9863	28.4668	42.6013	32.5731	31.4441	33.8075	43.4542
evm.TU.chr3.910	67.5272	68.2902	74.4688	95.9804	65.5392	82.8278	60.3946	68.5595	64.9046	69.0924	59.7494	51.1678	56.307	73.2508	56.9911	71.2887	58.2559	59.3253	79.413	76.648	88.9709	70.5852	57.4155	64.3002	65.8993	70.5226	70.964	69.9451	70.5939	74.4539
evm.TU.chr1.910	64.7767	73.2219	78.3926	64.438	72.531	73.5438	47.6948	71.8022	61.7583	39.7445	40.1278	42.0015	56.1114	55.8412	50.7868	48.2912	47.8587	50.1985	63.3463	63.6582	59.9888	43.9565	41.6147	44.5134	58.4112	92.2479	78.5748	61.7265	52.8013	70.5952
evm.TU.chr5.1049	59.0011	61.9858	59.726	64.3351	64.1047	60.5861	48.6194	54.4142	43.9995	42.7927	41.7668	42.2955	58.6228	51.2115	56.6979	45.8773	53.1547	46.4267	53.1502	47.5064	35.2616	55.7419	47.9151	54.2998	49.2973	41.1062	42.4204	52.2507	53.5984	64.146
evm.TU.chr30.28	967.075	639.63	251.137	1.27563	1.11394	1.19741	48.5329	45.3928	37.8797	2.85517	1.94173	1.23375	3.004	7.09669	5.33518	0.356656	0.530129	0.219021	21.1213	51.1061	11.5354	0.547433	0.528919	0.269123	0	11.6732	1.42983	17.8178	37.7877	23.1212
evm.TU.chr7.696	85.236	86.0954	83.4396	82.8577	83.3396	80.3065	79.8707	98.1134	121.422	63.7085	49.4869	68.7799	73.8713	76.5618	53.4651	45.3893	48.2176	53.365	91.4276	94.8607	92.3848	51.8934	44.5308	60.6852	142.435	49.4755	59.4645	51.1604	39.7878	37.3822
evm.TU.chr14.125	137.439	124.932	135.227	168.428	155.46	153.02	51.9001	68.5393	58.2322	60.3217	68.1438	58.8041	55.9278	58.7272	54.6671	70.5487	66.3822	70.555	97.545	97.6063	96.3933	68.2589	75.805	73.1684	53.9665	81.9711	54.4196	72.9337	58.9347	63.5716
evm.TU.chr12.496	42.2745	39.6271	37.8074	39.7092	43.462	43.9835	37.8058	36.3589	37.7002	40.817	34.7663	36.4362	39.0778	35.6803	43.7488	52.0992	48.283	42.6393	32.9418	30.8068	24.6638	36.3461	32.9506	42.0085	36.8962	36.691	31.4517	38.2895	38.202	32.9221
evm.TU.chr24.148	12.8387	12.9909	11.3985	13.193	10.2874	10.635	10.3528	11.4585	11.2182	10.9624	12.4392	11.4528	12.0247	17.0507	15.5067	17.9255	13.6947	20.3063	13.4206	16.5724	16.5556	12.3049	13.848	11.862	13.6293	14.3846	11.0701	13.0154	13.1644	12.9689
evm.TU.chr13.495	179.188	180.02	179.124	155.878	158.825	157.98	96.8996	107.246	81.2203	94.7292	99.8445	101.388	87.0375	89.5515	86.0994	81.2787	76.0914	88.1521	102.851	123.75	85.5761	79.6952	80.2463	84.118	87.2713	174.88	132.871	128.446	142.836	115.899
evm.TU.chr24.222	30.4416	37.9985	42.9493	38.2187	41.4891	36.9858	10.9843	10.7628	7.18715	12.7123	14.8109	11.7257	5.84642	6.80936	12.316	12.1181	9.96416	10.5706	11.2396	14.3301	9.5073	11.5077	8.88724	9.19309	7.05115	20.3273	13.1585	15.0531	15.9802	13.2997
evm.TU.chr2.786	16.492	15.3124	14.8079	19.0541	21.1571	18.9099	24.5392	25.8712	21.7162	27.8317	28.5853	21.6797	59.5251	67.7554	76.4106	53.5127	48.3022	69.1611	33.8489	29.0877	28.0211	44.7523	41.5561	38.9332	59.4776	21.9989	30.8161	52.2087	34.2605	46.2285
evm.TU.chr9.374	12.426	9.11705	10.7044	14.012	15.533	13.4015	24.5394	32.0176	19.4196	31.1726	28.0837	25.7142	44.7501	49.3706	47.7496	40.5707	70.6404	75.9753	36.6356	31.8891	29.506	31.4365	34.4098	25.7914	27.5527	23.4476	25.8496	35.0979	32.3739	49.81
evm.TU.chrZ.859	504.561	550.103	672.114	906.66	729.732	722.363	420.742	663.976	642.473	783.397	677.004	813.138	769.206	1067.83	971.003	1042.58	897.276	781.906	857.73	869.805	1173.02	989.383	885.411	774.771	876.84	614.84	850.152	953.236	1085.83	959.009
evm.TU.chr2.1163	80.0818	90.8415	79.941	73.8145	78.2921	70.6618	22.8341	19.6622	21.2992	18.8184	20.2016	19.5248	27.0809	24.5475	24.1794	24.956	22.5619	19.4459	28.1221	42.7661	15.5385	19.2435	19.6185	19.3943	22.3545	93.6833	47.3192	44.5159	34.0596	31.0925
evm.TU.chr36.4	40.2668	38.6635	38.3555	35.1837	43.3025	36.9843	34.2319	32.4583	33.1637	30.0725	38.3561	34.2628	44.208	38.9033	42.877	39.6442	45.7816	43.0794	34.2018	37.5437	26.9005	34.0916	34.4457	38.1901	46.0022	37.3453	32.6518	41.0992	33.9105	38.2109
evm.TU.chr21.200	25.1481	30.303	25.6221	21.18	24.4542	23.2372	20.2992	21.8976	19.3283	15.9583	21.4688	19.2061	23.1547	24.2266	23.2688	28.9523	28.3474	27.0269	17.1753	23.1453	16.7682	20.2138	25.0584	22.659	16.5568	25.6456	17.9679	21.4772	16.1233	19.3112
evm.TU.chr9.38	195.172	209.594	248.403	244.418	213.812	201.086	97.9204	149.037	120.809	88.9306	72.392	82.6509	161.051	191.385	150.874	120.85	96.4414	145.379	291.592	306.266	296.301	143.704	125.043	128.162	171.924	241.302	225.786	215.027	182.032	223.893
evm.TU.chr8.587	15.9644	15.5533	18.8759	18.277	16.8736	15.2038	14.6117	14.67	12.873	12.1828	13.4174	11.6734	14.6111	14.6019	9.79394	13.8406	12.5067	14.9958	15.9654	20.1166	16.9545	12.7687	13.0131	12.2093	12.9367	20.0233	17.3629	16.4463	16.479	16.8174
evm.TU.chr17.235	9.87827	9.14535	10.0068	8.83278	8.57497	8.92903	10.6621	10.6337	8.76839	9.23435	11.8298	9.67082	10.1445	10.2042	12.3323	11.3756	11.2902	11.8408	10.5885	11.6602	14.9668	10.6944	11.5949	10.2515	11.8739	7.43365	11.1612	9.35084	10.499	9.7004
evm.TU.chr3.963	24.8746	25.8481	25.5372	24.5024	24.9268	23.6246	14.5508	16.1366	15.4339	12.253	14.0139	12.4458	14.9281	15.1791	15.5047	13.7334	12.4649	16.2611	16.0007	17.4162	16.2365	13.5248	13.8241	12.5763	14.8017	14.9634	14.1394	14.2186	13.9663	14.6278
evm.TU.chr27.195	16.8913	15.0987	15.3166	20.1514	20.3349	17.8602	15.652	16.5751	17.7204	17.5529	15.297	16.9814	18.9325	18.8742	20.1098	21.9534	18.4483	19.2224	17.6368	17.2865	15.8927	17.5965	19.5561	17.7427	23.656	15.4615	17.5725	17.4034	19.2859	19.1385
evm.TU.chr5.480	26.3349	24.7024	23.6879	25.5668	25.4781	25.7446	19.1002	24.1877	20.8553	17.854	22.7436	19.3324	36.9097	36.1428	38.1489	32.6937	33.8614	40.1634	22.9497	22.4744	21.3212	25.4587	24.6496	25.6131	28.7333	26.4458	25.0695	28.8661	22.4047	32.2721
evm.TU.chr5.741	44.0576	43.3113	35.2229	56.509	64.432	51.5465	52.7496	44.9285	47.006	45.8826	69.6875	61.078	57.3847	51.7498	55.3359	51.2889	52.908	61.0854	40.0492	45.7345	44.2799	48.2584	51.5216	49.9677	96.879	49.642	46.9284	41.2083	50.5001	51.0504
evm.TU.chr21.16	47.7931	44.2262	48.8656	38.7707	42.8105	40.3712	25.239	28.5844	25.3264	17.8824	22.8101	20.3409	34.9957	35.8981	36.2292	29.1772	34.1956	31.2331	29.9518	34.9389	24.8958	22.3735	27.5588	24.9601	27.908	44.6811	28.1461	32.3663	29.7908	31.0914
evm.TU.chr7.480	66.794	72.7066	65.0224	69.1411	67.5807	65.2726	38.4261	38.3791	38.5975	46.3079	52.6429	50.12	35.4416	34.4005	44.7716	46.3173	49.4582	52.8483	47.2417	47.7512	28.6556	36.4498	42.3408	39.6287	23.8918	99.45	42.5224	56.6744	56.8349	63.7693
evm.TU.chr16.332	31.6107	29.8974	29.2303	31.0038	30.0151	32.4472	43.7106	36.1937	36.2652	38.7639	42.8918	37.8572	98.4834	110.676	95.2657	54.9884	49.1519	64.0777	43.1784	44.1239	42.6947	47.6679	54.1426	42.7941	78.4304	41.8354	67.5697	57.7895	61.0041	58.1869
evm.TU.chr30.177	37.8435	34.635	32.9326	34.5485	34.4534	35.8915	24.6905	25.8588	26.0425	22.4484	20.4949	22.3354	26.3209	30.6549	28.751	29.3161	32.3561	30.2592	30.8928	32.2971	27.2292	27.8284	23.6415	28.6558	22.5974	26.4676	25.6728	24.424	24.5061	27.1161
evm.TU.chr6.634	70.043	72.5576	67.5402	53.6991	54.9175	57.4124	21.1686	18.6762	20.1245	14.123	17.1047	16.2874	26.065	22.9125	26.8954	20.3391	16.5973	18.2856	22.3007	31.7179	24.3253	15.3081	21.8559	17.1603	14.0588	23.6278	17.7009	17.6403	17.0238	18.0149
evm.TU.chr3.1312	2.05369	2.15855	2.23498	4.00923	3.50562	3.8939	10.5488	7.26579	8.86318	10.527	9.46527	8.10992	23.0762	24.2298	23.469	17.0519	13.2115	27.0423	9.14782	6.35733	12.5069	14.5421	11.178	9.89863	17.5356	2.63336	8.19632	11.9792	9.88077	9.95916
evm.TU.chr9.336	11.2579	14.28	14.1713	11.7843	15.8704	12.1668	13.3371	14.7252	12.1277	12.832	18.7428	13.9649	21.9006	19.1186	24.814	25.8443	26.4498	24.7297	11.0806	9.04223	5.37441	17.7877	22.3348	20.5248	18.0233	12.3067	10.9806	16.7979	11.0275	13.734
evm.TU.chr1.294	93.9731	94.8124	97.162	83.5777	86.8959	85.7755	100.691	103.245	114.305	94.7203	84.3514	73.0704	96.6034	120.25	100.095	121.071	129.06	77.4473	139.8	121.379	120.861	142.026	106.037	155.944	136.842	83.0544	106.594	178.01	121.205	106.667
evm.TU.chr5.922	316.972	317.317	388.65	354.426	316.866	336.036	133.029	177.968	147.048	143.154	125.3	129.936	113.831	126.529	95.938	108.816	94.0813	104.555	273.381	282.876	298.209	118.938	104.329	124.36	105.338	248.906	187.009	187.061	150.582	183.833
evm.TU.chr8.394	33.537	32.3494	32.072	32.7962	33.3581	33.7229	18.3121	19.7832	17.2513	16.7804	17.3051	15.7579	16.28	14.7107	15.914	15.9189	16.7298	17.2248	22.4709	22.4043	16.3371	16.4691	15.9335	17.4685	16.263	21.7685	17.4472	20.7767	15.7063	18.8835
evm.TU.chr5.1002	46.0224	47.4414	44.6031	49.8252	51.58	50.4164	39.108	39.0955	35.5736	37.0666	36.357	40.5928	53.2299	53.1972	54.9507	52.0455	52.0267	51.7089	47.1015	43.2348	31.7941	43.315	43.3312	42.0974	46.8634	52.6552	42.8447	46.2177	48.8608	43.6938
evm.TU.chr13.426	37.1051	37.8061	31.4409	43.5653	46.9008	44.2133	47.44	44.8638	37.7607	45.7171	54.4235	50.8034	45.0783	46.8633	46.9595	52.2426	55.5958	46.9331	39.3955	37.1695	31.7123	40.1627	46.9991	47.0796	39.9549	29.5351	34.3454	39.7179	41.331	35.3595
evm.TU.chr15.287	69.5751	78.0628	62.5583	71.0884	72.7018	75.5808	56.9869	45.7565	54.9757	38.1289	28.361	36.417	24.058	25.8905	26.6495	13.0233	19.1348	18.6252	36.7242	42.5555	41.3295	40.1902	27.2156	31.1693	20.3285	12.8762	21.9174	31.9268	23.4092	17.9952
evm.TU.chr25.364	16.0361	19.3647	15.4424	28.6297	27.7347	25.8271	89.8026	47.1817	69.8451	109.779	92.359	101.029	65.4418	47.4674	58.2578	64.3609	70.6259	66.1251	59.2421	35.9998	45.4558	93.4405	107.98	88.1139	38.3486	16.8181	30.7746	42.7389	49.593	47.1252
evm.TU.chr3.750	33.6798	41.9376	40.8298	42.5251	39.437	43.7755	31.1863	24.074	24.6503	33.2222	27.6451	26.0329	29.6723	26.2826	34.7977	30.1685	28.4802	31.2422	32.4466	28.7339	23.4597	34.7927	34.6889	28.9287	25.5903	25.1253	19.0208	27.0166	33.0329	31.5757
evm.TU.Contig317_pilon.3	3.13307	5.23843	3.77934	6.14762	6.96674	7.06433	17.2325	16.1712	17.6754	21.7029	17.9478	12.1247	26.7103	22.8194	20.9779	18.5969	18.6888	18.6069	40.0855	16.4074	25.6048	77.071	44.2926	84.3294	35.9954	8.12976	24.8653	44.3231	46.7337	41.9571
evm.TU.chr5.407	316.005	286.606	340.218	374.507	333.367	420.067	272.584	324.543	337.433	286.613	221.029	221.032	317.358	361.43	296.153	346.98	260.038	322.252	402.088	346.965	430.278	290.749	286.769	280.196	365.773	318.334	442.931	348.67	316.808	293.202
evm.TU.chr5.942	13.6309	14.1619	12.5602	15.0346	16.0091	14.6192	13.4517	13.3749	11.2897	12.3504	14.0011	13.087	16.5657	17.6998	17.6737	15.6853	15.8312	17.0183	12.057	11.4719	8.65917	12.9472	14.2081	13.2393	13.4665	12.5922	11.4204	18.335	14.2284	16.3357
evm.TU.chr3.1664	91.3511	97.3278	91.9509	101.225	106.466	92.1596	77.6467	65.1741	75.9147	67.4991	64.9668	65.2714	82.684	84.1194	89.539	91.1735	84.2502	91.6537	78.3815	91.329	76.1321	76.9248	89.1067	77.1653	91.9978	88.0276	86.3199	84.9073	91.2898	85.1841
evm.TU.chr26.340	71.6585	73.9043	69.8366	63.4019	62.9219	57.4406	35.7931	42.4606	31.8515	29.0474	38.3986	37.2291	52.1225	53.485	40.5243	46.835	53.3542	46.4729	47.6651	54.2886	37.4996	35.5248	34.9978	40.0387	39.2098	60.3763	49.9688	45.8609	36.2487	55.3881
evm.TU.chr3.173	18.1847	17.6837	17.4505	18.9477	17.6049	17.3836	15.4763	16.4841	15.2373	14.4157	13.7561	13.4724	16.066	15.3912	19.9116	16.9018	14.4988	17.2008	18.3426	18.9112	20.0441	16.9898	13.6148	15.5867	14.9007	19.765	19.4391	17.672	17.3083	17.2502
evm.TU.chr5.1207	14.1939	13.726	13.4018	17.3444	16.4437	15.3282	23.9744	23.5029	25.6561	16.9955	18.4445	18.0988	28.392	23.5511	26.5527	18.1015	18.6725	19.2627	19.7538	18.5906	18.3459	18.7687	18.1959	17.9332	42.375	15.3915	31.4539	26.5931	20.8702	24.259
evm.TU.chr6.222	44.1299	43.6831	41.4547	38.5662	37.0335	40.132	17.5169	20.4542	20.0738	15.4941	20.5147	15.9914	25.266	30.4035	23.8391	27.1423	33.2736	25.2433	26.668	36.2192	29.656	17.2114	22.823	23.3565	17.8371	29.5779	27.1591	24.8697	18.3513	22.0471
evm.TU.chr11.249	136.445	124.753	106.725	137.437	153.716	166.24	95.2733	61.0777	108.026	139.038	116.502	132.384	54.4618	34.6994	58.0264	90.5633	98.408	70.1899	61.0607	97.3015	99.4369	80.8218	115.352	88.1115	26.5702	54.3659	31.235	32.606	36.8561	30.0141
evm.TU.chr4.288	91.0273	89.4875	84.8157	95.7858	105.499	111.534	96.4776	116.527	100.111	116.941	92.4808	94.5762	203.12	177.022	188.647	170.052	146.876	245.673	175.192	138.458	121.88	180.299	133.818	142.478	164.074	125.08	121.013	220.352	193	237.094
evm.TU.chr14.85	45.5227	60.8519	55.4365	37.5182	40.707	44.2994	130.207	110.516	20.2944	180.637	316.83	331.817	100.538	34.2993	43.1121	45.6086	78.9835	58.9896	46.7457	52.3775	17.5265	47.6203	125.698	109.605	9.89956	208.878	81.9462	173.401	217.507	197.654
evm.TU.chr4.1047	21.4889	20.6091	17.2209	18.5551	18.456	20.466	16.4322	15.8207	16.9502	13.5787	14.562	13.2124	10.3858	12.4439	13.002	18.5227	15.3045	14.854	12.2947	15.319	14.8481	14.4841	11.9186	14.2586	12.204	10.9628	10.9826	9.65967	11.0978	12.0483
evm.TU.chr14.376	22.3819	32.4865	18.4528	19.6231	18.6469	18.0498	68.7851	81.2659	61.3737	46.0778	60.2334	50.8784	147.596	126.02	105.71	98.31	95.9282	92.8328	80.5526	81.5598	110.355	83.7925	72.9213	112.408	203.373	57.9036	157.944	184.076	112.658	158.311
evm.TU.chr16.170	28.0818	26.6347	25.8482	26.4162	27.8386	26.2226	19.59	18.3838	16.7407	17.1318	20.2931	18.2501	20.4678	18.8026	21.3949	22.5797	22.2736	22.1771	17.7536	18.0144	12.5996	17.0437	20.0581	20.1587	21.2128	20.1797	15.4555	18.2174	15.3081	16.3035
evm.TU.chr6.33	167.154	161.075	194.111	234.329	182.403	221.477	128.497	163.015	128.114	147.304	143.3	143.068	122.255	136.351	119.813	138.668	133.593	142.057	212.214	215.343	202.554	143.373	105.757	130.491	132.062	154.973	175.012	168.979	134.173	169.902
evm.TU.chr1.2099	139.494	136.207	108.443	179.977	196.235	194.858	260.112	333.512	238.481	268.431	274.228	270.445	446.827	406.14	442.912	391.663	416.325	450.349	205.879	179.195	254.08	352.316	380.329	310.886	397.331	144.13	197.794	328.421	335.285	395.763
evm.TU.chr7.555	114.54	117.888	115.675	100.443	116.567	114.544	107.11	97.8226	90.2327	102.099	97.15	107.679	60.7056	68.7328	57.5347	53.5855	55.6317	54.7777	70.436	70.5102	39.5045	60.14	63.8834	76.8915	72.6099	75.2635	62.9677	79.4832	77.7109	84.1488
evm.TU.chr3.1610	27.4777	29.3099	29.4257	30.5321	34.8553	34.9352	30.762	29.2167	28.5407	31.9231	34.7925	35.0683	35.1352	37.344	39.4739	46.5017	43.8974	36.6979	39.9398	30.1781	31.0455	41.3608	43.1466	41.5	55.3771	33.3702	46.2741	35.5956	33.7313	42.9387
evm.TU.chr29.37	497.541	501.518	553.572	530.689	487.808	489.116	406.021	445.582	466.212	381.797	409.367	457.624	311.031	371.922	309.394	354.331	342.24	352.938	556.607	546.013	593.76	402.67	326.41	384.799	324.149	494.431	456.184	395.408	382.414	390.879
evm.TU.Contig155_pilon.16	810.797	663.894	653.125	549.659	605.673	543.763	461.513	493.244	530.267	434.477	415.761	359.605	503.431	487.332	511.403	420.756	370.881	514.99	548.065	606.804	805.132	344.396	422.973	439.73	385.412	437.825	421.527	417.427	379.514	465.13
evm.TU.chr21.233	61.9062	60.8814	62.1993	47.7152	58.2306	54.9254	33.0904	31.1999	27.0729	28.8707	31.3607	28.9232	35.1543	25.2033	33.0842	29.3225	31.937	29.541	34.4251	32.6017	13.5285	30.6574	33.4734	32.9462	33.3675	41.7214	25.7361	34.7128	28.2318	32.101
evm.TU.chr29.40	14.4979	20.2039	18.8895	14.2803	15.6596	16.2318	133.378	91.2226	104.426	153.445	77.544	105.321	48.4894	44.0922	31.2056	20.8352	34.4012	27.9103	46.8078	39.766	48.1105	69.0326	84.035	56.2933	66.1509	17.5904	61.9274	44.0704	43.4297	31.4049
evm.TU.chr6.110	149.166	173.39	174.654	136.634	118.149	130.522	77.8778	100.78	96.581	62.4403	64.8162	60.5762	85.092	86.9652	78.9333	73.4847	79.6263	78.1489	91.2297	99.9625	93.2901	69.9671	73.468	70.3875	95.2689	147.798	112.269	84.9785	104.074	95.2725
evm.TU.chr14.123	38.4491	40.8725	43.3183	47.5661	44.5919	44.6944	49.0909	57.6386	51.269	51.5105	49.2957	47.5583	59.5819	62.3538	53.8567	62.9183	64.7879	58.5318	53.6763	51.2493	56.0587	63.4997	60.9798	62.0909	61.712	34.2285	53.8726	46.9657	59.0816	49.0816
evm.TU.chr5.558	157.844	150.949	178.477	169.046	160.11	155.045	94.61	101.24	98.9394	83.9647	73.6705	81.8345	93.631	90.525	72.8129	70.6677	70.9939	61.5038	100.164	108.379	100.184	80.1457	70.1072	64.3177	76.2173	123.808	95.7386	102.598	95.2042	114.961
evm.TU.chr24.35	75.6841	77.3886	72.8227	78.1015	80.7124	76.9358	71.0519	68.3621	60.7069	61.0175	55.031	66.7419	63.7316	68.2334	60.0394	60.5731	61.5147	62.1888	102.054	98.7594	76.2845	86.5316	64.319	80.3182	85.7429	84.8638	87.4171	92.8964	86.3013	102.006
evm.TU.chr26.171	83.0341	82.3613	70.5075	78.7816	83.3739	82.8883	67.0752	61.9782	57.4983	52.9277	69.8429	76.8788	66.2556	69.5589	53.9881	68.2892	84.8261	55.1612	57.4637	65.5545	56.2944	42.6612	51.7119	57.4652	61.8301	43.6331	58.2762	42.568	46.2273	37.3877
evm.TU.chr2.1198_evm.TU.chr2.1199	55.2842	47.2998	68.1077	44.0827	41.764	39.2817	10.5378	11.3244	9.16612	7.99323	9.34885	6.42014	8.41926	7.85522	9.45218	10.0916	7.19844	14.4031	10.6465	17.7166	8.92047	8.94827	11.228	7.86979	2.74147	31.3013	13.6776	17.9308	18.3079	12.7595
evm.TU.chr3.601	14.0224	14.7229	13.5277	13.8513	14.8915	13.7495	13.259	12.4394	12.1598	13.1341	13.4295	14.7471	19.1752	16.1191	18.6575	20.011	18.2551	20.6339	13.7702	14.0948	12.0054	15.744	13.3984	17.1919	13.4297	11.0489	10.21	12.0888	11.8094	10.6713
evm.TU.chr30.221	1321.99	1575.64	1925.47	1799.89	2168.48	1898.15	217.782	132.829	55.0689	39.3455	56.1984	30.3187	22.4767	33.9161	19.35	14.0349	13.3187	22.3966	37.2121	51.0114	82.2279	19.1101	24.0589	13.3803	11.1715	53.9785	19.7117	41.6762	40.4548	40.4892
evm.TU.chr4.555	154.913	156.088	163.347	156.25	144.715	150.611	73.8195	81.11	81.9702	73.8084	76.0264	73.7916	64.0315	90.3686	70.6719	56.5644	53.2185	70.3741	79.2089	85.4481	77.4922	51.9673	66.7586	55.1799	62.6193	100.622	86.1203	77.5154	62.5108	70.2373
evm.TU.chr1.427	76.1067	80.6247	82.5249	75.5313	71.359	75.7765	89.2657	91.336	63.7951	80.6998	111.56	98.3884	93.6283	90.3696	84.3604	87.2709	88.8526	102.41	82.2637	81.2922	82.2351	89.4162	87.6268	90.213	92.3795	138.286	123.296	109.521	132.677	110.798
evm.TU.chr10.121	21.8651	23.3596	21.0866	27.1115	24.7389	24.9082	37.4534	36.287	37.9748	36.7615	37.4745	36.9792	38.1324	43.6333	39.5438	43.3537	44.9285	41.6727	32.497	31.5431	34.627	32.6932	36.8283	34.5927	40.7107	31.7764	40.716	34.7908	35.2172	32.9075
evm.TU.chr1.1307	23.7769	23.7474	23.3976	20.869	22.8699	24.4683	23.9432	20.3453	19.2306	18.6194	20.1986	20.1584	30.3004	29.4339	26.7189	27.6453	26.6583	29.7074	26.928	22.7171	17.3203	30.3742	25.089	30.9719	23.6044	33.4556	23.0707	30.805	35.9778	29.0849
evm.TU.chr28.54	318.528	272.251	239.088	212.903	245.252	225.447	152.023	190.671	202.626	119.648	107.701	106.422	161.463	133.349	154.811	140.735	137.537	164.631	264.064	369.392	397.805	129.441	95.1181	114.67	166.547	295.486	283.286	175.358	164.425	169.405
evm.TU.chr29.249	115.705	108.97	112.664	101.463	92.5275	98.9827	54.0463	67.033	62.7179	50.9329	48.3674	53.3108	59.9031	64.8743	64.4805	64.9245	64.3567	64.912	94.9524	110.242	105.952	63.6345	54.6252	58.551	60.544	95.4104	76.3108	68.1086	69.5663	60.919
evm.TU.chr6.184	98.2459	95.3936	94.3728	85.7437	75.8481	85.1898	48.4793	48.4505	43.0359	40.5426	39.9543	36.7453	43.6202	41.7868	43.8248	46.8458	44.1557	48.7977	76.447	91.3412	78.6929	46.0429	43.6846	49.0543	38.5129	82.3624	56.8176	51.7458	59.1318	56.663
evm.TU.chr8.118	213.782	214.704	209.872	149.517	144.258	150.792	63.9947	54.8833	56.582	47.4859	54.0811	56.4466	42.1746	49.1872	49.6794	58.9933	53.4716	46.8491	67.3136	98.8932	54.141	49.1873	53.9511	58.7044	41.9193	102.792	53.3203	60.8589	67.508	56.4816
evm.TU.chr12.353	49.8588	51.1023	41.6716	55.9315	56.7936	55.2969	114.942	86.2114	108.519	137.154	115.893	117.834	100.594	105.618	105.588	117.166	130.24	112.189	117.816	93.8963	109.554	126.89	106.443	105.375	79.0447	48.16	66.3944	78.395	112.212	76.0048
evm.TU.chr27.2	62.1041	63.0703	63.4563	73.6147	71.4704	71.0311	43.1191	46.4932	45.1852	36.7613	56.3256	44.3029	45.4651	47.7321	53.5122	51.3026	46.0942	57.071	50.1785	51.2638	50.3279	41.4801	39.9916	42.635	50.3978	43.6582	41.7662	44.6525	34.1612	36.6955
evm.TU.chr14.216	70.826	60.3947	75.864	75.0885	81.731	68.2313	48.8087	43.3444	46.1439	56.244	55.0977	54.1742	39.9992	47.2148	39.9868	59.483	55.8516	53.8415	57.5161	48.1551	43.4289	60.5584	63.9983	62.9359	32.41	56.8291	56.1623	78.6776	55.6555	54.4081
evm.TU.chr4.614	30.8176	28.9343	28.8578	28.3923	30.1369	27.3685	23.6999	22.9118	16.8982	18.0179	22.8456	21.8262	20.908	18.9714	26.0176	21.7213	18.2647	20.7402	32.6874	41.6516	26.4008	20.4663	17.0518	22.2597	23.8104	56.7399	34.1857	42.9338	49.7793	41.4066
evm.TU.chr1.2762	10.3969	16.501	13.1674	27.3344	27.043	24.8989	33.5803	26.1652	26.1426	33.0769	31.0094	32.2399	24.0479	28.7718	24.588	18.7216	24.022	24.251	26.4009	23.5294	31.6364	39.646	33.0026	27.9393	25.6571	9.09456	25.2194	26.7797	34.4055	28.8792
evm.TU.chr1.2404	50.5897	47.7771	58.4529	61.2491	48.6929	56.5318	37.7225	52.9078	48.6307	47.557	40.5945	43.5077	35.9416	46.5557	36.1496	42.6325	36.0113	39.1033	55.0849	52.8469	77.8274	40.7319	37.5823	36.5627	27.1514	49.3066	43.385	46.1397	43.8671	49.2091
evm.TU.chr1.1399_evm.TU.chr1.1401	28.6179	33.2747	34.6169	36.8577	37.7439	32.1914	25.7961	18.2385	18.2819	19.8726	17.6737	16.8058	9.16555	8.21501	10.2082	10.6375	9.37087	9.85317	15.0893	14.6915	9.2146	13.9439	15.1086	15.2417	1.99429	15.3383	7.19923	15.5036	11.2764	11.3148
evm.TU.chr5.978	4.25021	4.2973	3.62917	4.85478	5.3758	3.58208	15.0878	10.6736	11.0394	13.4648	14.2609	12.5459	11.0112	10.3736	13.8304	12.2929	11.0281	14.4073	6.29525	6.03728	6.04445	8.89856	10.7081	8.9414	8.39671	2.31026	4.93242	6.38902	4.9404	5.0425
evm.TU.chr10.421	55.4401	57.9547	57.7239	56.9222	53.9397	55.711	40.7994	48.5023	43.878	37.8363	39.41	41.3186	41.5495	42.4627	42.9923	40.0384	37.5613	42.2268	42.3723	46.9421	43.3138	35.7829	34.7176	43.9913	40.9825	47.2646	42.5629	42.0787	37.6709	47.4229
evm.TU.chr11.164_evm.TU.chr11.166	28.8921	28.6824	26.0027	23.747	26.4207	25.5001	20.3026	19.5457	15.5846	15.9903	21.8519	21.4433	27.1467	25.5913	26.8753	23.7945	23.5559	28.8507	17.9095	21.9029	17.3998	19.8841	18.9877	20.8105	21.3557	23.7389	19.7236	22.3652	21.1926	21.0282
evm.TU.chr15.210	54.564	56.776	60.7476	48.8101	60.2482	55.2292	23.3925	31.5204	26.2806	20.035	22.2905	26.0766	33.9652	28.6112	26.4404	19.5718	22.2197	19.465	27.3613	24.7456	11.4427	19.9972	18.5768	23.5913	31.4605	52.1077	38.5212	38.5298	23.146	43.8909
evm.TU.chr17.167	20.5948	19.6683	21.5215	20.266	20.5142	20.4667	14.6405	15.2698	14.7271	13.6081	12.1009	14.1565	14.2032	12.505	14.1693	14.2746	14.0303	13.8835	15.8529	16.5689	13.8739	15.4277	13.0683	15.4601	14.1088	13.3872	12.9018	14.7969	13.6594	12.0317
evm.TU.chr12.59	19.1991	19.1019	18.0854	19.4979	19.2674	19.7516	19.6197	17.0493	17.2413	22.3012	19.7223	19.3598	20.422	18.9697	22.5772	20.6147	17.7897	23.2129	14.8839	15.124	15.3338	17.4806	15.4206	16.3198	14.5618	10.6664	10.6739	12.1144	13.1687	11.7893
evm.TU.chr30.55	139.526	131.748	131.899	118.047	107.829	112.542	64.1716	69.4286	63.8066	59.9089	62.7511	57.6088	59.1253	58.4672	61.0065	72.8483	65.2031	64.2577	92.9362	140.203	115.853	65.302	52.288	61.8889	67.8422	88.3049	86.5315	70.5732	72.2628	77.7095
evm.TU.chr18.339	32.9935	30.4098	27.1138	35.218	34.1395	33.2587	25.0559	22.0447	24.6932	25.421	21.7431	22.5354	34.642	31.1887	41.1359	35.1106	28.2028	34.3015	28.8506	29.5119	24.3048	26.6586	23.8302	24.8347	41.8349	30.2295	46.89	29.7323	28.4849	25.3021
evm.TU.chr9.2	52.8321	58.8366	49.9823	52.2885	55.6889	56.8909	50.9327	45.4864	41.5885	42.7233	41.7435	43.9075	76.1455	48.7589	73.1721	56.6759	54.642	57.169	35.0883	38.8529	30.8982	48.9291	41.8485	48.9203	58.6755	61.2694	50.9097	51.4653	51.8994	59.7769
evm.TU.chr25.64	190.577	183.489	201.517	108.639	106.336	130.858	68.3953	96.6872	72.2248	54.6795	54.0951	64.9037	51.7751	45.9726	52.214	46.4332	51.8339	47.1352	85.3321	130.281	77.384	52.4321	42.2264	50.5094	37.7861	170.044	102.047	74.5382	76.1751	73.4823
evm.TU.chr27.54	134.224	142.007	152.409	135.137	121.438	147.002	78.8166	95.3361	71.3117	102.774	88.937	94.813	84.7699	91.7766	83.5956	104.033	87.6747	96.685	130.579	136.206	125.337	108.978	86.2453	104.493	102.034	110.515	103.375	91.7821	109.935	95.414
evm.TU.chrZ.770	130.797	140.846	144.386	158.34	147.15	155.156	113.916	143.705	168.238	158.979	95.7837	149.754	117.205	146.536	120.833	87.322	76.8046	67.5091	158.609	153.868	161.277	183.079	131.923	117.671	153.96	123.622	133.042	168.454	198.848	140.013
evm.TU.chr29.111	13.4983	11.1453	2.52969	0.614345	1.2782	0.619634	125.678	160.87	201.062	14.8392	14.1285	20.3992	0.734393	0.682158	0.157191	0.238326	1.20542	0.352337	3.30577	11.6273	0.390919	0.558873	2.25806	0.574471	0	745.255	273.895	110.81	200.296	98.4036
evm.TU.chr19.279	87.1526	85.3304	112.316	89.7285	109.173	94.6807	83.4222	73.0647	62.7146	92.7531	84.2573	86.3898	68.3553	53.3406	60.7966	87.2176	93.1335	86.0988	82.5677	49.0106	58.1094	95.7776	94.6529	120.576	49.7705	42.6506	25.3071	57.2826	59.1072	60.2477
evm.TU.chr19.349	118.694	98.877	112.753	132.916	123.524	128.325	85.1449	90.2274	80.8105	85.8523	78.71	83.2926	62.6173	56.4709	77.673	71.1923	75.211	63.8161	121.056	123.538	146.337	99.112	79.0846	103.167	70.7152	58.0829	71.5418	107.182	84.2281	92.7653
evm.TU.chr15.129	8.44277	13.6842	12.166	22.241	21.8341	21.4329	40.1966	50.1799	53.4468	52.3009	78.3838	63.3167	73.2076	69.8452	61.1326	86.0865	94.875	47.6831	42.6058	29.3715	50.7319	50.0053	58.939	52.8087	72.563	23.5062	89.4757	75.6307	55.3919	48.6949
evm.TU.chr5.1054	17.514	15.5858	16.8474	13.8043	12.5931	12.8942	34.838	37.2236	25.8666	19.248	22.4736	14.8431	41.2738	31.1966	34.592	27.8298	21.0061	24.9005	23.546	29.2618	21.6034	10.001	24.6446	10.5646	39.7006	61.765	23.7977	26.0482	61.698	47.1812
evm.TU.chr28.170	17.3234	15.931	18.2323	15.9287	18.8646	17.2241	38.4752	47.0878	44.5125	34.2032	36.4293	36.7398	74.1841	71.7249	44.3761	40.4609	41.4261	46.1688	44.5747	50.711	57.9173	42.0507	43.7599	39.1072	92.7508	28.7963	79.2704	34.1393	32.9815	44.5936
evm.TU.chr2.820	11.1069	12.7405	12.3277	13.0691	12.7653	12.6924	36.3837	30.3446	38.3637	29.543	28.2937	25.9935	37.6475	33.5238	39.9613	34.3809	32.3696	35.1667	20.8008	19.5947	21.7846	25.5576	23.9449	23.626	36.6993	15.6978	31.0568	20.406	19.2868	26.1486
evm.TU.chr19.348	614.974	610.308	590.735	627.619	606.967	650.696	374.115	378.704	420.595	436.372	431.952	405.297	451.229	429.595	497.534	541.271	534.814	471.199	502.726	557.829	554.623	532.046	529.871	573.643	503.557	405.537	380.041	385.138	449.623	416.306
evm.TU.chr11.237	35.5872	26.7641	27.6122	32.5955	27.7929	29.6973	31.3607	24.7304	27.5463	25.4946	15.8801	19.9279	19.6328	21.5853	17.1977	16.2034	14.6565	16.3602	30.6917	37.0435	34.1088	24.2662	20.4979	25.5823	22.7003	22.6791	23.5299	26.469	24.3391	25.3956
evm.TU.chr29.238	64.3642	65.1524	65.2158	87.9204	70.4292	62.3036	33.9682	46.5693	39.5081	40.509	49.6602	36.6111	36.4768	60.3353	42.7276	77.9699	53.721	51.0517	85.7858	71.7463	93.6849	70.4249	56.6289	54.8812	57.0322	60.051	70.3083	65.4274	50.5996	53.6295
evm.TU.chr8.144	5.23791	3.6002	4.54847	4.55882	3.93331	5.22286	33.7072	17.6501	31.3567	30.1706	16.6364	21.9272	47.9705	34.7447	25.2377	31.2401	32.8164	21.6844	34.217	25.1992	45.0969	46.7175	55.3621	55.5506	146.811	8.83389	53.4283	14.3967	28.5224	16.0259
evm.TU.chr2.959	33.299	31.5068	31.778	33.8699	33.7084	33.9378	26.6356	27.4248	27.0446	25.6956	24.6627	24.4784	31.0293	31.2292	32.8732	35.4843	32.9403	36.318	39.5747	36.4146	33.2504	34.9975	30.7487	34.4349	38.9396	34.7594	34.366	32.83	35.574	34.1406
evm.TU.chrZ.144	66.9885	70.4522	64.8141	70.0821	63.0292	75.2421	38.0067	50.9524	50.7749	54.8988	61.3468	52.2523	47.7549	53.6569	56.0478	65.3761	72.3922	55.2668	48.1641	62.4374	56.3958	54.9887	77.308	58.3721	43.6142	72.8547	44.2979	47.3085	57.0038	44.2248
evm.TU.chr17.9	81.6032	89.701	94.3993	84.6021	77.069	80.4093	44.0215	55.4063	50.7198	47.2486	50.0302	48.5582	48.6104	44.4865	42.3828	45.3433	46.8613	37.5276	57.2048	60.3382	52.3215	41.8986	37.9053	39.5084	51.686	67.726	62.0775	57.5472	47.8227	69.454
evm.TU.chr8.427	35.2504	32.7449	35.034	36.837	30.8247	32.8957	31.8027	38.8114	42.6851	21.4162	20.9029	21.4144	30.4813	36.9766	25.112	25.8568	21.9021	22.6228	42.6104	49.4094	51.8066	24.5549	21.3568	24.0075	76.746	31.5687	69.9619	27.3557	29.2648	30.7099
evm.TU.chrZ.906	35.1118	34.0388	37.6308	31.0307	33.6956	32.7446	24.4952	26.7082	49.6742	39.3562	25.285	45.6348	65.32	61.808	62.1258	35.788	35.6194	36.3346	26.1392	27.8628	23.7421	47.3769	52.2124	28.1724	58.2449	27.9816	28.4342	25.851	49.558	28.5196
evm.TU.chrZ.206	30.3478	29.6587	29.6573	29.4499	29.6162	30.6587	103.838	102.335	151.161	113.423	87.3214	104.28	178.798	165.428	143.736	100.352	89.7882	98.7528	58.5002	47.8307	58.7131	79.8493	95.1879	63.6115	203.712	39.2896	119.308	46.5447	72.6258	45.0485
evm.TU.chr1.1691	26.9406	28.0574	28.9982	28.314	28.8216	29.2911	29.2307	25.7818	26.9768	23.8226	25.5826	26.6893	37.6941	31.5887	36.005	33.3626	34.7996	33.6862	29.8329	29.8911	26.9046	29.3332	30.9807	31.1854	30.8777	25.2534	23.0184	27.1641	28.613	27.5373
evm.TU.chr22.48	33.4726	34.0286	36.538	30.7887	31.176	31.7707	34.0782	39.1506	31.1586	31.3255	38.2894	46.8894	42.1131	45.9292	42.0253	45.2164	47.6142	42.5363	23.566	27.5029	21.9049	31.2713	39.5927	37.2627	36.907	62.938	39.1779	43.253	48.4994	42.8035
evm.TU.chr4.1014	9.8968	10.2399	9.75871	8.84702	7.63405	7.70578	12.6102	11.7855	14.1093	15.562	17.3016	12.8798	31.5569	22.9357	39.2538	27.8969	18.6205	28.2068	15.0458	14.4152	18.8524	13.8422	17.5599	10.8893	13.3454	13.298	14.7402	18.9945	19.6488	19.7446
evm.TU.chr2.1128	37.9398	51.4413	45.0365	50.2106	52.5357	59.5774	53.1079	28.5724	49.7366	54.2049	49.2639	61.3455	68.6404	75.749	75.4883	90.0013	109.431	129.217	67.9139	38.8567	59.1602	91.6	82.4517	78.6743	11.4058	14.3987	22.0768	50.2214	71.2481	58.697
evm.TU.chr27.365	56.474	66.8698	60.9257	74.0469	79.4688	79.3093	57.8761	55.2165	62.2537	45.6459	39.031	47.2133	49.7517	49.3228	37.4067	36.121	39.6894	38.1608	47.833	41.49	35.157	42.2841	38.4416	43.6103	53.9868	27.6738	31.1965	30.8822	24.0893	33.6011
evm.TU.chr5.525	19.5834	20.4071	20.267	26.7319	27.5063	23.8577	28.3323	26.5452	26.2588	27.9283	20.7052	25.9146	22.9681	23.9296	24.7312	19.8079	19.0659	20.7013	33.799	31.1538	27.7792	32.7257	25.5807	27.6095	23.7729	17.1119	22.5991	30.1575	25.4126	24.4609
evm.TU.chr26.325	64.6917	62.1945	70.6106	63.0421	54.0828	62.8653	51.4393	58.0116	55.4949	60.0327	65.84	66.6813	38.1282	33.5067	37.0066	46.169	43.657	39.7321	74.3253	84.3531	72.6621	92.1784	48.1911	120.362	67.5272	48.3287	56.0865	79.4815	66.9499	58.0218
evm.TU.chr1.2856	71.923	67.7194	67.0099	61.0133	60.655	56.5606	51.4244	62.4112	52.639	53.762	53.8639	51.4474	83.7106	95.2259	88.7033	73.9461	94.3205	95.4866	50.1258	61.8241	78.8173	63.2836	43.0336	38.838	77.6921	61.5472	80.8149	52.3529	59.4232	59.3282
evm.TU.chr10.343	158.189	133.354	129.269	89.3809	92.5452	85.4653	104.151	88.2716	88.8966	75.7451	74.3344	84.087	73.6412	75.5417	88.5059	89.1807	77.6433	79.9168	63.1066	111.49	90.5174	41.6636	56.0102	62.0357	110.023	141.541	105.547	70.184	91.5223	70.6174
evm.TU.chr15.106	25.9028	23.4108	19.8871	23.7469	22.6285	24.8428	21.4405	18.8195	17.3684	23.8789	23.9728	22.9152	32.5074	32.9845	37.6133	39.8291	32.8429	39.0137	25.7075	29.2669	28.6954	26.632	26.9566	26.4843	20.6511	17.3227	17.4966	26.8591	27.2061	19.8363
evm.TU.chr22.87	396.848	405.835	529.546	537.318	464.009	479.455	300.851	467.447	387.09	373.237	336.033	313.973	328.552	422.22	326.931	370.158	303.36	321.261	551.346	548.58	718.365	341.265	299.897	329.401	349.266	463.104	564.431	499.444	415.269	443.608
evm.TU.chr4.530	11.8426	11.4409	10.7101	17.1171	16.1134	16.033	29.2979	26.1751	20.9469	27.8818	29.5767	25.8212	44.2792	55.0038	51.7242	38.2691	38.5259	46.6488	24.4783	18.8819	25.7126	36.7479	51.91	32.0112	35.3849	12.3041	31.8062	31.2461	33.6817	25.6246
evm.TU.chr16.61	13.3164	13.514	12.2302	12.7716	11.1394	12.7965	15.8719	18.6291	15.119	15.763	14.1357	15.0288	19.0108	17.9449	20.757	19.6858	20.2301	20.3908	14.4148	17.1299	19.0125	15.021	15.6476	16.7473	20.3069	20.1995	16.879	18.2617	17.4994	15.9211
evm.TU.chr16.146	80.8432	80.6237	70.1879	91.5176	88.6114	88.9151	150.264	181.782	191.537	178.648	131.43	146.629	191.759	242.787	212.918	202.014	175.709	194.227	232.533	196.841	274.492	190.103	161.363	176.353	208.144	130.649	186.232	171.365	146.65	168.877
evm.TU.chr3.288	34.4659	32.1648	30.4188	38.7181	35.265	39.0272	18.6432	18.963	18.7724	19.1881	16.1356	17.9476	16.6293	17.5545	17.0877	19.0455	19.3717	18.6533	18.4923	19.9067	17.3232	17.0254	17.7618	20.2266	19.6082	16.5928	17.6467	17.5554	16.9437	20.852
evm.TU.chr25.296	28.1445	28.6123	27.7033	24.5423	24.4544	24.2694	19.2222	19.2452	20.4309	14.2738	13.8039	13.7665	14.8845	13.5949	15.4131	15.4994	13.9422	15.0049	19.1734	21.5071	18.0145	15.1696	16.4527	15.1229	23.087	22.7388	22.3457	16.5036	15.9016	16.769
evm.TU.chr4.490	23.1681	23.294	22.9961	21.4754	22.7362	20.4211	16.4316	16.2365	14.2165	13.4439	17.1551	15.3175	18.9777	17.7171	19.3544	16.3548	17.2963	17.6213	15.729	15.7737	10.9945	13.8199	16.2843	16.5643	20.5295	22.1616	19.4348	19.7503	15.0737	16.7246
evm.TU.chr19.167	60.128	63.319	71.5586	57.2091	55.0961	58.0705	41.3605	41.7394	34.6871	36.7191	35.9254	36.9559	42.3833	43.3029	47.4943	51.7589	51.915	48.7116	52.6131	55.0907	51.5296	38.1399	40.3414	37.8305	36.12	66.2391	53.2288	47.1197	52.574	50.7189
evm.TU.chr16.381	24.0172	22.484	24.2352	20.4547	24.2182	23.487	26.3973	22.4193	20.3438	22.5296	25.4261	23.7499	37.7488	34.5817	42.5907	35.5862	30.8418	40.5531	22.1883	17.1712	11.7461	24.4478	33.1762	26.3216	25.4407	19.8425	20.4157	27.6877	27.1383	25.2266
evm.TU.chr28.242	14.3594	12.6976	12.2184	15.9744	19.3621	17.5168	28.2166	39.2514	39.0786	40.9271	41.1936	49.5697	27.2123	32.202	38.4784	33.8738	40.8739	41.5555	30.0421	26.6997	30.3651	34.7013	38.7464	34.0574	29.9648	27.5122	30.8825	47.1872	41.7954	40.8691
evm.TU.chr1.19	66.6174	64.0111	57.8495	45.6784	51.7188	49.328	81.2874	88.1929	87.2329	74.1071	94.2617	87.3626	93.6652	89.3919	97.6988	95.2608	98.7639	96.5534	69.3339	94.8722	77.9737	79.6667	70.1113	94.6281	91.8649	102.258	91.4219	84.4213	87.3173	76.724
evm.TU.chr2.1127	35.2915	42.9479	38.9837	38.2111	35.3574	38.0599	29.7387	24.362	22.1193	29.2917	22.2756	25.1824	26.4683	27.3635	28.372	28.7116	28.2283	33.3757	24.7099	25.8822	22.9613	23.8794	24.1185	24.8481	23.1164	25.7413	24.7143	27.1173	27.6416	26.8208
evm.TU.chr22.81	14.6139	13.7643	15.544	13.8633	17.2357	14.601	9.11938	11.101	11.0138	9.11394	11.9598	10.344	13.7899	11.0663	14.4378	16.2455	16.6373	16.4595	9.79554	8.04686	4.29997	11.8431	13.4856	13.2423	15.5718	10.758	8.863	12.1666	9.25386	12.1601
evm.TU.chr4.241	24.9028	27.7454	25.3757	37.1828	35.3571	37.8711	166.825	50.5367	132.915	172.441	124.926	144.186	19.6412	14.7028	12.8372	24.3954	29.7235	20.8638	75.2328	41.0312	62.8327	148.898	86.0917	125.584	4.9207	10.7404	8.28119	16.5723	25.9443	18.9908
evm.TU.chr14.126	20.3383	19.3315	17.9589	21.2041	23.4046	20.8156	18.6473	21.0288	19.1449	19.8448	19.6185	16.2494	37.8086	36.994	43.7576	46.1201	44.0697	41.9066	28.1329	32.1018	32.684	37.6084	38.2269	34.0459	64.312	16.5993	27.6013	24.6513	31.4051	26.292
evm.TU.chr3.262	52.31	48.4874	47.8212	62.0144	64.2428	64.9991	45.2691	39.1273	41.6065	52.4585	48.8891	47.6495	64.0509	74.3252	76.3834	81.2945	68.3329	110.101	64.5258	46.1504	55.7554	65.0147	58.2952	56.3753	49.4568	32.2067	29.5791	53.7157	55.5675	62.011
evm.TU.chr6.97	49.1905	49.3944	54.1358	48.0039	46.8256	46.8292	30.3801	35.2547	30.1797	30.7426	29.2411	26.4954	34.2126	37.7233	36.4514	37.9296	39.1705	35.7935	43.1896	46.2932	35.9952	31.4371	34.0396	36.3781	35.9718	56.3029	44.1834	42.7676	38.7697	42.4763
evm.TU.chr5.1020	70.3731	69.5869	74.4459	87.4313	79.4814	81.8202	62.3008	56.7548	56.7376	74.7404	57.5546	63.5027	60.848	60.1026	59.744	64.1638	64.6156	62.9276	74.6163	60.1766	70.2727	75.9215	73.1377	77.011	57.2376	49.2547	55.8842	73.5405	69.6241	68.4853
evm.TU.chr1.1327	100.139	101.915	82.4698	52.6492	57.1797	61.4458	25.3222	38.8304	21.4123	18.7432	18.61	16.2871	26.0925	22.4851	21.7894	18.9483	31.4205	25.8888	42.6326	58.4708	28.0426	33.0515	21.835	23.9602	27.1433	133.627	77.7803	73.3342	66.7196	69.5572
evm.TU.chr5.195	62.2475	66.4038	59.5788	42.2268	46.5771	50.9133	20.5716	15.7978	13.683	19.8046	24.1015	22.9108	18.2022	14.4822	14.6204	17.8533	17.4372	14.684	19.8334	22.4688	7.92742	11.3424	13.07	12.721	15.1653	35.5017	14.9482	18.5331	19.1606	15.4207
evm.TU.chr13.501	72.3677	63.9741	72.0638	71.3016	73.5127	72.1714	60.2974	58.6306	46.3844	49.4838	53.7679	53.7448	56.2891	50.4385	49.7798	43.8605	42.0338	51.1231	68.3369	64.7926	45.6086	51.7166	45.0886	49.588	49.7043	73.1847	50.8958	65.6493	59.8027	71.0658
evm.TU.chr17.335	31.3984	32.0655	30.87	28.0442	27.9707	29.0578	15.5351	21.4778	16.8324	15.6528	16.1546	15.2442	18.0588	17.0283	16.6656	19.6746	18.1411	17.1581	20.9237	22.919	20.8227	15.7387	16.2134	18.0119	18.5605	23.1134	25.23	23.285	19.7526	22.7593
evm.TU.chr2.1204	18.7112	19.0053	19.8309	15.8167	16.9872	16.5086	23.775	20.1456	21.8238	17.1404	13.3296	17.0615	21.2682	17.3735	15.4988	13.0866	13.5345	14.1609	20.5238	20.6389	20.9534	19.6571	18.3594	16.8164	33.7371	11.975	20.5211	18.2574	18.3219	19.7864
evm.TU.chr4.151	137.899	129.143	133.37	100.925	97.4864	95.4792	45.4888	49.9015	45.9498	36.2763	37.2181	36.7838	51.8595	56.1449	49.7155	44.0627	41.9121	45.319	59.8056	78.8006	58.8803	40.2498	40.4067	38.7084	51.4581	91.2012	70.5654	68.0108	52.5742	65.8819
evm.TU.chrZ.108	11.0944	11.8137	10.7795	12.7597	14.7693	13.524	18.1729	23.5714	33.5368	27.3796	23.6704	24.0362	47.6935	41.4529	38.0156	26.8006	22.5074	31.8477	19.5814	15.0116	15.4879	33.8749	37.2452	22.641	55.9149	13.4143	21.1813	14.6863	16.7458	15.5493
evm.TU.chr1.1540	6.97699	11.9736	10.0947	4.46989	4.73541	2.64158	70.9631	36.9881	51.1945	36.1054	42.3761	22.4157	68.203	62.3388	65.6866	38.2616	40.8703	37.4586	61.3871	44.212	55.0485	49.9848	54.6579	50.0127	34.8431	9.56868	23.4294	34.045	43.5547	34.089
evm.TU.chr15.145	33.3753	30.9781	33.1593	27.2552	27.876	28.8344	45.6068	49.8605	42.2071	43.2924	56.7448	45.7967	68.0422	68.6014	68.1425	84.1668	77.0803	76.4249	38.0651	46.6821	53.7346	46.8166	62.7463	43.6186	92.06	32.5109	39.7975	37.5692	45.2479	42.4747
evm.TU.chr5.205	45.1778	53.8667	72.3621	61.2166	72.0821	55.1807	46.5504	34.125	40.7008	44.3095	44.8418	35.8829	25.3524	15.0107	19.3238	19.9198	22.583	20.3624	17.9986	17.1333	20.1083	19.67	30.5952	22.6473	24.9045	20.3829	32.3056	23.2143	15.3675	17.0728
evm.TU.chr23.226	15.5261	18.4534	23.0673	12.571	18.0201	13.1016	53.5401	69.2871	54.621	33.6377	29.5621	37.829	23.6405	29.492	19.0311	17.1389	23.5002	34.694	14.7081	17.4145	15.7309	14.9676	18.2248	16.7932	15.7885	153.563	73.7654	55.9706	72.0929	63.8429
evm.TU.chr5.366	132.064	137.862	169.294	129.753	131.32	139.852	87.8023	108.398	98.578	79.8888	79.9946	76.7276	100.192	113.318	96.7111	93.4988	90.9706	92.871	123.513	124.18	122.35	78.9224	83.442	70.2824	83.742	135.824	120.546	109.639	104.968	112.295
evm.TU.chr29.23	53.6035	47.3035	45.7888	47.7484	52.349	50.4192	53.3599	58.2879	58.2435	51.3201	52.9983	54.5026	58.8221	55.0696	54.4956	60.7137	67.4798	62.2832	50.7937	61.0669	67.8534	54.9372	51.5754	58.3206	57.4012	39.5589	42.0141	41.3575	40.8628	46.5084
evm.TU.chr15.47	662.225	540.234	660.96	593.501	518.577	534.62	317.326	418.86	337.1	205.917	210.666	216.245	331.392	442.241	411.718	257.792	254.344	292.671	485.126	718.762	706.165	310.839	234.59	261.025	251.743	620.558	559.086	410.211	379.242	434.514
evm.TU.chr1.1987	28.135	29.805	29.2545	30.8252	30.9086	30.6016	20.1123	18.8412	18.1826	18.6921	16.6468	17.0158	24.1128	22.3899	26.662	24.2669	20.8734	27.7304	28.2331	29.3973	25.7532	24.6898	24.3579	24.6274	18.9936	36.9793	24.3778	29.6557	31.6644	29.5149
evm.TU.chr18.88	42.642	37.0841	36.1113	37.3054	40.5882	36.2126	18.1633	19.0442	16.7574	15.8679	21.3445	20.0851	10.7573	10.2109	12.0523	14.3176	12.5233	11.7052	18.9792	25.1505	15.5965	12.9508	13.7126	13.7341	9.93497	24.6384	14.4628	19.1141	16.7844	14.2266
evm.TU.chr2.247	28.2406	25.9267	28.2438	28.2852	25.9442	24.6373	21.4035	39.3474	26.2275	31.8028	42.3237	31.1871	81.8671	96.5081	85.5194	99.0349	84.7723	64.1716	43.0696	50.9808	55.5957	67.5923	66.2865	70.8497	125.84	40.4407	76.7149	45.9825	71.2229	46.7448
evm.TU.chr5.29	128.028	117.591	113.167	120.304	117.479	118.598	75.3151	82.9741	80.4111	76.5095	72.0467	75.0363	72.2226	81.2368	84.5489	85.4184	89.0386	88.1815	98.3756	97.9054	94.6937	90.4093	79.5904	92.9184	62.4399	96.1388	71.768	96.9812	101.173	96.6719
evm.TU.chr1.1905_evm.TU.chr1.1904	13.5851	13.7539	14.9337	12.1361	13.8261	13.8229	14.62	12.4246	10.3898	10.6216	14.65	13.2813	9.98708	12.5487	12.9509	15.4394	13.5662	13.9332	8.83549	9.45068	7.86333	10.0485	13.3308	11.4225	8.63644	19.3994	12.2456	14.226	15.1282	12.048
evm.TU.chr4.697	46.8034	50.173	53.1722	49.7697	47.2226	49.7722	49.9187	46.0588	41.6317	46.8181	42.0122	41.5684	51.0368	47.2047	48.1885	49.0672	50.2509	48.8233	52.5006	52.1526	54.6393	52.1688	48.3985	50.6692	40.4871	43.4898	42.3301	46.7128	51.2777	50.7819
evm.TU.chr6.283	38.9213	33.9336	44.1924	41.1637	42.828	37.5777	31.0487	28.3444	25.9272	25.8154	33.0485	27.305	26.7821	22.8519	25.5917	24.4879	22.6375	33.3644	21.1488	24.7604	21.1728	20.3103	19.7199	27.0415	25.0807	25.9691	25.0333	24.8177	20.3718	21.1366
evm.TU.chr2.791	20.5709	20.8679	21.2249	24.3954	24.4026	21.744	38.7489	39.9767	34.22	37.9828	34.7626	40.3136	29.6313	38.1838	27.2723	37.842	44.7359	26.3754	25.831	17.6268	17.7571	40.2139	34.5313	39.3505	26.6043	14.9787	25.2274	34.1653	30.075	24.0054
evm.TU.chr25.366	14.0978	15.302	15.1607	16.4365	18.2124	20.8801	14.4091	15.046	12.7043	14.6969	18.2833	17.866	23.7201	19.4595	19.8509	21.8829	19.256	19.7512	18.7263	13.1562	11.494	21.7992	20.3337	24.9166	31.7371	14.9094	17.2643	23.5826	23.3153	26.1557
evm.TU.chr9.92	118.434	124.494	149.573	155.398	118.394	144.099	60.4023	73.4031	79.5069	72.79	58.718	68.3232	65.1681	81.9062	64.9922	78.1932	70.5915	74.9292	111.02	104.28	126.924	69.4861	62.9077	66.5859	62.6141	116.786	111.265	108.864	76.6597	90.6119
evm.TU.chr10.606	42.8991	45.8872	42.7102	36.1837	38.5131	39.2051	40.4576	43.2957	35.157	35.8849	38.842	42.6186	42.7184	40.0386	41.5725	36.0691	38.2192	37.3403	32.9951	34.7905	33.4514	31.3252	35.0889	34.8833	36.2756	59.3639	44.3255	41.1859	47.6618	37.3381
evm.TU.chr14.135	5.68157	6.35735	5.69908	7.71779	7.71612	5.53429	30.317	28.0272	35.418	22.1251	10.729	13.6334	51.1107	52.8541	50.2973	9.96594	9.66309	14.9764	30.1354	30.2441	51.952	26.9015	32.0673	34.2326	159.525	23.3136	139.262	35.0844	53.1928	36.1766
evm.TU.chr37.23	151.673	152.425	161.853	159.649	145.376	152.626	74.5737	74.5532	73.3525	72.233	66.1907	72.758	56.6307	57.3241	53.7651	60.3823	58.1359	56.8453	90.9691	104.363	94.9055	68.9332	62.1517	63.2861	47.514	90.4119	55.9877	63.5572	57.9835	60.6588
evm.TU.chr1.51	28.7549	29.6087	27.0333	26.8012	32.0875	29.491	22.5899	25.831	24.9816	29.0838	34.4421	33.3705	26.4047	28.8775	26.8952	31.8238	38.1721	32.4362	24.0916	25.1567	19.9351	29.2955	35.6752	34.4263	24.4592	30.057	24.2301	27.2426	23.1233	26.9039
evm.TU.chr24.250	123.532	112.246	100.006	120.602	130.949	122.628	230.824	220.907	322.339	377.838	406.05	294.438	264.514	297.159	432.014	458.945	371.802	512.76	168.324	182.188	220.794	210.656	316.558	203.996	162.123	87.568	76.5356	219.436	221.812	232.462
evm.TU.chr22.68	244.283	245.54	254.344	211.771	201.915	216.826	133.297	158.462	131.759	116.288	115.562	119.261	131.332	133.707	113.06	126.282	110.587	117.653	199.241	209.297	211.917	129.469	117.867	121.479	126.88	269.566	191.968	169.362	157.197	167.062
evm.TU.chr14.312	35.4832	36.6661	36.7625	43.1436	42.6634	42.9826	51.5857	56.1371	45.3697	50.0901	41.565	54.4625	52.9812	43.9987	51.5333	47.3043	46.0971	49.5555	52.4809	43.2679	50.0941	48.9906	50.3682	48.3364	48.8794	37.4309	42.3388	62.2519	63.9664	68.1344
evm.TU.chr2.92	50.48	45.7523	42.5027	24.9746	32.5653	34.1595	50.4843	44.5102	64.1648	18.8567	16.4939	20.5159	35.0005	34.2707	23.1169	16.3422	16.7547	14.6837	25.6572	43.4947	27.5518	27.584	23.4283	29.7305	38.0022	114.179	76.0517	42.3142	67.3668	31.2733
evm.TU.Contig920_pilon.5	212.674	211.316	262.986	237.719	225.021	226.875	122.082	167.864	157.319	160.289	223.217	153.227	207.402	258.052	232.498	287.502	282.493	225.512	167.999	203.823	191.019	127.35	183.213	175.047	127.375	191.5	185.472	199.131	128.715	143.253
evm.TU.chr31.48	77.0714	80.3942	56.9729	53.2262	47.4209	47.7208	41.0492	33.5866	25.9197	27.7913	38.8092	35.6135	26.3688	32.3311	32.2481	35.0314	34.3964	34.6777	37.1988	43.7376	32.4996	29.7802	31.8369	37.6511	28.4517	77.6782	50.9723	60.3951	46.9693	53.7163
evm.TU.chr4.948	28.5752	27.7261	26.3492	28.209	28.392	28.463	22.6602	18.5735	19.1234	19.5114	21.7124	18.7083	21.1608	18.8008	23.1084	23.0113	20.4295	24.5466	21.5455	23.4733	21.1532	19.5954	19.7193	20.1923	17.062	19.6604	15.6083	17.6299	17.8063	16.5161
evm.TU.Contig171_pilon.32	17.96	17.2824	20.3038	16.1314	15.8065	16.0173	11.2438	15.189	10.4668	11.4362	11.7148	11.7766	13.6876	15.0363	12.0822	14.8581	16.4519	16.7292	13.2613	14.1658	14.3	15.8973	10.7711	12.3617	13.3207	19.4921	17.1161	17.0557	15.644	15.9262
evm.TU.chr6.450	66.7739	69.7348	70.2473	61.0528	69.0173	74.3536	33.0516	37.2228	26.3412	30.4595	36.5247	34.3346	27.4642	30.0491	32.9703	41.4036	48.3241	39.1629	34.0437	47.0869	36.7535	31.4216	46.5867	33.7029	57.9731	58.8008	34.7618	54.8127	74.3979	55.1822
evm.TU.chr10.142	12.4716	12.564	13.2749	10.2829	11.6466	9.82949	29.5814	26.3501	25.0398	32.0089	29.4352	28.4595	25.1974	23.1702	21.2978	18.5249	19.0062	20.3767	17.6386	15.7617	16.2764	19.4394	19.5385	19.8998	20.48	11.6397	21.1229	22.4253	18.0792	23.534
evm.TU.chr2.43	13.9034	13.324	14.1371	12.7948	12.8226	13.479	15.1644	16.7714	12.4533	16.4196	14.8074	19.6602	13.1705	12.5381	13.9832	12.5613	12.3791	13.2408	12.6312	14.1847	12.3378	13.3878	13.3363	13.8056	15.4266	20.3628	18.377	17.3499	21.1819	17.1507
evm.TU.chr29.67	34.0684	20.0497	31.7374	31.2988	24.9188	28.5883	56.7315	49.7979	55.6885	52.1944	58.4854	64.4925	68.1608	61.5078	54.9976	60.5729	69.6132	66.9728	30.5275	34.7731	40.9492	39.6853	45.3246	38.7704	72.8028	12.9615	26.0059	19.0115	24.5827	19.7224
evm.TU.chr12.108	56.8274	49.2883	45.9765	46.1845	49.5025	43.566	50.3186	57.749	49.9382	37.7111	33.6215	36.5089	80.2911	79.1309	91.2044	67.4843	54.7361	61.1544	75.9781	81.8631	73.2683	76.4721	61.098	65.4085	109.931	79.1927	137.577	71.3292	83.1326	78.5531
evm.TU.chr26.173	51.485	45.7738	49.1646	42.7929	42.5823	51.7882	14.1664	9.89992	11.4498	12.1156	7.86744	10.1877	3.4574	2.70039	3.0965	1.78873	2.86504	1.64137	39.2365	35.2465	15.0774	15.0633	12.9258	12.3088	2.03034	23.303	8.40971	13.1301	9.43803	6.49318
evm.TU.chr1.1541	119.516	119.45	119.484	125.098	125.705	128.456	99.5822	110.698	107.577	105.701	113.139	119.925	100.257	93.7893	100.919	101.62	108.659	91.8387	127.122	125.7	129.082	115.813	110.075	125.323	92.7075	99.7797	97.972	115.42	95.9917	103.567
evm.TU.chr16.151	160.683	142.88	164.004	181.817	126.551	173.121	138.756	156.3	129.284	136.455	140.143	189.147	140.538	142.506	130.4	171.112	157.014	155.681	145.767	160.409	157.934	143.129	130.056	134.284	123.474	146.454	173.356	167.385	130.679	153.622
evm.TU.chr3.1236	91.6851	72.244	57.2074	85.0918	85.6312	82.5081	145.088	157.234	162.198	180.086	188.345	188.151	207.715	178.205	257.03	232.382	288.297	247.654	123.522	180.889	173.165	137.61	147.527	173.383	202.599	101.272	174.559	159.221	123.426	121.816
evm.TU.chrZ.469	10.2232	10.6778	10.1317	12.8076	12.7878	12.2163	9.59638	9.60387	10.2994	10.2526	11.3405	11.4173	16.1168	13.6867	16.8307	13.8309	12.2063	15.3194	9.58865	8.013	9.42844	14.4995	15.1438	11.3357	14.7481	9.94089	9.72914	10.3787	13.0225	11.1111
evm.TU.chr3.159	31.7504	33.0439	36.8529	27.565	27.447	28.306	18.8616	14.3326	15.9489	20.0968	19.3078	18.5024	20.1638	15.7514	20.6687	28.81	25.7325	24.6971	16.5219	17.6956	14.7395	22.2287	19.4621	20.1008	24.8816	16.5832	15.161	19.1422	18.3192	17.1823
evm.TU.chr19.185	26.0635	28.601	24.7647	30.7185	28.5574	25.9917	36.8051	33.3038	31.4974	39.6339	26.0227	34.5343	23.7689	22.1109	19.7471	21.3313	22.9205	18.4277	57.9397	53.7586	51.0868	52.5583	35.2693	51.7312	27.5496	25.6704	28.4164	37.9425	27.3277	36.1519
evm.TU.chr1.1742	73.6352	74.9846	79.9865	75.8974	74.6547	76.0145	55.2375	56.6358	54.8009	53.3322	52.2501	49.1282	59.13	60.2174	57.4674	68.2366	55.036	72.2698	75.0402	65.5561	84.604	63.7992	61.8572	51.6107	44.7896	62.836	62.31	58.7354	64.535	59.7813
evm.TU.chrZ.707	52.485	47.7821	48.6154	41.2603	44.0181	39.1864	26.7862	26.2959	23.5899	22.9995	21.0022	20.3368	30.6243	28.9339	30.9961	29.8295	28.0144	29.5137	36.9092	40.6405	37.9432	29.128	22.5912	26.975	32.3839	34.4584	30.8687	34.645	31.4503	32.6674
evm.TU.chr5.290	15.6943	16.8827	16.3518	28.6666	28.4998	27.0329	42.3841	33.1739	28.5496	50.5704	34.5602	36.7581	38.9815	42.742	34.7157	36.2661	33.6909	42.2621	33.8808	30.2881	34.0886	46.0634	35.3785	41.4117	25.4858	16.3856	35.526	32.3518	33.486	29.7616
evm.TU.chr15.85	20.0885	20.4628	18.6763	24.7408	24.9442	23.6633	22.8466	23.6897	23.6913	28.8686	23.1016	23.7201	30.0299	30.5466	33.5343	38.9813	37.5808	38.2867	32.1661	28.984	29.8697	36.0685	32.5396	32.7583	27.5318	18.8907	23.0725	30.0781	33.9861	31.7954
evm.TU.chr4.110	118.697	94.2184	83.3792	74.6591	78.561	70.4247	80.0139	74.3556	78.2235	52.776	54.9311	54.4279	67.7545	78.9509	79.8441	63.5528	61.1532	76.2692	82.1705	124.705	101.966	56.017	50.8499	62.3777	68.4562	55.7448	71.1684	69.0132	61.6951	53.1665
evm.TU.chr5.53	92.1199	80.6236	81.9625	59.5837	64.4043	56.5186	38.0668	41.696	31.8502	37.8463	46.0288	39.219	44.799	49.6154	42.8798	50.4865	50.1259	49.4704	50.9418	55.6562	31.6728	45.7024	50.8693	59.0337	37.4645	86.4334	48.175	60.325	57.3793	57.1336
evm.TU.chr3.928	5.80558	5.80171	6.08042	4.06853	4.41936	3.56436	11.5405	9.94596	9.70208	10.6767	7.27416	7.5853	21.2805	26.5387	28.23	13.5593	11.7571	19.194	13.2616	10.9194	11.5708	14.0758	13.5583	15.1152	23.6431	8.02632	20.1889	28.3179	17.5277	15.7533
evm.TU.chr7.662	12.8037	13.5045	15.208	13.7584	13.6085	14.1305	14.8851	13.8096	14.0031	10.6416	17.3044	15.3921	17.8042	14.581	19.1894	21.8619	20.0884	21.9222	12.5837	13.5336	10.2027	13.3813	13.7743	13.0382	15.6323	17.2912	13.1145	14.1296	15.4428	17.7203
evm.TU.chr17.174	24.8472	26.0826	26.2343	26.6789	28.0102	26.3565	18.8075	20.385	17.0277	20.6067	23.5639	22.3105	21.6358	21.544	23.4508	22.1399	22.6401	23.8617	23.1146	26.7415	19.0513	18.799	19.4418	19.2494	18.014	28.7918	21.6986	23.378	24.1939	23.4336
evm.TU.chr7.404	215.833	188.067	230.025	203.95	194.04	179.453	131.383	165.874	169.795	136.948	121.982	118.427	119.157	123.178	108.628	118.706	105.591	109.425	235.853	222.334	271.234	122.6	100.083	100.373	134.579	225.935	225.723	178.197	153.581	140.315
evm.TU.chr1.1067	33.1529	33.1592	32.2623	34.2438	35.2318	34.5506	28.2325	29.22	31.2456	27.0747	28.5821	23.6464	31.0055	33.8426	36.459	28.5334	28.6664	32.5725	32.6538	34.0037	35.3724	28.1716	27.1441	26.8372	23.937	27.8467	29.8989	27.2444	26.8138	25.0828
evm.TU.chr2.1109	465.255	492.279	612.123	614.718	499.337	525.362	294.423	425.444	317.646	334.988	285.66	295.718	296.736	361.194	262.162	311.28	267.875	302.886	599.459	559.016	647.95	371.885	291.418	324.77	297.251	541.836	508.099	497.24	406.277	478.506
evm.TU.chr5.545	214.657	202.919	224.116	182.85	172.136	186.194	124.378	128.575	107.087	106.324	102.81	108.267	115.913	116.275	109.391	118.358	114.719	107.593	162.293	201.611	153.232	109.472	101.974	112.414	100.03	207.179	168.624	140.696	145.801	136.614
evm.TU.chr11.47	5.12724	5.58754	4.68179	5.9651	6.63956	5.69819	8.60711	8.57415	7.41746	10.3447	11.8677	10.2229	22.2893	25.8077	33.097	26.1118	21.4534	38.716	19.2231	15.6374	15.836	23.8952	23.7827	20.2621	15.3987	5.86916	5.19585	19.2426	21.0421	20.7488
evm.TU.chr2.837	33.6122	37.7527	39.4435	27.4333	26.7298	26.5894	62.2891	60.5666	58.6502	68.9003	78.0425	64.8937	25.4182	30.4439	26.9504	20.1206	16.5221	22.6089	31.1538	28.9896	30.9568	24.7939	25.526	25.2417	12.8289	50.2604	24.3424	22.8652	30.6657	23.4257
evm.TU.chrZ.832	35.9961	43.6467	38.4127	49.7974	44.2958	51.7407	116.716	97.9808	138.034	221.614	105.382	188.629	132.566	121.168	143.204	107.085	105.642	83.6875	174.543	137.918	198.065	280.848	280.053	174.613	169.36	50.7077	100.781	101.317	156.957	113.835
evm.TU.chr4.947	0.221564	0.417154	0.184329	0.806376	0.56455	0.688982	6.888	7.83118	10.4447	13.7597	15.578	15.4725	14.5709	19.1706	20.5314	27.0843	29.2942	19.2837	4.50219	3.05713	5.411	11.6897	19.0831	14.7677	14.6314	2.15539	10.208	8.75583	11.3511	8.69514
evm.TU.chr1.2339	37.1677	35.7965	37.2882	29.1423	30.8906	30.7868	19.7388	17.9454	17.4564	19.1301	18.6357	17.1607	21.0511	19.9128	20.1842	20.9803	22.3901	19.4317	19.3851	22.9686	17.7399	18.9866	18.3796	19.7792	15.4199	23.1077	17.7229	18.9186	18.0022	17.3398
evm.TU.chr23.91	147.208	146.956	140.363	134.145	140.758	157.476	60.7555	52.3735	58.2111	58.4672	49.6377	58.4383	37.638	39.3246	37.3295	39.035	40.4499	42.5423	72.2838	83.8171	63.3198	50.3172	46.8696	54.4429	37.1566	72.77	49.181	49.8625	50.5284	45.2001
evm.TU.chr2.336	130.929	135.333	149.477	137.851	121.924	127.77	82.45	89.5517	78.6314	70.8771	67.5401	73.8104	74.8999	80.1932	71.0148	71.3456	69.1647	78.3777	111.883	117.528	110.593	80.2787	70.5053	81.2187	65.1603	126.906	99.1434	93.9905	97.1604	97.4081
evm.TU.chr5.1298	164.269	162.788	167.216	126.341	134.469	136.81	107.119	100.52	126.062	80.4448	69.1276	63.0321	103.168	93.3356	91.0921	74.9151	63.8427	71.7285	133.545	164.469	131.35	71.1429	69.6234	69.0941	153.802	170.83	139.398	106.787	111.241	112.645
evm.TU.chr18.39	7.16838	7.4164	6.19041	8.7298	8.94765	8.37948	9.16552	9.81291	8.19587	11.4516	10.0014	9.95451	17.4838	14.8866	15.6414	14.5695	11.7455	16.6142	14.6305	12.7796	11.9358	17.5847	14.5301	15.2409	18.8376	14.7924	16.3063	15.4832	18.141	15.7445
evm.TU.chr12.420	193.232	204.378	211.289	196.298	168.999	167.598	133.216	149.583	144.821	100.633	114.632	85.856	113.778	129.283	103.128	56.4416	73.183	90.0187	177.123	174.015	189.084	97.2879	83.0312	80.9652	131.289	209.828	187.515	120.456	123.641	114.396
evm.TU.chr7.601	19.2689	19.2551	19.6355	22.7554	21.982	23.0471	56.5955	57.1593	54.3366	57.1829	58.0847	49.0156	107.119	99.2438	100.787	89.3846	84.632	95.2613	61.8829	48.3418	69.6331	101.142	87.9472	70.0373	79.1482	28.5986	69.2828	88.7816	78.4344	91.1163
evm.TU.chr20.47	111.842	105.955	119.164	111.645	101.964	104.162	53.9338	67.9321	68.0252	57.55	51.3901	55.3729	52.7329	57.2514	52.857	54.9918	51.6021	55.1822	82.8827	91.1672	97.2199	55.3516	49.6201	55.4379	53.663	89.0514	83.7712	72.5285	72.1429	67.3937
evm.TU.chr2.105	10.3092	10.132	10.4219	11.0274	11.9451	9.81692	16.6524	16.7251	16.2559	13.5691	18.0929	14.8668	37.8049	37.9932	54.2136	37.7959	30.5215	50.337	24.963	23.5968	22.8974	30.0764	29.1039	24.2284	34.6841	24.93	24.7848	27.9606	35.1944	29.5087
evm.TU.chr2.645	33.1353	36.5416	35.5393	46.2337	43.6634	41.1357	35.6547	28.6591	29.4552	29.5559	26.0764	29.813	27.3769	31.5831	29.8952	38.5332	35.7653	35.3037	29.7237	28.7584	36.344	37.1134	33.5946	34.3915	39.2119	20.1416	28.757	30.9741	33.0356	39.6305
evm.TU.chr7.358	6.31034	5.68721	6.52705	6.86028	6.98773	6.99504	7.70467	8.53304	6.2635	10.0798	12.9166	12.214	10.1036	9.99515	10.1243	9.58846	9.74768	9.66144	7.85341	7.6912	6.17546	8.07832	9.50146	8.28823	8.97874	7.5087	8.33414	8.88693	11.3617	10.6445
evm.TU.chr4.1018	1.38889	2.26894	2.7008	3.13375	2.57369	2.23493	11.6112	22.1628	15.0485	23.788	23.3043	33.8669	34.186	25.9743	37.7153	29.5284	63.6804	53.4373	16.7672	13.9633	22.3831	27.1302	35.2533	29.27	44.3627	4.24135	7.4195	16.412	30.6902	25.5425
evm.TU.chr3.207	11.952	12.8281	10.0396	12.5108	13.0863	12.3113	32.016	47.5791	25.8	61.1616	44.1442	87.2019	17.2155	17.9252	19.3347	27.5672	24.5075	22.8942	13.8312	17.9495	8.27929	14.93	18.5803	17.4464	10.053	66.4591	28.8441	32.6906	47.0096	30.6515
evm.TU.chr29.270	264.072	233.841	235.457	141.299	154.156	164.962	110.544	154.358	167.084	116.755	143.604	105.184	149.615	179.505	161.534	180.756	136.474	170.005	190.57	210.473	206.396	140.366	96.3438	122.392	108.63	158.76	180.507	165.456	127.71	130.044
evm.TU.chr15.149	25.3888	24.3186	22.6957	27.0437	28.605	27.8013	25.1447	24.2118	24.9103	22.2223	20.652	21.4099	27.9782	27.454	27.2513	25.4212	22.4905	21.7572	20.5114	23.0928	21.4483	22.0941	22.7863	26.0139	43.6386	20.6563	29.528	21.1548	23.2755	21.9426
evm.TU.chrZ.510	1.15431	0.562845	0.709599	0.55962	0.623499	0.66514	6.48965	5.47421	7.32895	8.687	8.78705	5.17921	24.6572	22.0243	34.7623	21.5549	14.9383	25.2947	9.11886	6.77582	10.2877	13.2188	18.1823	8.46848	2.66936	1.44047	0.380794	8.98245	17.5136	11.239
evm.TU.chr2.859	65.2848	65.232	69.2498	61.4166	60.9526	64.7365	45.1426	38.8902	38.6191	38.2913	23.5352	37.1314	28.8047	24.6542	24.3358	21.7686	21.2778	23.0286	65.669	68.3659	45.0484	38.2947	22.5969	33.4946	14.248	29.4776	25.8617	34.937	21.1965	26.4271
evm.TU.chr15.150	43.4781	42.497	38.4684	30.2199	37.7824	33.3748	51.7962	64.5635	51.1208	50.4063	46.998	58.9767	81.7819	77.7734	75.4262	78.7382	88.9407	59.0636	77.8897	85.1337	88.516	87.8572	59.7226	85.3434	114.459	61.4338	98.4878	104.24	101.858	94.2124
evm.TU.chr2.489	12.9921	13.9822	15.6539	35.7139	33.09	27.9594	113.721	73.152	105.806	86.5981	54.6731	83.4651	68.0027	71.3278	73.9875	112.449	99.2431	31.6384	117.465	92.0751	178.975	234.739	152.604	214.428	202.685	52.6772	169.098	213.591	190.632	143.136
evm.TU.chr9.53	272.123	279.858	289.896	153.78	164.271	155.263	15.1928	20.2422	14.8677	1.66187	4.16803	2.37893	4.16465	12.1919	9.23856	7.40396	5.35753	6.77889	57.9663	98.6147	8.31415	5.12171	8.30973	5.96214	0.157542	265.221	84.4164	79.3026	86.4168	41.3651
evm.TU.chrZ.336	25.7525	22.6035	24.2892	32.0854	30.2993	32.6798	21.1176	20.5397	27.8265	32.1263	18.174	28.0469	27.8315	24.779	25.8794	18.8857	18.7655	17.2079	24.3348	21.6495	18.9635	36.4816	31.2086	25.1482	32.5164	15.0799	17.2576	21.6947	27.2929	19.424
evm.TU.chr5.969	8.21496	8.1366	8.95519	9.4237	10.15	9.40115	11.9223	11.5466	11.8179	12.7669	16.8704	14.0701	25.4547	20.6535	24.2174	25.3373	21.5116	26.0366	16.0549	11.8378	15.5926	18.1194	19.9513	17.3744	19.8694	11.6854	14.8414	15.7337	16.8477	14.4915
evm.TU.chr1.1684	24.5622	24.6518	23.5428	21.7403	21.1648	20.6777	17.3752	15.78	14.3155	17.5143	13.8038	14.0311	19.2566	19.1525	21.5184	21.4074	18.0974	21.0989	19.8962	23.4179	20.0341	18.9008	18.8805	18.5273	21.4577	17.0482	17.5634	17.5761	18.6788	15.0488
evm.TU.chr23.310	22.5453	17.7829	24.3932	40.5555	21.35	47.9858	549.229	895.81	964.548	3.78992	7.53616	7.50317	153.943	184.821	54.4752	7.43386	3.01642	4.37271	1004.9	984.979	1635.01	36.7228	10.3486	35.3005	535.512	210.633	734.507	73.9862	32.4245	147.819
evm.TU.chr10.56	67.0245	66.8573	67.5045	58.7243	61.2543	69.3782	36.4318	36.0867	32.5529	40.1298	36.1134	35.4886	37.89	36.827	35.1042	42.1817	46.9085	39.3845	54.4206	59.1651	34.3542	45.0279	38.6882	52.561	32.4026	47.4018	36.5274	41.3199	40.7918	44.0545
evm.TU.chr7.390	32.313	35.2208	34.3674	32.7753	34.0577	34.8438	43.7603	48.3254	41.7921	36.5705	40.0829	35.3367	49.3376	57.0636	53.1921	59.9204	54.1657	56.0196	45.7044	40.478	47.1822	48.2862	41.9267	39.9947	44.8621	33.3341	41.8121	39.3432	43.7494	45.5964
evm.TU.chr2.581	25.1228	23.7248	22.8049	29.3673	30.4316	29.8108	21.0021	21.2084	18.2309	20.2914	25.7186	24.4728	26.4978	24.1591	28.1896	27.4044	25.5741	27.7724	21.962	19.748	18.7577	24.509	22.5781	25.2126	21.2105	21.6505	18.8397	21.8534	19.8415	21.8772
evm.TU.chr23.96	23.5645	17.2345	13.494	7.67129	16.6131	20.2855	33.4329	43.2695	40.6156	34.4774	39.4654	41.777	77.262	31.1364	66.7669	54.7559	45.9977	51.2319	39.9494	47.3202	50.0249	32.9667	34.5829	35.4485	132.33	29.4832	59.6138	40.7696	38.3686	43.6502
evm.TU.chr20.156	203.852	207.503	190.161	183.877	168.445	170.574	114.815	111.928	104.771	104.889	100.648	119.46	81.6321	96.4639	89.7693	110.138	90.0725	107.194	98.268	132.231	135.82	64.1776	78.1777	73.1405	116.788	92.0833	99.8536	104.553	72.7059	83.0237
evm.TU.chr14.193	72.1738	69.2506	70.6746	78.9143	75.8231	74.3325	53.3456	54.7311	49.0348	50.3457	52.2347	51.1479	66.8862	71.2967	77.7699	73.392	63.2967	67.7179	66.7823	76.1452	60.7727	59.7177	61.8326	62.2655	79.946	49.5428	59.4507	63.3	69.0499	69.1172
evm.TU.chr15.66	11.2585	15.1961	15.2824	25.7288	30.5748	23.041	84.466	52.3782	69.2819	106.474	95.6152	101.344	36.0626	37.1334	33.5781	65.4824	70.2464	51.1796	131.324	78.3488	68.5997	158.277	117.742	147.036	33.4609	10.3037	22.4797	49.4965	50.1379	45.5455
evm.TU.chr37.5	147.758	131.45	139.695	108.306	109.518	117.454	80.7321	91.1005	78.4164	69.1249	68.7078	75.2407	78.9955	79.6761	72.2351	72.5705	76.0913	87.4549	91.4898	131.039	119.484	68.7691	59.9357	69.5766	75.433	136.03	112.22	90.76	99.8771	90.9479
evm.TU.chr1.1340	34.7236	37.1166	35.072	42.3745	51.692	47.6411	23.5043	22.2375	23.0807	25.8469	23.9756	23.3076	22.2018	20.1341	21.1979	25.8327	26.6649	24.2743	33.7008	30.1295	21.2135	35.602	28.6774	35.246	17.5063	28.808	20.1108	34.1905	20.6107	24.7191
evm.TU.chr1.1259	18.4969	18.3433	16.1212	21.3737	21.7382	24.8746	26.5955	24.3863	24.1211	31.1493	23.4271	21.8412	28.4564	25.5644	27.8027	34.4885	29.0434	35.0906	54.1527	54.9463	67.3023	66.0732	62.5683	56.3042	23.2352	23.6738	29.3836	36.2606	32.3686	34.109
evm.TU.chr1.1544	29.622	31.3664	29.0441	25.6916	25.174	25.9224	21.705	21.0808	20.0317	15.7637	16.9055	17.3665	19.1729	18.5864	20.321	19.6819	18.1223	20.7115	22.5823	24.9373	21.5939	18.8221	17.4881	17.9158	14.7968	29.0089	20.8881	21.2737	23.9595	21.4024
evm.TU.chr30.145	63.1571	57.0721	57.2496	71.3496	70.6983	71.352	37.0992	53.169	33.2463	29.0547	30.6015	30.2228	38.5695	39.0241	36.2006	36.9793	42.1272	39.2972	44.1473	37.0659	27.2811	44.6172	42.8798	50.6051	37.3878	42.0512	30.0599	48.9131	44.8992	54.1537
evm.TU.chr14.116	15.0033	14.1788	13.2041	20.5671	22.7925	20.1117	24.7372	26.8763	21.0724	25.175	25.6567	24.3809	54.8355	41.9052	59.01	52.3966	46.9134	69.4454	45.86	34.2735	28.3798	49.0826	54.4721	39.2342	32.1929	11.3097	19.6298	41.3166	42.3427	53.7265
evm.TU.chr16.139	70.1408	65.9419	65.0999	57.8694	50.9966	58.0217	53.1885	58.4084	58.4932	57.3917	50.9072	57.5563	47.1697	58.3919	58.4289	64.8758	52.4496	54.8841	53.3752	62.2123	65.3571	51.1679	43.3428	59.2206	67.5216	108.453	76.0498	65.9422	80.0035	71.1128
evm.TU.chr24.265	47.5181	47.5359	44.7456	41.9662	40.9123	42.9547	26.9731	25.9395	23.7105	28.0984	25.8412	25.9178	20.26	18.9504	22.3596	27.4245	26.7183	25.8927	33.9708	37.8633	26.9915	28.376	26.6484	28.9431	18.8875	45.0947	27.1058	28.2531	27.4072	24.643
evm.TU.chr19.404	23.354	25.6493	26.0307	25.8296	30.467	30.7116	34.3618	41.9861	34.0373	39.8409	39.7082	36.3896	55.4935	59.9094	66.3859	49.0515	52.4905	72.6218	37.6708	32.2566	35.6486	52.4547	46.9876	46.0751	82.4518	77.1596	96.2146	92.8177	68.5993	83.133
evm.TU.chrZ.834	28.6899	29.5207	28.8242	32.0638	32.1946	32.61	33.7166	33.1066	49.5051	52.2276	31.4309	50.0731	50.2364	47.668	51.5869	37.5276	39.6807	35.2945	32.2152	28.4929	28.6376	56.2297	56.0137	33.9359	47.5195	22.3566	25.8261	29.6822	49.7765	34.1689
evm.TU.chr8.74	39.2226	35.0253	35.7314	42.0889	37.2192	36.3222	56.8287	47.7392	57.5185	55.6777	51.8803	46.4489	58.1197	40.9396	63.3183	56.2758	57.1549	60.3621	44.9442	34.7668	38.9556	54.9131	60.6741	46.0388	54.2332	17.3142	44.1264	38.4662	31.3152	40.037
evm.TU.chr12.44	5.87665	8.44918	4.51667	11.2062	11.5247	11.09	89.2175	73.1107	89.0389	188.023	143.443	169.949	39.8769	35.9078	41.2892	83.0956	106.148	79.3589	35.4571	21.1064	29.7226	82.2256	61.2624	65.9739	16.8449	13.0824	23.9705	23.5803	20.9574	21.1366
evm.TU.chr1.1130	11.8574	14.8582	14.558	13.1734	15.0906	15.48	24.7271	22.6135	17.3808	15.9311	20.156	20.519	59.0525	56.3541	29.6338	15.4224	23.1884	15.896	24.0692	22.8274	28.4773	10.4545	13.0513	11.1305	97.1247	45.0448	86.9237	21.661	25.6718	28.7972
evm.TU.chrZ.503	1.63718	1.29659	1.46734	1.45873	1.68792	1.60279	2.67436	3.61009	3.10056	3.1908	3.08388	2.52587	10.7388	11.7852	13.0006	5.99414	7.23146	9.26247	4.81224	4.5919	4.66509	5.88188	5.28577	3.24951	5.23917	2.53929	3.61979	3.37139	4.4627	3.03808
evm.TU.chr5.740	52.6878	48.9077	50.8483	46.4424	42.3585	44.3949	29.85	36.1373	34.5477	27.1181	26.3066	24.5985	31.1407	39.6838	28.0482	30.0419	31.371	30.4161	41.9447	49.0763	46.7326	30.483	26.6936	27.6635	28.349	42.6739	34.66	35.3792	31.9854	30.6482
evm.TU.chr10.16	279.894	270.458	220.276	234.103	240.462	246.011	282.729	301.74	266.154	301.237	210.317	280.304	180.272	161.018	158.164	167.417	168.736	156.047	420.815	496.991	514.001	283.705	189.48	249.119	216.21	228.156	292.27	282.873	207.081	253.683
evm.TU.chr6.575	47.3885	44.7549	47.7649	42.1597	36.8715	34.9274	26.3174	34.2814	33.3134	26.2068	23.7527	24.9199	30.2653	30.3766	29.9867	28.4022	29.0977	24.6409	38.7564	41.193	43.2005	24.6613	23.2213	28.5405	32.3446	35.4189	36.0915	30.3929	27.5735	23.6836
evm.TU.chr10.173	9.53119	9.21897	10.1721	8.88885	9.49004	9.65927	10.0058	11.4734	9.01814	8.13691	12.0659	9.4071	18.7675	14.3718	16.9562	16.4833	14.4597	15.43	10.9337	11.846	8.67932	11.6523	11.1088	9.80104	20.682	10.3047	22.7856	14.456	11.3395	14.924
evm.TU.chr2.87	47.9215	49.3564	46.0146	53.3053	53.3639	52.4096	31.818	34.3229	28.9903	31.1395	33.2698	33.3981	32.9847	34.1395	34.4887	36.9455	39.8972	34.2442	42.9389	41.5886	36.2543	39.4164	35.726	40.1741	35.401	33.8108	32.8065	38.55	39.9772	39.6511
evm.TU.chr1.2620	23.6276	23.3649	30.3078	34.0718	32.4923	30.0729	41.9271	42.4743	47.0576	49.3082	40.5464	48.85	30.0214	29.6117	28.5286	31.4711	27.6219	28.071	37.7177	33.3544	37.6133	37.9203	33.2308	37.3733	45.2325	31.1998	41.3735	34.1918	37.511	30.9752
evm.TU.chr4.57	19.4008	17.9672	18.2436	17.9992	19.2926	20.9445	17.9213	19.2951	18.108	16.4219	26.4404	17.9551	19.035	19.5018	22.1269	24.3092	21.1081	22.3165	16.9355	20.9892	18.8807	16.8386	16.8087	18.2033	18.8803	16.5297	16.7225	16.4928	14.975	15.7194
evm.TU.chr22.276	97.0809	104.662	91.7947	86.8013	87.3863	90.4195	44.0229	37.1281	35.9569	36.7541	34.0707	37.167	41.6622	37.1339	45.0857	48.6381	45.6462	45.9398	46.3087	56.9642	41.7929	34.9051	38.3625	44.376	40.087	46.3697	43.3583	41.1095	36.9458	40.9133
evm.TU.chr10.272	9.95927	9.31823	8.8318	8.84674	9.51695	9.54335	10.7872	10.9511	9.28681	6.81313	8.95237	8.48525	14.6302	14.3	16.4935	17.2674	14.4564	19.256	9.46954	8.50483	9.63605	10.7476	12.5318	9.76513	14.5789	14.0553	16.4267	13.8056	12.8777	12.6073
evm.TU.chr5.112	58.8225	58.9929	57.457	70.4131	57.9828	65.3598	38.3427	45.5127	50.1308	35.9404	35.6003	35.3857	42.909	44.8069	49.4049	42.0268	43.6646	48.6462	58.6644	54.4562	54.3093	38.2935	43.3525	36.1153	48.1688	51.4213	52.3043	47.5101	53.0009	45.2032
evm.TU.chr8.72	25.7964	28.0798	28.9606	25.8463	29.0895	28.0994	16.3134	15.6982	16.694	15.7398	15.0209	14.9387	23.4586	18.9557	21.9844	24.0827	23.3101	21.6702	17.5684	15.7887	12.7544	18.9203	21.3711	17.614	30.4109	25.2075	20.1083	16.5256	18.9648	16.0693
evm.TU.chr5.839	25.2691	24.6351	25.39	32.2618	32.9383	30.1568	42.1411	71.0043	48.9634	35.0598	37.6551	47.1792	95.8062	61.8482	53.3084	34.0992	32.6366	35.3723	43.5397	52.816	47.4422	33.7441	28.4919	33.5712	153.68	69.1961	125.706	76.2796	70.6056	100.652
evm.TU.chr4.871	7.51595	7.19631	11.0043	9.38114	10.3471	9.87329	29.2312	28.6963	23.9509	28.8759	30.7305	25.0853	66.6682	74.6428	67.6719	68.2358	55.7343	85.7796	33.7336	23.2508	42.0745	44.7263	47.8488	32.7596	37.7028	18.0013	21.8599	23.4176	35.2497	43.7367
evm.TU.chr2.1225	34.9716	34.9989	33.1144	38.5883	33.5171	34.791	35.1493	39.7307	28.3619	35.3822	27.8894	37.5884	35.7064	35.0341	40.9857	37.8292	35.9547	39.4895	39.8773	41.7889	38.0762	36.208	41.7535	36.2305	36.7085	47.7702	39.7932	40.7753	52.0508	38.333
evm.TU.chr5.285	44.6903	40.6413	39.2059	46.0621	48.5451	49.3038	36.559	37.5634	35.2575	35.06	35.9251	36.2921	42.1244	47.5396	46.852	43.1612	40.0964	46.7625	38.2242	42.7072	38.5823	33.7504	34.1767	39.0378	44.6469	41.9688	43.6194	42.6529	36.4268	39.2525
evm.TU.chr14.467	44.6488	43.0425	45.07	44.2175	47.1303	45.7977	33.2888	34.7164	33.9901	33.1297	31.4812	27.7434	39.4858	36.8165	38.7355	35.9545	37.993	39.8245	30.729	27.6793	20.181	30.3391	29.7821	31.8714	34.8936	28.6855	28.3036	34.3834	24.217	26.0207
evm.TU.chr8.392	5.23686	5.32353	4.72894	7.52234	7.75031	7.54845	6.03874	5.11132	4.39911	3.92303	4.86592	3.64429	9.44794	13.7564	11.7561	9.34875	8.72273	11.0555	3.82954	3.60614	2.39239	5.3217	8.01248	5.45504	16.6259	7.23377	7.36878	10.0454	11.1795	8.71092
evm.TU.Contig575_pilon.6	57.9799	58.2608	52.1215	42.4816	43.3314	49.458	22.8065	12.1399	7.52339	11.1177	27.2117	30.8071	5.80625	3.9944	5.5101	3.68916	7.51774	6.02916	10.2258	22.8908	4.23231	4.41161	7.63714	7.85734	0.283606	40.9457	15.9947	20.8092	20.6066	16.635
evm.TU.chr30.13	5.78463	5.18248	4.69413	5.95024	4.93099	5.16304	30.2186	24.5075	32.115	24.507	31.306	25.0312	81.3618	59.3926	90.4664	76.818	59.9983	111.743	55.4043	48.2791	62.0992	69.9536	69.6803	45.8288	24.6856	7.88781	5.58977	33.5272	44.1803	42.0958
evm.TU.chr1.754	15.0217	19.4311	21.8892	16.7877	18.0992	19.6468	24.0709	24.6171	21.0111	18.9329	22.8519	24.2386	23.9226	22.2965	27.6716	18.8005	20.4708	25.6533	17.5292	16.4031	12.5795	20.0731	19.5908	18.9332	30.2717	30.0227	23.6412	20.0039	23.3251	19.5276
evm.TU.chr7.470	175.255	191.807	255.657	148.899	175.764	195.207	183.019	123.541	46.9643	59.8733	156.812	204.891	24.8429	8.80243	7.18942	7.48705	26.1851	13.3351	37.2214	57.2474	5.91055	14.8226	46.9893	39.2213	6.39035	282.363	105.795	109.765	168.785	109.918
evm.TU.chrZ.940	3.02279	3.74955	3.13692	4.71768	4.78714	4.75538	16.443	13.3141	13.5157	15.1884	14.2082	14.5488	16.6627	15.265	14.492	19.6878	24.8405	16.5447	10.8386	5.25547	5.12753	16.4195	25.9164	18.0619	15.5281	3.11678	7.33376	10.3976	12.271	10.737
evm.TU.chr10.662	19.0657	20.4412	21.1415	22.8966	21.8181	20.6528	49.238	48.5636	40.5292	45.3115	38.1962	40.5688	39.9382	45.0445	43.112	33.6113	35.4861	35.6814	34.7977	33.0619	40.8544	40.7889	37.2501	38.2478	43.7745	13.8445	31.9693	40.8186	29.4615	29.3628
evm.TU.chr27.378	67.2612	58.7749	59.0444	52.094	55.8385	52.6538	50.5233	46.381	45.7419	43.6385	37.774	39.427	49.2011	46.4317	48.1235	56.3461	50.5204	53.4735	58.4876	71.1058	70.7752	52.405	47.2116	63.9611	46.1534	36.347	46.9913	42.6351	44.2753	43.278
evm.TU.chr8.680	38.465	45.0974	43.8343	41.5809	48.2079	47.7321	42.6897	39.834	37.8521	44.2477	47.2166	47.9908	74.0523	67.2186	64.111	53.6528	63.9761	56.8389	45.7212	41.3933	37.0308	49.0191	52.4992	48.7003	81.2457	50.7435	63.3478	59.0415	57.3295	57.1267
evm.TU.chr12.361	215.003	178.913	192.877	154.324	164.139	178.583	131.99	150.845	121.378	95.0613	101.421	92.5006	153.729	186.088	179.353	153.531	169.666	176.924	157.384	246.461	234.819	116.196	106.424	105.891	136.987	153.874	165.095	128.277	125.141	114.87
evm.TU.chr28.103	158.701	153.209	158.847	131.95	124.158	120.516	71.5031	80.2634	69.6161	78.9695	85.5748	77.047	52.2795	64.8435	57.8538	78.9461	72.7182	63.1812	80.5962	90.9997	74.1748	67.08	61.1965	80.074	69.4961	113.703	87.0662	81.7066	80.5963	67.3372
evm.TU.chr6.32	10.451	8.48649	9.39325	11.4295	11.0272	10.9281	11.294	11.2274	10.0303	10.8419	10.4486	10.1249	13.3983	14.0773	15.3836	14.5868	12.2248	15.1534	12.5432	13.1292	13.7435	14.6947	12.5989	14.4535	13.8822	8.37893	14.1071	12.2263	13.0596	11.2163
evm.TU.chr1.16	46.1946	45.5035	44.3405	48.2599	47.6308	52.5829	48.6976	44.2222	46.9679	38.867	51.3513	51.893	48.2355	42.8035	52.6295	45.5784	41.8658	50.8009	33.3191	37.2677	39.991	41.4577	41.784	40.0682	46.1036	65.6831	56.0032	43.8327	52.4263	44.6175
evm.TU.chr1.584	54.4256	54.5319	56.5544	52.6201	52.4179	50.0328	45.1714	59.4172	51.1247	45.61	45.258	41.2051	55.5516	68.3318	64.2402	54.4622	55.0504	60.5673	67.9864	68.7367	73.7815	55.9636	55.921	50.9352	66.9538	92.4999	88.0926	74.2037	89.4565	69.6698
evm.TU.chr25.44	72.2164	69.5381	69.459	72.1029	63.4736	69.701	45.589	48.5266	42.6622	40.8897	47.2146	45.364	52.8478	48.7083	48.7732	51.7448	50.0516	49.8998	46.5071	55.7963	46.6795	47.2176	43.682	49.9626	54.0014	61.2704	49.9268	54.3888	52.8511	51.0343
evm.TU.chr15.39	52.3665	50.6929	44.3714	50.0085	51.0042	48.683	29.7228	32.7598	29.7329	27.8162	29.4733	26.8324	42.2955	37.654	43.7172	39.6986	43.9771	47.0844	46.064	58.0727	50.1075	35.9557	33.9592	41.706	38.4357	58.3406	46.1602	57.208	44.3765	66.1454
evm.TU.chr16.395	31.4454	31.5455	31.5158	28.5752	27.6805	29.6596	15.1924	16.1103	16.6612	12.1357	13.9624	12.8237	11.0342	12.7711	13.9836	13.2391	12.6698	12.6723	14.6577	18.8916	11.0206	9.40927	11.2503	10.0203	11.2446	35.3584	20.6135	19.201	18.7042	15.2785
evm.TU.chr4.6	26.4653	23.4905	28.0024	14.7634	19.1569	18.4582	36.2743	42.4259	43.7261	16.6017	27.0482	31.7037	77.7184	74.4855	53.5654	61.4584	84.5817	45.6701	64.9072	58.0029	57.7111	38.0933	44.5934	45.3162	58.6294	20.7611	32.4344	30.7362	28.2504	20.4844
evm.TU.chr5.67	18.2418	25.287	19.3913	33.7219	24.8923	24.9697	71.2257	52.1935	61.589	63.9163	55.2677	44.9188	93.4719	108.625	95.3492	84.0871	75.4402	125.689	49.7519	41.8927	66.1858	51.235	74.9031	55.3746	87.551	19.8911	59.01	70.4097	59.1362	62.0395
evm.TU.chr29.288	11.259	10.8665	9.5362	12.0275	13.2721	13.3592	16.515	14.5798	20.6361	16.99	18.5454	21.4644	23.4155	16.4499	21.202	22.1946	25.9535	26.5157	12.7771	13.2967	13.195	19.7614	16.3443	16.954	24.1309	9.4125	13.062	10.0397	10.2149	9.3658
evm.TU.chr14.72	203.223	198.002	190.167	210.019	168.814	205.647	93.0876	86.3706	83.8141	89.3508	63.8769	66.2698	52.4612	53.6564	49.435	52.4447	46.958	50.4401	175.375	207.758	184.057	84.0371	62.7934	84.3171	49.2945	113.916	88.9536	74.6999	79.5155	69.3628
evm.TU.chr12.448	14.822	14.5627	13.7707	16.7638	16.2029	15.2931	16.6253	16.208	15.8466	17.9833	16.9732	19.3623	21.2402	20.0408	20.6497	20.7215	20.6887	22.2153	22.3407	17.3227	17.8658	23.3092	19.1691	21.2153	15.4587	12.784	15.9435	21.7318	18.5263	20.3574
evm.TU.chr11.493	97.5207	92.9498	80.6368	74.4168	72.3941	68.0912	51.3815	49.1747	44.5007	43.0602	43.765	43.5555	44.0873	40.2505	44.0169	40.999	44.653	43.9567	56.0505	67.8072	60.706	38.0599	43.5397	45.5082	37.3017	68.9985	48.6195	51.3716	56.6531	53.8418
evm.TU.chr21.19	31.6436	31.101	32.0793	29.867	31.0342	35.1012	30.0904	30.668	23.6865	24.1804	26.02	27.7756	30.85	28.2619	31.3942	26.1096	28.3671	29.1731	32.4658	29.9301	21.5545	28.5187	28.569	29.1165	26.2357	43.6109	32.2717	39.5427	38.4069	33.1839
evm.TU.chr6.458	29.3307	27.3655	30.4866	37.6007	34.8564	35.6993	37.8192	30.1572	35.7945	40.0591	30.635	37.8918	21.7112	20.9843	22.4502	32.8195	30.6759	27.2813	42.7108	34.3868	39.224	34.2688	28.1642	34.8321	25.5589	16.5102	24.8266	29.4447	25.8462	24.8931
evm.TU.chr3.403	52.9049	50.8465	52.8627	49.5633	51.5457	50.3526	46.9322	42.4426	38.6757	39.2873	36.6629	34.9966	67.6218	62.1914	77.0144	69.6411	61.7794	56.5513	50.6799	57.6063	53.9468	52.1752	60.2483	49.1076	48.1228	53.3278	52.0805	53.5504	54.1354	46.9992
evm.TU.chr4.832	13.7745	10.0317	8.53603	16.4204	15.184	15.2245	84.2822	68.6698	71.5926	100.487	83.1594	73.8102	285.816	211.61	375.01	268.486	190.432	415.675	129.703	91.6702	177.762	190.117	160.528	170.777	36.4056	19.549	25.3676	177.234	178.664	182.816
evm.TU.chr27.395	20.7203	18.5073	15.6482	18.9469	20.826	18.7679	11.307	13.0268	11.9269	12.231	14.3574	12.7275	13.1563	13.1716	14.6837	15.5406	15.1447	14.9832	14.2095	14.9486	9.95919	13.7219	13.8774	15.6139	16.3123	12.7863	13.3291	16.0207	13.0716	13.1997
evm.TU.chr6.255	11.0512	13.0303	14.0519	12.8879	13.349	13.7689	18.7164	26.355	24.3448	20.1465	25.4049	21.6076	51.6761	36.0065	30.1033	30.6915	34.5596	25.414	21.81	15.1605	12.1736	21.3311	28.3227	26.6594	38.9967	11.9401	36.2919	26.3838	23.1817	22.3503
evm.TU.chr1.2226	15.2718	14.4505	13.0499	14.3703	14.3805	14.1719	12.1839	12.2803	12.0805	11.0063	12.8052	13.0349	12.5853	13.5833	14.5392	17.5401	15.6849	15.1903	11.8511	12.3671	11.4843	11.7657	15.1496	12.4396	13.9344	11.8764	10.4299	11.0786	11.0871	10.4993
evm.TU.chr13.438	115.49	111.454	106.948	96.0243	97.2461	99.9486	27.5315	20.6667	12.4602	16.5904	30.8386	27.3621	6.31411	4.78867	5.50217	5.87361	9.02945	8.21861	32.1921	58.442	12.1155	5.9434	10.56	9.25878	0.033556	133.383	46.9282	43.8689	54.2299	35.7505
evm.TU.chr5.544	62.2109	64.8942	52.5765	43.7563	42.8121	36.1153	51.8284	51.7413	45.7847	38.3352	52.1508	42.3571	123.343	85.7576	87.1881	60.5419	66.9158	142.672	67.2095	77.5845	79.9894	100.932	39.3441	63.0685	96.544	80.0635	100.236	56.402	66.6601	70.0397
evm.TU.chr10.176	27.361	31.793	28.4314	29.5814	33.0852	33.6281	26.8683	26.4533	22.4187	22.5492	27.1463	23.9599	26.3558	23.8026	34.0261	30.4613	26.9932	36.3666	29.1609	29.0584	28.0934	24.5048	26.0753	26.2379	25.7406	30.6728	35.5284	25.5471	25.2854	27.8475
evm.TU.chr29.149	129.852	139.728	144.513	136.511	120.579	152.539	89.1485	89.376	86.6101	87.7154	90.1741	77.2567	85.46	82.3326	77.7984	86.234	95.6767	93.4345	100.146	119.765	95.569	82.9567	83.0667	97.6866	78.3132	107.918	89.6645	89.6141	80.4592	81.1319
evm.TU.chr27.281	216.748	197.688	183.059	117.681	111.109	109.809	42.6307	32.6688	16.3637	21.8071	25.8176	24.7645	6.06883	5.07689	7.01452	10.4845	12.6997	9.74272	26.1958	47.4425	14.9516	15.726	17.6101	15.3345	19.8295	95.0872	53.2864	38.2512	43.088	30.8711
evm.TU.chr1.2845	128.657	131.251	153.028	129.336	118.98	127.371	88.0027	98.479	103.843	84.5729	92.6939	74.0695	111.299	120.087	110.728	108.974	120.996	108.53	107.276	100.457	114.04	90.7075	100.432	83.5989	86.6641	109.527	98.9696	101.877	105.961	103.41
evm.TU.chr1.452	5.13272	5.77256	4.19097	5.64964	4.85243	4.50956	23.7556	19.1085	20.4862	23.5879	15.5504	16.3834	42.8309	47.3726	56.1827	35.9813	23.148	46.4569	26.6985	20.6516	31.7781	37.8371	36.8721	32.4209	17.8103	4.33131	11.6592	22.0951	32.3268	27.8892
evm.TU.chr3.1661	73.3554	67.6764	65.6825	59.5628	58.0533	57.5417	58.2619	61.2534	59.1095	36.1556	46.5538	35.9151	81.8615	84.1495	76.8354	43.7329	63.1349	59.5757	59.2179	57.082	70.0171	35.5199	53.9428	37.5595	115.551	83.434	85.8648	57.4495	75.1039	64.694
evm.TU.chr5.728	71.8152	72.9841	69.1505	55.1638	58.1794	53.3463	29.907	15.2354	13.7276	14.6131	20.7494	26.6944	9.56003	7.80496	6.92289	10.0772	10.5292	10.6732	17.0671	29.3213	7.58258	8.09225	9.96299	8.04188	17.9323	105.61	44.6461	33.2557	39.5632	21.8146
evm.TU.chr12.413	18.1071	19.7027	19.7181	16.2309	20.8102	17.3698	33.2538	27.3173	22.9306	25.8335	26.6783	27.018	51.5807	48.0197	44.1773	33.7934	35.4607	37.2179	24.8703	16.5563	10.2909	31.1858	37.173	30.7157	52.4458	22.291	30.0056	39.0122	31.9561	40.6138
evm.TU.chr1.2727	120.006	127.812	141.344	130.455	125.936	125.415	84.4747	93.9042	85.7902	80.065	69.3757	76.9688	80.1933	88.3	78.4381	82.3208	76.7757	79.813	109.511	128.272	122.437	74.5426	79.3107	74.3367	80.1975	126.565	96.13	96.7778	99.5483	107.785
evm.TU.chr27.377	87.4335	87.7828	88.7501	77.093	81.9953	71.8116	58.5416	59.3269	48.87	45.0466	43.1674	51.3612	41.7312	44.4892	46.5519	47.4812	47.2527	48.8927	54.7448	67.9008	51.4197	43.247	36.9511	45.1941	44.7414	84.6998	63.3111	61.3617	60.6704	49.884
evm.TU.Contig920_pilon.2	66.917	68.272	67.2502	62.6207	59.2315	63.5738	59.7763	58.6791	63.9996	56.0847	65.921	62.6676	82.3443	77.3769	82.3515	73.0392	80.8634	86.0361	61.8784	63.9318	61.8641	69.4352	70.3951	68.0625	80.605	57.9357	63.3499	66.5135	63.4053	60.7651
evm.TU.chr18.79	31.2256	30.7182	36.3054	33.8158	36.6439	35.6132	22.7869	26.6502	21.6723	22.6269	21.2601	26.7575	18.6153	20.1923	16.2769	17.0659	18.4163	19.5723	26.4877	24.1333	20.5125	21.8508	18.9602	21.5817	15.5407	38.7562	29.0849	29.9515	28.5928	29.2424
evm.TU.chr18.408	18.787	19.3633	20.2786	20.337	19.6155	17.5518	12.8144	14.3176	13.4008	12.1344	11.7872	11.8271	13.985	14.187	14.3813	14.3839	13.6336	15.0569	16.6684	16.3207	13.5155	13.1501	13.1055	13.5201	13.5129	12.9643	14.156	13.7721	12.1824	14.0232
evm.TU.chr1.2519	20.558	20.7184	21.7607	20.3935	19.7524	19.9118	23.1451	20.7772	19.184	20.6525	18.6025	21.7883	17.0356	15.8696	17.2868	20.1346	20.4084	16.5661	21.4381	20.5924	19.1514	17.8699	17.7255	20.0274	15.5601	29.1222	20.0866	21.1783	22.5437	20.5312
evm.TU.chr12.140	3.67927	4.38827	3.18505	4.76565	5.12295	4.39056	9.36667	11.0181	9.44681	10.4847	8.49814	9.01169	25.5074	20.7401	22.1355	16.9625	16.4444	19.6369	14.2479	10.3005	13.3798	21.1282	19.3537	20.4286	20.9115	10.6065	19.2594	35.5392	27.2898	39.9241
evm.TU.chr19.95	27.1154	27.7932	24.1676	36.2337	37.2335	40.6946	36.4498	40.0505	38.6455	37.5125	52.5923	43.0526	34.5772	27.6812	26.9228	38.7417	37.0883	38.8667	23.064	23.3986	29.7338	32.4554	30.3386	32.5909	18.3648	13.5821	13.6118	21.8333	16.9328	25.351
evm.TU.chr4.824	15.3059	15.1054	11.3362	15.107	17.2149	14.3288	21.3845	34.1822	28.5631	29.4542	19.436	23.6987	152.363	152.706	154.154	124.987	106.212	165.349	113.876	61.1927	126.903	115.82	90.0529	82.0861	22.0266	13.0534	15.6815	79.9833	123.367	114.11
evm.TU.chr26.322	18.7747	19.8067	17.4893	21.6364	20.8705	21.325	18.2137	17.1524	16.9328	16.5609	18.6253	18.2786	20.3385	17.5192	20.5356	17.7858	17.941	22.0605	14.8131	14.8697	12.3736	15.079	16.4501	16.7347	25.1739	14.853	23.1929	18.4347	13.8982	16.3396
evm.TU.chr9.184_evm.TU.chr9.185	6.2777	6.35173	5.79874	7.08687	7.92817	6.55291	9.40972	12.8071	10.1046	9.33198	10.8248	9.81692	21.3442	25.5942	22.188	26.9512	30.1377	21.9447	8.76067	6.294	8.08295	13.005	16.6202	13.6456	23.7049	5.98904	14.915	15.8642	21.2497	19.4217
evm.TU.chr5.50	50.4541	75.8575	49.4776	53.5009	45.1256	54.8656	33.0947	41.9129	43.7488	36.6987	47.0323	37.1275	61.0736	63.9627	66.2596	70.3562	66.6124	94.5538	39.8416	55.1861	52.1685	55.123	48.8725	47.5574	33.3586	52.5278	32.9932	41.463	54.6012	52.0994
evm.TU.chr8.165	26.2709	25.1034	28.7481	28.5459	27.7765	28.8736	45.8874	40.752	39.9958	37.6328	35.4732	35.9385	46.0048	51.1343	52.3502	52.0343	48.3904	48.3814	33.3104	30.1699	39.1903	42.126	44.9755	33.5518	37.3543	24.7009	33.5871	33.7242	36.2599	34.3656
evm.TU.chr12.417	107.028	120.653	108.4	113.045	114.208	106.117	181.318	174.467	177.218	164.292	139.431	151.608	141.233	143.826	146.656	132.576	130.084	130.925	143.644	130.355	164.978	135.479	136.549	136.656	164.236	55.3949	112.437	104.354	103.827	94.4852
evm.TU.chr8.386	18.5801	17.5835	17.7623	16.4265	18.1382	15.4705	15.2786	16.9943	14.1802	13.9792	12.0918	13.9826	15.4489	15.912	14.7684	13.9172	12.7399	14.7149	15.7664	16.5177	13.4364	15.0651	13.7426	14.3642	16.9628	16.2419	16.8671	19.3091	14.733	17.3348
evm.TU.chr29.57	30.8436	31.757	30.1228	44.3529	43.6485	40.3161	33.9758	39.7063	34.8057	37.9485	59.9089	50.7149	39.3142	42.987	51.8188	62.9613	53.4995	69.3775	43.5548	35.7816	37.1827	46.1604	33.8039	42.6485	39.436	33.0359	33.8778	31.7375	29.7399	37.4439
evm.TU.chr5.226	25.017	26.7968	29.9352	17.3969	18.275	20.9083	25.9743	24.2135	25.0309	16.6682	20.4178	21.2874	28.5514	21.4221	30.8225	38.1535	31.6799	37.1486	18.7833	18.0849	17.0004	20.2945	26.6894	19.1982	21.8631	50.4612	30.0912	25.6406	33.2808	23.6526
evm.TU.chr3.452	26.4581	25.3627	27.4625	27.9164	28.7008	27.1981	17.3042	14.9256	15.4024	16.6746	11.5538	12.8157	17.5473	14.585	15.9226	10.5211	9.85746	12.5141	15.0226	16.8455	17.3004	13.6929	12.7472	12.1506	10.4174	12.4345	9.51972	16.2261	13.9178	16.9358
evm.TU.chr26.90	77.3669	80.9912	77.6579	74.7285	68.6085	75.5141	37.0756	40.9083	34.0145	33.6053	30.7673	34.3453	29.6569	34.8119	30.6201	39.3492	33.0353	35.695	53.4073	59.4647	42.8225	35.8434	30.0405	36.9857	31.2219	65.1212	45.0726	47.1205	46.8286	41.2584
evm.TU.chr1.1346	82.8694	78.0652	84.8173	89.784	82.2327	78.8302	34.4356	31.4127	28.0343	36.273	31.5503	33.4371	25.9644	24.6627	22.9666	29.2055	32.7987	26.5347	55.5216	46.9671	36.8118	31.785	33.3821	37.6162	33.8917	50.6611	29.232	34.415	44.292	37.0025
evm.TU.chr1.1272	7.80015	6.27493	7.12677	6.76649	7.46878	6.45579	5.41291	5.16395	4.40779	7.86709	8.68338	5.77836	11.2902	9.50641	16.4435	16.1999	11.5656	21.0301	7.99662	7.195	8.05633	12.238	15.1577	9.03379	3.94215	4.39677	2.51015	9.97973	11.1858	11.4727
evm.TU.chr30.35	33.3954	31.8513	27.1923	23.6635	20.9133	31.7903	25.4703	22.7489	29.6193	19.186	22.5231	21.395	22.6728	20.2141	26.8377	19.4357	21.5915	22.3907	18.6675	23.3849	20.0439	18.4008	19.3298	18.8777	21.3014	18.8684	26.8254	22.4305	16.1505	17.9912
evm.TU.chr2.1299	31.7378	35.5988	40.1523	34.7995	35.376	37.3166	41.2417	39.6082	44.6457	27.8377	28.399	28.958	55.6549	47.5926	47.9948	51.7774	46.258	46.2639	43.1486	41.6648	43.5806	35.8039	37.5439	34.9952	58.7718	24.8072	40.9266	27.9153	25.3429	32.7556
evm.TU.chr6.675	20.6816	20.3044	22.6949	18.808	19.0747	18.7309	17.2836	18.4079	15.6878	15.6438	11.4151	13.4487	20.4992	19.8001	20.7968	14.0854	13.5917	17.316	17.4643	17.6944	16.6722	18.3908	17.7053	15.2834	16.8383	26.3884	20.1805	24.9129	20.7534	23.5012
evm.TU.chr27.117	282.368	206.035	283.835	279.113	245.343	257.632	179.762	195.311	224.034	178.51	196.038	190.414	198.467	249.038	183.101	235.044	192.35	240.567	322.058	366.449	415.567	276.994	206.751	225.088	165.571	252.547	224.101	203.24	203.622	208.785
evm.TU.chr27.389	35.9446	31.4916	29.6296	36.4553	33.9709	31.6511	23.3082	22.4401	26.496	25.7377	29.5792	28.1366	26.2248	25.8537	29.9013	36.557	32.974	31.1618	22.8875	28.567	21.482	21.2942	26.5291	26.4122	27.4507	27.4991	21.9376	21.0554	24.942	21.0936
evm.TU.chrZ.634	27.5979	27.9163	25.7591	22.628	24.5384	24.929	21.2759	21.0628	21.9143	24.8024	19.4203	23.4092	22.3123	24.5381	24.5412	20.31	19.8341	20.3613	22.6259	25.0701	20.8504	23.664	24.0172	17.6283	23.5272	24.389	19.384	18.4881	31.2177	19.7251
evm.TU.chr23.341	66.7476	69.8724	76.0582	66.9147	61.4919	68.4996	46.6794	52.3854	52.5074	41.2854	45.5064	45.7735	45.0316	52.2553	46.6315	51.5671	44.7503	48.6657	53.1489	57.2684	56.4706	44.3954	42.1971	44.7752	55.9546	57.1073	67.6267	52.8777	47.9575	58.1017
evm.TU.chrZ.726	16.7586	15.3878	14.8059	16.8917	18.4393	17.2522	23.3098	23.4574	21.7399	15.1816	18.1576	16.6713	37.5022	34.1431	37.56	23.5223	21.623	28.8707	30.7382	30.6748	30.4489	24.3003	20.0715	20.1707	55.2943	27.3433	47.9	40.1783	29.5453	30.2812
evm.TU.chrZ.242_evm.TU.chrZ.239	18.5333	19.9008	17.4853	22.4793	20.1303	22.0875	30.7743	23.42	36.5737	35.3351	20.0505	31.1123	36.589	37.0029	43.4615	24.3447	26.8837	28.795	20.4977	19.2945	19.9234	30.4253	24.0399	21.3099	23.3529	15.9857	15.406	16.7239	29.1697	16.2581
evm.TU.chr3.1314	164.283	175.28	249.898	256.473	219.225	239.994	96.2407	120.502	94.2679	96.7216	90.4111	106.006	69.0956	82.8073	66.5521	63.7403	65.2415	63.0245	152.837	152.553	162.683	77.0345	70.8247	85.0282	73.8149	260.932	177.962	150.508	119.406	124.984
evm.TU.chr29.84	119.694	112.828	120.678	100.73	115.453	114.832	182.513	134.868	76.7727	255.258	362.232	373.101	54.7081	20.7827	15.4098	29.6215	62.1049	42.2696	45.7574	54.0547	19.276	34.1543	103.636	72.3434	0.0424232	217.123	90.0328	116.112	128.952	103.881
evm.TU.chr13.92	110.06	129.938	130.441	121.673	121.157	115.879	112.639	148.218	152.445	128.535	108.999	125.223	151.742	164.525	126.548	137.147	167.088	117.544	148.061	152.528	185.409	135.072	95.9173	162.041	296.823	107.01	218.342	154.101	121.942	155.254
evm.TU.chr7.568	138.064	124.674	148.698	132.612	140.43	121.129	104.078	146.895	109.556	102.512	94.1053	104.597	123.372	135.114	119.073	108.222	109.849	102.593	157.169	133.835	124.434	116.286	90.6749	103.451	194.377	148.488	165.279	140.431	139.992	155.648
evm.TU.chr9.274	16.1942	13.5473	16.3587	24.3455	26.1342	26.5077	32.9021	51.8519	36.6284	37.2029	42.6875	33.3737	53.3799	54.3038	48.609	40.3369	54.9687	60.1049	43.3275	26.4198	29.3202	62.9535	38.2496	36.6917	77.9748	33.3561	73.8783	61.6063	41.5274	63.8268
evm.TU.chr22.181	25.346	25.0522	22.1615	23.5808	23.7113	24.5225	19.3218	23.5995	19.8397	18.6238	21.9179	22.7116	21.9374	25.9039	32.6723	30.5457	32.0587	28.7838	20.1227	23.7082	19.6128	17.6289	21.2754	18.2281	15.5746	32.717	20.2277	21.6034	25.8468	19.5442
evm.TU.chr7.107	184.996	188.985	144.65	196.37	174.068	163.888	152.123	135.386	190.056	117.919	165.561	120.666	155.865	168.272	165.694	205.901	190.782	163.699	180.898	221.33	220.095	140.133	159.888	177.158	173.626	112.555	180.192	159.094	135.026	115.032
evm.TU.chr3.425	36.8264	38.8536	37.3333	34.125	35.9615	34.5973	31.6135	26.66	24.8361	23.0606	22.6177	25.3449	30.303	33.4641	40.8974	33.2411	26.1488	32.9975	25.8809	31.047	23.0562	24.7003	26.0527	24.7718	26.3848	45.7839	28.3669	30.8722	35.8757	30.1677
evm.TU.chr9.225	112.873	130.161	105.933	151.392	147.815	158.595	174.249	205.515	136.748	169.742	166.016	178.369	151.752	175.435	152.34	130.063	165.902	165.059	153.476	133.397	131.401	150.731	156.421	127.755	160.18	193.481	215.426	176.123	167.816	172.027
evm.TU.chr11.458	13.4775	13.4537	13.5225	16.0733	16.4533	16.4924	13.6976	14.295	14.2446	14.18	12.1205	13.5879	16.437	15.0583	17.1287	16.6586	16.5227	14.6007	11.8827	11.4081	11.3854	14.4405	14.4434	14.9554	26.1897	9.77573	28.0822	17.1358	13.5536	18.7054
evm.TU.chr5.1181	712.174	622.224	660.259	610.006	557.951	606.371	391.31	329.226	306.397	385.969	292.345	373.311	224.778	163.756	158.841	229.488	215.205	184.799	429.01	613.964	598.033	260.51	200.824	283.216	208.584	388.237	248.445	259.354	296.903	285.394
evm.TU.chr25.207	14.3132	13.1334	13.2979	15.8975	19.1289	17.2468	27.9553	25.284	29.1871	28.002	29.5081	30.9115	46.1159	37.9768	55.4871	54.5717	43.8106	65.7908	50.3621	33.846	35.8483	72.9229	59.3033	40.1973	43.7824	14.5271	28.6269	36.1051	35.8769	39.4385
evm.TU.chr5.542	17.5145	16.312	16.3629	16.187	16.6086	16.3158	15.4017	12.2533	11.4631	12.2164	13.8697	11.868	17.0951	16.0679	24.5861	20.1762	17.1499	20.2916	13.443	13.9601	12.0887	13.9283	14.7585	13.4948	13.7374	9.28439	11.111	11.9902	12.3845	10.8734
evm.TU.chr26.17	123.961	115.148	130.482	118.33	105.249	107.738	65.7052	88.6345	68.7108	67.8309	61.6713	65.2732	64.9776	60.8704	57.6294	63.6586	57.5821	59.7248	118.228	123.58	110.859	75.8386	57.7711	71.3679	60.0508	106.916	80.2102	79.2085	84.2415	81.8818
evm.TU.chr23.280	21.7462	21.0935	21.2773	18.5008	22.1411	20.0346	29.0555	22.2595	29.0779	10.8657	14.3207	13.0265	12.242	17.261	10.1967	9.45873	9.44098	10.5147	19.55	21.2351	19.041	9.03598	8.60088	14.9639	41.6657	11.6864	31.3887	12.8161	8.18647	10.2732
evm.TU.chr21.30	19.7274	15.093	18.8391	16.3732	19.0536	16.3118	31.5377	29.7097	26.1813	17.1092	20.4012	25.1458	28.8398	25.7253	24.8969	22.2025	24.9293	18.63	18.2735	16.928	13.2088	15.8097	19.3699	21.0857	30.706	60.4652	33.7027	22.5752	33.6198	27.02
evm.TU.chr28.259	16.4138	15.6563	15.1228	17.9512	17.6142	16.2792	11.6137	11.6604	10.4957	12.3499	14.9781	13.2149	15.6808	16.4361	17.1717	16.3923	16.1743	17.7506	12.7659	12.2596	9.40237	12.9762	15.0582	14.2595	14.9397	13.8751	11.8858	13.8821	12.5435	13.2696
evm.TU.chr26.311	56.703	49.802	57.0099	57.679	57.9924	56.7861	52.2119	74.1236	81.9315	55.6758	70.4849	64.4873	78.5069	99.7971	105.984	103.252	89.3267	102.648	78.5241	97.4861	110.041	70.4136	56.5943	68.2563	84.1886	56.593	71.4917	76.9142	64.4832	65.943
evm.TU.Contig143_pilon.3	188.223	177.361	183.572	161.095	153.844	156.278	103.979	97.0595	0.253597	0.0396318	67.0949	0	0.150518	0.0650851	0.0869866	82.2816	75.9626	88.8643	140.036	163.615	130.829	0	0	89.9454	0.190981	147.882	91.0113	106.58	0.170053	102.247
evm.TU.chr26.320	38.77	37.6401	37.4017	37.4427	38.0939	36.4216	20.7909	25.4319	21.9595	19.8884	22.9456	23.7154	22.809	23.6657	23.479	26.3141	26.5123	28.008	28.5567	35.1906	25.7167	22.3762	20.9152	22.3997	22.7398	35.5482	28.5055	28.2554	29.0477	27.0575
evm.TU.chr20.110	46.1669	46.1172	48.5937	38.9194	41.8045	45.0544	15.9458	15.3619	12.6212	13.6613	15.0079	17.3393	15.4625	14.894	12.6612	14.8034	16.3811	13.7524	15.6403	18.0292	8.61585	11.0433	13.3938	15.37	28.8919	32.4864	16.7667	16.6683	14.0178	15.6578
evm.TU.chr24.27	13.0716	12.9667	11.4482	19.2995	18.3856	19.1891	25.091	18.0197	22.3777	24.911	25.1545	26.0331	13.825	10.5334	12.4721	13.3101	14.8472	14.6929	17.8245	13.1578	16.9718	21.4933	19.5768	20.0916	9.14491	4.90472	7.58702	10.9089	13.154	11.4741
evm.TU.chr1.2283	121.918	121.573	139.331	101.518	104.352	105.918	67.323	82.5586	69.036	62.1826	60.4806	63.0483	70.1478	72.191	64.6828	54.369	55.4782	57.4327	88.2695	98.8902	74.0347	54.5229	56.6879	60.6578	70.6899	139.897	99.6038	87.1685	94.6616	88.8038
evm.TU.chr6.297	40.7664	38.5097	38.6693	40.652	44.5548	42.7355	45.4027	52.0596	41.5397	45.7297	47.1841	49.0141	59.1158	57.1286	56.2901	67.6198	64.5228	61.376	39.4775	35.8127	34.9257	50.8576	51.9122	56.4708	65.2414	39.5736	55.6032	63.6129	53.3686	74.2948
evm.TU.Contig171_pilon.13	22.1054	22.6488	21.8954	19.2104	18.911	18.5719	12.0353	11.621	11.4836	11.2038	10.1524	11.3185	15.7825	13.6146	16.4487	14.4251	14.7824	12.6898	11.4481	10.4966	8.28346	14.437	11.618	14.6308	15.3533	19.4316	16.1038	17.7112	16.6146	13.845
evm.TU.chr7.484	1.42651	1.32947	2.68148	1.90364	1.7436	3.23146	48.4513	25.1074	67.281	119.853	55.8205	39.8086	155.689	162.631	468.049	341.388	566.013	102.274	286.805	117.066	285.943	227.311	131.892	313.135	37.157	26.8451	40.0908	151.25	39.9558	163.495
evm.TU.chr3.23	48.8012	47.3793	45.9881	43.7523	41.6077	43.8308	78.7457	68.4476	68.1593	65.2581	69.8872	83.0555	117.915	66.3868	101.888	82.3422	90.4164	92.4932	55.768	63.7065	46.5831	56.7688	67.321	62.9553	134.119	45.0846	91.9033	237.494	100.301	168.462
evm.TU.chr2.801	20.0997	25.7894	23.6684	27.3266	33.1733	27.9016	46.0035	34.8508	38.5057	60.6094	45.548	49.3197	113.547	102.453	102.187	58.5876	77.2176	51.8209	74.5932	49.8862	30.1727	98.6174	101.493	97.7867	115.037	36.0846	96.3849	154.579	100.234	103.432
evm.TU.chr19.40	71.9242	82.1614	69.2736	57.3806	50.5966	52.195	55.7382	69.1022	58.3166	57.9091	53.9388	61.1598	79.227	93.7198	81.2116	96.7777	90.1356	64.9856	85.6663	93.0066	100.48	70.7065	72.4417	76.8185	92.3928	110.57	111.584	88.8688	93.1583	88.8347
evm.TU.chr7.701	216.67	219.759	226.438	241.257	242.947	251.846	212.506	240.98	236.257	212.282	183.567	242.283	159.492	197.779	155.994	179.664	167.945	156.115	230.235	217.28	233.889	178.009	161.628	176.747	220.167	232.539	210.926	243.703	188.21	233.04
evm.TU.chr27.388	40.336	38.2538	41.1912	40.4531	38.5418	36.9101	22.9992	26.2081	23.9182	21.2927	26.5205	26.1254	36.3145	32.7344	32.5971	34.7837	34.5493	37.385	34.2317	33.5877	31.9212	28.9737	25.8111	34.6564	31.2968	32.5923	28.5459	32.91	29.8577	30.3739
evm.TU.chr12.438	84.9726	87.7369	94.8124	102.606	110.653	104.115	74.7047	99.8336	85.0994	71.6914	52.8081	57.7125	86.0086	97.0495	80.1836	71.4349	71.0795	85.6572	121.389	108.337	106.09	99.6018	74.2711	89.7143	110.716	75.2581	124.081	98.2561	89.7039	112.441
evm.TU.chr11.489	67.5581	72.3318	68.8913	72.0853	77.3937	74.211	53.2657	39.0823	37.9224	49.2153	40.7641	44.0102	68.8606	58.1301	68.1273	52.3354	53.8733	60.7089	46.1392	46.689	32.0636	65.0008	63.4162	64.9508	57.3275	50.7107	39.3174	64.7336	70.4978	65.2769
evm.TU.chr5.1051	22.7638	24.8471	23.6345	23.3023	23.6255	24.7691	19.2757	18.8972	17.644	18.2514	18.7567	19.2101	24.2996	24.9653	25.9543	23.6676	23.6261	28.1452	22.5655	22.0294	18.9148	21.9836	20.6176	22.5108	21.4	22.2465	21.8317	22.5544	21.8923	21.0519
evm.TU.chr20.395	31.0905	31.3171	28.6098	27.4974	27.7713	27.4395	23.6398	19.9727	22.0864	18.3285	18.7947	18.0049	25.9947	21.8098	25.8573	23.9507	22.4911	21.3496	23.8947	29.3738	23.6717	20.939	19.8882	20.0311	28.5389	25.0431	24.0313	20.4997	21.304	21.4848
evm.TU.chr3.1396	80.2598	97.9839	114.986	87.1958	95.3805	100.587	50.0275	62.9344	56.8398	83.7068	78.4011	81.9613	52.5223	62.2666	67.7446	85.3847	71.0772	54.7124	51.6824	70.1136	79.8825	47.6899	57.6659	61.8001	76.518	61.8067	51.4674	49.8958	59.58	50.545
evm.TU.chr16.460	87.1222	94.6452	87.5685	62.1416	72.1787	67.2614	30.4749	27.9389	23.8582	22.33	24.2378	26.7026	21.906	23.5284	20.5947	21.2506	24.1995	23.0752	25.3429	41.4842	16.5084	21.8475	20.8027	22.8997	19.3571	75.3927	34.4755	35.4954	37.7863	32.3866
evm.TU.chr20.189	43.5967	42.8326	40.1082	43.8676	56.5409	47.9037	27.2265	25.2008	24.391	30.1615	35.0647	31.1441	24.9965	23.7033	28.2346	33.5644	31.6257	33.1742	21.9439	16.3938	7.68812	25.3975	33.7347	28.8369	23.5795	29.4763	18.1634	25.6443	18.7634	26.5474
evm.TU.chr29.273	35.6664	33.474	30.053	43.5705	54.9935	53.3681	64.1877	91.4431	76.9675	74.9891	140.245	97.9441	51.6459	53.0094	53.479	63.5875	54.1838	68.268	39.7377	38.4884	45.4416	47.257	71.5354	46.8017	14.219	81.0419	44.252	60.4978	87.2509	77.7306
evm.TU.chr18.369	24.2512	22.7357	21.4745	20.3413	24.0758	24.9176	23.6355	23.5318	18.6776	20.4625	30.2727	25.0179	33.0859	37.3601	38.803	41.1958	36.3971	54.121	22.5139	21.6317	22.1183	26.6045	31.2994	26.2367	25.2316	27.1972	25.3607	31.6871	31.9407	30.4933
evm.TU.chr8.469	36.9797	38.1989	38.9343	24.1076	27.5804	29.4539	75.3287	105.405	84.8705	33.1377	41.7952	38.2661	53.2932	89.5044	40.679	36.7852	44.196	48.9416	53.8373	107.824	59.1534	28.9435	27.9395	26.0287	42.31	225.738	125.642	79.5134	101.387	77.6649
evm.TU.chr25.385	19.008	17.7813	19.3337	15.3598	16.095	15.2496	12.308	11.2574	12.3399	8.9789	12.8967	12.73	9.33938	10.2678	10.8625	8.82616	8.54108	8.76746	8.51731	12.3824	8.48386	7.57901	8.97999	8.24723	12.2434	26.0678	21.4755	14.1541	13.2003	10.0376
evm.TU.chr10.345	88.7613	83.0641	71.9287	67.9459	74.2605	76.4722	91.8475	73.9306	91.506	78.1076	81.0921	82.9081	50.2985	47.6262	51.6811	68.1476	69.1251	58.1464	71.3287	70.6446	69.7867	63.4783	54.001	73.6026	58.6834	60.5264	53.0572	61.554	55.8702	47.3264
evm.TU.chr8.584	48.6473	45.3478	49.8078	78.0436	77.7237	66.4621	80.0535	83.6012	80.9189	59.0446	72.9607	42.341	156.11	153.243	118.33	118.102	148.055	124.314	132.459	106.836	183.345	146.323	102.525	80.626	140.032	57.1684	132.86	67.5531	68.9889	116.464
evm.TU.chr3.851	80.1245	77.6004	74.6889	47.1614	49.1431	49.1233	8.95399	7.95407	3.76435	7.90163	12.3191	8.02577	5.81506	4.79358	5.09595	6.80949	12.5863	6.97852	16.9485	25.8667	7.17103	7.295	9.94345	11.746	3.81231	55.2891	20.959	18.7502	17.5569	17.8201
evm.TU.chr10.305	60.1883	50.794	62.8914	44.8191	43.0887	45.8908	17.1755	16.0284	7.89615	11.8644	24.9415	14.8704	5.02079	5.23077	4.94344	7.77515	8.20561	10.1813	15.0702	22.7486	9.5906	6.38937	11.9756	7.42353	0.218559	43.2789	15.0826	22.0558	26.1173	22.6028
evm.TU.chr3.1442	76.9377	76.1866	72.3132	80.7242	70.2418	72.9173	44.424	47.2839	40.992	44.0532	43.874	42.4521	40.5601	43.1079	39.2564	42.6609	40.24	44.2819	50.4574	56.1089	48.7358	49.2843	39.5568	44.2766	35.5256	61.1753	45.4324	47.2821	51.6104	51.5459
evm.TU.chr21.408	11.8773	11.0956	10.8523	14.9165	16.8806	14.1302	12.4491	19.9305	16.6033	15.1769	17.3422	16.0542	33.9596	29.8668	42.4648	26.926	24.7336	28.7727	21.7055	23.4561	24.5585	23.1927	21.0824	21.1456	32.8295	18.9722	28.9087	26.3877	20.8603	28.2635
evm.TU.chr10.392	18.1226	17.5309	17.59	19.3221	19.1746	18.3573	11.043	11.6585	11.154	11.5032	12.4553	11.5137	12.4344	11.5863	12.7394	15.5088	14.9496	14.0606	13.98	16.6284	14.3914	13.2055	13.7331	13.3704	11.4413	14.4351	11.7842	12.9399	13.8144	13.2039
evm.TU.chr10.216	83.5752	84.3451	81.7266	72.5727	77.7165	69.5032	48.1985	57.3656	44.122	36.5917	40.3737	44.2624	51.8574	52.7785	40.8835	36.8008	36.3584	43.5872	58.889	73.4697	56.1824	39.0128	33.1042	39.8798	56.0315	115.05	78.2406	63.4541	61.6863	78.3439
evm.TU.chr5.221	26.1269	28.6727	24.5238	31.6776	33.7995	37.238	21.4461	12.6956	14.1592	9.96797	8.98545	9.60425	8.87642	7.78943	8.08876	5.72407	5.65735	8.4949	17.7496	23.7926	13.0059	7.09279	7.22135	6.7413	8.13975	22.1558	8.43065	13.173	12.3533	8.8214
evm.TU.chr6.448	3.86227	3.95027	3.74723	4.82713	6.8147	4.24389	10.7085	11.3724	11.5324	8.064	9.15658	8.75126	23.8019	18.522	24.5394	21.0325	15.8098	17.5666	13.1108	12.7159	9.56568	12.5967	13.2839	12.9099	51.2516	6.5038	15.6131	12.3418	13.2104	12.1172
evm.TU.chr19.285	46.3342	53.5959	52.031	66.1352	62.0653	63.2329	34.3434	32.928	27.9499	39.5906	32.8266	43.1121	50.893	58.4874	79.5236	54.9348	46.2018	71.056	57.1972	44.3161	29.7392	66.6768	65.3319	64.2562	35.2236	41.6708	32.1925	63.6696	68.6156	54.867
evm.TU.chr5.1330	8.52073	13.6504	15.1243	19.1166	21.8013	20.1649	69.398	110.421	86.1279	73.5504	118.603	95.9801	140.724	175.788	159.737	310.121	330.194	147.898	55.4523	57.6507	144.982	87.3628	59.5822	102.655	71.3516	17.0152	40.2385	84.8409	52.633	122.533
evm.TU.chr24.78	3.31134	5.0348	2.58393	8.40214	6.59498	6.95179	41.7119	45.1662	29.8428	51.6774	56.4917	59.6458	26.2506	24.4822	24.485	15.7431	16.5258	26.1252	10.1569	4.27987	11.3444	20.8309	14.8486	14.2321	4.55829	3.02599	4.94214	19.786	13.8225	29.2986
evm.TU.chr4.641	34.1513	32.8882	34.3233	31.2845	33.4338	33.4505	29.0573	29.5421	23.7935	28.639	29.3872	28.7354	32.3024	34.2321	39.509	40.9828	34.4092	39.2379	31.3986	32.8869	32.9155	37.0488	34.1559	33.5392	31.2101	24.6794	33.8916	30.1076	35.0078	32.9264
evm.TU.chr1.2514	42.3568	41.4366	57.919	71.7823	56.8763	74.6853	19.3671	48.8949	25.5206	30.1994	35.5369	24.0898	27.8733	27.0572	60.7872	59.1545	69.7732	44.5462	53.913	58.0646	46.753	34.4313	44.7523	25.8116	3.22597	33.0124	11.3224	31.493	29.7884	16.4996
evm.TU.chr11.435	34.7573	36.9578	37.2731	34.0213	34.1468	37.182	15.8556	22.5762	14.4903	12.9717	12.7895	13.0489	16.8229	16.7905	14.5011	13.1195	12.8409	13.5041	26.9393	29.1551	19.8793	17.7243	13.2656	17.8688	14.0118	31.2507	20.7399	22.7709	23.5908	29.5143
evm.TU.chr5.212	34.1111	33.2635	32.6584	35.5138	33.2746	32.7269	28.409	26.0842	26.6813	24.5344	20.148	23.8823	38.11	43.5788	40.2371	35.1098	36.5248	37.0516	30.1207	30.0858	30.7545	32.4676	31.2328	32.5045	39.6073	20.2464	29.8609	26.9937	31.9524	26.3612
[truncated: 11,507 more rows]
